# Supplementary material for: Transcriptome network analysis implicates CX3CR1-positive type 3 dendritic cells in non-infectious uveitis
Source: eLife journal article supplement (doi:10.7554/elife.74913), 2023-04-12

AU versus HC

- Black module genes (n=1236)
- Blue module genes (n=432)
- Yellow module genes (n=328)
- Green module genes (n=310)

$R = 0.95$ ,  $p < 2.2e-16$

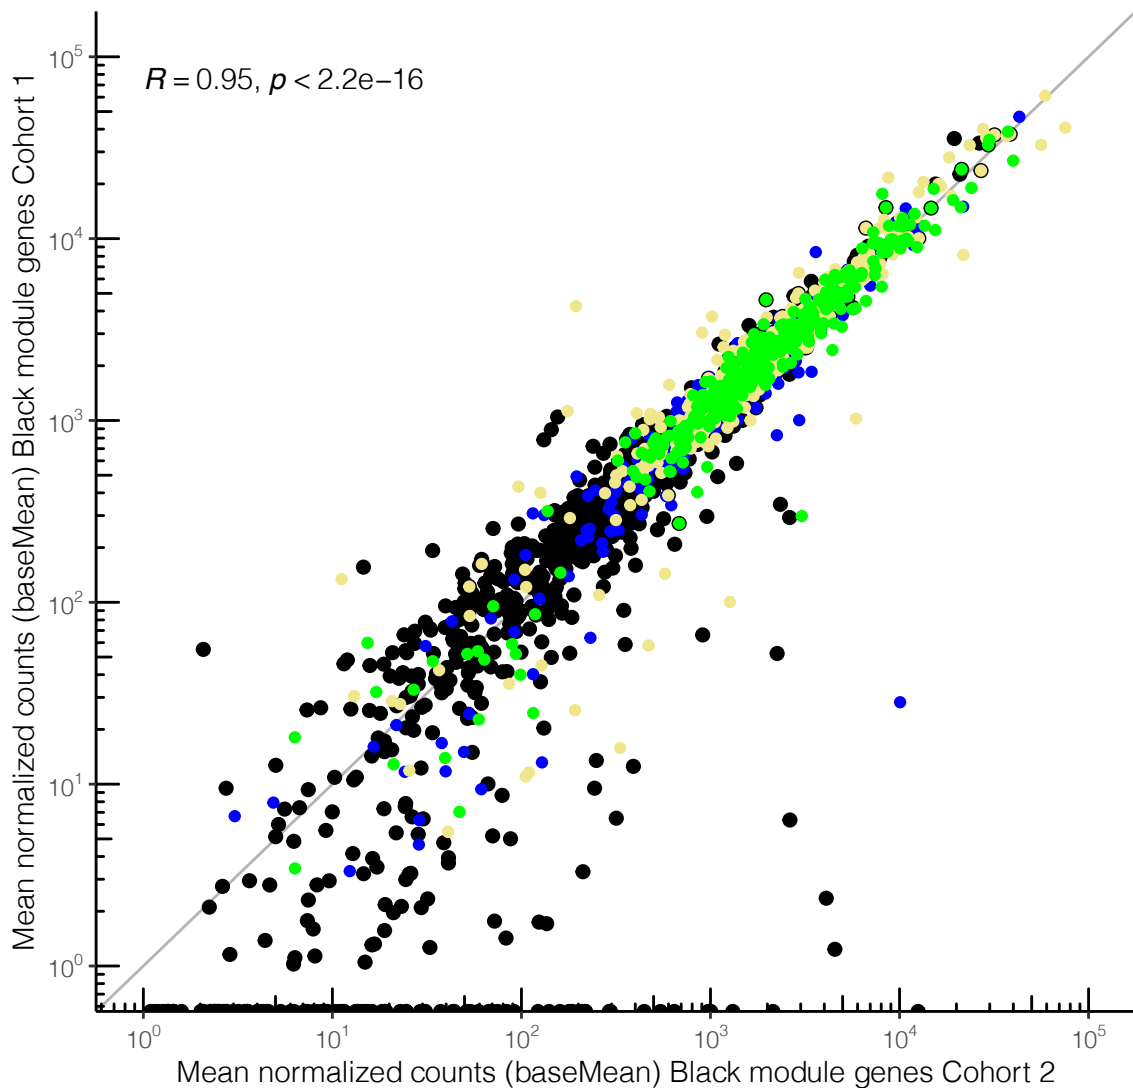

Supplement: supp [file elife_poa_e74913_Figure_1_figure_supplement_3.pdf › elife_poa_e74913_Figure_1_figure_supplement_3.pdf]
