# Supplementary material for: Transcriptome network analysis implicates CX3CR1-positive type 3 dendritic cells in non-infectious uveitis
Source: eLife journal article supplement (doi:10.7554/elife.74913), 2023-04-12
Supplement: supp [file elife_poa_e74913_Figure_4_figure_supplement_1.pdf › elife_poa_e74913_Figure_4_figure_supplement_1.pdf]

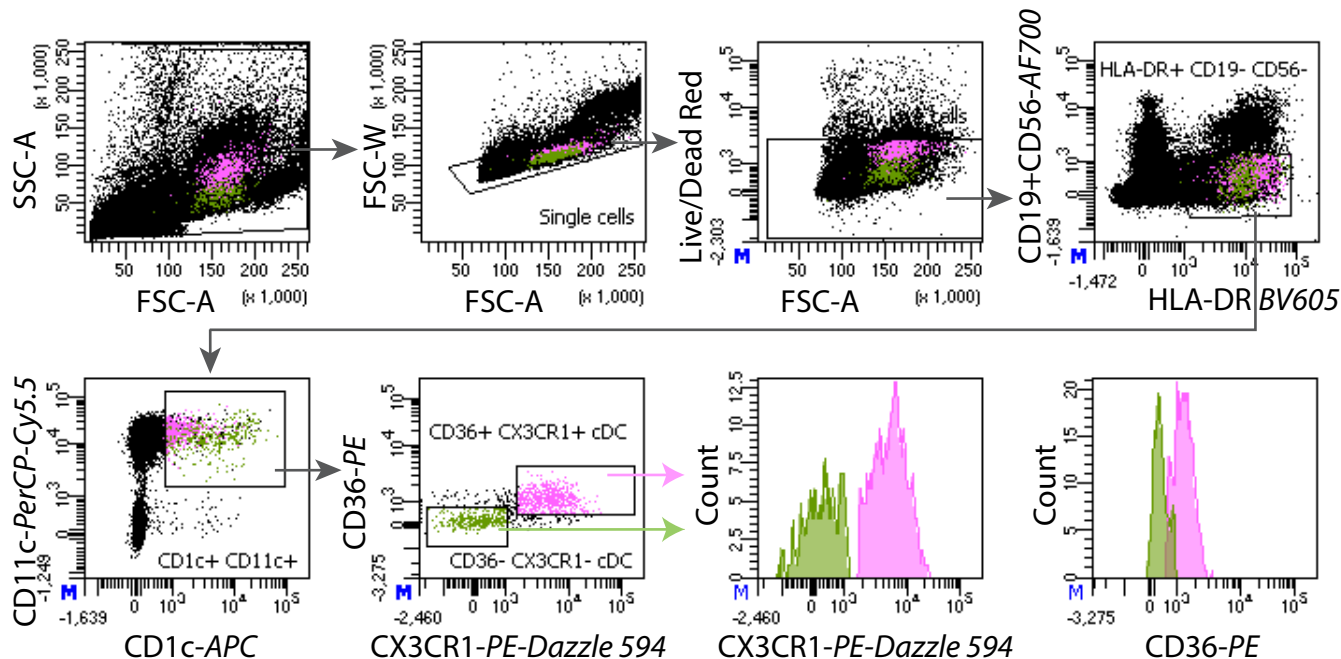

Tube: donor 1 Buffy

| Population          | #Events | %Parent | %Total |
|---------------------|---------|---------|--------|
| All Events          | 181,274 | ####    | 100.0  |
| FCS/SSC             | 100,037 | 55.2    | 55.2   |
| Single cells        | 94,165  | 94.1    | 51.9   |
| Live cells          | 92,026  | 97.7    | 50.8   |
| HLA-DR+ CD19- CD56- | 20,907  | 22.7    | 11.5   |
| CD1c+ CD11c+        | 1,135   | 5.4     | 0.6    |
| CD36+ CX3CR1+ cDC   | 589     | 51.9    | 0.3    |
| CD36- CX3CR1- cDC   | 345     | 30.4    | 0.2    |
