# Supplementary material for: Transcriptome network analysis implicates CX3CR1-positive type 3 dendritic cells in non-infectious uveitis
Source: eLife. 2023 Apr 12;12:e74913. doi: 10.7554/eLife.74913 (PMC10185339; doi:10.7554/eLife.74913)
Supplement: Supplementary file 1. — (A) Antibody panel used for sorting peripheral blood mononuclear cells. (B) Antibody panel used for determination of CD1c+ DC purity after MACS isolation. (C) Antibody panel used for phenotyping cDC2 populations in uveitis patients. (D) Overview of stimuli used for CD1c+ DC stimulations in Figure 3C. (E) Luminex analysis supernatant of LTA-stimulated CD1c+ DC sorted fraction (protein levels are in pg/mL). (F) Sequences of primers used for RT-qPCR. (G) Results from differential expression analysis and co-expression network analysis in cohort I. (H) Results from differential expression analysis and co-expression network analysis in cohort II. (I) 147 replicated co-expressed genes for cohort 1 and cohort 2 [file elife-74913-supp1.xlsx]

## Sheet: Supplementary File 1A
Supplementary File 1A. Antibody panel used for sorting peripheral blood mononuclear cells
Marker	Fluorochrome	Clone	Dilution	Company
CD123	FITC	6H6	01:20:00	eBioscience
CD14	PerCP-Cy5.5	HCD14	1:100	eBioscience
CD141 (BDCA3)	APC	AD5-14H12	01:20:00	Miltenyi
CD3	AF700	UCHT1	01:50:00	BioLegend
CD304 (BDCA4)	PE	AD5-17F6	01:20:00	Miltenyi
CD1c (BDCA1)	BV421	L161	1:25	BioLegend
CD8	V500	RPA-T8	01:50:00	BD
CD19	BV605	SJ25C1	01:50:00	BD
CD4	BV711	OKT4	1:50	BioLegend

## Sheet: Supplementary File 1B
Supplementary File 1B. Antibody panel used for determination of CD1c+ DC purity after MACS isolation
Marker	Fluorochrome	Clone	Dilution	Company
CD14	FITC	TÜK4	1:50	Miltenyi
CD45	PerCP	HI30	1:100	BioLegend
CD1c(BDCA1)	APC	L161	1:20	eBioscience
CD3	AF700	UCHT1	1:50	BioLegend
CD20	PE	2H7	1:50	eBioscience
CD19	eF450	HIB19	1:25	eBioscience

## Sheet: Supplementary File 1C
Supplementary File 1C. Antibody panel used for phenotyping cDC2 populations in uveitis patients
Marker	Fluorochrome	Clone	Dilution	Company
Live/Dead	APC-eF780	-	1:1000	eBioscience
CD5	BB515	UCHT2	1:100	BD
CD11c	PerCP-Cy5.5	Bu15	1:200	BioLegend
CD1c	APC	L161	1:50	eBioscience
CD3	AF700	UCHT1	1:50	BioLegend
CD19	AF700	HIB19	1:50	eBioscience
CD56	AF700	B159	1:50	BD
CD36	PE	CB38	1:200	BD
CX3CR1	PE/Dazzle594	2A9-1	1:100	BioLegend
CD180	PE/Cy7	MHR73-11	1:100	BioLegend
CCR2	BV421	K036C2	1:150	BioLegend
CD163	BV510	GHI/61	1:25	BioLegend
HLA-DR	BV605	G46-6	1:150	BD
CD14	BV785	M5E2	1:100	BioLegend

## Sheet: Supplementary File 1D
Supplementary File 1D. Overview of stimuli used for CD1c+ DC stimulations in Figure 3C
Stimulus	Concentration used	Company
R848	1µg/mL	Invivogen
Lipoteichoic acid (LTA)	1µg/mL	Sigma Aldrich
Lipopolysaccharide (LPS)	10ng/mL	Invivogen
Pam3CSK4	5µg/mL	Invivogen
oxLDL	50µg/mL	Cell Biolabs
TGFβ-b2	100ng/mL	R&D Systems
FLT3L	100ng/mL	Cellgenix
TNFα	100ng/mL	R&D Systems
S100A12 (EN-RAGE)	1µg/mL	R&D Systems
IL-4	10ng/mL	R&D Systems
IFNα-2a	1000U/mL	Cell Sciences
GM-CSF	800U/mL	R&D Systems

## Sheet: Supplementary File 1E
Supplementary file 1E. Luminex analysis supernatant of LTA-stimulated CD1c+ DC sorted fraction (protein levels are in pg/mL).
CD1c+ DC fraction	Donor	IL2	IL5	IL6	IL10	IL12	IL13	IL17	IL22	IL27	TNFa	IFNa	IFNb	I309/CCL1	IP10	BLC/CXCL13	VEGFA	CD40L	FAS	TNFR1	TNFR2	Elastase	GranB
CD36-/CX3CR1-	1	1.105	0.815	5837.77	479.89	23.95	0.82	90.03	1.3	79.85	1253.7	1	9.5	1297.38	2.14	1.15	9.17	3.6	11.425	40.45	141.4	7	5.055
CD36-/CX3CR1-	2	1.105	0.815	3930.75	291.57	20.8	0.82	43.23	1.3	121.67	986.11	1.82	9.5	1966.69	3.78	4.25	9.66	3.6	11.425	45.82	109.27	7	5.055
CD36+/CX3CR1+	1	1.105	0.815	20607.8	552.76	34.46	0.82	41.21	1.3	103.26	9528	1.33	9.5	1180.91	1.86	1.15	3.76	3.6	11.425	60.88	121.61	19.67	5.055
CD36+/CX3CR1+	2	1.105	0.815	20607.8	614.84	16.32	0.82	31.33	1.3	66.34	9528	2.25	9.5	1150.86	2.18	1.15	1.65	3.6	11.425	63.91	137.44	7	5.055
CD36-/CX3CR1-	3	1.105	0.815	3215.13	182.86	10.85	0.82	39.4	1.3	73.44	636.64	0.74	9.5	2396.14	1.84	1.15	6.49	3.6	11.425	45.46	111.72	7	5.055
CD36-/CX3CR1-	4	1.105	0.815	2742	136.92	9.71	0.82	46.55	1.3	72.13	835.03	0.74	9.5	3270.69	1.8	1.15	7.87	3.6	11.425	51.21	113.86	7	5.055
CD36+/CX3CR1+	3	1.105	0.815	20607.8	387.7	9.55	0.82	52.47	1.3	73.82	9528	0.63	9.5	1913.88	0.805	1.15	5.04	3.6	11.425	49.43	153.28	15.43	5.055
CD36+/CX3CR1+	4	1.105	0.815	20607.8	213.8	10.18	0.82	26.83	1.3	93.98	9528	0.94	9.5	2855.01	1.61	1.15	3.46	3.6	11.425	58.85	143.43	35.45	5.055

## Sheet: Supplementary File 1F
Supplementary File 1F. Sequences of primers used for RT-qPCR
Primer (gene) name	Sequence 5' - 3'
CD36 FW	AAAGAGGTCCTTATACGTACAGAGTTCGT
CD36 RV	AGCCTTCTGTTCCAACTGATAGTGA
RUNX3 FW	CAATGACGAGAACTACTCCGC
RUNX3 RV	GAAGCGAAGGTCGTTGAACC
GUSB FW	CACCAGGGACCATCCAATACC
GUSB RV	GCAGTCCAGCGTAGTTGAAAAA
CCR2 FW	CCACATCTCGTTCTCGGTTTATC
CCR2 RV	CAGGGAGCACCGTAATCATAATC
CX3CR1 FW	AGTGTCACCGACATTTACCTCC
CX3CR1 RV	AAGGCGGTAGTGAATTTGCAC
IRF8 FW	CGACGCGCACCATTCA
IRF8 RV	GCTTGCCCCCATAGTAGAAGCT
TLR7 FW	CAAGAAAGTTGATGCTATTGGGC
TLR7 RV	TGGTTGAAGAGAGCAGAGCA
CCR5 FW	TGCTACTCGGGAATCCTAAAAACT
CCR5 RV	TTCTGAACTTCTCCCCGACAAA

## Sheet: Supplementary File 1G
Supplementary File 1G. Results from differential expression analysis and co-expression network analysis in cohort I							LRT			AU vs HC			IU vs HC			BU vs HC			IU vs AU			BU vs AU			IU vs BU
ENSEMBLE_ID	Surfaceome_ID	moduleColor	Module Membership	P value Module Membership	External Gene Name	baseMean	log2FoldChange_LRT	pvalue_LRT	padj_LRT	log2FoldChange_AU_vs_HC	pvalue_AU_vs_HC	padj_AU_vs_HC	log2FoldChange_IU_vs_HC	pvalue_IU_vs_HC	padj_IU_vs_HC	log2FoldChange_BU_vs_HC	pvalue_BU_vs_HC	padj_BU_vs_HC	log2FoldChange_IU_vs_AU	pvalue_IU_vs_AU	padj_IU_vs_AU	log2FoldChange_BU_vs_AC	pvalue_BU_vs_AC	padj_BU_vs_AC	log2FoldChange_IU_vs_BU	pvalue_IU_vs_BU	padj_IU_vs_BU
ENSG00000168329	Yes	blue	-0.880649	1.42586e-12	CX3CR1	1802.03	1.3972	0.000112826	0.034551	0.893761	3.68019e-05	0.0232588	0.742939	0.000584614	0.103926	0.82995	0.000138303	0.044524	-0.150845	0.486298	1	-0.0638194	0.770907	1	-0.087027	0.687596	1
ENSG00000121807	Yes	blue	-0.846007	8.21215e-11	CCR2	2664.32	1.22563	8.27379e-06	0.009182	1.00328	6.7523e-07	0.00192035	0.798685	0.000163401	0.0812464	0.679843	0.000974869	0.117906	-0.204611	0.341143	1	-0.323488	0.124043	1	0.118881	0.584125	1
ENSG00000162511		blue	0.815718	1.35713e-09	LAPTM5	46811.5	-0.324547	1.34386e-07	0.000604	-0.402505	6.64329e-08	0.000377871	-0.3138	0.000591285	0.103926	-0.314302	7.28767e-05	0.044524	0.0887054	0.349792	1	0.0882042	0.290137	1	0.000501175	0.995939	1
ENSG00000109046		blue	-0.787951	1.17189e-08	WSB1	6019.62	0.571494	1.34775e-05	0.009182	0.525053	7.15207e-06	0.0135603	0.516318	0.000202481	0.082373	0.413634	0.000804151	0.106274	-0.0087285	0.951594	1	-0.111423	0.388406	1	0.102696	0.489383	1
ENSG00000163565		blue	-0.774817	2.91615e-08	IFI16	6031.1	0.577696	0.00167968	0.130059	0.435398	0.00205276	0.156618	0.493571	0.0025617	0.161459	0.462616	0.00178825	0.163314	0.0581864	0.730354	1	0.0272225	0.860016	1	0.0309646	0.858544	1
ENSG00000106560		blue	-0.74482	1.89618e-07	GIMAP2	585.154	1.57907	0.205117		0.289703	0.142861		0.359385	0.0443226		0.317009	0.0989601		0.0697157	0.687894	1	0.0273185	0.883676	1	0.0423989	0.801243	1
ENSG00000120063		blue	0.737051	2.95454e-07	GNA13	5514.03	-0.585232	0.00369402	0.197498	-0.488525	0.00139737	0.126162	-0.482188	0.00576723	0.220584	-0.373362	0.0194285	0.44544	0.00632667	0.971938	1	0.115172	0.487996	1	-0.108847	0.555531	1
ENSG00000119638		blue	-0.731632	3.98975e-07	NEK9	4092.86	0.435702	0.00293804	0.177918	0.448044	0.000502832	0.0733361	0.386087	0.010692	0.288234	0.323644	0.016924	0.421525	-0.0619558	0.691811	1	-0.124407	0.379477	1	0.062452	0.698443	1
ENSG00000088986		blue	-0.711628	1.13978e-06	DYNLL1	1736.13	0.662313	0.00286862	0.177918	0.73173	0.000245111	0.0516367	0.465393	0.0270977	0.401905	0.523333	0.0103244	0.343489	-0.266378	0.212985	1	-0.208429	0.317409	1	-0.0579499	0.788843	1
ENSG00000100221		blue	0.706986	1.43631e-06	JOSD1	3006.39	-0.384912	0.00699368	0.263738	-0.403415	0.00486657	0.231267	-0.336829	0.0419798	0.459315	-0.441797	0.0032589	0.224363	0.0665883	0.696701	1	-0.0383883	0.806189	1	0.104977	0.550281	1
ENSG00000158480		blue	0.705148	1.57204e-06	SPATA2	485.982	-1.26742	0.107745		-0.414656	0.043699		-0.385685	0.0403001		-0.439251	0.0286198		0.0289737	0.874547	1	-0.0246113	0.900078	1	0.0535865	0.764443	1
ENSG00000113448		blue	0.704644	1.61128e-06	PDE4D	385.007	-1.48416	0.0356347		-0.531526	0.00513641		-0.371726	0.0288618		-0.351805	0.0557798		0.159877	0.331195	1	0.179814	0.312392	1	-0.0199384	0.900306	1
ENSG00000165934		blue	-0.703586	1.69659e-06	CPSF2	1557.27	0.563078	0.000741508	0.083253	0.329119	0.0411864	0.521755	0.459949	0.0115425	0.288352	0.668744	6.80965e-05	0.044524	0.13085	0.484477	1	0.339664	0.0511015	1	-0.208816	0.276203	1
ENSG00000175197		blue	0.70233	1.80325e-06	DDIT3	472.161	-1.66065	0.0123283		-0.577907	0.00782901		-0.603867	0.00331392		-0.543483	0.0113699		-0.0259967	0.898112	1	0.0344307	0.871237	1	-0.0604307	0.762462	1
ENSG00000163154		blue	-0.690442	3.16303e-06	TNFAIP8L2	1007.51	0.16985	0.0861614		0.510208	0.0199089	0.398739	0.165815	0.432067		0.392742	0.0714199		-0.344507	0.10022	1	-0.117495	0.587938	1	-0.227018	0.27377	1
ENSG00000125089		blue	0.689683	3.27559e-06	SH3TC1	6958.72	-0.759294	8.22839e-05	0.032426	-0.50897	0.000316184	0.0591394	-0.639127	9.48586e-05	0.0644914	-0.443035	0.00279206	0.198325	-0.130182	0.440938	1	0.0659388	0.66946	1	-0.196123	0.259248	1
ENSG00000165997		blue	0.686193	3.84209e-06	ARL5B	1408.2	-0.763426	0.0157175	0.35426	-0.574342	0.0041879	0.216553	-0.506072	0.0165325	0.328814	-0.458803	0.0251802	0.46674	0.0682686	0.750145	1	0.115559	0.580876	1	-0.047292	0.827287	1
ENSG00000211455		blue	-0.677517	5.65953e-06	STK38L	2506.16	0.649569	0.0614712	0.597548	0.444001	0.0180739	0.387056	0.457698	0.0242807	0.380909	0.338213	0.0803449	0.630778	0.0137119	0.947279	1	-0.105802	0.594523	1	0.119517	0.570785	1
ENSG00000174485		blue	0.671803	7.25356e-06	DENND4A	1897.22	-0.299727	0.000653768	0.079353	-0.545078	0.000885709	0.104957	-0.275733	0.135014	0.621263	-0.616975	0.000299973	0.0671189	0.26938	0.155305	1	-0.0719104	0.684394	1	0.341294	0.0787357	1
ENSG00000161929		blue	-0.66482	9.75283e-06	SCIMP	3601.28	0.525923	0.00676012	0.261722	0.432618	0.00250666	0.173877	0.446485	0.00697189	0.241903	0.36559	0.0148078	0.398354	0.013876	0.935192	1	-0.0670327	0.66795	1	0.0809098	0.644881	1
ENSG00000132824	Yes	blue	-0.663744	1.02013e-05	SERINC3	3800.06	0.125994	0.0156022	0.35426	0.360042	0.00280029	0.186251	0.124725	0.382034	0.836811	0.285615	0.0245333	0.46674	-0.235332	0.110818	1	-0.0744294	0.575371	1	-0.160904	0.291077	1
ENSG00000084733		blue	-0.660189	1.1819e-05	RAB10	3414.19	0.535385	0.000567878	0.076865	0.345145	0.0113613	0.326293	0.465131	0.00340913	0.189136	0.553791	0.000109557	0.044524	0.120001	0.464284	1	0.208663	0.16234	1	-0.0886622	0.599594	1
ENSG00000107099		blue	-0.654499	1.48997e-05	DOCK8	12436.4	0.205145	0.00135853	0.11093	0.282083	0.00651961	0.252021	0.196587	0.114607	0.601685	0.411862	0.000173987	0.044524	-0.0854992	0.507859	1	0.129786	0.25937	1	-0.215286	0.107142	1
ENSG00000072364		blue	0.636117	3.05043e-05	AFF4	3008.36	-0.602452	0.0192145	0.381257	-0.299083	0.0500466	0.538902	-0.486577	0.0052812	0.205436	-0.373727	0.0191206	0.442726	-0.187525	0.296512	1	-0.0746518	0.652575	1	-0.112875	0.54054	1
ENSG00000165240		blue	-0.634326	3.26299e-05	ATP7A	542.879	1.46634	0.0516649		0.540899	0.00842614		0.395397	0.035197		0.309566	0.122387		-0.145548	0.426833	1	-0.231417	0.236985	1	0.0858719	0.630392	1
ENSG00000013441		blue	0.63415	3.2846e-05	CLK1	5243.73	-0.160161	0.0102809	0.30872	-0.473611	0.00216061	0.157558	-0.159292	0.365512	0.82371	-0.387098	0.016369	0.416524	0.314355	0.0827876	1	0.0865185	0.605645	1	0.227838	0.220558	1
ENSG00000139289		blue	0.632607	3.47947e-05	PHLDA1	24.34	-8.50325	6.58386e-07		-0.29203	0.0070701		-0.247334	0.00770426		-0.274309	0.00777512		0.044721	0.610748	1	0	1	1	0.0269914	0.74643	1
ENSG00000112245		blue	0.631801	3.58535e-05	PTP4A1	4442.07	-0.455056	0.00272789	0.175014	-0.525257	0.000383618	0.0604402	-0.38957	0.0219504	0.360172	-0.360141	0.0199823	0.449351	0.135693	0.438744	1	0.165129	0.305414	1	-0.0294363	0.870167	1
ENSG00000130522		blue	0.628339	4.07431e-05	JUND	9222.22	-0.303314	0.016918	0.361804	-0.226657	0.0860624	0.625989	-0.271097	0.0794315	0.55185	-0.434585	0.00174601	0.162779	-0.0444444	0.780749	1	-0.207944	0.151465	1	0.1635	0.320534	1
ENSG00000086730		blue	-0.627919	4.13745e-05	LAT2	6437.74	0.315188	0.0604972	0.592249	0.305958	0.0162262	0.371849	0.280592	0.0609136	0.511444	0.2669	0.0463614	0.547407	-0.0253642	0.869811	1	-0.0390599	0.780263	1	0.0136959	0.931632	1
ENSG00000277117		blue	0.627687	4.17286e-05	ICOSLG	308.343	-1.38828	0.119834		-0.41148	0.0295566		-0.336599	0.0466488		-0.376402	0.039748		0.0749113	0.647014	1	0.0350927	0.842901	1	0.0398199	0.801259	1
ENSG00000121864		blue	0.626859	4.30111e-05	ZNF639	1080.34	-0.518554	0.0134134		-0.529313	0.00513963	0.232769	-0.394442	0.0532959		-0.52517	0.00697882		0.134888	0.517167	1	0.00413848	0.98349	1	0.130751	0.536653	1
ENSG00000101161		blue	-0.622034	5.12228e-05	PRPF6	3517.34	0.367864	0.000398246	0.063876	0.378529	0.000350077	0.0603461	0.342249	0.0070462	0.241903	0.395422	0.000413671	0.0881513	-0.0362785	0.782748	1	0.016895	0.885555	1	-0.0531736	0.696067	1
ENSG00000165118		blue	-0.622021	5.12471e-05	C9orf64	253.781	1.29948	0.0364721		0.360134	0.0383607		0.218506	0.154613		0.424962	0.0111455		-0.141698	0.336958	1	0.0648574	0.687054	1	-0.206563	0.145732	1
ENSG00000103653		blue	-0.620075	5.49429e-05	CSK	12350.9	0.217598	0.0116514	0.314485	0.287462	0.00176562	0.145756	0.206981	0.0632617	0.517543	0.219492	0.024343	0.46674	-0.0804823	0.486289	1	-0.0679714	0.50677	1	-0.0125109	0.91682	1
ENSG00000095794		blue	0.618623	5.78564e-05	CREM	578.642	-1.05176	0.0709439		-0.537818	0.0139409		-0.443876	0.0338798		-0.375498	0.0834704		0.0939624	0.650398	1	0.162376	0.451032	1	-0.0684165	0.738352	1
ENSG00000130382		blue	-0.614656	6.65415e-05	MLLT1	1301.55	0.426341	0.000400192		0.60372	0.000197971	0.04331	0.369297	0.0436281		0.614699	0.000274164		-0.234449	0.212494	1	0.0109839	0.949986	1	-0.245435	0.202673	1
ENSG00000143013		blue	-0.61264	7.1389e-05	LMO4	1427.19	0.57497	0.00649651	0.255928	0.430555	0.0350905	0.498112	0.397414	0.0621259	0.512939	0.723394	0.00051184	0.0943498	-0.0331453	0.87797	1	0.2929	0.167276	1	-0.326051	0.134431	1
ENSG00000133313		blue	-0.612416	7.19482e-05	CNDP2	7445.15	0.185189	0.000780099	0.083415	0.394816	6.59485e-05	0.0312596	0.17876	0.13418	0.621263	0.264874	0.0114846	0.35444	-0.216065	0.0807402	1	-0.129947	0.237319	1	-0.0861187	0.50145	1
ENSG00000143183		blue	-0.611413	7.44958e-05	TMCO1	1180.05	0.811378	0.00381697		0.658195	0.000578268	0.0786591	0.568363	0.00568246		0.446392	0.0231655		-0.0898314	0.668027	1	-0.211834	0.293597	1	0.122005	0.566217	1
ENSG00000123908		blue	0.606374	8.85673e-05	AGO2	2712.1	-0.569107	0.0361074	0.496406	-0.427385	0.0105968	0.317556	-0.437432	0.0195107	0.347552	-0.233674	0.178825	0.776882	-0.0100621	0.958266	1	0.193734	0.281785	1	-0.203799	0.300241	1
ENSG00000115271		blue	-0.604025	9.59113e-05	GCA	2488.18	0.133423	1.022e-05	0.009182	0.59263	0.000183063	0.0416506	0.162255	0.366497	0.82371	0.730661	9.71855e-06	0.0374879	-0.430433	0.0198282	1	0.138049	0.420651	1	-0.568488	0.00269414	1
ENSG00000116017		blue	-0.603206	9.85984e-05	ARID3A	1321.98	0.726287	0.055356		0.399678	0.0361582	0.500244	0.499106	0.0149968		0.404967	0.038945		0.0994584	0.634461	1	0.00529233	0.979025	1	0.0941682	0.657562	1
ENSG00000129566		blue	-0.597347	0.000119886	TEP1	6156.16	0.176303	0.100474	0.690409	0.243962	0.0594519	0.566889	0.163519	0.281777	0.766366	0.313418	0.0213498	0.459558	-0.0804487	0.608343	1	0.0694612	0.62532	1	-0.149911	0.354434	1
ENSG00000163660		blue	0.593963	0.000133983	CCNL1	9911.22	-0.412429	0.0352807	0.496406	-0.309571	0.0159138	0.371849	-0.360091	0.0169996	0.331741	-0.238145	0.0779928	0.623246	-0.0505298	0.745918	1	0.0714303	0.612936	1	-0.121961	0.448268	1
ENSG00000144909		blue	-0.593544	0.000135826	OSBPL11	2474.06	0.13192	0.084417	0.667624	0.354312	0.0386058	0.509152	0.133046	0.485316	0.873608	0.390945	0.0278637	0.46674	-0.221299	0.257738	1	0.0366404	0.842002	1	-0.257942	0.19681	1
ENSG00000170776		blue	0.593107	0.000137775	AKAP13	12588.1	-0.139639	0.00131725	0.110627	-0.353556	8.91172e-05	0.0356708	-0.13655	0.212371	0.697565	-0.204748	0.0323885	0.484745	0.217013	0.0561347	1	0.148811	0.138906	1	0.0682018	0.562452	1
ENSG00000123200		blue	-0.591233	0.000146422	ZC3H13	2663.45	0.781234	0.000235698	0.052849	0.466858	0.00138774	0.126162	0.638622	0.000146896	0.0812464	0.165743	0.278474	0.859368	0.171796	0.321788	1	-0.301141	0.0585384	1	0.472942	0.00798879	1
ENSG00000175155		blue	0.589027	0.000157224	YPEL2	2077.23	-0.469228	0.0699703	0.630501	-0.421304	0.0171286	0.380576	-0.360484	0.064503	0.52103	-0.337056	0.0654534	0.598446	0.0608204	0.760723	1	0.0842574	0.655545	1	-0.0234377	0.908441	1
ENSG00000100883		blue	-0.588405	0.000160392	SRP54	947.296	0.557265	0.0423739		0.392168	0.0641639		0.352257	0.102668		0.604958	0.00477942		-0.0399176	0.854427	1	0.212842	0.326846	1	-0.252764	0.247145	1
ENSG00000169813		blue	-0.58784	0.000163326	HNRNPF	5591.62	0.272093	0.0813168	0.659194	0.299395	0.0154449	0.366045	0.244655	0.093686	0.582855	0.220169	0.0909662	0.658596	-0.0547396	0.716841	1	-0.07923	0.560757	1	0.0244907	0.87508	1
ENSG00000077420		blue	-0.58712	0.000167127	APBB1IP	2744.31	0.607551	0.0273135	0.442788	0.383334	0.0161279	0.371849	0.481623	0.00760642	0.251119	0.293789	0.0769502	0.618226	0.0983116	0.59622	1	-0.0895539	0.60336	1	0.187868	0.323356	1
ENSG00000115339		blue	0.58391	0.000185073	GALNT3	678.078	-0.819505	0.0558218		-0.344876	0.113705		-0.426185	0.047809		-0.579149	0.00804656		-0.0813459	0.70568	1	-0.234354	0.28522	1	0.153011	0.47586	1
ENSG00000189067		blue	0.581861	0.000197416	LITAF	5918.94	-0.212214	0.0240979	0.422749	-0.375848	0.00415297	0.216553	-0.196841	0.20009	0.689937	-0.301749	0.0286419	0.470245	0.179019	0.259426	1	0.0741028	0.606891	1	0.104917	0.521441	1
ENSG00000125703		blue	-0.581628	0.000198868	ATG4C	786.038	0.850169	0.0815769		0.556808	0.0110865		0.379384	0.0729181		0.292748	0.179435		-0.177467	0.398532	1	-0.264135	0.223969	1	0.0866711	0.677152	1
ENSG00000239653		blue	0.579844	0.000210278	PSMD6-AS2	229.586	-2.16083	0.119507		-0.36359	0.0413583		-0.317736	0.0441661		-0.201587	0.240786		0.0458705	0.7628	1	0.162086	0.327349	1	-0.116221	0.427375	1
ENSG00000062716		blue	-0.579661	0.000211482	VMP1	1653.98	0.864393	0.00542956	0.236173	0.299254	0.0740093	0.611853	0.645248	0.000578349	0.103926	0.212409	0.22246	0.820623	0.346055	0.0721446	1	-0.0868564	0.629869	1	0.432917	0.0279043	1
ENSG00000111652		blue	-0.579427	0.000213035	COPS7A	1362.11	0.498922	0.0164164	0.356165	0.469274	0.00819737	0.283301	0.391577	0.0452967	0.46783	0.522061	0.00448489	0.247776	-0.0777023	0.698	1	0.0527975	0.780581	1	-0.130501	0.522967	1
ENSG00000102317		blue	0.57908	0.000215345	RBM3	14663.4	-0.184602	0.144497	0.750906	-0.188178	0.0327648	0.489284	-0.174344	0.103643	0.591912	-0.10084	0.2809	0.859368	0.0138334	0.900973	1	0.0873406	0.374182	1	-0.0735075	0.523562	1
ENSG00000096717		blue	0.577196	0.000228309	SIRT1	1953.72	-0.859538	0.00894037	0.289304	-0.570264	0.00542278	0.236834	-0.549446	0.0100291	0.282266	-0.570649	0.00629021	0.287818	0.0208062	0.923312	1	-0.00039091	0.998533	1	0.0211967	0.922543	1
ENSG00000116786		blue	0.576721	0.000231685	PLEKHM2	5011.83	-0.44468	0.00145604	0.114721	-0.42323	0.000391511	0.0604402	-0.399098	0.00479683	0.203306	-0.278339	0.0270164	0.46674	0.0241277	0.869129	1	0.144898	0.271442	1	-0.120772	0.424517	1
ENSG00000134109		blue	0.576438	0.000233715	EDEM1	6565.99	-0.323984	0.027631	0.442788	-0.28946	0.0232418	0.425078	-0.289922	0.053255	0.499385	-0.350909	0.00895544	0.325818	-0.000465017	0.997607	1	-0.0614535	0.661414	1	0.0609887	0.702978	1
ENSG00000029363		blue	0.57404	0.000251593	BCLAF1	7316.2	-0.258686	0.0102595	0.30872	-0.34976	0.00115033	0.118503	-0.240564	0.061937	0.512939	-0.213464	0.0605617	0.579269	0.1092	0.413448	1	0.136301	0.253112	1	-0.027102	0.844424	1
ENSG00000072609		blue	-0.573493	0.000255835	CHFR	2816.32	0.329096	0.0492843	0.554727	0.352276	0.00874748	0.288008	0.289043	0.0654419	0.522828	0.257255	0.0684346	0.599305	-0.0632337	0.696306	1	-0.0950262	0.518929	1	0.0317929	0.848955	1
ENSG00000167258		blue	0.570995	0.000276051	CDK12	2598.75	-0.224064	0.00376759	0.199062	-0.428342	0.00346902	0.197318	-0.211816	0.209364	0.696995	-0.491277	0.00136675	0.139005	0.216548	0.213199	1	-0.0629441	0.693625	1	0.279494	0.118102	1
ENSG00000155629		blue	-0.570601	0.000279367	PIK3AP1	6095.14	0.0759482	0.0263999	0.439118	0.345817	0.00610137	0.244399	0.0820473	0.580677	0.913042	0.278271	0.0361097	0.500281	-0.263789	0.0857996	1	-0.0675489	0.626464	1	-0.196242	0.215446	1
ENSG00000106785		blue	-0.567917	0.000302911	TRIM14	2282.34	0.357084	0.182499	0.802598	0.274624	0.162861	0.741842	0.258511	0.216105	0.698467	0.435507	0.030753	0.484576	-0.0161138	0.939571	1	0.160914	0.435393	1	-0.177031	0.410947	1
ENSG00000204842		blue	-0.567227	0.000309243	ATXN2	702.992	0.961505	0.110167		0.408457	0.0574144		0.501744	0.0203236		0.328344	0.129729		0.0933256	0.667587	1	-0.0801306	0.713977	1	0.173461	0.425152	1
ENSG00000175104		blue	0.567146	0.000309991	TRAF6	727.459	-1.06309	0.00474569		-0.678689	0.00116588		-0.608298	0.00466211		-0.310471	0.143297		0.0703819	0.745919	1	0.368304	0.0872376	1	-0.29793	0.172749	1
ENSG00000086062		blue	0.567003	0.000311328	B4GALT1	5438.03	-0.283313	0.00638861	0.255928	-0.364866	0.00287843	0.186251	-0.260816	0.0714649	0.536587	-0.370339	0.00409902	0.244445	0.104055	0.486944	1	-0.00547476	0.967645	1	0.10953	0.478423	1
ENSG00000127125		blue	-0.566075	0.000320081	PPCS	1109.32	0.838871	0.000754553		0.645169	0.00037098	0.0604402	0.624663	0.00164507		0.609138	0.0011417		-0.020495	0.919553	1	-0.0360318	0.851832	1	0.0155376	0.940105	1
ENSG00000168291		blue	-0.560454	0.000377979	PDHB	1688.02	0.334509	0.139505	0.750906	0.379945	0.0238083	0.428549	0.269892	0.151177	0.639065	0.260198	0.136352	0.725919	-0.110062	0.568424	1	-0.11976	0.50772	1	0.00969768	0.960818	1
ENSG00000124201		blue	0.558919	0.000395329	ZNFX1	1837.93	-0.417072	0.00020154	0.047638	-0.495465	0.0020844	0.156618	-0.364956	0.0448279	0.46783	-0.706856	2.51315e-05	0.0374879	0.130524	0.485269	1	-0.211421	0.224474	1	0.341948	0.0744504	1
ENSG00000111653		blue	-0.555567	0.000435722	ING4	1310.14	0.558118	0.0196662		0.47399	0.0146448	0.355848	0.404554	0.0511008		0.582461	0.00346213		-0.0694425	0.742255	1	0.108494	0.595105	1	-0.177939	0.405988	1
ENSG00000129317		blue	-0.554226	0.000452877	PUS7L	783.524	0.594273	0.15029		0.474178	0.0302031		0.288237	0.178977		0.127661	0.559501		-0.185983	0.38499	1	-0.346614	0.113494	1	0.160635	0.450539	1
ENSG00000151553		blue	0.55349	0.000462561	FAM160B1	727.61	-1.29311	0.00261688		-0.513245	0.0102864		-0.768259	0.000268777		-0.386765	0.0585387		-0.255112	0.233549	1	0.126503	0.544783	1	-0.381625	0.0780565	1
ENSG00000171155		blue	-0.552626	0.000474142	C1GALT1C1	245.903	2.13946	0.0740676		0.393189	0.0174025		0.264188	0.068626		0.181339	0.253485		-0.129057	0.35349	1	-0.211949	0.163906	1	0.0828948	0.534688	1
ENSG00000163832		blue	0.548067	0.000539675	ELP6	398.803	-1.65033	0.08567		-0.397283	0.0651116		-0.488523	0.0155771		-0.312756	0.140446		-0.0913031	0.646125	1	0.0845573	0.686092	1	-0.175868	0.367883	1
ENSG00000077348		blue	-0.547394	0.000549999	EXOSC5	794.756	1.34258	0.0685352		0.278358	0.204093		0.573725	0.00714561		0.332978	0.127749		0.295469	0.164277	1	0.0546373	0.802419	1	0.240838	0.253368	1
ENSG00000198113		blue	-0.546181	0.000569057	TOR4A	934.688	0.797336	0.000782956		0.68711	0.000126027		0.598453	0.00237389		0.493407	0.00776959		-0.0886555	0.659919	1	-0.193726	0.310663	1	0.105072	0.60907	1
ENSG00000170266		blue	-0.542699	0.00062708	GLB1	3321.41	0.398841	0.0964873	0.686551	0.387507	0.0267557	0.454267	0.314283	0.104494	0.591912	0.372447	0.0399103	0.514246	-0.0732287	0.711984	1	-0.0150591	0.935888	1	-0.05817	0.773929	1
ENSG00000143153	Yes	blue	-0.542497	0.000630592	ATP1B1	1361.42	0.555948	0.000328651	0.056768	0.781045	4.64258e-05	0.026407	0.433928	0.0350446	0.436463	0.657057	0.000854938	0.106274	-0.347173	0.0979358	1	-0.124002	0.539556	1	-0.223175	0.294645	1
ENSG00000131381		blue	0.541656	0.000645449	RBSN	1100.74	-0.154598	0.0676909		-0.362665	0.0827796	0.624438	-0.158477	0.461073		-0.531085	0.0123153		0.204241	0.347084	1	-0.16847	0.434123	1	0.372718	0.0880835	1
ENSG00000146535		blue	0.540942	0.00065829	GNA12	3493.99	-0.309867	0.123791	0.728632	-0.325999	0.0231288	0.425078	-0.264222	0.111166	0.601382	-0.182849	0.22408	0.820623	0.0617768	0.71802	1	0.143162	0.360935	1	-0.0813856	0.643719	1
ENSG00000160791	Yes	blue	-0.537505	0.000723369	CCR5	1174.03	0.637278	0.0113519		0.663229	0.00102064	0.118477	0.432537	0.0411886		0.423759	0.0398145		-0.230728	0.283062	1	-0.239511	0.254759	1	0.00878404	0.967738	1
ENSG00000120738		blue	0.53427	0.000789778	EGR1	1003.55	-1.13355	0.000623132		-0.635613	0.00371849	0.204133	-0.598995	0.00505754		-0.869257	7.04714e-05		0.0366141	0.863495	1	-0.233745	0.284916	1	0.270367	0.20112	1
ENSG00000139620		blue	0.533525	0.000805805	KANSL2	1169.54	-0.404295	0.0569281		-0.395193	0.04936	0.535401	-0.30042	0.155296		-0.534334	0.00928493		0.0947896	0.6587	1	-0.139177	0.506888	1	0.233971	0.280778	1
ENSG00000163468		blue	-0.533239	0.00081203	CCT3	4478.55	0.255785	0.0422958	0.513307	0.286333	0.0159151	0.371849	0.234545	0.095926	0.582855	0.301032	0.0162583	0.416524	-0.0517901	0.722347	1	0.0147008	0.910711	1	-0.0664911	0.658728	1
ENSG00000213281		blue	0.533184	0.000813251	NRAS	2647.33	-0.68921	0.0117534	0.314485	-0.323042	0.0308715	0.478467	-0.551129	0.00132761	0.125305	-0.214907	0.169727	0.77564	-0.228127	0.197201	1	0.108145	0.506637	1	-0.336276	0.0642621	1
ENSG00000117133		blue	0.532863	0.000820307	RPF1	1029.83	-0.312888	0.0376682		-0.351764	0.0432185	0.525829	-0.26342	0.171955		-0.498954	0.00567722		0.0883554	0.654897	1	-0.147215	0.429706	1	0.235573	0.24329	1
ENSG00000245532		blue	0.532776	0.000822216	NEAT1	11030.5	-0.538871	0.00224693	0.15764	-0.427786	0.00110427	0.118503	-0.467114	0.00236179	0.158936	-0.279414	0.042714	0.528506	-0.0393403	0.804264	1	0.148381	0.302847	1	-0.187723	0.251315	1
ENSG00000165782		blue	0.531532	0.000850135	TMEM55B	3035.04	-0.461039	0.079563	0.658863	-0.301138	0.0458534	0.529035	-0.377814	0.0287453	0.41101	-0.280589	0.0751742	0.61808	-0.0766921	0.666503	1	0.0205503	0.900291	1	-0.0972438	0.59472	1
ENSG00000079785		blue	-0.53085	0.000865783	DDX1	1370.29	0.603983	0.0631475	0.602573	0.35765	0.0412939	0.521955	0.452299	0.0196328	0.347552	0.369452	0.0418863	0.527391	0.0946729	0.633543	1	0.0118053	0.949797	1	0.0828692	0.682714	1
ENSG00000116584		blue	-0.526929	0.000960848	ARHGEF2	6662.41	0.312295	0.0530926	0.574488	0.252652	0.0196427	0.396198	0.283165	0.0289315	0.41101	0.100073	0.38208	0.906153	0.0305187	0.820202	1	-0.152586	0.203544	1	0.183106	0.187394	1
ENSG00000100418		blue	-0.526417	0.000973915	DESI1	1169.8	0.436184	0.0999202		0.413217	0.0240065	0.430755	0.330447	0.0981816		0.372127	0.048954		-0.0827762	0.68526	1	-0.0410929	0.832751	1	-0.0416836	0.841161	1
ENSG00000137411		blue	-0.523235	0.00105873	VARS2	1242.73	0.841425	0.247072		0.42367	0.0489168	0.533916	0.300321	0.136239		0.228575	0.280583		-0.123384	0.533995	1	-0.19516	0.350031	1	0.0717784	0.712522	1
ENSG00000198876		blue	-0.520428	0.00113887	DCAF12	1124.49	0.538067	0.0533593		0.501442	0.0111876	0.326293	0.377771	0.0713771		0.445613	0.0276843		-0.123687	0.56144	1	-0.0558352	0.787359	1	-0.0678523	0.753052	1
ENSG00000268043		blue	0.520224	0.00114491	NBPF12	1503.93	-0.572717	0.00904201	0.290055	-0.437242	0.0123796	0.333722	-0.446622	0.0209934	0.354511	-0.541887	0.00277933	0.198325	-0.00939061	0.96223	1	-0.104664	0.576001	1	0.0952738	0.637964	1
ENSG00000171067	Yes	blue	-0.520187	0.00114602	C11orf24	672.96	0.710687	0.0351409		0.608069	0.00410496		0.425338	0.0487698		0.396484	0.0644492		-0.182762	0.400888	1	-0.211628	0.329622	1	0.0288672	0.894848	1
ENSG00000166747		blue	0.519648	0.00116209	AP1G1	2868.01	-0.362663	0.0890687	0.66859	-0.3877	0.0151967	0.363189	-0.297401	0.0999655	0.587666	-0.240929	0.147803	0.744136	0.0903031	0.627172	1	0.146785	0.395514	1	-0.0564828	0.766943	1
ENSG00000143753		blue	-0.519386	0.00116999	DEGS1	2698.14	0.561276	0.118374	0.711669	0.30678	0.0730632	0.608468	0.417232	0.0285366	0.41101	0.160191	0.367163	0.903076	0.110478	0.571815	1	-0.146607	0.424797	1	0.257089	0.198033	1
ENSG00000104731		blue	-0.517987	0.0012129	KLHDC4	1107.88	0.730564	0.00450984		0.364759	0.0217072	0.406153	0.580579	0.00126223		0.456405	0.00587149		0.215856	0.243647	1	0.0916572	0.593891	1	0.124201	0.512904	1
ENSG00000025770		blue	0.517933	0.00121458	NCAPH2	1085.78	-0.92793	0.0381993		-0.393127	0.0485087	0.533003	-0.5735	0.00642205		-0.386541	0.0578821		-0.180436	0.398681	1	0.00658421	0.974783	1	-0.187025	0.387231	1
ENSG00000106009		blue	-0.516967	0.00124505	BRAT1	2117.07	0.439868	0.0227458	0.416415	0.334394	0.0269371	0.454267	0.369718	0.0326341	0.42969	0.442198	0.00513062	0.260961	0.0353334	0.842833	1	0.107816	0.511645	1	-0.0724832	0.692082	1
ENSG00000171148		blue	-0.515346	0.00129773	TADA3	2381.12	-0.0500559	0.0117234	0.314485	0.362412	0.0275764	0.459174	0.00816932	0.964775	0.992955	0.464593	0.00663813	0.290589	-0.354297	0.0622237	1	0.102196	0.564438	1	-0.456498	0.018947	1
ENSG00000173456		blue	0.514739	0.00131795	RNF26	951.634	-1.53606	0.000210063		-0.500308	0.0116979		-0.916711	1.26657e-05		-0.541135	0.00770891		-0.416544	0.0509653	1	-0.0408374	0.8441	1	-0.375716	0.0819695	1
ENSG00000272325		blue	0.512708	0.00138763	NUDT3	6541.97	-0.495894	0.00813326	0.277662	-0.147399	0.168339	0.746097	-0.445355	0.000516656	0.103926	-0.183991	0.103934	0.685997	-0.297978	0.024953	1	-0.0365929	0.757754	1	-0.261386	0.0572693	1
ENSG00000165732		blue	0.511963	0.00141397	DDX21	7112.85	-0.329408	0.0173606	0.366945	-0.313086	0.00395676	0.210337	-0.300953	0.0206453	0.354511	-0.180188	0.116653	0.695813	0.0121302	0.928252	1	0.132904	0.269653	1	-0.120774	0.386013	1
ENSG00000204264		blue	-0.51009	0.0014822	PSMB8	3541.8	0.37403	0.0207234	0.394359	0.391753	0.00638328	0.250401	0.324654	0.0504517	0.484541	0.3811	0.0113424	0.35444	-0.0671011	0.695001	1	-0.0106517	0.945832	1	-0.0564497	0.748467	1
ENSG00000121274		blue	0.509739	0.00149533	PAPD5	885.633	-0.107308	0.0315848		-0.576136	0.0035149		-0.122913	0.55708		-0.220035	0.276305		0.453316	0.0332162	1	0.356169	0.0850314	1	0.0971494	0.65221	1
ENSG00000082805		blue	0.508853	0.00152884	ERC1	1314.25	-0.445489	0.149103		-0.420891	0.0332389	0.489284	-0.313853	0.134122		-0.335248	0.097636		0.107052	0.615282	1	0.0856562	0.679075	1	0.0213958	0.920979	1
ENSG00000189091		blue	-0.50471	0.00169455	SF3B3	3952.17	0.307495	0.127156	0.73495	0.272769	0.0340655	0.490666	0.270563	0.0735058	0.541035	0.205463	0.129254	0.712751	-0.00220143	0.988758	1	-0.0673096	0.634277	1	0.0651088	0.686159	1
ENSG00000205581		blue	0.50129	0.00184304	HMGN1	6130.51	-0.28004	0.0031022	0.180813	-0.0661432	0.518321	0.90783	-0.259006	0.0355297	0.438131	-0.374814	0.000545502	0.0943498	-0.192873	0.130953	1	-0.308684	0.00664646	1	0.115812	0.381007	1
ENSG00000113300		blue	-0.501064	0.00185324	CNOT6	1247.7	0.544218	0.0871914		0.320332	0.080048	0.624438	0.398675	0.0459491		0.431155	0.0224695		0.0783642	0.701127	1	0.110842	0.5688	1	-0.0324773	0.875882	1
ENSG00000185950		blue	0.499929	0.00190523	IRS2	1739.66	-0.411072	0.114414	0.705814	-0.445521	0.0400344	0.514903	-0.270848	0.20973	0.696995	-0.463779	0.0333805	0.487556	0.174721	0.419471	1	-0.0182703	0.933589	1	0.192996	0.371686	1
ENSG00000168802		blue	-0.49962	0.00191957	CHTF8	3101.19	0.478996	0.0261772	0.437033	0.276363	0.0471299	0.531895	0.407752	0.0116649	0.288352	0.362933	0.0129646	0.379194	0.131406	0.430887	1	0.0865777	0.569682	1	0.0448294	0.79407	1
ENSG00000111897	Yes	blue	0.49872	0.00196198	SERINC1	4491.59	-0.343846	0.0299517	0.459468	-0.423808	0.00504659	0.232769	-0.29528	0.0879269	0.566724	-0.319575	0.0431214	0.530133	0.128537	0.470822	1	0.104242	0.525875	1	0.0242952	0.894418	1
ENSG00000092847		blue	0.49847	0.00197388	AGO1	1871.83	-0.354356	0.00467297	0.225659	-0.407618	0.00137648	0.126162	-0.31921	0.0331726	0.432748	-0.358157	0.00756439	0.301084	0.0884107	0.56832	1	0.0494623	0.724245	1	0.0389485	0.807486	1
ENSG00000067064		blue	0.495728	0.00210889	IDI1	1597.96	-0.622201	0.0255761	0.433446	-0.500556	0.00694831	0.260013	-0.45339	0.0244551	0.380909	-0.396239	0.0382236	0.507482	0.0471613	0.818796	1	0.104331	0.595881	1	-0.0571713	0.784899	1
ENSG00000173846		blue	0.495663	0.0021122	PLK3	1151.48	-1.08473	0.0147679		-0.341656	0.0782974	0.619959	-0.654642	0.00159139		-0.152507	0.443734		-0.313089	0.138091	1	0.189182	0.353924	1	-0.502281	0.0189776	1
ENSG00000120868		blue	-0.495309	0.00213025	APAF1	4648.1	-0.0249868	0.0760672	0.645143	0.187243	0.103442	0.663513	-0.0105267	0.938701	0.987238	0.267283	0.0276611	0.46674	-0.197784	0.162744	1	0.0800455	0.528841	1	-0.277831	0.0577558	1
ENSG00000131873		blue	0.495132	0.00213932	CHSY1	1369.53	-1.07025	0.00333689	0.185012	-0.534573	0.00509577	0.232769	-0.694042	0.000721454	0.111328	-0.276391	0.158919	0.764991	-0.159534	0.445894	1	0.258225	0.199801	1	-0.417767	0.0493159	1
ENSG00000115548		blue	0.493955	0.00220047	KDM3A	2233.23	-0.675022	0.0151338	0.352154	-0.428222	0.0121087	0.331019	-0.514147	0.0068564	0.241903	-0.399919	0.02399	0.46674	-0.0859513	0.659498	1	0.0283047	0.877262	1	-0.114258	0.566656	1
ENSG00000100379		blue	0.492671	0.00226886	KCTD17	890.946	-0.594822	0.0369134		-0.568812	0.00451695		-0.397759	0.0594058		-0.26728	0.191678		0.171077	0.424632	1	0.301591	0.149233	1	-0.130516	0.546915	1
ENSG00000140350		blue	-0.491963	0.00230742	ANP32A	5997.22	0.265451	0.163008	0.776425	0.14846	0.125646	0.691763	0.245185	0.0362464	0.440768	0.123681	0.22849	0.822989	0.0967316	0.42558	1	-0.0247795	0.818213	1	0.121512	0.333854	1
ENSG00000184992		blue	-0.491682	0.00232287	BRI3BP	2407.36	0.224158	0.145031	0.750906	0.308318	0.113338	0.680026	0.186952	0.368145	0.824961	0.443098	0.0265281	0.46674	-0.121391	0.565937	1	0.134806	0.510006	1	-0.256201	0.23209	1
ENSG00000155363		blue	-0.491103	0.00235499	MOV10	1389.3	0.866691	0.00234379	0.159484	0.295175	0.0743303	0.611853	0.662718	0.000358711	0.0982811	0.445721	0.00957258	0.338586	0.367603	0.0538978	1	0.150564	0.398152	1	0.217042	0.266198	1
ENSG00000197912		blue	0.490873	0.00236784	SPG7	3066.79	-0.443254	0.110362	0.698076	-0.332362	0.0384653	0.509152	-0.345203	0.0572639	0.511444	-0.0997973	0.550864	0.951047	-0.012854	0.945104	1	0.23259	0.180295	1	-0.245447	0.199504	1
ENSG00000155876		blue	-0.49049	0.00238938	RRAGA	839.49	1.15624	0.000983737		0.626635	0.00197948		0.703084	0.000921942		0.165102	0.424523		0.0764896	0.722268	1	-0.461626	0.0285471	1	0.538126	0.0133052	1
ENSG00000090989		blue	-0.486701	0.00261216	EXOC1	978.289	0.299276	0.15015		0.217008	0.27549	0.831036	0.221071	0.293099		0.466223	0.0220002		0.00406356	0.984825	1	0.249263	0.230879	1	-0.245203	0.256686	1
ENSG00000173273		blue	0.485637	0.00267783	TNKS	1034.18	-1.32885	0.000883307		-0.427102	0.0252383	0.439316	-0.840566	4.2295e-05		-0.409565	0.0368674		-0.413589	0.04816	1	0.0175389	0.930613	1	-0.431137	0.0425123	1
ENSG00000073169		blue	0.484737	0.00273455	SELO	1778.8	-0.360425	0.137741	0.750906	-0.380656	0.0303189	0.475079	-0.284012	0.143668	0.636317	-0.300704	0.0985565	0.677401	0.0966528	0.627164	1	0.079961	0.670585	1	0.0166917	0.934503	1
ENSG00000185862	Yes	blue	-0.483721	0.00279984	EVI2B	6793.26	0.294702	0.015264	0.353354	0.215135	0.0451588	0.52812	0.272259	0.0343277	0.436463	0.340317	0.00272507	0.198325	0.0571289	0.668183	1	0.125188	0.292928	1	-0.0680591	0.621533	1
ENSG00000179134		blue	0.482176	0.00290166	SAMD4B	1672.55	-0.543648	0.00396191	0.204517	-0.290941	0.0669285	0.597939	-0.443156	0.0138313	0.309677	-0.574364	0.000524797	0.0943498	-0.152239	0.410984	1	-0.283457	0.0992159	1	0.131218	0.489536	1
ENSG00000149483		blue	0.481914	0.00291924	TMEM138	873.411	-0.614601	0.0228744		-0.494994	0.0083116		-0.448167	0.0272733		-0.453926	0.0187801		0.0468244	0.821258	1	0.0410711	0.836165	1	0.00575274	0.97822	1
ENSG00000164096		blue	-0.4819	0.00292022	C4orf3	3473.41	0.32937	0.0636217	0.602796	0.376907	0.0097576	0.305306	0.282674	0.0926123	0.582855	0.256246	0.0934059	0.667874	-0.094237	0.586505	1	-0.12067	0.447932	1	0.0264329	0.882046	1
ENSG00000123329		blue	-0.480704	0.00300174	ARHGAP9	6743.96	0.339991	0.0189342	0.379614	0.183537	0.0797296	0.624438	0.312288	0.0130075	0.300562	0.299428	0.00688323	0.290589	0.12876	0.323047	1	0.115896	0.318557	1	0.0128641	0.923983	1
ENSG00000116698		blue	0.479815	0.00306356	SMG7	3351.07	-0.200091	0.12404	0.728714	-0.293393	0.0176245	0.383122	-0.181633	0.213299	0.697565	-0.147267	0.258103	0.84769	0.111764	0.459066	1	0.146134	0.283346	1	-0.0343699	0.825394	1
ENSG00000069399		blue	0.479752	0.00306799	BCL3	2089.03	-0.790621	0.0235661	0.421654	-0.479165	0.0144979	0.355449	-0.527509	0.0114125	0.288352	-0.458526	0.0224655	0.46674	-0.0483712	0.819653	1	0.0206389	0.920073	1	-0.0690123	0.748199	1
ENSG00000085978		blue	0.477656	0.00321839	ATG16L1	1055.32	-0.722235	0.0143654		-0.484659	0.00592475	0.244399	-0.527263	0.00672211		-0.250977	0.168742		-0.04263	0.830631	1	0.233713	0.214623	1	-0.276347	0.174244	1
ENSG00000187742		blue	0.477576	0.0032243	SECISBP2	2677.49	-0.48871	0.0267775	0.442124	-0.344642	0.0130823	0.343515	-0.412904	0.010513	0.286863	-0.230938	0.11303	0.691776	-0.0682774	0.681897	1	0.113712	0.45438	1	-0.181991	0.288576	1
ENSG00000140941		blue	0.477265	0.00324722	MAP1LC3B	2828.69	-0.112453	0.154282	0.768362	-0.255387	0.118487	0.682585	-0.112504	0.541297	0.900058	-0.363834	0.0326369	0.485216	0.142903	0.450166	1	-0.108462	0.538937	1	0.251368	0.194649	1
ENSG00000135018		blue	0.476734	0.0032866	UBQLN1	3719.38	-0.451893	0.0699702	0.630501	-0.271139	0.0725758	0.606355	-0.371885	0.0315218	0.42488	-0.338468	0.0320559	0.484745	-0.100764	0.571621	1	-0.0673367	0.681765	1	-0.0334279	0.85503	1
ENSG00000037474		blue	-0.475865	0.00335199	NSUN2	2860.78	0.562183	0.0174233	0.366945	0.128247	0.359182	0.866056	0.467356	0.00397858	0.195101	0.309777	0.0347298	0.491711	0.339147	0.0428386	1	0.181544	0.235246	1	0.157604	0.360515	1
ENSG00000182858		blue	0.475536	0.00337704	ALG12	679.814	-0.449238	0.130058		-0.467617	0.0328266		-0.271691	0.203436		-0.426697	0.0510412		0.195987	0.357275	1	0.0409281	0.851456	1	0.155063	0.463283	1
ENSG00000100330		blue	0.475279	0.00339673	MTMR3	2667.61	-0.0280406	0.0676209	0.626156	-0.353773	0.0135064	0.347173	-0.0440272	0.790273	0.967294	-0.22697	0.130471	0.713598	0.309776	0.0696636	1	0.126812	0.417466	1	0.182966	0.297583	1
ENSG00000181284		blue	-0.474636	0.00344644	TMEM102	354.392	1.39175	0.21763		0.232867	0.263286		0.38776	0.0427771		0.335254	0.0996246		0.154959	0.407613	1	0.102427	0.607226	1	0.0525337	0.773648	1
ENSG00000118508		blue	-0.474047	0.00349255	RAB32	1724.77	0.312101	0.186644	0.809838	0.436592	0.0304126	0.475239	0.227648	0.282315	0.766366	0.279717	0.174394	0.77564	-0.208982	0.33071	1	-0.156902	0.455291	1	-0.0520813	0.810423	1
ENSG00000161960		blue	0.473345	0.00354809	EIF4A1	4629.63	-0.860962	4.20307e-05	0.020973	-0.408105	0.00225238	0.160144	-0.726825	3.25212e-06	0.0145532	-0.323469	0.0212195	0.459558	-0.318763	0.0481408	1	0.0846423	0.563625	1	-0.403409	0.015224	1
ENSG00000101407		blue	-0.473301	0.00355167	TTI1	546.341	1.23757	0.135772		0.376261	0.0854773		0.482024	0.0213516		0.265327	0.221515		0.105809	0.610229	1	-0.110969	0.606752	1	0.216784	0.290507	1
ENSG00000265206		blue	-0.472902	0.00358365	RP5-1171I10.5	2315.64	0.319671	0.0983279	0.688043	0.390063	0.0323952	0.48871	0.257082	0.196963	0.689937	0.410707	0.0291472	0.472585	-0.132999	0.513841	1	0.0206512	0.915191	1	-0.153652	0.459026	1
ENSG00000132510		blue	0.472017	0.00365544	KDM6B	3798.62	-0.249882	0.069629	0.630501	-0.437192	0.00741878	0.272245	-0.212259	0.248445	0.730018	-0.181775	0.284882	0.86189	0.224957	0.233913	1	0.255445	0.147179	1	-0.0304882	0.874836	1
ENSG00000121775		blue	-0.471963	0.00365987	TMEM39B	679.478	0.713385	0.0771737		0.457814	0.0343269		0.396054	0.0668538		0.519555	0.0169642		-0.0617699	0.775705	1	0.0617602	0.77804	1	-0.123532	0.568501	1
ENSG00000163961		blue	0.471806	0.00367274	RNF168	1349.76	-0.745845	0.0436249		-0.486179	0.0151894	0.363189	-0.483739	0.0218495		-0.400195	0.0505529		0.00242363	0.990974	1	0.0859982	0.680818	1	-0.083577	0.699665	1
ENSG00000138190		blue	-0.471462	0.00370108	EXOC6	609.01	0.803361	0.0870256		0.423251	0.0508844		0.330671	0.105943		0.521931	0.0147252		-0.0926094	0.64629	1	0.0987157	0.640685	1	-0.19133	0.33527	1
ENSG00000106261		blue	-0.469334	0.00388085	ZKSCAN1	2201.35	0.130111	0.217142	0.834015	0.342059	0.0465341	0.531763	0.112507	0.556075	0.907429	0.0631059	0.723408	0.973822	-0.22958	0.241384	1	-0.278987	0.130175	1	0.0494074	0.805138	1
ENSG00000198517		blue	0.469239	0.00388905	MAFK	1472.88	-0.18969	0.0734902	0.632893	-0.51177	0.00825517	0.283301	-0.166131	0.422469	0.851841	-0.207513	0.296659	0.866547	0.345704	0.101233	1	0.30431	0.13544	1	0.0413946	0.846577	1
ENSG00000121766		blue	-0.469132	0.00389827	ZCCHC17	673.736	0.750646	0.170894		0.329684	0.132435		0.335789	0.111258		0.472418	0.0300479		0.0061125	0.976704	1	0.14278	0.509965	1	-0.136671	0.509372	1
ENSG00000156990		blue	-0.465286	0.00424369	RPUSD3	692.247	1.44891	0.00161461		0.395646	0.0587968		0.82039	0.000136967		0.550977	0.00949386		0.424859	0.0505328	1	0.155368	0.471058	1	0.269497	0.217502	1
ENSG00000112576		blue	0.465159	0.00425557	CCND3	8109.85	-0.364327	0.0385929	0.508968	-0.177114	0.0966969	0.65371	-0.33119	0.0095777	0.280132	-0.235444	0.0368025	0.500581	-0.154088	0.244703	1	-0.0583333	0.621773	1	-0.0957551	0.484689	1
ENSG00000146192		blue	-0.464635	0.00430477	FGD2	13126.6	0.239904	0.136769	0.748146	0.16204	0.0740413	0.611853	0.224618	0.0412413	0.456546	0.133975	0.163747	0.769854	0.0625828	0.583589	1	-0.0280651	0.781253	1	0.0906483	0.443615	1
ENSG00000058799		blue	-0.464548	0.00431294	YIPF1	609.283	0.877153	0.14984		0.17878	0.408898		0.435563	0.0438266		0.406432	0.061917		0.256863	0.235934	1	0.227713	0.29876	1	0.0291515	0.892894	1
ENSG00000104872		blue	-0.464311	0.00433535	PIH1D1	1962.5	0.679604	0.0229024	0.416415	0.263029	0.104416	0.665827	0.527994	0.00386633	0.195101	0.361881	0.0319451	0.484745	0.265008	0.158287	1	0.0988638	0.571959	1	0.166146	0.38794	1
ENSG00000237441		blue	-0.463883	0.00437616	RGL2	4281.11	0.130973	0.138143	0.750906	0.215426	0.101437	0.660152	0.124568	0.418722	0.849402	0.305274	0.0272749	0.46674	-0.0908661	0.56801	1	0.0898551	0.533771	1	-0.180722	0.270602	1
ENSG00000168610		blue	0.463177	0.00444415	STAT3	5094.89	-0.327825	0.0687368	0.630021	-0.164941	0.0931317	0.64288	-0.30141	0.0110274	0.288352	-0.141518	0.173787	0.77564	-0.136478	0.267028	1	0.0234233	0.830202	1	-0.159902	0.209171	1
ENSG00000014138		blue	-0.462405	0.00451952	POLA2	557.375	0.905089	0.00690443		0.542643	0.011464		0.517923	0.0166122		0.724411	0.000818514		-0.0247181	0.909469	1	0.181816	0.405305	1	-0.206538	0.342661	1
ENSG00000105552		blue	-0.461944	0.00456506	BCAT2	624.296	0.672877	0.125936		0.276092	0.203492		0.355743	0.0993887		0.509967	0.0193629		0.0796789	0.712618	1	0.233938	0.286028	1	-0.154262	0.474917	1
ENSG00000213445		blue	-0.461702	0.00458914	SIPA1	7685.06	0.345163	0.0729441	0.632417	0.284827	0.0214282	0.403548	0.305178	0.0367802	0.442092	0.189226	0.146897	0.744136	0.0203575	0.892846	1	-0.0956055	0.483372	1	0.115964	0.457221	1
ENSG00000156030		blue	0.461137	0.00464581	ELMSAN1	5164.71	-0.200251	0.0317455	0.473576	-0.377832	0.00313878	0.192783	-0.181867	0.226451	0.710136	-0.110017	0.413733	0.917924	0.195976	0.207369	1	0.267832	0.0569382	1	-0.0718559	0.653983	1
ENSG00000135093		blue	0.460361	0.00472446	USP30	397.566	-1.56586	0.144834		-0.230365	0.289614		-0.438702	0.0332737		-0.16212	0.450917		-0.208448	0.3059	1	0.0682681	0.748412	1	-0.276727	0.167686	1
ENSG00000130517		blue	0.458518	0.00491614	PGPEP1	1279.16	-0.758376	0.0419163		-0.357366	0.0453444	0.52812	-0.5316	0.00680563		-0.200953	0.276595		-0.174284	0.386119	1	0.156435	0.411681	1	-0.330725	0.106811	1
ENSG00000185507		blue	-0.457987	0.00497266	IRF7	2078.42	0.548727	0.0556073	0.579444	0.427141	0.0143801	0.355449	0.417451	0.0307593	0.423532	0.333323	0.0653339	0.598446	-0.00968044	0.961009	1	-0.0938282	0.615481	1	0.0841493	0.677289	1
ENSG00000117318		blue	0.456132	0.00517418	ID3	211.822	-1.37701	0.189471		-0.363356	0.0374003		-0.267879	0.0823357		-0.265334	0.114519		0.0955239	0.519334	1	0.0980731	0.544107	1	-0.00254958	0.985742	1
ENSG00000160087		blue	-0.454425	0.00536598	UBE2J2	1416.93	0.264556	0.0463481	0.536561	0.455713	0.00515628	0.232769	0.223222	0.224159	0.708555	0.180303	0.287919	0.862843	-0.232513	0.217798	1	-0.275438	0.117275	1	0.0429255	0.82424	1
ENSG00000112667		blue	0.454193	0.00539249	DNPH1	485.554	-0.211576	0.130732		-0.260651	0.220474		-0.153455	0.437768		-0.462085	0.0269524		0.107239	0.580622	1	-0.201531	0.326281	1	0.30878	0.104358	1
ENSG00000163840		blue	-0.453975	0.00541748	DTX3L	1546.71	0.129145	0.00108773	0.097271	0.524713	0.000350109	0.0603461	0.139847	0.408034	0.847599	0.446463	0.00366673	0.241303	-0.384906	0.0271048	1	-0.0782537	0.624558	1	-0.306655	0.0867609	1
ENSG00000127993		blue	0.453802	0.00543741	RBM48	561.249	-0.118784	0.0747057		-0.455121	0.0379149		-0.149893	0.479767		-0.472446	0.0304291		0.305333	0.147695	1	-0.0173391	0.936486	1	0.322681	0.122603	1
ENSG00000168710		blue	-0.452993	0.00553147	AHCYL1	2883.51	0.338626	0.164988	0.777505	0.291546	0.0440843	0.525829	0.282524	0.0908699	0.577684	0.124223	0.412889	0.917416	-0.00901604	0.958261	1	-0.167337	0.289494	1	0.158323	0.371535	1
ENSG00000121858		blue	-0.452177	0.00562775	TNFSF10	1129.63	0.838777	0.0657054		0.526586	0.0135547	0.347173	0.462685	0.0322747		0.280019	0.19381		-0.0639008	0.768973	1	-0.246623	0.257611	1	0.182727	0.402186	1
ENSG00000147526		blue	0.452129	0.00563347	TACC1	5278.35	-0.525895	0.0117295	0.314485	-0.200228	0.0934131	0.644041	-0.46119	0.00111861	0.122805	-0.236945	0.0597827	0.575328	-0.260986	0.0747088	1	-0.0367186	0.780462	1	-0.22427	0.138101	1
ENSG00000123992		blue	-0.450966	0.00577325	DNPEP	2355.46	0.0312068	0.102995	0.69074	0.374286	0.0264979	0.453638	0.0576955	0.759575	0.959926	0.276678	0.114386	0.692567	-0.316636	0.101681	1	-0.0976167	0.590398	1	-0.219022	0.268327	1
ENSG00000092531		blue	-0.450514	0.0058284	SNAP23	3523.53	0.21673	0.149277	0.759063	0.223837	0.0940732	0.645462	0.194692	0.212663	0.697565	0.302206	0.0314608	0.484745	-0.0291455	0.85664	1	0.0783756	0.592993	1	-0.107522	0.517785	1
ENSG00000173559		blue	-0.449628	0.00593789	NABP1	832.262	0.218247	0.000756936		0.352666	0.0600641		0.212155	0.296042		0.762931	7.80284e-05		-0.140543	0.497598	1	0.410332	0.0387049	1	-0.550883	0.00892077	1
ENSG00000111335		blue	-0.449101	0.00600377	OAS2	3386.24	0.670269	0.101617	0.690409	0.260798	0.144479	0.71384	0.477959	0.0150126	0.317429	0.236557	0.20068	0.798331	0.217207	0.280221	1	-0.0242446	0.898823	1	0.241455	0.239184	1
ENSG00000163932		blue	-0.448571	0.00607072	PRKCD	7692.78	0.0543566	0.0464467	0.536561	0.206358	0.032779	0.489284	0.0514506	0.65957	0.934286	-0.078149	0.445536	0.918771	-0.154912	0.200865	1	-0.284517	0.00814912	1	0.129605	0.301561	1
ENSG00000267575		blue	-0.447161	0.00625189	CTC-459F4.3	78.6452	7.39483	1.71339e-05		0.226813	0.0723312		0.134106	0.217196		0.297486	0.0133837		-0.0927603	0.3688	1	0.0707082	0.535837	1	-0.163475	0.0963388	1
ENSG00000130935		blue	0.44606	0.00639652	NOL11	984.736	0.570572	0.0019498		-0.538055	0.00866635	0.288008	0.257261	0.227857		-0.236096	0.258078		0.795508	0.000232298	1	0.302024	0.155422	1	0.493493	0.0235766	1
ENSG00000133398		blue	0.445627	0.00645414	MED10	1120.13	-0.181138	0.0961412		-0.220444	0.237418	0.801599	-0.161925	0.423534		-0.486452	0.0114163		0.0585315	0.776945	1	-0.266058	0.178495	1	0.324594	0.122461	1
ENSG00000198911		blue	0.4453	0.00649803	SREBF2	5883.35	-0.250355	0.0762652	0.645143	-0.327033	0.0146872	0.355848	-0.224175	0.15215	0.639919	-0.256053	0.0690408	0.599836	0.102863	0.524669	1	0.0709836	0.629215	1	0.0318797	0.848255	1
ENSG00000176915		blue	0.445267	0.00650244	ANKLE2	3324.41	-0.1352	0.161038	0.775157	-0.288356	0.046542	0.531763	-0.128158	0.443219	0.858772	-0.272355	0.0727002	0.613837	0.160213	0.352591	1	0.0160005	0.91937	1	0.144214	0.41584	1
ENSG00000203667		blue	0.444978	0.00654144	COX20	979.393	-0.546844	0.046342		-0.52892	0.00881037	0.288008	-0.378289	0.0741619		-0.420815	0.0412138		0.150656	0.483405	1	0.108124	0.607248	1	0.0425323	0.844745	1
ENSG00000065243		blue	0.441407	0.0070401	PKN2	1460.19	-0.572584	0.140297	0.750906	-0.329644	0.0679351	0.603773	-0.410049	0.0383293	0.442906	-0.26193	0.160483	0.766122	-0.0804317	0.691276	1	0.0677229	0.724844	1	-0.148157	0.472916	1
ENSG00000160908		blue	0.440663	0.00714808	ZNF394	2020.1	-0.793595	0.0145743	0.347349	-0.163079	0.302768	0.847594	-0.596089	0.000901644	0.114606	-0.135165	0.412809	0.917416	-0.433085	0.0190411	1	0.0279176	0.870569	1	-0.461009	0.0149305	1
ENSG00000105643		blue	0.438074	0.00753458	ARRDC2	4225.61	-0.239494	0.0367005	0.498907	-0.326052	0.00864879	0.288008	-0.219682	0.133805	0.621263	-0.287809	0.0277963	0.46674	0.106375	0.482715	1	0.0382443	0.779832	1	0.0681312	0.663109	1
ENSG00000183506		blue	0.43802	0.00754291	PI4KAP2	793.207	-0.531732	0.0385268		-0.546817	0.00702625		-0.33907	0.110273		-0.0914622	0.658482		0.20778	0.3346	1	0.45545	0.030917	1	-0.247675	0.254709	1
ENSG00000277443		blue	-0.437227	0.00766493	MARCKS	1592.01	0.201009	0.0212165	0.398675	0.489395	0.00976893	0.305306	0.193385	0.343824	0.815069	0.511815	0.00863061	0.320485	-0.296065	0.155353	1	0.0224282	0.910768	1	-0.318498	0.132484	1
ENSG00000089486		blue	0.436638	0.00775672	CDIP1	683.159	-1.03829	0.1205		-0.369818	0.0876691		-0.494508	0.0220851		-0.334786	0.124161		-0.124752	0.564772	1	0.0350395	0.872977	1	-0.159796	0.460316	1
ENSG00000104518		blue	-0.435682	0.00790761	GSDMD	3371.84	0.435421	0.00613695	0.250708	0.480293	0.00166248	0.145087	0.371236	0.0333976	0.433201	0.452379	0.00458778	0.25037	-0.109064	0.543836	1	-0.0279147	0.866357	1	-0.0811497	0.660009	1
ENSG00000071655		blue	-0.435353	0.00796012	MBD3	2538.74	-0.0209086	0.0720251	0.631225	0.249889	0.0596654	0.566889	0.000757448	0.996107	0.998911	0.292859	0.0357465	0.498335	-0.249155	0.120237	1	0.0429745	0.767868	1	-0.292132	0.0771123	1
ENSG00000141994		blue	0.433269	0.00829971	DUS3L	1972.31	-0.0965917	0.223099	0.838112	-0.23641	0.173312	0.747659	-0.0999605	0.60363	0.914579	-0.354127	0.0491583	0.552273	0.136472	0.48925	1	-0.117736	0.526797	1	0.254211	0.207281	1
ENSG00000132780		blue	-0.432529	0.00842321	NASP	2211.63	0.408326	0.106585	0.69074	0.336948	0.0703766	0.604142	0.308341	0.127024	0.613869	0.446145	0.0200892	0.449497	-0.028608	0.889731	1	0.109216	0.580018	1	-0.137826	0.511421	1
ENSG00000254505		blue	0.430745	0.00872748	CHMP4A	492.069	-0.489336	0.080281		-0.48262	0.0125935		-0.338	0.102355		-0.168598	0.395725		0.144636	0.492616	1	0.314078	0.122878	1	-0.169444	0.428041	1
ENSG00000125656		blue	0.429129	0.00901107	CLPP	691.922	-0.294691	0.0737437		-0.541944	0.0133331		-0.214722	0.307026		-0.397895	0.0672707		0.327339	0.116459	1	0.144098	0.505087	1	0.183246	0.374165	1
ENSG00000145860		blue	-0.429001	0.00903381	RNF145	1895.96	0.582904	0.00582417	0.242188	0.451642	0.00315204	0.192783	0.481434	0.00586247	0.222327	0.429969	0.00714043	0.292712	0.0298036	0.868395	1	-0.0216737	0.896178	1	0.0514782	0.780428	1
ENSG00000115520		blue	0.427253	0.00935014	COQ10B	751.12	-0.140241	0.0714899		-0.392253	0.0663573		-0.153525	0.47753		-0.518337	0.0162889		0.238794	0.272314	1	-0.126127	0.562958	1	0.36493	0.0941588	1
ENSG00000150401		blue	0.427014	0.00939407	DCUN1D2	413.339	-0.699685	0.157312		-0.450365	0.0347056		-0.251517	0.205277		-0.110651	0.597454		0.198926	0.307667	1	0.339852	0.0991027	1	-0.140931	0.460873	1
ENSG00000108651		blue	-0.426853	0.00942386	UTP6	1905.67	0.049338	0.0329871	0.485721	0.336248	0.0479036	0.533003	0.0790167	0.676848	0.938901	0.460759	0.00903203	0.325954	-0.257273	0.185898	1	0.12453	0.49515	1	-0.381807	0.0548426	1
ENSG00000162775		blue	0.426263	0.00953339	RBM15	1163.75	-0.233776	0.0894886		-0.372176	0.0614496	0.575825	-0.200221	0.340983		-0.480375	0.0182924		0.171992	0.420828	1	-0.108227	0.603001	1	0.280224	0.194931	1
ENSG00000158417		blue	-0.425532	0.00967079	EIF5B	2917.61	0.46122	0.00521126	0.234038	0.321165	0.0121296	0.331019	0.394894	0.00868829	0.262718	-0.00738452	0.95631	0.994073	0.0737439	0.635383	1	-0.328572	0.0196343	1	0.402318	0.0121587	1
ENSG00000215021		blue	0.4255	0.00967679	PHB2	6200.72	-0.274698	0.0255004	0.433446	-0.142158	0.121972	0.68735	-0.257634	0.0208122	0.354511	-0.259871	0.00768189	0.301548	-0.115482	0.317971	1	-0.117717	0.250373	1	0.00223486	0.985121	1
ENSG00000237821		blue	0.42549	0.00967875	AC083873.4	182.351	-1.0216	0.128314		-0.337177	0.078848		-0.289153	0.0930537		-0.421618	0.0233456		0.048042	0.773166	1	-0.0844902	0.638957	1	0.132537	0.411373	1
ENSG00000197961		blue	0.425457	0.00968496	ZNF121	1810.87	-0.276218	0.00820222	0.277662	-0.517188	0.00232409	0.163203	-0.248074	0.190349	0.681451	-0.475781	0.00697615	0.29176	0.269149	0.166168	1	0.0414078	0.820493	1	0.227744	0.251845	1
ENSG00000185905		blue	-0.424621	0.00984427	C16orf54	1433.6	0.854175	0.00318063	0.180813	0.630565	0.00105093	0.118503	0.575436	0.00528116	0.205436	0.217782	0.270638	0.855503	-0.0551186	0.793129	1	-0.412851	0.0417018	1	0.357739	0.0935245	1
ENSG00000135148		blue	-0.419925	0.010781	TRAFD1	1211.61	0.936493	0.0492269		0.188275	0.347197	0.862363	0.571122	0.00678934		0.31511	0.123718		0.38294	0.0738616	1	0.12686	0.543985	1	0.256085	0.237185	1
ENSG00000099797		blue	-0.418438	0.0110928	TECR	908.13	0.800282	0.206389		0.184392	0.400345		0.345429	0.10325		0.431756	0.0478925		0.161096	0.444713	1	0.247442	0.255331	1	-0.0863476	0.679298	1
ENSG00000264112		blue	0.41706	0.0113887	RP11-159D12.2	654.145	-0.621999	0.030226		-0.420125	0.0493399		-0.390298	0.070972		-0.627026	0.00367001		0.0298291	0.890924	1	-0.206967	0.342619	1	0.236801	0.277333	1
ENSG00000105993		blue	0.416166	0.0115841	DNAJB6	1912.54	-0.492881	0.0118915	0.314485	-0.385047	0.0200133	0.399423	-0.399778	0.031479	0.42488	-0.517041	0.00267678	0.198325	-0.0147393	0.938456	1	-0.132013	0.459344	1	0.117275	0.548424	1
ENSG00000137449		blue	0.416161	0.0115852	CPEB2	1211.45	-0.76154	0.114828		-0.129941	0.526197	0.909108	-0.437242	0.0404402		-0.405606	0.0520869		-0.307388	0.154938	1	-0.275727	0.194711	1	-0.0316637	0.884513	1
ENSG00000158604		blue	0.414719	0.0119066	TMED4	2238.37	-0.49027	0.119709	0.714912	-0.165385	0.281181	0.832391	-0.390249	0.0259347	0.390768	-0.282122	0.0784765	0.624879	-0.224899	0.212527	1	-0.116749	0.483586	1	-0.108151	0.559239	1
ENSG00000163608		blue	0.414067	0.0120544	C3orf17	1419.66	-0.945025	0.0205729	0.393161	-0.316852	0.0850381	0.624931	-0.624427	0.0018431	0.142205	-0.187602	0.323024	0.884116	-0.307659	0.133236	1	0.129271	0.508322	1	-0.436937	0.0362006	1
ENSG00000125746		blue	-0.413899	0.0120927	EML2	1285.6	0.730842	0.0878977		0.250117	0.179077	0.755027	0.491316	0.015012		0.12503	0.514649		0.241254	0.242208	1	-0.125108	0.526077	1	0.366368	0.0808576	1
ENSG00000128284		blue	-0.413338	0.0122215	APOL3	2238.47	0.224535	0.268061	0.866332	0.155774	0.3776	0.875934	0.181204	0.352403	0.8171	0.359793	0.0490325	0.552273	0.0254334	0.898588	1	0.204048	0.279522	1	-0.178617	0.38044	1
ENSG00000114120		blue	0.413257	0.0122401	SLC25A36	2370.43	-0.474034	0.0874231	0.668455	-0.427975	0.0190509	0.392614	-0.354499	0.0754465	0.542478	-0.319385	0.0901637	0.658596	0.0734783	0.718562	1	0.108604	0.575902	1	-0.035127	0.86568	1
ENSG00000158481	Yes	blue	-0.412278	0.0124678	CD1C	14990.3	0.103247	0.0784845	0.653941	0.350199	0.0105852	0.317556	0.101032	0.526468	0.891391	0.154298	0.283424	0.861048	-0.249186	0.130196	1	-0.195914	0.191683	1	-0.0532729	0.753415	1
ENSG00000119314		blue	-0.411106	0.0127451	PTBP3	7588.15	0.0566972	0.183826	0.806214	0.102577	0.178983	0.755027	0.0563028	0.546938	0.90151	0.17188	0.0341055	0.489173	-0.0462752	0.633543	1	0.0693053	0.416736	1	-0.115581	0.251147	1
ENSG00000070882		blue	0.409813	0.0130571	OSBPL3	1250	-0.655087	0.00401128		-0.310792	0.0365115	0.500428	-0.514821	0.00257564		0.0353703	0.81999		-0.204069	0.246315	1	0.346195	0.0323811	1	-0.55027	0.00234079	1
ENSG00000159069		blue	-0.408482	0.0133849	FBXW5	3727.9	0.142167	0.0796222	0.658863	0.334542	0.0214374	0.403548	0.124378	0.458302	0.862256	-0.00423141	0.977842	0.996758	-0.21018	0.224096	1	-0.338802	0.0326907	1	0.128623	0.469398	1
ENSG00000159377		blue	-0.407564	0.013615	PSMB4	5392.72	0.0899042	0.240579	0.852311	0.212247	0.0428119	0.525829	0.0866622	0.490963	0.877069	0.120747	0.276076	0.859368	-0.12559	0.335377	1	-0.0915035	0.431219	1	-0.0340868	0.800524	1
ENSG00000110422		blue	-0.405916	0.0140364	HIPK3	5405.71	0.125887	0.149215	0.759063	0.282042	0.0377251	0.506086	0.120492	0.446454	0.858772	0.252991	0.0759693	0.61808	-0.161563	0.322783	1	-0.0290521	0.84515	1	-0.132512	0.431132	1
ENSG00000121671		blue	0.405044	0.0142638	CRY2	1130.08	-0.270259	0.0263124		-0.563378	0.00469331	0.226641	-0.199811	0.342288		-0.0316893	0.876417		0.363637	0.0889489	1	0.531794	0.0106709	1	-0.168159	0.436858	1
ENSG00000116539		blue	0.403867	0.0145759	ASH1L	2528.1	-0.59093	0.203541	0.818355	-0.215284	0.234275	0.796506	-0.397821	0.044812	0.46783	-0.0577131	0.757635	0.973822	-0.182585	0.36799	1	0.157595	0.413598	1	-0.340186	0.0997732	1
ENSG00000169446		blue	0.403792	0.0145959	MMGT1	1292.38	-0.441761	0.0999406		-0.202259	0.300099	0.845961	-0.310995	0.13492		-0.494843	0.0134373		-0.108761	0.607479	1	-0.292644	0.153495	1	0.183885	0.391585	1
ENSG00000105849		blue	0.403585	0.0146513	TWISTNB	762.621	-0.16585	0.0708465		-0.527181	0.0113754		-0.16235	0.449602		-0.344435	0.103483		0.36492	0.0927244	1	0.182786	0.395	1	0.182138	0.404468	1
ENSG00000126464		blue	0.402658	0.0149021	PRR12	2289.72	-0.151736	0.106163	0.69074	-0.212016	0.167189	0.746097	-0.141778	0.418404	0.849402	-0.393125	0.0142301	0.38829	0.0702476	0.696974	1	-0.181129	0.277205	1	0.251379	0.174673	1
ENSG00000131100		blue	-0.402057	0.0150668	ATP6V1E1	2137.02	0.115248	0.243376	0.852311	0.349172	0.045483	0.52812	0.107124	0.579472	0.913042	0.147051	0.416351	0.917971	-0.242081	0.221648	1	-0.202146	0.279387	1	-0.0399362	0.84348	1
ENSG00000116903		blue	0.401848	0.0151243	EXOC8	996.533	-0.119998	0.256048		-0.401119	0.0484267	0.533003	-0.115724	0.586068		-0.206649	0.318779		0.285458	0.18526	1	0.194509	0.357359	1	0.0909509	0.675914	1
ENSG00000197021		blue	0.401702	0.0151645	CXorf40B	722.042	-0.784935	0.122819		-0.26466	0.211159		-0.434863	0.0438718		-0.45294	0.034518		-0.170262	0.433849	1	-0.188331	0.385423	1	0.0180682	0.934075	1
ENSG00000174130	Yes	blue	-0.401559	0.0152042	TLR6	1305.49	0.70859	0.147959		0.336368	0.0913522	0.640668	0.441001	0.0360847		0.154935	0.447093		0.10467	0.624365	1	-0.181468	0.383543	1	0.286143	0.185821	1
ENSG00000237758		blue	-0.400922	0.0153815	BANF1P3	139.141	1.71816	0.162354		0.356378	0.0648127		0.357289	0.0393639		0.203495	0.276791		0.000916681	0.995647	1	-0.152948	0.399118	1	0.15387	0.344307	1
ENSG00000227766		blue	-0.399183	0.0158746	HCG4P5	28.2168	3.76738	6.23169e-08		0.690688	0.000864644		1.05473	3.10211e-08		0.182203	0.367898		0.364169	0.0508459	1	-0.508727	0.0102804	1	0.872924	1.5428e-06	0.0375131
ENSG00000159346		blue	0.399056	0.0159111	ADIPOR1	2787.88	0.0627936	0.0142417	0.343508	-0.329283	0.0173623	0.382777	0.0273543	0.864977	0.972556	-0.346286	0.0171397	0.421525	0.356673	0.0317269	1	-0.0170073	0.910636	1	0.373683	0.0288543	1
ENSG00000196954		blue	-0.3974	0.016394	CASP4	3479.53	0.248626	0.0879455	0.668455	0.261031	0.0229855	0.424486	0.227475	0.0960335	0.582855	0.230482	0.057222	0.566457	-0.0335554	0.812502	1	-0.0305501	0.809768	1	-0.00300516	0.9836	1
ENSG00000155252		blue	0.397396	0.0163951	PI4K2A	540.193	-1.26662	0.044217		-0.437815	0.0410408		-0.346669	0.08329		0.021597	0.918395		0.0911669	0.643184	1	0.459591	0.0268095	1	-0.368436	0.0563548	1
ENSG00000121058		blue	0.395529	0.0169541	COIL	610.538	-0.446453	0.182087		-0.482256	0.0272495		-0.252502	0.240179		-0.212411	0.331381		0.22982	0.284697	1	0.269927	0.218174	1	-0.0401074	0.851233	1
ENSG00000141580		blue	0.395197	0.0170552	WDR45B	2396.61	-0.465056	0.148217	0.757271	-0.185386	0.19449	0.76984	-0.378681	0.0219658	0.360172	-0.119972	0.423081	0.917971	-0.193324	0.256839	1	0.0654191	0.675069	1	-0.258746	0.140145	1
ENSG00000054118		blue	-0.39428	0.0173367	THRAP3	3735.17	0.3591	0.0950865	0.682162	0.0809591	0.518658	0.90783	0.31191	0.0348319	0.436463	0.251065	0.0573215	0.566457	0.230971	0.130686	1	0.170117	0.217946	1	0.0608551	0.699533	1
ENSG00000185122		blue	0.393074	0.0177131	HSF1	2576.65	-0.65048	0.00812284	0.277662	-0.145579	0.296573	0.84266	-0.536264	0.000932453	0.114606	-0.312427	0.0327801	0.485731	-0.390732	0.019434	1	-0.166861	0.274215	1	-0.223873	0.193355	1
ENSG00000188554		blue	-0.392999	0.0177367	NBR1	2749.3	-0.0025946	0.0512538	0.561417	0.325222	0.0352748	0.498112	0.0289945	0.869251	0.973425	0.352839	0.0287341	0.470245	-0.296265	0.102214	1	0.0276225	0.869102	1	-0.323891	0.0817188	1
ENSG00000124486		blue	-0.392488	0.0178986	USP9X	3419.38	-0.0422158	0.034916	0.496406	0.248133	0.13468	0.698286	0.00735206	0.968496	0.993513	0.446069	0.00971378	0.339393	-0.240821	0.207726	1	0.197962	0.267899	1	-0.438788	0.0249116	1
ENSG00000128928		blue	-0.392089	0.0180257	IVD	2494.84	0.592489	0.00720624	0.263738	0.252328	0.0574703	0.562636	0.505888	0.00112514	0.122805	0.315781	0.0236976	0.46674	0.253588	0.113914	1	0.0634576	0.663234	1	0.190132	0.250117	1
ENSG00000273136		blue	0.38875	0.0191196	NBPF26	1080.27	-0.371774	0.0571718		-0.538207	0.00644188	0.250969	-0.280697	0.180148		-0.32013	0.113493		0.257558	0.226498	1	0.218117	0.291872	1	0.0394417	0.854864	1
ENSG00000196313		blue	0.388625	0.0191615	POM121	2897	-0.501264	0.00627662	0.253949	-0.5909	0.000580459	0.0786591	-0.398558	0.0369288	0.442092	-0.32393	0.0690689	0.599836	0.19236	0.326137	1	0.267003	0.147325	1	-0.0746445	0.709241	1
ENSG00000131503		blue	0.387569	0.0195197	ANKHD1	412.099	-1.19357	0.145712		-0.156767	0.474515		-0.381516	0.0733762		0.0444685	0.838795		-0.22486	0.28925	1	0.201297	0.356374	1	-0.42617	0.0429567	1
ENSG00000178035		blue	-0.386352	0.0199391	IMPDH2	2408.62	0.117809	0.0117151	0.314485	0.339225	0.0225031	0.418293	0.124609	0.465573	0.86235	0.470852	0.00246731	0.198325	-0.214641	0.222472	1	0.131642	0.415918	1	-0.346286	0.0554302	1
ENSG00000196453		blue	0.385704	0.0201655	ZNF777	532.11	-1.00978	0.055632		-0.323875	0.117951		-0.564709	0.00840774		-0.403827	0.0551931		-0.24092	0.266405	1	-0.0799735	0.708802	1	-0.160951	0.461063	1
ENSG00000187554	Yes	blue	-0.385651	0.020184	TLR5	649.148	1.17326	0.136251		0.265093	0.225081		0.428964	0.0397132		0.0370788	0.86405		0.163936	0.427352	1	-0.228095	0.288514	1	0.392042	0.0545182	1
ENSG00000183826		blue	0.384803	0.0204835	BTBD9	682.557	-0.641046	0.0518081		-0.478424	0.0261858		-0.38893	0.0720572		-0.540939	0.0126111		0.0895111	0.680316	1	-0.0625399	0.774928	1	0.152054	0.484244	1
ENSG00000120137		blue	0.383736	0.0208658	PANK3	2146.56	-0.371781	0.0156675	0.35426	0.0470106	0.749465	0.960237	-0.3026	0.0740974	0.542039	-0.38872	0.0116804	0.355578	-0.349648	0.045245	1	-0.435771	0.00660876	1	0.0861224	0.631425	1
ENSG00000017797		blue	-0.382717	0.0212365	RALBP1	2336.18	0.466928	0.128748	0.739394	0.287325	0.0721022	0.605584	0.363191	0.0446009	0.46783	0.0923214	0.579359	0.954942	0.0758856	0.683178	1	-0.195025	0.259058	1	0.270914	0.155237	1
ENSG00000101782		blue	0.380046	0.0222343	RIOK3	2923.55	-0.229813	0.0912944	0.677699	-0.109825	0.45001	0.897431	-0.199717	0.233565	0.712964	-0.384352	0.0116148	0.355578	-0.0899014	0.603003	1	-0.274553	0.0834356	1	0.184653	0.29892	1
ENSG00000118579		blue	-0.379273	0.0225299	MED28	2284.8	0.18156	0.134716	0.747846	0.248421	0.0986439	0.65778	0.16461	0.339652	0.811936	0.351985	0.025231	0.46674	-0.0838197	0.636891	1	0.103576	0.526617	1	-0.187397	0.304211	1
ENSG00000186480		blue	0.378286	0.0229125	INSIG1	1838.14	0.00947736	0.0409602	0.511945	-0.292774	0.14595	0.71508	-0.0607486	0.773998	0.964173	-0.546022	0.00793152	0.305979	0.232082	0.279754	1	-0.253311	0.227542	1	0.485402	0.0253057	1
ENSG00000122705		blue	-0.377657	0.0231592	CLTA	2278.36	0.0816082	0.0843455	0.667624	0.306567	0.0161851	0.371849	0.0840788	0.575081	0.913042	0.224085	0.0949576	0.667874	-0.222505	0.151146	1	-0.0824866	0.55633	1	-0.14002	0.381194	1
ENSG00000118482		blue	0.376748	0.0235192	PHF3	2570.57	-0.115329	0.00189654	0.144362	-0.179543	0.130028	0.696003	-0.116154	0.409034	0.848204	-0.486304	0.000102053	0.044524	0.0633949	0.663278	1	-0.306781	0.0191957	1	0.370177	0.0138689	1
ENSG00000143756		blue	0.375396	0.0240638	FBXO28	903.012	-0.278774	0.0305971		-0.542846	0.00269971		-0.234674	0.23641		-0.278506	0.136284		0.308218	0.128543	1	0.264378	0.170156	1	0.0438407	0.831981	1
ENSG00000270231		blue	0.375374	0.0240726	NBPF8P	1256.6	-1.02571	0.0167336		-0.302755	0.109097	0.671428	-0.659871	0.00121759		-0.315387	0.104848		-0.357214	0.0861107	1	-0.0126342	0.949577	1	-0.344587	0.10327	1
ENSG00000196850		blue	0.374646	0.0243703	PPTC7	4161.38	-0.533099	0.0276923	0.442788	-0.184134	0.175123	0.74951	-0.448838	0.00459014	0.203306	-0.298271	0.0365167	0.500352	-0.264735	0.105419	1	-0.114146	0.443147	1	-0.150591	0.371276	1
ENSG00000160785		blue	0.374498	0.0244308	SLC25A44	969.656	-0.202324	0.141354		-0.244153	0.232037	0.795687	-0.170234	0.424226		-0.484503	0.0199603		0.0739376	0.731968	1	-0.24041	0.257039	1	0.314354	0.148996	1
ENSG00000163349		blue	0.374262	0.0245285	HIPK1	4459.96	-0.589289	0.0360269	0.496406	-0.221628	0.118864	0.682585	-0.482223	0.00337835	0.189136	-0.200668	0.178011	0.77564	-0.260631	0.124619	1	0.0209617	0.892607	1	-0.281596	0.106833	1
ENSG00000141905		blue	0.372517	0.0252575	NFIC	1135.49	-0.571514	0.00783256		-0.196238	0.240946	0.806178	-0.444408	0.0177446		-0.561025	0.00126396		-0.24821	0.197103	1	-0.364835	0.0428908	1	0.116626	0.553695	1
ENSG00000160688		blue	-0.372031	0.0254642	FLAD1	988.404	0.633501	0.1394		0.28088	0.159664	0.737776	0.409968	0.051673		0.422943	0.0383616		0.129123	0.546239	1	0.142092	0.49584	1	-0.0129688	0.952223	1
ENSG00000171763		blue	0.369263	0.0266658	SPATA5L1	426.139	-0.923464	0.0795838		-0.551005	0.0113826		-0.386875	0.0610377		-0.320594	0.136518		0.164183	0.421159	1	0.230497	0.279661	1	-0.0663167	0.741642	1
ENSG00000101052		blue	0.368658	0.0269343	IFT52	658.425	-0.64979	0.133539		-0.0821715	0.70722		-0.272251	0.193495		-0.464613	0.0322773		-0.190151	0.359489	1	-0.382586	0.0759159	1	0.192441	0.347907	1
ENSG00000147050		blue	0.368521	0.0269955	KDM6A	1742.42	-0.622319	0.195488	0.813872	-0.242558	0.195681	0.771238	-0.419738	0.0386188	0.442906	-0.278287	0.149499	0.745824	-0.177227	0.392288	1	-0.0357356	0.857118	1	-0.141495	0.501768	1
ENSG00000006282		blue	0.367679	0.027374	SPATA20	2040.9	-0.729515	0.0440626	0.522124	-0.299099	0.127042	0.693345	-0.481368	0.0209779	0.354511	-0.505773	0.0118259	0.357572	-0.18232	0.39017	1	-0.206717	0.314926	1	0.024397	0.909651	1
ENSG00000160551		blue	0.36757	0.0274232	TAOK1	3703.91	-0.44743	0.0866869	0.667624	-0.107586	0.42947	0.891049	-0.37482	0.0181995	0.339344	-0.253373	0.0764485	0.61808	-0.267264	0.10291	1	-0.145797	0.32854	1	-0.121468	0.471781	1
ENSG00000113532		blue	-0.367357	0.0275201	ST8SIA4	1073.84	0.410621	0.245198		0.392414	0.0475893	0.533003	0.281974	0.178857		0.24699	0.223195		-0.110454	0.604414	1	-0.145448	0.482993	1	0.0349951	0.871199	1
ENSG00000181904		blue	0.367132	0.0276225	C5orf24	1052.06	-0.559624	0.0261579		-0.444985	0.0248858	0.436884	-0.339686	0.10561		0.0914911	0.652185		0.105301	0.621641	1	0.536578	0.00973761	1	-0.431285	0.0458035	1
ENSG00000159479		blue	-0.367047	0.027661	MED8	850.086	0.788155	0.0387657		0.0147056	0.938004		0.500881	0.0140861		0.0262583	0.892647		0.486275	0.0194787	1	0.011552	0.953909	1	0.474731	0.0248063	1
ENSG00000108100		blue	0.367012	0.0276772	CCNY	5032.06	-0.214908	0.0672023	0.623566	-0.301236	0.0195674	0.396083	-0.187637	0.215551	0.698467	0.00845414	0.950339	0.994027	0.113603	0.468178	1	0.309711	0.0289981	1	-0.196109	0.224565	1
ENSG00000167208		blue	-0.366149	0.0280731	SNX20	3264.84	0.303839	0.0633299	0.602573	0.205197	0.0707877	0.604142	0.269035	0.0468168	0.471859	-0.0188334	0.875246	0.990065	0.0638463	0.648596	1	-0.224042	0.0745275	1	0.28789	0.0468469	1
ENSG00000105248		blue	0.365391	0.0284245	CCDC94	1097.79	-0.528088	0.0915586		-0.406503	0.0242713	0.432774	-0.38873	0.0494471		-0.285107	0.126316		0.0177633	0.93008	1	0.121412	0.527756	1	-0.10365	0.615421	1
ENSG00000153147		blue	-0.365098	0.0285618	SMARCA5	3116	0.200842	0.0958936	0.683725	0.403795	0.0143646	0.355449	0.178637	0.335177	0.80684	0.274612	0.109563	0.689368	-0.225184	0.236865	1	-0.129194	0.467451	1	-0.0959902	0.622369	1
ENSG00000213465		blue	-0.364892	0.0286582	ARL2	449.625	0.962751	0.0786971		0.236114	0.254529		0.539987	0.0117524		0.152683	0.468616		0.303957	0.160876	1	-0.0834508	0.696776	1	0.387416	0.0760377	1
ENSG00000204564		blue	-0.364065	0.0290488	C6orf136	302.392	1.57037	0.175515		0.21735	0.247355		0.30204	0.0720318		0.370414	0.0415879		0.0847297	0.601583	1	0.153129	0.383673	1	-0.0684017	0.662778	1
ENSG00000278259		blue	0.363072	0.0295233	MYO19	1101.01	-0.396989	0.0456117		-0.609585	0.0042769	0.217205	-0.27161	0.208822		-0.273534	0.20443		0.338064	0.120203	1	0.336139	0.12292	1	0.00192465	0.992959	1
ENSG00000128309		blue	0.36132	0.030376	MPST	1237.56	-0.3137	0.036884		-0.462272	0.00553	0.238018	-0.26608	0.15424		-0.344036	0.0470229		0.196214	0.306292	1	0.118248	0.509921	1	0.0779674	0.691174	1
ENSG00000100056		blue	0.36034	0.0308621	DGCR14	814.791	-0.494125	0.0471933		-0.442189	0.0257774		-0.356665	0.0892602		-0.50919	0.0121248		0.0855352	0.688479	1	-0.0670203	0.746794	1	0.152558	0.479914	1
ENSG00000269937		blue	0.358177	0.0319566	RP11-20I23.8	7.5141	-3.24246	0.00818011		-0.156942	0.24023		-0.213027	0.0646673		-0.255563	0.0449245		-0.056121	0.608632	1	-0.0986808	0.415236	1	0.0425616	0.683725	1
ENSG00000006459		blue	0.358145	0.0319728	KDM7A	4988.21	-0.101276	0.178748	0.795595	-0.282795	0.0281032	0.460673	-0.0976171	0.518668	0.888032	-0.15336	0.257727	0.84769	0.185191	0.236179	1	0.129444	0.360621	1	0.0557482	0.729503	1
ENSG00000100897		blue	0.357103	0.0325118	DCAF11	3076.77	-0.00187194	0.114817	0.70636	-0.187167	0.0763817	0.613808	-0.00992794	0.937547	0.987238	-0.221125	0.0478018	0.551322	0.17725	0.177079	1	-0.03396	0.771977	1	0.211211	0.120073	1
ENSG00000138380		blue	-0.356903	0.0326162	CARF	494.519	1.4797	0.141828		0.294942	0.169186		0.477675	0.0172376		0.253355	0.230033		0.182807	0.354084	1	-0.0416023	0.841412	1	0.224416	0.246308	1
ENSG00000197535		blue	0.354114	0.0340986	MYO5A	4675.34	-0.313835	0.10455	0.69074	-0.29424	0.0268934	0.454267	-0.26983	0.0826656	0.554542	-0.085708	0.53963	0.949333	0.024406	0.879225	1	0.208547	0.152899	1	-0.184143	0.265921	1
ENSG00000163960		blue	0.35343	0.0344706	UBXN7	1974.24	0.191866	0.0937319	0.678951	-0.18704	0.264176	0.824264	0.110747	0.554761	0.906704	-0.330446	0.0577217	0.566457	0.297835	0.121797	1	-0.143428	0.426287	1	0.441268	0.0250578	1
ENSG00000136603		blue	0.352182	0.0351576	SKIL	1211.48	-0.485048	0.133981		-0.401566	0.0342828	0.490666	-0.347813	0.0889535		-0.319464	0.101641		0.0537533	0.796632	1	0.0821135	0.682043	1	-0.0283611	0.893528	1
ENSG00000153071		blue	-0.351444	0.0355694	DAB2	910.312	0.55681	0.0212874		0.443198	0.0314119		0.377591	0.0773766		0.636197	0.00240364		-0.0656174	0.761739	1	0.193043	0.36538	1	-0.258664	0.235765	1
ENSG00000146833		blue	-0.350048	0.0363586	TRIM4	947.262	0.699013	0.0397391		0.449077	0.0198385		0.461132	0.0255539		0.108866	0.58246		0.0120749	0.954228	1	-0.340269	0.0937225	1	0.35235	0.0988388	1
ENSG00000276550		blue	-0.349762	0.0365223	HERC2P2	1563.61	0.985376	0.0802205	0.658863	0.389256	0.069965	0.604142	0.499968	0.0207693	0.354511	0.132061	0.54205	0.949333	0.110758	0.610336	1	-0.257261	0.239175	1	0.368027	0.0907405	1
ENSG00000247077		blue	-0.34934	0.0367642	PGAM5	884.915	0.705429	0.0558909		0.273427	0.174687		0.451264	0.0329627		0.521003	0.0113213		0.177883	0.407473	1	0.247627	0.238212	1	-0.0697442	0.747935	1
ENSG00000116793		blue	-0.348514	0.0372419	PHTF1	438.961	0.286894	0.0773124		0.509127	0.0192896		0.19926	0.33387		0.429832	0.0456992		-0.309977	0.128154	1	-0.079315	0.709557	1	-0.230668	0.250513	1
ENSG00000126768		blue	-0.348193	0.0374292	TIMM17B	980.731	0.0377451	0.047948		0.442604	0.025422	0.440854	0.0941951	0.653356		0.449043	0.0267537		-0.348486	0.10212	1	0.00644541	0.975195	1	-0.354938	0.100049	1
ENSG00000144136		blue	0.347732	0.0376993	SLC20A1	1688.98	-0.803591	0.129062	0.740255	-0.290243	0.1436	0.71384	-0.490145	0.0195745	0.347552	-0.274063	0.177186	0.77564	-0.199966	0.348732	1	0.0161825	0.937883	1	-0.216154	0.316944	1
ENSG00000129355		blue	0.346818	0.0382391	CDKN2D	2244.91	-0.264148	0.066803	0.621143	-0.356952	0.0295421	0.469372	-0.229238	0.214199	0.697565	-0.398735	0.0195098	0.44544	0.127729	0.500564	1	-0.0417914	0.813302	1	0.169522	0.382653	1
ENSG00000100296		blue	-0.345969	0.0387467	THOC5	823.178	0.759975	0.148678		0.153243	0.462932		0.431307	0.0447587		0.383065	0.0706908		0.278139	0.200254	1	0.229875	0.285397	1	0.0482658	0.825179	1
ENSG00000157873	Yes	blue	0.344098	0.0398839	TNFRSF14	5611.86	-0.00301477	0.117791	0.710177	-0.25485	0.0342238	0.490666	-0.0144066	0.919486	0.98543	-0.194429	0.125488	0.708656	0.240461	0.102974	1	0.0604232	0.649108	1	0.180039	0.237086	1
ENSG00000169764		blue	-0.343744	0.0401016	UGP2	1807.62	0.641003	0.107143	0.69074	0.275137	0.132031	0.697184	0.440603	0.0272111	0.401905	0.0767246	0.684184	0.973822	0.165507	0.417092	1	-0.198444	0.306996	1	0.363956	0.0797822	1
ENSG00000170004		blue	0.34298	0.0405759	CHD3	9098.27	-0.297286	0.0435624	0.521703	-0.112049	0.167128	0.746097	-0.280449	0.0046375	0.203306	-0.118147	0.170258	0.77564	-0.168407	0.101531	1	-0.00609805	0.946342	1	-0.162309	0.128141	1
ENSG00000160271		blue	0.342696	0.0407532	RALGDS	2195.23	-0.595771	0.047236	0.539611	-0.350191	0.029886	0.472199	-0.461249	0.0113475	0.288352	-0.211167	0.208752	0.806008	-0.111086	0.553098	1	0.139038	0.424971	1	-0.250128	0.19245	1
ENSG00000011009		blue	-0.341832	0.0412967	LYPLA2	1384.86	0.0989073	0.072385	0.631225	0.162739	0.353782	0.865511	0.103636	0.593284	0.913042	0.459816	0.0114201	0.35444	-0.0591167	0.766166	1	0.297119	0.113444	1	-0.35624	0.0791388	1
ENSG00000169118		blue	0.341783	0.0413276	CSNK1G1	576.685	0.337455	0.107568		-0.248472	0.24347		0.0167312	0.932733		-0.390491	0.0620151		0.265309	0.172816	1	-0.142091	0.489779	1	0.407413	0.032633	1
ENSG00000108405	Yes	blue	0.340614	0.042073	P2RX1	1540.86	-0.741982	0.214327	0.832565	-0.0960849	0.623596	0.930608	-0.43244	0.0379803	0.442906	-0.100163	0.617738	0.966903	-0.336447	0.112597	1	-0.00407798	0.984168	1	-0.332377	0.121927	1
ENSG00000063978		blue	0.339936	0.0425104	RNF4	2961.5	-0.12787	0.0508472	0.559693	-0.416857	0.00545452	0.236834	-0.121384	0.480293	0.872102	-0.129725	0.408231	0.917416	0.295501	0.0953706	1	0.287157	0.0784882	1	0.00834427	0.963434	1
ENSG00000127884		blue	-0.339804	0.0425955	ECHS1	1923.05	0.225086	0.0719316	0.631225	0.441445	0.0106829	0.317806	0.185893	0.332921	0.805246	0.115618	0.519157	0.949333	-0.255581	0.194053	1	-0.325867	0.0787172	1	0.0702867	0.726661	1
ENSG00000134255		blue	-0.339656	0.0426919	CEPT1	1412.73	0.0420906	0.171996	0.787253	0.414242	0.0364491	0.500428	0.0745306	0.722309	0.951887	0.216294	0.285976	0.862525	-0.33978	0.110964	1	-0.19798	0.339539	1	-0.141803	0.511148	1
ENSG00000072135		blue	-0.338827	0.0432331	PTPN18	7507.57	0.318288	0.179858	0.798685	0.14028	0.220151	0.786253	0.281197	0.0389955	0.442906	0.0508551	0.673759	0.971535	0.140931	0.317632	1	-0.0894293	0.479628	1	0.230361	0.113996	1
ENSG00000197114		blue	0.33689	0.0445198	ZGPAT	592.408	0.275394	0.11598		-0.124703	0.556768		0.0858037	0.691067		-0.414171	0.0537064		0.21057	0.333158	1	-0.289552	0.18268	1	0.500134	0.0219969	1
ENSG00000156875		blue	0.336539	0.0447558	HIAT1	1760.37	-0.3564	0.0695786	0.630501	-0.220235	0.154332	0.724535	-0.297202	0.0917644	0.580828	-0.412339	0.0106693	0.343489	-0.0769795	0.67137	1	-0.192126	0.25226	1	0.115147	0.536372	1
ENSG00000089351		blue	-0.336142	0.0450249	GRAMD1A	2472.4	0.00327335	0.0347622	0.496406	0.460399	0.00766127	0.279342	0.0356358	0.852588	0.971472	0.113985	0.52447	0.949333	-0.424823	0.0307072	1	-0.346455	0.0612384	1	-0.0783695	0.69643	1
ENSG00000086232		blue	0.33505	0.0457702	EIF2AK1	3858.31	-0.206806	0.00709124	0.263738	-0.155178	0.102323	0.662133	-0.196408	0.0874764	0.566724	-0.347676	0.000555752	0.0943498	-0.0412319	0.729452	1	-0.192506	0.0687376	1	0.151274	0.220704	1
ENSG00000182831		blue	0.333472	0.0468647	C16orf72	2807.4	-0.065157	0.142135	0.750906	-0.330767	0.0277148	0.459598	-0.0730308	0.671507	0.938876	-0.21707	0.167124	0.774218	0.257763	0.146267	1	0.113706	0.486672	1	0.144059	0.429264	1
ENSG00000185813		blue	0.333345	0.0469535	PCYT2	671.829	-0.690986	0.108509		-0.332072	0.117766		-0.402067	0.0625872		-0.489767	0.0225669		-0.0700241	0.747578	1	-0.157742	0.467971	1	0.0877187	0.687859	1
ENSG00000065613		blue	0.331533	0.0482386	SLK	2365.71	-0.726123	0.00868568	0.288944	-0.221563	0.125263	0.691763	-0.583484	0.000471924	0.103926	-0.17715	0.241983	0.83424	-0.361974	0.0354378	1	0.0444176	0.778223	1	-0.406396	0.021661	1
ENSG00000138434		blue	-0.331399	0.0483348	SSFA2	3178.3	0.413825	0.0238176	0.421663	0.339147	0.0193246	0.39539	0.354134	0.03423	0.436463	0.410898	0.00681464	0.290589	0.0149932	0.93071	1	0.0717593	0.649975	1	-0.0567663	0.748861	1
ENSG00000135945		blue	0.326797	0.0517304	REV1	1396.37	-0.647076	0.0223623	0.413425	-0.0340211	0.848614	0.976608	-0.454736	0.0204647	0.353589	-0.438193	0.017513	0.427075	-0.420793	0.0361643	1	-0.404231	0.0336394	1	-0.0165633	0.935567	1
ENSG00000211625		blue	0.324543	0.053462	IGKV3D-20	20.4191	-4.64867	0.00256879		0.0287152	0.800049		-0.0588009	0.54497		-0.063592	0.55526		-0.0875642	0.341476	1	-0.0923574	0.365811	1	0.00479338	0.956306	1
ENSG00000187605		blue	0.322966	0.0547004	TET3	5172.51	-0.419144	0.156451	0.772168	-0.0595411	0.647966	0.933364	-0.350349	0.0219725	0.360172	-0.077602	0.57154	0.952567	-0.290839	0.0657025	1	-0.0180615	0.899678	1	-0.27278	0.0940879	1
ENSG00000092871		blue	-0.322788	0.0548414	RFFL	727.449	0.149066	0.24341		0.25288	0.195179		0.09458	0.649397		-0.153573	0.443081		-0.158321	0.454617	1	-0.406528	0.0474096	1	0.248211	0.247528	1
ENSG00000187608		blue	-0.321865	0.0555787	ISG15	656.354	1.29206	0.103555		0.36856	0.0917112		0.487284	0.0195127		0.164701	0.44701		0.118775	0.565395	1	-0.203927	0.342787	1	0.322711	0.113664	1
ENSG00000133872		blue	0.320127	0.0569879	SARAF	11556	-0.226726	0.244601	0.852311	-0.0957375	0.268889	0.829516	-0.211872	0.0443441	0.46783	-0.0640183	0.486036	0.937532	-0.11614	0.288206	1	0.0317201	0.74262	1	-0.147861	0.192162	1
ENSG00000169612		blue	0.319863	0.0572038	FAM103A1	301.848	0.408462	0.115351		-0.369209	0.0744238		0.0442715	0.815605		-0.0513002	0.799759		0.413666	0.0256736	1	0.318053	0.107705	1	0.0956166	0.597006	1
ENSG00000138463	Yes	blue	-0.319057	0.0578688	DIRC2	248.835	1.7821	0.130553		0.304929	0.132563		0.442421	0.0165383		0.291612	0.139917		0.137552	0.444223	1	-0.0133219	0.94485	1	0.150879	0.388377	1
ENSG00000085982		blue	-0.318814	0.0580706	USP40	795.242	0.871827	0.190246		0.195854	0.354514		0.466471	0.0306176		0.255465	0.232909		0.270696	0.213396	1	0.059625	0.783391	1	0.211076	0.333927	1
ENSG00000142453		blue	-0.317655	0.0590405	CARM1	1669.23	-0.0316314	0.163281	0.776425	0.247815	0.200509	0.772828	0.0311324	0.880468	0.975271	0.393381	0.0477388	0.551322	-0.216733	0.303978	1	0.145594	0.474713	1	-0.362333	0.090225	1
ENSG00000132471		blue	0.316431	0.0600785	WBP2	2846.89	-0.534732	0.0863133	0.667624	-0.28981	0.0631175	0.585238	-0.419498	0.0180827	0.339344	-0.152897	0.347545	0.898997	-0.129717	0.477527	1	0.136927	0.418047	1	-0.266647	0.154691	1
ENSG00000213225		blue	-0.315626	0.0607691	AC018804.7	11.7577	1.43647	0.000917032		0.43987	0.00144145		0.125982	0.290801		0.191995	0.144939		-0.314054	0.00572737	1	-0.247997	0.0481821	1	-0.0660603	0.542231	1
ENSG00000099282	Yes	blue	0.314785	0.0614967	TSPAN15	104.595	-24.4399	0.0173473		-0.104704	0.370326		-0.130696	0.192633		-0.0761723	0.493416		-0.0260092	0.784494	1	0.0285469	0.786548	1	-0.0545585	0.546444	1
ENSG00000160799		blue	0.313904	0.0622671	CCDC12	1735.55	-0.563977	0.0497759	0.557466	0.0320769	0.84508	0.976608	-0.41512	0.0246317	0.380909	-0.274644	0.107995	0.689261	-0.447266	0.0184291	1	-0.306756	0.0832298	1	-0.140513	0.469668	1
ENSG00000163479		blue	0.313471	0.0626485	SSR2	5680.67	-0.522469	0.0139743	0.341079	-0.213277	0.0761343	0.613808	-0.453477	0.00145704	0.130054	-0.0893065	0.481197	0.935429	-0.240225	0.103153	1	0.123978	0.350088	1	-0.364205	0.0167157	1
ENSG00000127314		blue	-0.310097	0.0656822	RAP1B	2465.51	0.210493	0.141502	0.750906	0.0214041	0.895211	0.984677	0.171503	0.349286	0.816474	0.353752	0.0365494	0.500352	0.150118	0.425338	1	0.332386	0.0581438	1	-0.18227	0.344685	1
ENSG00000161970		blue	0.309617	0.0661227	RPL26	9232.67	-0.0445184	0.251729	0.854116	-0.157098	0.0442788	0.526899	-0.0442441	0.643243	0.929453	-0.0628017	0.449188	0.919085	0.112856	0.255278	1	0.094298	0.280116	1	0.0185585	0.856906	1
ENSG00000141101		blue	0.307135	0.0684406	NOB1	1338.19	-0.159905	0.146698		-0.378247	0.0440857	0.525829	-0.150105	0.460127		-0.355233	0.0663375		0.228183	0.271308	1	0.0230141	0.907865	1	0.205172	0.330586	1
ENSG00000184924		blue	-0.306152	0.0693749	PTRHD1	1289.09	-0.0697406	0.129851		0.377931	0.0363222	0.500244	-0.0117605	0.952626		0.135121	0.469037		-0.389756	0.0542515	1	-0.242841	0.206741	1	-0.146918	0.476571	1
ENSG00000196684		blue	0.305792	0.0697199	HSH2D	3686.08	0.144864	0.0420681	0.513307	-0.339797	0.0194721	0.395562	0.0952584	0.569922	0.911508	-0.153003	0.31511	0.876449	0.435102	0.0118401	1	0.186808	0.238928	1	0.248296	0.162451	1
ENSG00000177409		blue	-0.304489	0.0709802	SAMD9L	3452.01	0.777136	0.0553185	0.579444	0.362348	0.0611579	0.574985	0.501911	0.0153108	0.318159	0.112129	0.572468	0.953131	0.139605	0.5078	1	-0.250265	0.219075	1	0.389877	0.068264	1
ENSG00000220583		blue	-0.303948	0.0715087	RPL35P2	63.7932	1.79992	0.0266664		0.472307	0.0260005		0.552693	0.00500543		0.491144	0.0183339		0.0804239	0.677313	1	0.0188456	0.926618	1	0.0615806	0.744855	1
ENSG00000117419		blue	0.303917	0.0715388	ERI3	1000.78	-0.521631	0.0962002		-0.281786	0.114786	0.681252	-0.355654	0.0703465		0.0541399	0.769539		-0.073898	0.713383	1	0.335974	0.0780243	1	-0.409878	0.0457139	1
ENSG00000139637		blue	-0.301107	0.0743327	C12orf10	1150.02	0.266294	0.0139879		0.455616	0.00919239	0.297081	0.237429	0.220044		0.527923	0.00357997		-0.21822	0.271204	1	0.0723203	0.699174	1	-0.290543	0.151326	1
ENSG00000217027		blue	-0.300645	0.0748005	TPT1P4	13.1733	4.62121	0.00541662		0.164539	0.272328		0.411394	0.00160993		0.287937	0.0448005		0.246977	0.0473902	1	0.123462	0.367616	1	0.12352	0.300052	1
ENSG00000183011		blue	-0.300502	0.0749457	NAA38	1041.97	0.221377	0.0188169		0.430177	0.0143812	0.355449	0.168274	0.386381		-0.109895	0.546224		-0.261931	0.188034	1	-0.540145	0.00406462	1	0.278218	0.170831	1
ENSG00000100105		blue	0.300336	0.0751147	PATZ1	1323.04	-0.244747	0.0885074		-0.454322	0.0169653	0.380576	-0.184145	0.368723		-0.0342772	0.860941		0.270221	0.195886	1	0.420116	0.0365271	1	-0.149898	0.479924	1
ENSG00000039319		blue	-0.299143	0.0763364	ZFYVE16	1076.9	0.520915	0.112298		0.0250899	0.90489	0.985007	0.297542	0.167008		0.438178	0.0395911		0.272523	0.209956	1	0.413184	0.0557161	1	-0.140663	0.5198	1
ENSG00000126264		blue	0.299122	0.0763581	HCST	974.453	0.00320584	0.197635		-0.412403	0.0453452	0.52812	-0.0410818	0.84764		-0.0867911	0.678921		0.371409	0.0861877	1	0.325683	0.126891	1	0.0457267	0.833998	1
ENSG00000110046		blue	-0.299078	0.0764038	ATG2A	1464.79	0.816672	0.0571021	0.584086	0.28983	0.124279	0.691681	0.54854	0.00708142	0.241903	0.257386	0.184833	0.779739	0.25877	0.213099	1	-0.032449	0.870738	1	0.291224	0.168009	1
ENSG00000172465		blue	-0.297374	0.0781763	TCEAL1	249.011	1.4194	0.140597		0.140279	0.431387		0.237005	0.133445		0.389488	0.0234685		0.0967723	0.524506	1	0.24932	0.132077	1	-0.152553	0.297746	1
ENSG00000169221		blue	-0.297071	0.0784953	TBC1D10B	1880.23	-0.262488	0.101314	0.690409	0.260928	0.132613	0.697184	-0.145776	0.448826	0.858772	0.252723	0.160057	0.766122	-0.406775	0.0392109	1	-0.00820246	0.964802	1	-0.398579	0.0479215	1
ENSG00000122557		blue	-0.296976	0.078595	HERPUD2	1273.43	-0.291451	0.0356999		0.385641	0.0431562	0.525829	-0.116324	0.57075		0.325215	0.0972024		-0.502073	0.0163833	1	-0.0604312	0.76396	1	-0.44165	0.0376105	1
ENSG00000111860		blue	0.29309	0.0827758	CEP85L	1174.56	-0.863909	0.147001		-0.146335	0.465329	0.900242	-0.479793	0.0230196		-0.102593	0.616475		-0.333561	0.119621	1	0.0437518	0.834336	1	-0.377321	0.0816608	1
ENSG00000233476		blue	0.291734	0.0842734	EEF1A1P6	8433.52	-0.11007	0.202018	0.818355	-0.233209	0.034031	0.490666	-0.10498	0.424699	0.85294	-0.141081	0.22495	0.820623	0.128234	0.346494	1	0.0921317	0.449603	1	0.0361028	0.79771	1
ENSG00000158966	Yes	blue	0.291507	0.0845263	CACHD1	57.4825	-11.1968	0.030364		-0.0779121	0.491468		-0.118343	0.22289		-0.0810219	0.451936		-0.0404553	0.660116	1	-0.00311179	0.97567	1	-0.0373453	0.669374	1
ENSG00000235084		blue	0.290676	0.0854579	CHCHD2P6	133.701	-1.26187	0.0935055		-0.448292	0.0403471		-0.447006	0.03241		-0.184956	0.39365		0.00126305	0.995131	1	0.263428	0.221026	1	-0.262174	0.199715	1
ENSG00000162521		blue	-0.289622	0.0866499	RBBP4	4416.38	0.0156772	0.0569609	0.584086	0.19389	0.118607	0.682585	0.0280989	0.848006	0.971472	0.325927	0.0127512	0.375405	-0.165806	0.274065	1	0.132046	0.334515	1	-0.297854	0.0569195	1
ENSG00000198363		blue	0.284556	0.0925578	ASPH	986.793	-0.833464	0.229403		-0.120401	0.564597	0.916236	-0.430692	0.0451497		-0.248933	0.240647		-0.310391	0.152999	1	-0.128562	0.550539	1	-0.181835	0.40534	1
ENSG00000227008		blue	0.283297	0.0940727	RP3-417G15.1	829.718	-0.442831	0.0101446		-0.691936	0.000685745		-0.318248	0.134741		-0.249617	0.229519		0.373767	0.0831289	1	0.442415	0.0366714	1	-0.0686488	0.752509	1
ENSG00000107651		blue	-0.280817	0.0971135	SEC23IP	1372.02	0.853939	0.0557981	0.580068	0.202653	0.322968	0.854132	0.509831	0.0168783	0.331273	0.460441	0.0274547	0.46674	0.307257	0.155117	1	0.257843	0.225245	1	0.0494155	0.820664	1
ENSG00000138801		blue	-0.278589	0.0999084	PAPSS1	1716.86	0.218774	0.121536	0.720079	0.0587512	0.752014	0.961658	0.17	0.399695	0.843936	0.426694	0.0259762	0.46674	0.111267	0.589395	1	0.368002	0.0619144	1	-0.256738	0.220893	1
ENSG00000228205		blue	-0.278386	0.100165	RP11-778D9.4	341.866	-0.332016	0.206367		0.297133	0.144325		-0.142242	0.503657		0.0165183	0.936574		-0.439482	0.0414991	1	-0.280668	0.184576	1	-0.158818	0.465585	1
ENSG00000136448		blue	-0.277833	0.100871	NMT1	2932.18	0.301051	0.0286424	0.447119	0.362717	0.0289496	0.466474	0.22797	0.221089	0.705005	-0.119139	0.49035	0.937532	-0.134752	0.481179	1	-0.481914	0.00706233	1	0.347166	0.0762397	1
ENSG00000206228		blue	-0.277419	0.1014	HNRNPA1P4	21.1321	2.4816	0.0895106		0.2688	0.114923		0.333572	0.0262921		0.312754	0.056553		0.0648031	0.653227	1	0.0439743	0.780241	1	0.0208297	0.880591	1
ENSG00000128609		blue	0.274285	0.10548	NDUFA5	1258.74	-0.069066	0.230872		-0.414403	0.0445236	0.527187	-0.086769	0.685018		-0.171304	0.414325		0.327711	0.130139	1	0.243152	0.254756	1	0.0845614	0.698385	1
ENSG00000070495		blue	0.270243	0.110924	JMJD6	1030.85	-0.930956	0.109108		-0.148872	0.458335	0.898768	-0.51858	0.0140938		-0.164495	0.422576		-0.36982	0.0846337	1	-0.0156254	0.940529	1	-0.354203	0.102337	1
ENSG00000142186		blue	-0.270128	0.111082	SCYL1	2209.26	0.166752	0.0235266	0.421654	0.331532	0.0345006	0.491828	0.161373	0.365262	0.82371	0.470828	0.00400683	0.242305	-0.17018	0.353351	1	0.139312	0.412202	1	-0.309496	0.0998601	1
ENSG00000152804		blue	0.269955	0.11132	HHEX	2378.77	-0.144453	0.0384027	0.508968	-0.117068	0.429798	0.891049	-0.135316	0.427084	0.855805	-0.451374	0.0036335	0.241303	-0.0182475	0.91723	1	-0.334339	0.038449	1	0.316094	0.0798648	1
ENSG00000104131		blue	0.269712	0.111655	EIF3J	2010.8	-0.172569	0.230277	0.842163	-0.315191	0.0419031	0.524961	-0.147528	0.403251	0.84454	-0.0735576	0.649255	0.969526	0.167677	0.356078	1	0.241657	0.150485	1	-0.0739802	0.691508	1
ENSG00000197776		blue	-0.268205	0.113747	KLHDC1	68.7946	-22.6775	0.0417896		0.0629925	0.561272		-0.0111787	0.90415		0.0807859	0.433155		-0.074213	0.398483	1	0.0178027	0.855208	1	-0.0920197	0.270499	1
ENSG00000055070		blue	0.262717	0.12162	SZRD1	4872.1	-0.309403	0.140277	0.750906	-0.138677	0.248968	0.81169	-0.26632	0.0616213	0.511833	0.046597	0.713297	0.973822	-0.127658	0.386543	1	0.185285	0.162662	1	-0.312945	0.0398031	1
ENSG00000170445		blue	-0.262172	0.122425	HARS	1722.22	0.524062	0.155634	0.772168	0.125557	0.470952	0.901116	0.365932	0.0578983	0.511444	-0.0471912	0.793786	0.97722	0.240422	0.224052	1	-0.172774	0.354259	1	0.413201	0.0407548	1
ENSG00000108840		blue	-0.261351	0.123642	HDAC5	3165.37	0.446619	0.081897	0.660322	0.303167	0.0396721	0.514572	0.371011	0.0286215	0.41101	0.273373	0.0763647	0.61808	0.0678578	0.697696	1	-0.0297963	0.852761	1	0.0976553	0.586555	1
ENSG00000197774		blue	0.2553	0.132899	EME2	1851.38	-0.585138	0.111835	0.700793	-0.0525494	0.765704	0.962503	-0.410889	0.034847	0.436463	-0.302711	0.0974092	0.674777	-0.358407	0.0723281	1	-0.250197	0.184496	1	-0.108213	0.594991	1
ENSG00000124508	Yes	blue	-0.253578	0.135624	BTN2A2	1683.94	0.549321	0.170898	0.787253	0.311674	0.0878799	0.629533	0.394786	0.0477927	0.477815	0.301719	0.109567	0.689368	0.0831349	0.683504	1	-0.00995552	0.959113	1	0.0930922	0.654005	1
ENSG00000103942		blue	0.252084	0.138022	HOMER2	1071.3	-0.368268	0.0560702		-0.547342	0.0122098	0.331019	-0.209793	0.329163		-0.0416681	0.848881		0.337654	0.116035	1	0.50583	0.0210251	1	-0.16818	0.431683	1
ENSG00000184402		blue	0.248838	0.143339	SS18L1	666.063	-1.5164	0.000515858		-0.117573	0.56466		-0.712027	0.000828155		0.163811	0.431062		-0.594673	0.00586335	1	0.281442	0.184279	1	-0.876136	5.74908e-05	0.698945
ENSG00000119669		blue	0.247495	0.145582	IRF2BPL	779.002	-0.515841	0.0751711		-0.148916	0.454771		-0.341614	0.104464		-0.513257	0.0117886		-0.192745	0.367246	1	-0.36442	0.0801817	1	0.171677	0.427372	1
ENSG00000182473		blue	-0.246939	0.146518	EXOC7	3965.82	0.21095	0.131557	0.743174	0.144907	0.164144	0.743498	0.195666	0.117825	0.604262	0.242917	0.0274798	0.46674	0.0507629	0.695382	1	0.0980147	0.396329	1	-0.0472518	0.724663	1
ENSG00000025800		blue	0.244125	0.151325	KPNA6	2373.87	-0.148544	0.138116	0.750906	0.0512395	0.748776	0.960237	-0.122659	0.49814	0.877938	-0.329074	0.0485099	0.552273	-0.173918	0.350218	1	-0.380357	0.0279628	1	0.206441	0.27941	1
ENSG00000153774		blue	-0.241869	0.155259	CFDP1	847.191	0.245739	0.254925		0.380376	0.048593		0.18276	0.376329		0.124464	0.529787		-0.197646	0.347607	1	-0.255954	0.207552	1	0.0583093	0.784797	1
ENSG00000125779		blue	-0.233818	0.169904	PANK2	1423.32	-0.498717	0.0731302	0.632808	0.148681	0.424134	0.891049	-0.275309	0.172819	0.663264	0.252978	0.187033	0.781531	-0.424087	0.0397577	1	0.104316	0.596822	1	-0.528413	0.0117845	1
ENSG00000140450		blue	0.227287	0.182494	ARRDC4	1270.17	-0.856033	0.142076		-0.283732	0.182703	0.758543	-0.45424	0.0355063		-0.406611	0.0588672		-0.170572	0.433054	1	-0.122914	0.572305	1	-0.0476601	0.827103	1
ENSG00000274536		blue	-0.226993	0.183075	RP6-159A1.4	523.815	0.485883	0.196814		0.176363	0.419287		0.255132	0.235474		0.465145	0.0334031		0.0787951	0.71391	1	0.288863	0.187623	1	-0.210073	0.326271	1
ENSG00000104219		blue	0.225782	0.185485	ZDHHC2	1459.75	-0.608169	0.22565	0.838112	-0.178481	0.320515	0.854132	-0.414361	0.0357005	0.438131	-0.126837	0.494746	0.937532	-0.235936	0.242538	1	0.0516513	0.787442	1	-0.287593	0.16232	1
ENSG00000121774		blue	0.222917	0.191276	KHDRBS1	5863.48	0.0812006	0.0798085	0.658863	0.00387686	0.967795	0.993692	0.0702168	0.545193	0.900605	-0.214584	0.0349985	0.491711	0.0663451	0.581505	1	-0.21847	0.0409049	1	0.284816	0.022366	1
ENSG00000165943		blue	0.220292	0.196692	MOAP1	1811.42	0.0144241	0.144061	0.750906	-0.205501	0.252083	0.816078	-0.0267957	0.891845	0.97666	-0.397609	0.0321331	0.484745	0.178739	0.375494	1	-0.192142	0.315345	1	0.370885	0.0713078	1
ENSG00000256537		blue	-0.214376	0.209289	RP11-785H5.1	632.197	-0.389513	0.051075		0.396715	0.0460685		-0.166929	0.427198		0.103001	0.612739		-0.563774	0.00830594	1	-0.293763	0.157797	1	-0.270017	0.211618	1
ENSG00000136720		blue	0.212	0.214504	HS6ST1	779.274	-0.263622	0.237022		-0.127202	0.549591		-0.178577	0.408341		-0.437908	0.041641		-0.0513876	0.813295	1	-0.310793	0.153009	1	0.259411	0.234674	1
ENSG00000172340		blue	0.211263	0.216139	SUCLG2	963.829	-0.0167524	0.0461105		-0.400226	0.0528574	0.54637	-0.0266299	0.901017		0.196027	0.351093		0.373683	0.0845636	1	0.596386	0.0052823	1	-0.222707	0.307615	1
ENSG00000176531		blue	-0.209456	0.220184	PHLDB3	384.259	-0.0522939	0.209091		0.258444	0.234768		-0.00575521	0.977716		-0.189682	0.377635		-0.264286	0.194152	1	-0.448287	0.0351498	1	0.184006	0.358769	1
ENSG00000075884		blue	0.207386	0.224882	ARHGAP15	1654.8	-0.366908	0.224167	0.838112	0.0360365	0.825467	0.972583	-0.252723	0.169783	0.658333	0.151602	0.372802	0.903772	-0.28881	0.126751	1	0.115581	0.512153	1	-0.404396	0.036813	1
ENSG00000167081		blue	-0.203341	0.234257	PBX3	824.375	-0.322551	0.181408		0.345343	0.100659		-0.0986933	0.646872		0.136954	0.520701		-0.444158	0.0410707	1	-0.208431	0.335007	1	-0.235732	0.280706	1
ENSG00000175886		blue	0.200809	0.240259	RPL7AP66	384.49	0.27831	0.0178249		-0.564172	0.00898001		0.0658786	0.760561		-0.0610161	0.778906		0.63024	0.00368022	1	0.503301	0.0215458	1	0.126942	0.558451	1
ENSG00000229237		blue	-0.200761	0.240372	HMGN1P37	13.0473	4.19965	0.021575		0.279979	0.0238515		0.20277	0.0569335		0.0650219	0.581352		-0.0772468	0.445341	1	-0.215073	0.054895	1	0.137832	0.152236	1
ENSG00000242262		blue	-0.196107	0.251675	RP11-100N21.1	11.6895	0.954546	0.094632		0.403291	0.0143594		0.149515	0.29999		0.0927013	0.557384		-0.253892	0.0667045	1	-0.310735	0.0404791	1	0.0568446	0.668426	1
ENSG00000122591		blue	0.194865	0.254751	FAM126A	1280.22	0.481556	0.00197791		-0.185625	0.259342	0.821826	0.324661	0.0792291		-0.380322	0.0263837		0.510364	0.00723808	1	-0.194726	0.272627	1	0.705099	0.000290808	1
ENSG00000176946		blue	0.188025	0.272133	THAP4	818.977	-0.048091	0.0133684		-0.282474	0.168616		-0.104126	0.625661		-0.657628	0.00165007		0.178394	0.409251	1	-0.375254	0.0777883	1	0.553659	0.0111076	1
ENSG00000039523		blue	0.185944	0.27757	FAM65A	3515.64	-0.476036	0.118725	0.712277	-0.0779496	0.57626	0.917108	-0.384008	0.0177561	0.339344	-0.0299211	0.837989	0.985586	-0.306097	0.067077	1	0.0480333	0.752919	1	-0.354134	0.0395851	1
ENSG00000146834		blue	0.184985	0.2801	MEPCE	1886.35	0.296765	0.115877	0.708999	-0.260623	0.122317	0.68735	0.197561	0.294509	0.779178	0.00490374	0.977672	0.996758	0.458252	0.0178311	1	0.265559	0.143119	1	0.192696	0.330014	1
ENSG00000187240		blue	-0.184724	0.28079	DYNC2H1	81.5022	-6.08193	0.0275201		0.123028	0.337905		0.00555445	0.959955		0.156216	0.201772		-0.117539	0.263434	1	0.0332045	0.775158	1	-0.15075	0.132234	1
ENSG00000134698		blue	-0.17752	0.300301	AGO4	4830.56	-0.243592	0.142812	0.750906	0.10388	0.345348	0.862363	-0.210185	0.110321	0.599861	0.049522	0.670345	0.971535	-0.314086	0.0212268	1	-0.0543595	0.655684	1	-0.259728	0.0654179	1
ENSG00000255836		blue	-0.176858	0.302137	RP11-157G21.2	16.0794	3.29477	0.116683		0.210644	0.134802		0.255521	0.0361893		0.179982	0.181006		0.0449001	0.699285	1	-0.0306774	0.810877	1	0.0755805	0.495841	1
ENSG00000133958		blue	0.173187	0.312442	UNC79	1.89463	4.93697			0.132809	0.183156		0.167896	0.0487032		0.0340795	0.718915		0.0351052	0.663139	1	-0.0987854	0.270059	1	0.133896	0.0798616	1
ENSG00000161547		blue	0.171341	0.317707	SRSF2	7892.62	-0.0866681	0.134039	0.745937	-0.0351932	0.685225	0.942578	-0.0835309	0.429076	0.8562	-0.212128	0.0213509	0.459558	-0.0483389	0.659255	1	-0.17694	0.0677477	1	0.128601	0.257898	1
ENSG00000124782		blue	0.157367	0.359349	RREB1	3104.22	-0.420385	0.12682	0.734091	-0.0657666	0.613629	0.928031	-0.354779	0.0202508	0.352369	-0.170245	0.21406	0.813173	-0.289042	0.0671737	1	-0.104486	0.465387	1	-0.184558	0.256979	1
ENSG00000136875		blue	-0.153452	0.371576	PRPF4	1157.46	-0.630036	0.130902		0.205124	0.317459	0.852056	-0.302057	0.15704		-0.0879276	0.673916		-0.507317	0.0189364	1	-0.29311	0.168274	1	-0.214212	0.325851	1
ENSG00000132286		blue	-0.147023	0.39218	TIMM10B	595.201	-0.581054	0.0052425		0.594078	0.00619452		-0.111816	0.604521		0.198904	0.361637		-0.706115	0.0010996	1	-0.395267	0.0714308	1	-0.310858	0.150027	1
ENSG00000148343		blue	0.143657	0.403227	FAM73B	1921.11	-0.651139	0.115197	0.706761	-0.225616	0.232207	0.795687	-0.405023	0.0469965	0.472606	0.045273	0.815808	0.982082	-0.179464	0.388344	1	0.270934	0.174817	1	-0.450406	0.0331401	1
ENSG00000205937		blue	0.139699	0.416442	RNPS1	4575.56	-0.0307173	0.030926	0.46607	-0.137932	0.202494	0.775224	-0.0254907	0.844028	0.971292	0.212838	0.0627623	0.593787	0.112444	0.402195	1	0.350786	0.00344123	1	-0.238343	0.0859635	1
ENSG00000175634		blue	0.128937	0.453581	RPS6KB2	2132.24	-0.503655	0.133901	0.745937	0.124106	0.47184	0.901116	-0.330164	0.084956	0.559778	0.0523474	0.769851	0.973822	-0.454353	0.0207652	1	-0.0717657	0.697993	1	-0.382593	0.0566956	1
ENSG00000219626		blue	-0.127434	0.458909	FAM228B	326.191	-0.386315	0.195609		0.374573	0.0815434		-0.0201173	0.920429		0.076978	0.716167		-0.394841	0.046361	1	-0.297695	0.15374	1	-0.0971499	0.617592	1
ENSG00000131943		blue	0.124721	0.468602	C19orf12	443.03	0.211334	0.175269		-0.404643	0.0647267		0.0282455	0.894888		-0.0872224	0.690047		0.433034	0.0421583	1	0.317523	0.146447	1	0.115514	0.585284	1
ENSG00000260521		blue	-0.123088	0.47449	CTD-2576F9.1	40.2469	-0.0895761	0.120227		0.265715	0.175591		0.00154798	0.993015		-0.165076	0.385813		-0.264276	0.123584	1	-0.430984	0.0197395	1	0.166714	0.316122	1
ENSG00000153879		blue	-0.121482	0.48032	CEBPG	1570.2	0.123485	0.014777	0.347452	0.3524	0.0342264	0.490666	0.0951923	0.610028	0.917661	-0.213964	0.216481	0.814169	-0.257232	0.179449	1	-0.566433	0.00157863	1	0.309204	0.114924	1
ENSG00000212664		blue	0.106843	0.535117	RP11-592N21.1	189.472	-1.17817	0.097793		-0.193113	0.378423		-0.366318	0.0849462		0.108261	0.62024		-0.1733	0.412811	1	0.301466	0.166711	1	-0.47478	0.0236851	1
ENSG00000111859		blue	0.105218	0.541382	NEDD9	1893	-0.243121	0.116475	0.709916	-0.188317	0.286841	0.836265	-0.159316	0.414074	0.848939	0.226552	0.215784	0.814169	0.028993	0.88461	1	0.414927	0.0280811	1	-0.385939	0.0583065	1
ENSG00000240303		blue	0.097114	0.573125	ACAD11	219.119	1.07433	0.236492		-0.151712	0.413996		0.164409	0.32086		-0.101258	0.572752		0.316268	0.0479548	1	0.0504778	0.770994	1	0.2658	0.085248	1
ENSG00000103194		blue	-0.0951178	0.581072	USP10	2599.79	-0.231055	0.0378581	0.508968	-2.92509e-05	0.999855	0.999883	-0.149253	0.41291	0.848939	0.356858	0.0337655	0.487556	-0.149255	0.425708	1	0.356928	0.0406482	1	-0.506189	0.00837337	1
ENSG00000133195		blue	0.0907294	0.598713	SLC39A11	1199.71	0.281006	0.161924		-0.305417	0.114384	0.681252	0.149348	0.470427		0.0189576	0.92394		0.454858	0.0309158	1	0.324432	0.111003	1	0.130428	0.541808	1
ENSG00000167711		blue	-0.0845766	0.623829	SERPINF2	303.566	1.12434	0.144991		-0.109267	0.600429		0.29254	0.127608		0.203115	0.319676		0.401977	0.0322884	1	0.312513	0.117838	1	0.0894672	0.625581	1
ENSG00000168488		blue	0.0731795	0.671456	ATXN2L	6312.16	-0.0123931	0.131988	0.744145	-0.0553553	0.571877	0.917108	-0.0162878	0.890397	0.97666	-0.236487	0.0226412	0.46674	0.0390706	0.749892	1	-0.181139	0.0962618	1	0.22021	0.0827772	1
ENSG00000224712		blue	0.0578449	0.737549	NPIPA3	11.4423	-9.1849	0.0270493		-0.0853852	0.351523		-0.0621012	0.426614		0.0204086	0.814481		0.023297	0.752171	1	0.105853	0.197369	1	-0.0825598	0.238066	1
ENSG00000076984		blue	0.0462417	0.788852	MAP2K7	1763.45	-0.0358843	0.192201	0.813872	0.134619	0.434009	0.891951	-0.032229	0.866212	0.973168	-0.266904	0.134952	0.724113	-0.166867	0.394934	1	-0.401578	0.0295842	1	0.234713	0.24165	1
ENSG00000206527		blue	0.0269438	0.876044	PTPLB	2400.39	-0.341219	0.212763	0.832565	0.120595	0.42395	0.891049	-0.252262	0.144328	0.636317	0.0530526	0.73656	0.973822	-0.372906	0.0361482	1	-0.0675473	0.68044	1	-0.305362	0.0948383	1
ENSG00000149260		blue	0.00984078	0.954575	CAPN5	28.581	-7.18157	0.0242344		-0.0681332	0.457485		-0.102563	0.189489		-0.119761	0.168648		-0.0344508	0.640803	1	-0.0516583	0.529468	1	0.0172082	0.805855	1
ENSG00000217325		blue	0.00979579	0.954783	PRELID1P1	15.0353	-1.91844	0.0023043		-0.258319	0.154087		-0.145034	0.367406		0.311015	0.0760773		0.113339	0.464423	1	0.569606	0.000743101	1	-0.456284	0.0023113	1
ENSG00000224781		blue	-0.0095831	0.955764	EIF4A2P4	2.92938	-4.72474	0.179448		-0.225332	0.0677916		-0.233028	0.0279441		-0.247119	0.0354287		-0.00770468	0.938893	1	-0.0218017	0.844771	1	0.0140975	0.882836	1
ENSG00000026025		brown	0.86543	9.70936e-12	VIM	81970.5	-0.461044	0.0690204	0.630021	-0.0239778	0.851164	0.976608	-0.385439	0.0103004	0.284534	-0.0332049	0.804999	0.978373	-0.361498	0.0199184	1	-0.00922676	0.947659	1	-0.352274	0.0278593	1
ENSG00000197747		brown	0.839554	1.56579e-10	S100A10	9282.44	-0.526086	0.103531	0.69074	-0.0881142	0.542136	0.909699	-0.418902	0.0120495	0.288352	-0.0929497	0.539341	0.949333	-0.330833	0.0544852	1	-0.00483513	0.975544	1	-0.326001	0.0654046	1
ENSG00000164733		brown	0.825271	5.93871e-10	CTSB	14662	-0.522596	0.0505913	0.558245	-0.175306	0.189481	0.76555	-0.439009	0.00492662	0.203306	-0.189961	0.176072	0.77564	-0.263734	0.101955	1	-0.0146559	0.920351	1	-0.249081	0.133904	1
ENSG00000115355		brown	0.811709	1.89302e-09	CCDC88A	14391	-0.26385	0.124454	0.728714	0.0834579	0.449112	0.897431	-0.22788	0.0837783	0.554542	0.0682029	0.558319	0.952099	-0.31136	0.0225374	1	-0.0152548	0.900579	1	-0.296106	0.0359063	1
ENSG00000137101		brown	-0.809094	2.34211e-09	CD72	1695.33	0.900137	0.131043	0.743174	0.0922074	0.669553	0.936841	0.412534	0.0563278	0.511444	-0.0544479	0.802276	0.97747	0.320425	0.139651	1	-0.1467	0.503	1	0.467137	0.0312121	1
ENSG00000007237		brown	0.801734	4.19231e-09	GAS7	6785.29	-0.568981	0.0474543	0.539611	-0.199421	0.193913	0.768708	-0.453304	0.00968375	0.281395	-0.332167	0.0383305	0.507482	-0.253922	0.15928	1	-0.13276	0.425743	1	-0.121164	0.512957	1
ENSG00000100307		brown	-0.78975	1.0292e-08	CBX7	1268.66	1.02516	0.190194		0.284764	0.193304	0.768708	0.444467	0.0380078		0.13132	0.548301		0.159764	0.454751	1	-0.15349	0.483153	1	0.313262	0.140334	1
ENSG00000107738		brown	0.783964	1.55577e-08	C10orf54	17690.6	-0.447411	0.0759936	0.645143	-0.183258	0.15832	0.734522	-0.383138	0.0119326	0.288352	-0.223805	0.101456	0.681703	-0.199902	0.204305	1	-0.0405495	0.77636	1	-0.159354	0.326417	1
ENSG00000124772		brown	-0.783845	1.56887e-08	CPNE5	1378.45	1.30596	0.108129	0.691066	0.0651194	0.765069	0.962503	0.464934	0.0246846	0.380909	0.271149	0.208519	0.806008	0.39996	0.0506502	1	0.206103	0.334569	1	0.193863	0.336611	1
ENSG00000084234	Yes	brown	0.77654	2.59642e-08	APLP2	22968.4	-0.274888	0.0885637	0.66859	-0.0597796	0.46549	0.900242	-0.257792	0.00990911	0.282266	-0.0537227	0.536859	0.949333	-0.19802	0.0563656	1	0.00605723	0.947206	1	-0.204078	0.057957	1
ENSG00000168461		brown	0.773899	3.10093e-08	RAB31	8331.7	-0.369722	0.196143	0.813872	-0.0470978	0.7054	0.948523	-0.313591	0.0328538	0.43061	-0.0396081	0.762781	0.973822	-0.266519	0.0794619	1	0.0074908	0.956463	1	-0.274012	0.0805937	1
ENSG00000177731		brown	0.773465	3.1922e-08	FLII	11417.2	-0.337538	0.0205052	0.393161	0.01989	0.825572	0.972583	-0.31107	0.00452363	0.202433	-0.100837	0.292208	0.86607	-0.330975	0.00359601	1	-0.12073	0.230015	1	-0.210246	0.074341	1
ENSG00000179820	Yes	brown	0.77159	3.6149e-08	MYADM	9330.37	-0.537453	0.0204075	0.393161	0.157288	0.30426	0.847594	-0.391612	0.0251188	0.383641	0.102472	0.521772	0.949333	-0.548977	0.00229376	1	-0.0548179	0.741627	1	-0.494165	0.00750352	1
ENSG00000142634		brown	0.769214	4.22477e-08	EFHD2	15559.3	-0.234746	0.188773	0.810129	0.105763	0.354326	0.866056	-0.200034	0.141347	0.632527	0.0441875	0.713989	0.973822	-0.305819	0.0298575	1	-0.0615777	0.625796	1	-0.244243	0.0932741	1
ENSG00000204642	Yes	brown	-0.756884	9.22265e-08	HLA-F	5838.52	0.514732	0.0286175	0.447119	0.158248	0.230955	0.795687	0.431436	0.00526064	0.205436	0.0414553	0.76534	0.973822	0.273218	0.0871313	1	-0.116802	0.420578	1	0.390024	0.0178297	1
ENSG00000102575		brown	-0.73579	3.17052e-07	ACP5	827.515	0.955936	0.0856372		0.0364889	0.863028		0.496231	0.0214463		0.199691	0.351034		0.459868	0.0345297	1	0.163242	0.451639	1	0.296633	0.174509	1
ENSG00000136830		brown	0.729559	4.46707e-07	FAM129B	3155.48	-0.517378	0.0932495	0.678951	-0.313786	0.059479	0.566889	-0.385549	0.0388875	0.442906	-0.0560521	0.746085	0.973822	-0.071788	0.708018	1	0.257765	0.150526	1	-0.329557	0.0929337	1
ENSG00000163644		brown	-0.728862	4.63905e-07	PPM1K	2024.57	0.788892	0.0858606	0.667624	0.204348	0.328727	0.857017	0.414763	0.0537924	0.500459	-0.0962405	0.650347	0.969526	0.210481	0.332618	1	-0.300664	0.162941	1	0.511155	0.0193335	1
ENSG00000122025	Yes	brown	0.723745	6.10021e-07	FLT3	5309.85	-0.566588	0.0253605	0.433446	-0.060021	0.68122	0.940708	-0.45572	0.00678974	0.241903	-0.305101	0.046147	0.547407	-0.395748	0.0225864	1	-0.245102	0.123912	1	-0.150648	0.398515	1
ENSG00000196924		brown	0.721859	6.73803e-07	FLNA	76306.1	-0.237824	0.0709543	0.630745	-0.0292479	0.688143	0.943311	-0.22646	0.0112937	0.288352	-0.101017	0.192357	0.79061	-0.197218	0.0336669	1	-0.07177	0.378825	1	-0.125449	0.193047	1
ENSG00000131504		brown	0.717583	8.41692e-07	DIAPH1	12575.8	-0.242156	0.224994	0.838112	-0.112801	0.217303	0.78378	-0.224592	0.0428234	0.464007	-0.0672001	0.488254	0.937532	-0.111797	0.331151	1	0.045603	0.654363	1	-0.1574	0.186725	1
ENSG00000111252		brown	0.714626	9.79378e-07	SH2B3	16708.7	-0.592199	2.41813e-06	0.00543	-0.491821	9.83926e-06	0.0139914	-0.539252	4.92472e-05	0.0550953	-0.428303	0.000268561	0.0632531	-0.0474407	0.730242	1	0.0635198	0.606065	1	-0.110961	0.435377	1
ENSG00000100300		brown	0.711216	1.16365e-06	TSPO	6065.33	-0.352454	0.153741	0.768018	0.0694449	0.595676	0.920957	-0.290146	0.0585749	0.511444	-0.0604434	0.660559	0.970454	-0.359626	0.0232707	1	-0.129896	0.366202	1	-0.229732	0.159762	1
ENSG00000213918		brown	-0.709674	1.257e-06	DNASE1	857.162	1.08549	0.183324		0.200781	0.359393		0.467542	0.0287379		0.289434	0.185726		0.266853	0.210494	1	0.0886806	0.685046	1	0.178177	0.399925	1
ENSG00000196405		brown	-0.709127	1.29173e-06	EVL	7302.34	0.530901	0.0280974	0.447119	0.122344	0.351626	0.86524	0.449106	0.003508	0.189136	0.188456	0.172409	0.77564	0.326795	0.0397731	1	0.0661157	0.646669	1	0.260682	0.111608	1
ENSG00000241399	Yes	brown	0.705812	1.52168e-06	CD302	5626.32	-0.382155	0.0944005	0.681596	0.0425827	0.753074	0.961851	-0.315231	0.0458972	0.468891	-0.189708	0.182156	0.777949	-0.357849	0.02818	1	-0.232308	0.117442	1	-0.125543	0.454827	1
ENSG00000196456		brown	-0.705542	1.54197e-06	ZNF775	789.528	1.05031	0.236091		0.124085	0.571404		0.426216	0.0452359		0.161962	0.458579		0.302235	0.153712	1	0.0378883	0.862077	1	0.264354	0.208424	1
ENSG00000171791		brown	-0.704965	1.58619e-06	BCL2	2306.53	0.525825	0.10561	0.69074	-0.230339	0.253584	0.817678	0.270494	0.20148	0.690238	-0.125365	0.542797	0.949333	0.50095	0.0197378	1	0.104993	0.617445	1	0.395965	0.068211	1
ENSG00000123146		brown	0.70445	1.62665e-06	CD97	9909.34	-0.479923	0.0868727	0.667624	0.0374037	0.793214	0.967794	-0.37715	0.022319	0.363191	-0.013474	0.928217	0.993705	-0.414605	0.0148815	1	-0.0508805	0.744052	1	-0.363728	0.0378391	1
ENSG00000026950	Yes	brown	-0.702903	1.75383e-06	BTN3A1	2954.96	0.4279	0.0817566	0.660322	-0.0991513	0.500701	0.906385	0.332928	0.0493278	0.482839	0.0444902	0.772824	0.973822	0.43213	0.0133088	1	0.143653	0.370551	1	0.28848	0.107894	1
ENSG00000181467		brown	0.699342	2.08206e-06	RAP2B	4437.34	-0.476791	0.0811614	0.659194	-0.237451	0.103443	0.663513	-0.393093	0.0193403	0.347552	-0.280832	0.0659144	0.598446	-0.155665	0.368977	1	-0.0433851	0.784981	1	-0.112282	0.528533	1
ENSG00000168385		brown	0.698529	2.16443e-06	37500	9930.32	-0.342544	0.120519	0.716027	-0.182853	0.10468	0.666247	-0.305267	0.0231322	0.369016	-0.104185	0.381385	0.906153	-0.122427	0.379046	1	0.0786716	0.528095	1	-0.201099	0.162168	1
ENSG00000110719	Yes	brown	0.698497	2.16771e-06	TCIRG1	16892.2	-0.230042	0.161229	0.775246	0.123958	0.277225	0.831158	-0.195691	0.149852	0.638077	0.0394618	0.743214	0.973822	-0.319671	0.023073	1	-0.0844997	0.503006	1	-0.235173	0.105803	1
ENSG00000130147		brown	0.692838	2.8303e-06	SH3BP4	2102.66	-1.09956	0.00358774	0.194127	-0.129084	0.480515	0.906021	-0.720385	0.000310724	0.0982811	-0.356952	0.058814	0.568969	-0.591435	0.00377716	1	-0.227902	0.24141	1	-0.363541	0.0804624	1
ENSG00000178913		brown	-0.686153	3.84912e-06	TAF7	2819.34	0.526738	0.0948364	0.681653	0.216157	0.151096	0.718592	0.421657	0.0145039	0.313568	0.158685	0.313498	0.875721	0.205531	0.247345	1	-0.0574776	0.725562	1	0.263012	0.149553	1
ENSG00000104774		brown	0.685741	3.92169e-06	MAN2B1	12537.5	-0.376564	0.0704769	0.630501	-0.185185	0.113148	0.679835	-0.33488	0.015903	0.319872	-0.226809	0.0659553	0.598446	-0.149709	0.297673	1	-0.0416267	0.747206	1	-0.108083	0.466769	1
ENSG00000128829		brown	0.684733	4.10467e-06	EIF2AK4	4949.59	-0.478693	0.227885	0.838112	-0.0294086	0.861961	0.977634	-0.329408	0.0811622	0.554233	0.0679079	0.699082	0.973822	-0.300057	0.121591	1	0.09733	0.592379	1	-0.397393	0.0449723	1
ENSG00000103381		brown	0.681929	4.65533e-06	CPPED1	5959.99	-0.294751	0.0771807	0.646677	-0.137897	0.310523	0.84916	-0.237964	0.133263	0.621263	0.159251	0.264723	0.852316	-0.100085	0.540826	1	0.297171	0.0460962	1	-0.397259	0.0184355	1
ENSG00000173442		brown	0.681458	4.75413e-06	EHBP1L1	14438.6	-0.330533	0.0383246	0.508968	0.0640784	0.522572	0.908209	-0.296056	0.0142297	0.312147	-0.0150696	0.887073	0.990212	-0.360155	0.00401898	1	-0.0791504	0.47722	1	-0.281006	0.0301654	1
ENSG00000124813		brown	0.679763	5.12603e-06	RUNX2	2589.9	-0.912501	0.0230723	0.417814	-0.196884	0.268324	0.82902	-0.61803	0.00160614	0.135613	-0.172597	0.348382	0.899442	-0.421242	0.0357094	1	0.0242915	0.898225	1	-0.445542	0.0294315	1
ENSG00000110367		brown	-0.677913	5.56196e-06	DDX6	5181.86	0.315098	0.153244	0.767243	-0.086943	0.518628	0.90783	0.253078	0.107413	0.593019	-0.0640837	0.650655	0.969526	0.340055	0.0361988	1	0.0228596	0.876999	1	0.317198	0.0579037	1
ENSG00000147459		brown	0.677752	5.60134e-06	DOCK5	3492.12	-0.587624	0.215154	0.832565	-0.203166	0.277783	0.831158	-0.398227	0.0495247	0.482839	-0.301758	0.117627	0.699973	-0.195109	0.345888	1	-0.0986095	0.618911	1	-0.0965019	0.64662	1
ENSG00000141480		brown	0.67592	6.06933e-06	ARRB2	9339.42	-0.360157	0.198771	0.816513	-0.207049	0.117668	0.682585	-0.306426	0.0478349	0.477815	-0.119232	0.391383	0.910807	-0.0993917	0.534393	1	0.0878232	0.54544	1	-0.187217	0.256178	1
ENSG00000104312		brown	0.675695	6.12912e-06	RIPK2	1385.86	-1.07782	0.0839041	0.666926	-0.372321	0.0814462	0.624438	-0.519342	0.016275	0.325136	-0.177199	0.411547	0.917416	-0.147094	0.498897	1	0.195171	0.370763	1	-0.342274	0.116398	1
ENSG00000184922		brown	0.673444	6.75839e-06	FMNL1	22610	-0.468615	0.000304599	0.056768	-0.206009	0.0188507	0.389901	-0.43883	3.87974e-05	0.0550953	-0.250328	0.00715993	0.292712	-0.232832	0.035411	1	-0.0443205	0.650514	1	-0.188513	0.100391	1
ENSG00000123416		brown	0.673375	6.7786e-06	TUBA1B	16846.7	-0.361365	0.0884091	0.66859	-0.190768	0.0882149	0.63036	-0.323186	0.0155133	0.318159	-0.136744	0.247319	0.839762	-0.132431	0.338244	1	0.0540261	0.662665	1	-0.186458	0.192164	1
ENSG00000143702		brown	0.672569	7.01839e-06	CEP170	2280.94	-0.548377	0.0424179	0.513307	-0.116357	0.453242	0.898768	-0.432406	0.0144284	0.313568	-0.357203	0.0274589	0.46674	-0.316095	0.0822844	1	-0.240872	0.1524	1	-0.0752242	0.686999	1
ENSG00000005206	Yes	brown	-0.669434	8.02707e-06	SPPL2B	3000.06	0.217924	0.0565323	0.582872	-0.38387	0.0315356	0.480835	0.113757	0.562384	0.909529	-0.180825	0.327507	0.885057	0.49771	0.0132892	1	0.203072	0.286475	1	0.294642	0.150662	1
ENSG00000167173		brown	0.664404	9.92418e-06	C15orf39	7095.89	-0.507836	0.0181637	0.371733	-0.167181	0.19526	0.77074	-0.43643	0.00398649	0.195101	-0.316244	0.0198896	0.449351	-0.269276	0.0856321	1	-0.149073	0.293486	1	-0.120204	0.456856	1
ENSG00000099337		brown	0.663194	1.04374e-05	KCNK6	6641.83	-0.417669	0.0737037	0.632893	-0.07889	0.516459	0.90783	-0.362406	0.0117621	0.288352	-0.198592	0.121289	0.706153	-0.283541	0.0567329	1	-0.119709	0.371996	1	-0.163833	0.286284	1
ENSG00000146842		brown	-0.659508	1.21541e-05	TMEM209	576.73	0.318081	0.148624		-0.357765	0.0930813		0.119657	0.579711		0.00620171	0.977019		0.477554	0.0281742	1	0.364061	0.0945071	1	0.113497	0.602944	1
ENSG00000115738		brown	0.653582	1.54598e-05	ID2	4687.47	-0.599569	0.191457	0.813698	-0.288681	0.117218	0.682585	-0.409041	0.0415227	0.456546	-0.169666	0.372147	0.903772	-0.120397	0.557131	1	0.119033	0.542998	1	-0.239435	0.251382	1
ENSG00000197694		brown	-0.6534	1.55732e-05	SPTAN1	5763.43	0.293573	0.13872	0.750906	-0.0112607	0.928604	0.986902	0.243744	0.0996957	0.587433	-0.11495	0.385102	0.907155	0.255029	0.0957118	1	-0.103697	0.453572	1	0.358728	0.0231423	1
ENSG00000241106	Yes	brown	-0.651308	1.6931e-05	HLA-DOB	1725.98	0.932013	0.107446	0.69074	0.170627	0.433192	0.891838	0.408566	0.0580801	0.511444	-0.0829485	0.704083	0.973822	0.23802	0.270015	1	-0.253655	0.247455	1	0.491687	0.0222921	1
ENSG00000100225		brown	0.647905	1.93719e-05	FBXO7	3598.41	-0.523737	0.00646167	0.255928	-0.212185	0.0584652	0.565408	-0.464257	0.000524617	0.103926	-0.110457	0.351033	0.899442	-0.252094	0.0690128	1	0.101734	0.412389	1	-0.35383	0.0135505	1
ENSG00000204592	Yes	brown	-0.646352	2.05892e-05	HLA-E	46653	0.135264	0.0929215	0.678951	-0.11535	0.140291	0.707424	0.125156	0.19071	0.681811	-0.0547624	0.509975	0.944203	0.240513	0.0154581	1	0.0605881	0.488327	1	0.179925	0.0808246	1
ENSG00000187257		brown	-0.642953	2.34977e-05	RSBN1L	1369.63	0.749631	0.111581	0.700793	0.194233	0.328585	0.857017	0.471354	0.0249086	0.381733	0.370804	0.0682988	0.599305	0.277188	0.194297	1	0.176605	0.395645	1	0.100585	0.641621	1
ENSG00000163931		brown	0.642453	2.39557e-05	TKT	16742.4	-0.273947	0.106641	0.69074	-0.203226	0.112073	0.676885	-0.243935	0.104707	0.592369	-0.304384	0.0237463	0.46674	-0.040715	0.793333	1	-0.101166	0.472042	1	0.0604509	0.706091	1
ENSG00000160216		brown	0.640119	2.6203e-05	AGPAT3	4931.84	-0.344852	0.140517	0.750906	0.0283068	0.814696	0.972088	-0.295563	0.0387745	0.442906	-0.102132	0.422544	0.917971	-0.323896	0.028586	1	-0.130446	0.32755	1	-0.193452	0.205437	1
ENSG00000160789		brown	0.638001	2.8406e-05	LMNA	6236.82	-1.04836	0.0837285	0.666926	-0.292894	0.171426	0.7463	-0.468887	0.030101	0.418355	-0.0119131	0.956043	0.994027	-0.176079	0.418121	1	0.281052	0.197894	1	-0.457142	0.0358603	1
ENSG00000130429		brown	0.635559	3.11533e-05	ARPC1B	18967.7	-0.2019	0.186882	0.809838	0.0760061	0.432523	0.891838	-0.180629	0.122572	0.608914	0.0514382	0.616118	0.96539	-0.256649	0.0343735	1	-0.0245682	0.819571	1	-0.232082	0.0647176	1
ENSG00000108175		brown	0.631092	3.68096e-05	ZMIZ1	6398.26	-0.609856	0.0256844	0.433446	-0.371695	0.0209387	0.403548	-0.479927	0.00833228	0.25865	-0.337033	0.0444834	0.542407	-0.108258	0.562665	1	0.0346646	0.842076	1	-0.142925	0.455803	1
ENSG00000143110		brown	0.62623	4.40098e-05	C1orf162	7455.63	-0.331721	0.176951	0.791522	0.117981	0.412021	0.891049	-0.252957	0.127906	0.613869	0.0691158	0.646505	0.969526	-0.370983	0.0303788	1	-0.0488682	0.755577	1	-0.322118	0.0675966	1
ENSG00000211895		brown	-0.625914	4.45191e-05	IGHA1	1332.97	1.65192	0.179602		0.274472	0.165899	0.745795	0.374246	0.0367029		0.106737	0.57934		0.0998202	0.566196	1	-0.167809	0.369901	1	0.267638	0.113054	1
ENSG00000076108		brown	-0.625141	4.57872e-05	BAZ2A	7073.56	0.167439	0.222678	0.838112	-0.15774	0.186724	0.76555	0.138182	0.329084	0.802534	-0.0511344	0.684837	0.973822	0.295944	0.043382	1	0.10661	0.418774	1	0.189335	0.210804	1
ENSG00000026508	Yes	brown	0.625069	4.59064e-05	CD44	17285.2	-0.395398	0.0158643	0.35446	-0.213854	0.0389127	0.511167	-0.357658	0.00405462	0.195101	-0.0433278	0.692529	0.973822	-0.143817	0.264849	1	0.170534	0.1379	1	-0.314352	0.018522	1
ENSG00000173327		brown	0.624458	4.6935e-05	MAP3K11	6055.82	-0.451437	0.0161494	0.355523	0.074401	0.530564	0.909108	-0.383993	0.00637725	0.234849	0.0130031	0.917242	0.992643	-0.458432	0.00164855	1	-0.0614001	0.639214	1	-0.397034	0.00831775	1
ENSG00000127507		brown	0.623287	4.89642e-05	EMR2	2727.43	-0.596022	0.0257388	0.433446	-0.435091	0.0102138	0.315738	-0.446077	0.0183243	0.340254	-0.12485	0.477866	0.932821	-0.0110053	0.954772	1	0.310279	0.0883038	1	-0.321289	0.105382	1
ENSG00000124831		brown	0.622917	4.96223e-05	LRRFIP1	13753.4	-0.216487	0.10833	0.691066	0.0487331	0.628017	0.931656	-0.191139	0.114679	0.601685	0.124768	0.241324	0.833276	-0.239887	0.0561535	1	0.0760383	0.496193	1	-0.315927	0.0151154	1
ENSG00000178252		brown	-0.621636	5.19592e-05	WDR6	4947.94	0.508048	0.00955793	0.302286	0.295097	0.0155547	0.367116	0.446513	0.00196145	0.146292	0.228612	0.0753848	0.61808	0.151433	0.310018	1	-0.0664886	0.621003	1	0.217923	0.157058	1
ENSG00000165280		brown	0.620731	5.36717e-05	VCP	7212.5	-0.279367	0.129583	0.740405	0.0240586	0.804638	0.970068	-0.252999	0.0312987	0.42488	-0.0405853	0.693694	0.973822	-0.277073	0.0229558	1	-0.0646458	0.550112	1	-0.212428	0.0922714	1
ENSG00000140575		brown	0.619821	5.54433e-05	IQGAP1	22955	-0.338326	0.0540125	0.577548	-0.00321477	0.975282	0.994562	-0.300489	0.01594	0.319872	0.0515296	0.638796	0.968594	-0.297294	0.0213926	1	0.0547474	0.634478	1	-0.352043	0.00846595	1
ENSG00000143537	Yes	brown	0.619147	5.67885e-05	ADAM15	7985.87	-0.448453	0.229358	0.841541	-0.026677	0.859027	0.977286	-0.347375	0.0436361	0.46783	-0.0791129	0.614495	0.96539	-0.320743	0.0705488	1	-0.05244	0.748243	1	-0.268306	0.140868	1
ENSG00000107819		brown	0.612688	7.12719e-05	SFXN3	1791.41	-0.947572	0.0582161	0.586208	-0.324931	0.101684	0.660247	-0.559044	0.00776659	0.251119	-0.176229	0.385666	0.907155	-0.234195	0.272522	1	0.14873	0.473944	1	-0.382933	0.0762756	1
ENSG00000166401		brown	0.610109	7.79281e-05	SERPINB8	2173.2	-0.859511	0.00735784	0.264353	0.0990359	0.607608	0.924578	-0.45306	0.0282947	0.41101	0.277749	0.160794	0.766122	-0.552246	0.00868549	1	0.178746	0.378762	1	-0.731007	0.000618115	1
ENSG00000168214		brown	0.609339	8.00222e-05	RBPJ	5298.7	-0.44486	0.117355	0.710177	0.142902	0.375115	0.875186	-0.312798	0.085763	0.563084	0.0341065	0.839	0.985586	-0.45577	0.0148739	1	-0.108805	0.532049	1	-0.34697	0.0704129	1
ENSG00000115762		brown	0.603753	9.67963e-05	PLEKHB2	4768.23	-0.315064	0.142091	0.750906	0.102759	0.41737	0.891049	-0.259783	0.0816003	0.554233	0.0103594	0.938102	0.994027	-0.362575	0.0187114	1	-0.0924046	0.507498	1	-0.270172	0.0894613	1
ENSG00000108312		brown	-0.603424	9.78785e-05	UBTF	4004.39	0.36092	0.0945711	0.681653	-0.0648444	0.633588	0.933364	0.289314	0.0679859	0.526578	-0.0858816	0.547745	0.951047	0.354196	0.0304636	1	-0.0210403	0.887755	1	0.375239	0.0260392	1
ENSG00000122678		brown	-0.598105	0.000116916	POLM	1334.01	0.325789	0.18603		-0.0732456	0.686217	0.942802	0.196042	0.32329		-0.247946	0.185656		0.269341	0.184595	1	-0.174731	0.365414	1	0.444078	0.0318245	1
ENSG00000167460		brown	0.595713	0.000126517	TPM4	8179.16	-0.31442	0.0936931	0.678951	-0.188787	0.0683609	0.604137	-0.286035	0.0215813	0.35769	-0.0956785	0.382664	0.906153	-0.0972566	0.450983	1	0.0931122	0.418014	1	-0.19037	0.153945	1
ENSG00000142657		brown	0.593172	0.000137484	PGD	4691.03	-0.389555	0.118792	0.712277	-0.175437	0.198512	0.772828	-0.331112	0.0372642	0.442092	-0.27539	0.0546061	0.560617	-0.155694	0.342824	1	-0.0999608	0.50372	1	-0.0557339	0.741643	1
ENSG00000131042	Yes	brown	0.591905	0.000143268	LILRB2	4257.4	-0.393603	0.0825599	0.663285	-0.345242	0.0372176	0.505236	-0.318751	0.0865807	0.56363	-0.37051	0.031582	0.484745	0.0264889	0.889712	1	-0.0252734	0.887441	1	0.0517625	0.791216	1
ENSG00000143761		brown	0.590466	0.000150101	ARF1	11483.9	-0.241027	0.21793	0.834015	-0.0647279	0.487329	0.906021	-0.223169	0.0480486	0.47882	-0.133977	0.175095	0.77564	-0.158449	0.176015	1	-0.0692517	0.504558	1	-0.0891975	0.46223	1
ENSG00000004399	Yes	brown	0.590363	0.000150601	PLXND1	4967.73	-0.698541	0.0409655	0.511945	-0.261378	0.107807	0.668639	-0.527578	0.00399571	0.195101	-0.216979	0.199846	0.796359	-0.266251	0.157499	1	0.0444036	0.800256	1	-0.310659	0.107393	1
ENSG00000142197		brown	-0.589567	0.000154515	DOPEY2	2049.51	0.512218	0.0329819	0.485721	-0.0529936	0.711893	0.952092	0.407737	0.0139095	0.309677	0.0700742	0.641175	0.968594	0.460783	0.00703872	1	0.123077	0.432043	1	0.337709	0.0548267	1
ENSG00000134107		brown	0.588304	0.000160914	BHLHE40	6475.71	-0.698609	0.0176094	0.366945	-0.527257	0.0053457	0.236834	-0.494702	0.0154059	0.318159	-0.417054	0.0322568	0.484745	0.032546	0.875843	1	0.110218	0.581685	1	-0.0776741	0.713637	1
ENSG00000136295	Yes	brown	0.587422	0.000165525	TTYH3	4656.79	-0.353457	0.192367	0.813872	0.05399	0.700397	0.945922	-0.276656	0.0892122	0.571137	0.0697436	0.635588	0.968594	-0.330686	0.0489678	1	0.0157562	0.918205	1	-0.346445	0.0450607	1
ENSG00000140688		brown	-0.584412	0.00018216	C16orf58	2091.84	0.61316	0.14514	0.750906	0.0156927	0.932192	0.987762	0.400334	0.0461607	0.469475	0.0192764	0.919298	0.992643	0.384717	0.0607589	1	0.00358222	0.985405	1	0.381141	0.067982	1
ENSG00000167004		brown	0.583402	0.000188069	PDIA3	7077.54	-0.385606	0.0551594	0.579444	-0.250839	0.0353792	0.498112	-0.341724	0.0156287	0.318159	-0.192136	0.126486	0.708656	-0.0908964	0.534323	1	0.0587064	0.655523	1	-0.149604	0.32202	1
ENSG00000137076		brown	0.582072	0.000196115	TLN1	30084.6	-0.180253	0.225947	0.838112	0.0129182	0.860126	0.977286	-0.170783	0.0575138	0.511444	-0.0348792	0.654559	0.969526	-0.183706	0.0491858	1	-0.0477983	0.560133	1	-0.135908	0.160925	1
ENSG00000124942		brown	0.58206	0.000196185	AHNAK	103762	-0.306763	0.0605304	0.592249	0.00230626	0.980064	0.994787	-0.280363	0.0121855	0.288518	0.00383228	0.968761	0.996192	-0.282684	0.0148344	1	0.00152655	0.988151	1	-0.284211	0.0180789	1
ENSG00000143390		brown	-0.580966	0.000203036	RFX5	5314.82	0.596188	0.00034533	0.05744	0.321256	0.00416059	0.216553	0.535148	6.2948e-05	0.0563385	0.28004	0.0180384	0.431668	0.213911	0.122397	1	-0.0412179	0.739677	1	0.255131	0.0747266	1
ENSG00000142102		brown	-0.579914	0.000209821	ATHL1	3025.41	0.534594	0.159329	0.772168	0.447087	0.0284746	0.461273	0.341438	0.108827	0.593181	0.247804	0.233545	0.825435	-0.10566	0.624388	1	-0.19932	0.346982	1	0.0936625	0.667133	1
ENSG00000142227	Yes	brown	0.579811	0.000210499	EMP3	7504.18	-0.31313	0.215232	0.832565	0.0333192	0.783684	0.965417	-0.267146	0.0628784	0.516295	-0.0707522	0.580279	0.955446	-0.30049	0.0431194	1	-0.104077	0.436842	1	-0.196415	0.200397	1
ENSG00000169155		brown	0.579002	0.000215868	ZBTB43	1051.97	-0.874191	0.0883484		-0.308419	0.128357	0.693345	-0.517908	0.0147164		-0.364331	0.0782977		-0.209559	0.330445	1	-0.0559261	0.790993	1	-0.153637	0.479866	1
ENSG00000124126		brown	0.577142	0.000228687	PREX1	16210.4	-0.101426	0.193948	0.813872	-0.151424	0.101564	0.660226	-0.0981211	0.381259	0.836339	-0.19344	0.0485333	0.552273	0.053305	0.646581	1	-0.0420175	0.683332	1	0.0953228	0.428765	1
ENSG00000089154		brown	-0.577094	0.000229026	GCN1L1	3988.86	0.43066	0.146619	0.752532	0.126394	0.369691	0.87217	0.350497	0.031852	0.426759	0.0288409	0.845262	0.985586	0.224132	0.183425	1	-0.0975616	0.52647	1	0.321697	0.0635696	1
ENSG00000108179		brown	0.576208	0.000235382	PPIF	3487.51	-0.333538	0.216258	0.832944	-0.227155	0.202529	0.775224	-0.258629	0.187381	0.678847	-0.373964	0.042592	0.528506	-0.0314828	0.875431	1	-0.146833	0.440298	1	0.115351	0.573354	1
ENSG00000100368	Yes	brown	0.574993	0.00024435	CSF2RB	4755.48	-0.416901	0.145661	0.750906	-0.195109	0.161616	0.741626	-0.349146	0.0310162	0.42488	-0.225785	0.122656	0.706594	-0.154058	0.356435	1	-0.0306784	0.840578	1	-0.123381	0.47311	1
ENSG00000114867		brown	0.574198	0.000250379	EIF4G1	9530.4	-0.300515	0.164833	0.777505	-0.00922946	0.93128	0.987612	-0.26834	0.0364487	0.441988	-0.11477	0.310557	0.875545	-0.259127	0.0512	1	-0.105545	0.373763	1	-0.153583	0.263956	1
ENSG00000147168	Yes	brown	-0.572363	0.00026481	IL2RG	4951.08	0.457131	0.0363656	0.496406	0.317865	0.0183454	0.387056	0.389325	0.0133121	0.303937	0.158906	0.261748	0.851253	0.0714732	0.65988	1	-0.158971	0.281981	1	0.230446	0.168471	1
ENSG00000069424		brown	0.572244	0.000265773	KCNAB2	10227.1	-0.0460637	0.260574	0.864108	-0.201351	0.04835	0.533003	-0.0463413	0.70568	0.945576	-0.0665994	0.537244	0.949333	0.155016	0.22295	1	0.134756	0.234123	1	0.0202599	0.8777	1
ENSG00000211598		brown	-0.565912	0.000321645	IGKV4-1	643.443	0.748602	0.0894051		-0.304731	0.162958		0.215149	0.301605		-0.121289	0.575128		0.520069	0.0116557	1	0.183509	0.392615	1	0.33657	0.0981491	1
ENSG00000234882		brown	0.565449	0.000326115	EIF3EP1	1368.52	-0.688805	0.0896432	0.669057	-0.0765919	0.660061	0.934252	-0.466208	0.0157124	0.318159	-0.0155148	0.931501	0.993705	-0.389698	0.0488196	1	0.0610868	0.743238	1	-0.450792	0.0256313	1
ENSG00000183696		brown	0.565279	0.000327767	UPP1	794.023	-1.45711	0.0962947		-0.117737	0.583848		-0.40841	0.0423928		-0.40102	0.0580503		-0.290807	0.141909	1	-0.283398	0.17412	1	-0.00741014	0.969589	1
ENSG00000143549		brown	0.565063	0.000329884	TPM3	22133.3	-0.180318	0.195306	0.813872	0.0218825	0.772268	0.964012	-0.170482	0.0656764	0.522828	-0.0675036	0.401004	0.91466	-0.192371	0.0455188	1	-0.0893879	0.29053	1	-0.102983	0.302261	1
ENSG00000163466		brown	0.564425	0.000336193	ARPC2	18485	-0.33825	0.0550748	0.579444	-0.108745	0.238897	0.803575	-0.312433	0.00523992	0.205436	-0.0947644	0.333062	0.88534	-0.203699	0.0793191	1	0.0139813	0.891856	1	-0.217681	0.0703548	1
ENSG00000146729		brown	0.561849	0.0003628	GBAS	1907.32	-0.795259	0.0326734	0.484278	-0.0506724	0.767752	0.963474	-0.545979	0.00424434	0.197848	-0.0653385	0.713639	0.973822	-0.495405	0.0114058	1	-0.0146661	0.936507	1	-0.480746	0.0162878	1
ENSG00000034152		brown	0.560761	0.000374586	MAP2K3	4017.55	-0.628793	0.0290546	0.449946	-0.309497	0.0470031	0.531895	-0.497817	0.00499745	0.203306	-0.301978	0.0633626	0.595689	-0.188356	0.302035	1	0.00751907	0.964504	1	-0.195877	0.295523	1
ENSG00000168769		brown	0.559438	0.000389384	TET2	4944.95	-0.40733	0.00778112	0.273008	-0.35946	0.00569172	0.241601	-0.360544	0.0180721	0.339344	-0.374559	0.00616305	0.287818	-0.00108859	0.994489	1	-0.015101	0.915822	1	0.0140122	0.931288	1
ENSG00000197956		brown	0.558663	0.000398293	S100A6	9494.9	-0.297798	0.0414663	0.512797	0.128968	0.231505	0.795687	-0.259347	0.0445747	0.46783	0.0254898	0.823022	0.983469	-0.38834	0.00369136	1	-0.103482	0.386398	1	-0.28486	0.0395025	1
ENSG00000132205		brown	0.55804	0.000405582	EMILIN2	7102.84	-0.292843	0.112326	0.700793	-0.354457	0.0183729	0.387056	-0.249446	0.147632	0.636704	-0.221562	0.158682	0.764991	0.105017	0.554029	1	0.132906	0.41632	1	-0.0278891	0.878414	1
ENSG00000060558		brown	0.556473	0.000424462	GNA15	2057.75	-0.715025	0.0215724	0.403674	-0.20414	0.181871	0.758543	-0.554371	0.00151125	0.130054	-0.14346	0.369216	0.903076	-0.350288	0.0515572	1	0.0606865	0.714831	1	-0.41098	0.0260881	1
ENSG00000178927		brown	-0.556271	0.000426941	C17orf62	6458.19	0.350043	0.14467	0.750906	0.191174	0.14531	0.714159	0.303237	0.0486127	0.479167	0.254305	0.065429	0.598446	0.112077	0.48052	1	0.0631363	0.661396	1	0.0489412	0.765069	1
ENSG00000125505		brown	0.554407	0.000450529	MBOAT7	4227.67	-0.485056	0.204889	0.822303	-0.041813	0.795128	0.967794	-0.364167	0.0453717	0.46783	-0.191485	0.25377	0.847478	-0.322404	0.0848085	1	-0.149688	0.389758	1	-0.172718	0.36762	1
ENSG00000140931		brown	0.552042	0.000482116	CMTM3	3736.86	-0.425169	0.172445	0.787253	-0.160465	0.353561	0.865511	-0.321302	0.0942712	0.582855	-0.364636	0.0420842	0.527391	-0.160867	0.41382	1	-0.2042	0.270744	1	0.0433334	0.829397	1
ENSG00000186063		brown	-0.551333	0.000491966	AIDA	849.792	-0.32294	0.239216		-0.448293	0.0399224		-0.204415	0.342208		-0.234954	0.282464		0.24395	0.256923	1	0.213402	0.330434	1	0.0305492	0.886659	1
ENSG00000167850	Yes	brown	0.549924	0.000512066	CD300C	1883.1	-0.463548	0.044839	0.524406	0.327799	0.0839453	0.624438	-0.23516	0.250121	0.730268	0.178743	0.359667	0.899835	-0.563081	0.00693401	1	-0.149075	0.456892	1	-0.414014	0.0506988	1
ENSG00000115904		brown	-0.547658	0.000545928	SOS1	1800.51	0.535106	0.0966155	0.686551	0.153195	0.329958	0.857017	0.420021	0.0186768	0.344912	0.27301	0.0960714	0.671749	0.266865	0.146344	1	0.119828	0.481735	1	0.147039	0.435199	1
ENSG00000067836		brown	0.546387	0.000565786	ROGDI	2693.74	-0.698384	0.0948637	0.681653	-0.0588835	0.740788	0.958291	-0.458454	0.0193336	0.347552	0.000712463	0.996914	0.999531	-0.399658	0.0464029	1	0.059606	0.753781	1	-0.459272	0.024842	1
ENSG00000140853		brown	-0.544648	0.000593985	NLRC5	6600.63	-0.0162936	0.202064	0.818355	-0.267212	0.125996	0.691763	-0.0194306	0.919948	0.98543	0.123532	0.494851	0.937532	0.247815	0.211006	1	0.390796	0.0365762	1	-0.142983	0.47969	1
ENSG00000183576		brown	0.544138	0.000602496	SETD3	1945.77	-0.699644	0.0115501	0.314485	0.175708	0.295097	0.841781	-0.475102	0.0114316	0.288352	-0.0128646	0.941204	0.994027	-0.650922	0.000735014	1	-0.188592	0.296245	1	-0.462337	0.0190784	1
ENSG00000089041	Yes	brown	0.544091	0.000603282	P2RX7	1678.38	-1.21972	0.00661792	0.258444	-0.306571	0.113176	0.679835	-0.733447	0.000395321	0.0982811	-0.220675	0.266646	0.85482	-0.427006	0.0428326	1	0.0859116	0.673128	1	-0.512928	0.016464	1
ENSG00000107290		brown	-0.540248	0.000670995	SETX	6750.65	0.227459	0.158001	0.772168	0.177923	0.169341	0.746097	0.203498	0.180473	0.672452	0.297758	0.0287926	0.470245	0.0255782	0.870596	1	0.119844	0.399596	1	-0.0942663	0.560424	1
ENSG00000117868		brown	0.534601	0.000782738	ESYT2	4855.5	-0.519154	0.0239421	0.421663	-0.0318736	0.801188	0.968799	-0.439953	0.00315987	0.188539	-0.174835	0.189573	0.786955	-0.408118	0.00808115	1	-0.14297	0.304748	1	-0.265151	0.0953281	1
ENSG00000172071		brown	-0.534351	0.000788037	EIF2AK3	1079.66	-0.112803	0.208086		-0.286585	0.185242	0.763517	-0.122943	0.569423		-0.433526	0.0463452		0.16369	0.450232	1	-0.146991	0.502306	1	0.310689	0.151511	1
ENSG00000227372		brown	-0.533705	0.000801898	TP73-AS1	1028.13	0.567521	0.0294222		-0.219632	0.219356	0.785208	0.371789	0.0585635		0.0214428	0.907693		0.591523	0.00328472	1	0.241108	0.206299	1	0.35042	0.0876618	1
ENSG00000163220		brown	0.533294	0.000810834	S100A9	13240.1	-0.502132	0.0504104	0.558013	-0.448377	0.00950918	0.30049	-0.380851	0.0472497	0.474087	-0.193621	0.280231	0.859368	0.0675239	0.731507	1	0.254789	0.169214	1	-0.187267	0.351601	1
ENSG00000213585		brown	0.533287	0.000810985	VDAC1	2797.55	-0.446967	0.040119	0.508968	0.0207255	0.869572	0.979819	-0.371329	0.012532	0.293617	0.05371	0.686096	0.973822	-0.392093	0.010765	1	0.0329879	0.812293	1	-0.425084	0.00736298	1
ENSG00000150961		brown	0.532216	0.000834679	SEC24D	1381.63	-0.641249	0.242989	0.852311	-0.139498	0.457283	0.898768	-0.404385	0.0464754	0.471604	-0.0597316	0.757275	0.973822	-0.264957	0.201221	1	0.0797797	0.687983	1	-0.344743	0.101914	1
ENSG00000109113		brown	0.530069	0.000884026	RAB34	1452.14	-0.733133	0.11562	0.708392	-0.3702	0.0617539	0.577724	-0.449499	0.0321539	0.428241	-0.151044	0.456465	0.922204	-0.0793378	0.709881	1	0.219198	0.29062	1	-0.298542	0.166688	1
ENSG00000139505		brown	0.529944	0.000886985	MTMR6	1113.21	-0.924375	0.0225435		-0.192585	0.33993	0.859404	-0.477491	0.0241694		0.165315	0.422323		-0.285012	0.184781	1	0.357971	0.0886264	1	-0.642996	0.00306554	1
ENSG00000172216		brown	0.526132	0.000981265	CEBPB	2030.37	-0.541578	0.0604668	0.592249	0.0710015	0.704595	0.948128	-0.352779	0.081983	0.554542	-0.355043	0.0657349	0.598446	-0.423865	0.0406424	1	-0.426114	0.0316758	1	0.0022479	0.991482	1
ENSG00000239713		brown	-0.525929	0.000986532	APOBEC3G	1101.16	0.516872	0.178911		0.235929	0.158186	0.734501	0.392952	0.0358406		0.239334	0.168453		0.157053	0.413839	1	0.00340611	0.984896	1	0.153649	0.434621	1
ENSG00000171314		brown	0.525917	0.000986842	PGAM1	2633.01	-0.573116	0.202317	0.818355	-0.150913	0.373416	0.874946	-0.412168	0.0294025	0.412465	-0.119182	0.49848	0.940033	-0.261308	0.178372	1	0.031735	0.86172	1	-0.293047	0.139947	1
ENSG00000196510		brown	-0.525774	0.000990552	ANAPC7	983.784	0.807956	0.0222401		-0.11195	0.577636	0.917108	0.472665	0.0253463		0.295312	0.150414		0.584749	0.00642704	1	0.407344	0.0520192	1	0.177409	0.413384	1
ENSG00000143162		brown	0.523909	0.00104023	CREG1	2925.75	-0.425553	0.0120011	0.314485	-0.430481	0.00594838	0.244399	-0.358781	0.0437687	0.46783	-0.443618	0.00660517	0.290589	0.0717029	0.695366	1	-0.0131409	0.938258	1	0.0848443	0.651507	1
ENSG00000196498		brown	0.519272	0.00117343	NCOR2	9286.37	-0.343989	0.0253715	0.433446	-0.174252	0.104781	0.666247	-0.313895	0.0147317	0.316944	-0.292096	0.0101273	0.343489	-0.139653	0.294948	1	-0.11785	0.322399	1	-0.0218033	0.874404	1
ENSG00000173193		brown	-0.51722	0.00123701	PARP14	5738.49	0.214951	0.155951	0.772168	-0.28293	0.092914	0.64288	0.136096	0.469685	0.866024	-0.0374596	0.830453	0.98438	0.419087	0.0300695	1	0.245499	0.1752	1	0.17359	0.379715	1
ENSG00000085719		brown	0.517167	0.00123869	CPNE3	2398.48	-0.558867	0.130214	0.741181	-0.0600109	0.702297	0.947052	-0.421661	0.0181225	0.339344	-0.113702	0.487656	0.937532	-0.361707	0.0488046	1	-0.0536955	0.752285	1	-0.308015	0.101899	1
ENSG00000178741		brown	0.517158	0.00123898	COX5A	2555.19	-0.360842	0.0367709	0.498907	0.00142369	0.992818	0.997321	-0.250725	0.162358	0.650545	0.292933	0.0757205	0.61808	-0.252194	0.171842	1	0.291542	0.0886185	1	-0.543742	0.00406691	1
ENSG00000010671		brown	-0.516957	0.00124536	BTK	6166.88	0.387936	0.144282	0.750906	0.178662	0.160338	0.738463	0.334327	0.0255126	0.386158	0.140663	0.293688	0.86607	0.155682	0.314327	1	-0.0380013	0.786044	1	0.193685	0.224947	1
ENSG00000271268		brown	0.516802	0.00125033	AC015849.14	248.511	-1.90121	0.0915061		0.112654	0.58404		-0.272515	0.147765		-0.13202	0.511043		-0.385353	0.0359622	1	-0.244773	0.212257	1	-0.140587	0.432356	1
ENSG00000091164		brown	0.516606	0.00125662	TXNL1	1189.77	-1.09607	0.00869048		-0.0123719	0.94865	0.992178	-0.620428	0.00261035		0.025659	0.896557		-0.608221	0.00378016	1	0.0380401	0.850954	1	-0.646275	0.00243079	1
ENSG00000123091		brown	0.516569	0.00125782	RNF11	1184.21	-0.886708	0.0318475		0.0225022	0.907906	0.985007	-0.523987	0.0116153		-0.29979	0.133069		-0.546623	0.00971008	1	-0.32235	0.11492	1	-0.224279	0.295381	1
ENSG00000072062		brown	0.515584	0.00128988	PRKACA	3439.66	-0.347499	0.00342516	0.18759	0.182971	0.117066	0.682585	-0.298866	0.0313303	0.42488	-0.170732	0.165965	0.772054	-0.48187	0.000795974	1	-0.353722	0.0061117	1	-0.12815	0.388014	1
ENSG00000167703	Yes	brown	0.514163	0.00133738	SLC43A2	4462.72	-0.49076	0.0829734	0.665417	-0.201185	0.142972	0.71384	-0.406511	0.0109981	0.288352	-0.111919	0.437608	0.918704	-0.205354	0.213396	1	0.089273	0.552827	1	-0.29463	0.0829892	1
ENSG00000140400		brown	0.513189	0.00137083	MAN2C1	7859.92	-0.409139	0.257755	0.860942	-0.129925	0.365599	0.86864	-0.333287	0.0445931	0.46783	-0.157442	0.295455	0.86607	-0.20339	0.234648	1	-0.0275198	0.860655	1	-0.175872	0.317759	1
ENSG00000103472		brown	0.509181	0.00151635	RRN3P2	475.021	-0.601803	0.17766		-0.262496	0.229621		-0.283244	0.174321		-0.475761	0.0280022		-0.0207606	0.919903	1	-0.213352	0.320705	1	0.192597	0.344669	1
ENSG00000102753		brown	0.508603	0.00153842	KPNA3	2060.8	-0.696879	0.0175027	0.366945	-0.322217	0.043909	0.525829	-0.542193	0.00274163	0.165794	-0.33845	0.0423091	0.527391	-0.220018	0.237205	1	-0.0162355	0.925221	1	-0.203786	0.285497	1
ENSG00000131724	Yes	brown	0.505394	0.00166616	IL13RA1	10392.3	-0.296621	0.139455	0.750906	0.0792349	0.531867	0.909108	-0.24972	0.094142	0.582855	-0.137422	0.30308	0.868425	-0.328983	0.0329058	1	-0.21667	0.120297	1	-0.112314	0.480239	1
ENSG00000162241		brown	-0.503181	0.0017596	SLC25A45	1153.74	0.672053	0.129755		0.033499	0.861483	0.977286	0.429955	0.0368515		0.239899	0.223873		0.39654	0.05888	1	0.206435	0.307598	1	0.190108	0.372242	1
ENSG00000158092		brown	-0.502899	0.00177179	NCK1	882.128	0.892903	0.0189222		0.0485673	0.79709		0.578264	0.00456755		0.155944	0.422443		0.529804	0.010873	1	0.107393	0.590736	1	0.422418	0.0457068	1
ENSG00000129657		brown	0.502046	0.00180924	SEC14L1	3887.95	-0.244632	0.199112	0.816513	-0.197965	0.160059	0.737776	-0.213521	0.191151	0.681876	-0.298724	0.0432549	0.530317	-0.0155594	0.926443	1	-0.100768	0.513063	1	0.0852092	0.623252	1
ENSG00000141401		brown	0.501029	0.00185481	IMPA2	2443.92	-0.435371	0.0809752	0.659194	0.191578	0.261294	0.821949	-0.277061	0.144933	0.636317	0.164815	0.351883	0.899442	-0.468722	0.016209	1	-0.0267636	0.883798	1	-0.441964	0.0265852	1
ENSG00000115935		brown	-0.500338	0.00188634	WIPF1	6615.8	0.261074	0.0968661	0.687085	0.180509	0.142188	0.713657	0.234743	0.106144	0.593019	0.307471	0.0176596	0.427075	0.0542385	0.718115	1	0.12697	0.348836	1	-0.0727321	0.639099	1
ENSG00000101493		brown	0.499773	0.00191246	ZNF516	3118.32	-0.473985	0.164926	0.777505	-0.127792	0.444006	0.89621	-0.335189	0.0731572	0.541035	0.0857461	0.621251	0.967842	-0.207441	0.280089	1	0.213565	0.234706	1	-0.421011	0.0321593	1
ENSG00000167565		brown	0.498672	0.00196428	SERTAD3	1052.14	-0.875373	0.113394		-0.0248096	0.901138	0.985007	-0.477676	0.023377		-0.114918	0.573615		-0.452994	0.0342763	1	-0.0901244	0.665771	1	-0.362878	0.0936646	1
ENSG00000074842		brown	0.498491	0.00197292	MYDGF	2002.97	-0.678898	0.013116	0.333598	-0.123941	0.425834	0.891049	-0.505182	0.00436498	0.201374	0.088939	0.58404	0.956349	-0.381307	0.0365597	1	0.212903	0.207107	1	-0.594217	0.00149515	1
ENSG00000114439		brown	-0.495765	0.00210704	BBX	2891.01	0.345809	0.106785	0.69074	0.0875053	0.548292	0.909699	0.269502	0.108642	0.593019	-0.154204	0.312482	0.875545	0.182024	0.293221	1	-0.241732	0.12834	1	0.42376	0.0173311	1
ENSG00000004139		brown	-0.495031	0.00214448	SARM1	592.003	1.1393	0.113674		0.469259	0.0296668		0.39366	0.052143		0.186731	0.379956		-0.075613	0.704968	1	-0.282625	0.178091	1	0.207019	0.291458	1
ENSG00000166197		brown	-0.491405	0.00233816	NOLC1	2977.52	0.455713	0.0370239	0.500826	0.0320468	0.795002	0.967794	0.38909	0.00753812	0.251119	0.0523244	0.687218	0.973822	0.357074	0.0177378	1	0.020278	0.881395	1	0.336798	0.0302614	1
ENSG00000176022		brown	-0.489359	0.0024541	B3GALT6	662.992	1.16313	0.0185084		0.520225	0.014075		0.644194	0.00284018		0.4205	0.0498707		0.124017	0.56867	1	-0.0997454	0.645889	1	0.223767	0.305587	1
ENSG00000167553		brown	0.488907	0.00248035	TUBA1C	2092.69	-0.468088	0.063588	0.602796	-0.413448	0.0131053	0.343515	-0.36348	0.051678	0.490996	-0.178406	0.303124	0.868425	0.0499638	0.794496	1	0.23507	0.190213	1	-0.185108	0.345633	1
ENSG00000135404	Yes	brown	0.488522	0.00250293	CD63	4864.99	-0.386557	0.185591	0.809838	0.00375053	0.978576	0.994787	-0.306498	0.0587228	0.511444	0.0478557	0.743962	0.973822	-0.310287	0.0636761	1	0.0441099	0.772782	1	-0.3544	0.0396223	1
ENSG00000105393		brown	-0.487295	0.00257608	BABAM1	1093.81	0.600825	0.230333		0.0845177	0.65213	0.933364	0.397953	0.0498862		0.195183	0.3121		0.313501	0.130182	1	0.110683	0.577081	1	0.202821	0.335578	1
ENSG00000130052		brown	0.485911	0.0026608	STARD8	1046.39	-0.977496	0.0978056		-0.121775	0.564961	0.916269	-0.489205	0.0233727		-0.365577	0.087895		-0.367551	0.0911221	1	-0.243864	0.260978	1	-0.123692	0.571215	1
ENSG00000164405		brown	0.485576	0.00268168	UQCRQ	1045.61	-0.64563	0.0917533		0.0546208	0.756674	0.962365	-0.4301	0.0271871		-0.121686	0.505087		-0.484814	0.0150578	1	-0.176329	0.349511	1	-0.30849	0.129623	1
ENSG00000156983		brown	0.485502	0.00268629	BRPF1	2155.32	-0.775976	0.0479696	0.541285	-0.32063	0.0817288	0.624438	-0.534725	0.00769341	0.251119	-0.354971	0.0617746	0.585681	-0.214151	0.296252	1	-0.0343473	0.860624	1	-0.179808	0.388959	1
ENSG00000167378		brown	0.485487	0.00268721	IRGQ	677.231	-1.13216	0.0434831		-0.184755	0.387544		-0.470669	0.0294481		0.103736	0.63085		-0.286039	0.188467	1	0.288563	0.185846	1	-0.574617	0.0083768	1
ENSG00000151651	Yes	brown	0.484774	0.00273221	ADAM8	18598.1	-0.423493	0.0527201	0.574488	-0.208717	0.0786544	0.62137	-0.370817	0.00843864	0.25865	-0.095587	0.445135	0.918771	-0.162117	0.265784	1	0.113137	0.387892	1	-0.275256	0.0673521	1
ENSG00000185477		brown	0.484358	0.00275874	GPRIN3	2959.51	-0.315993	0.226992	0.838112	-0.375306	0.0397151	0.514572	-0.239577	0.229471	0.710136	-0.171451	0.362849	0.900082	0.135745	0.505455	1	0.203885	0.293501	1	-0.0681413	0.742763	1
ENSG00000101191		brown	-0.482274	0.00289511	DIDO1	3037.5	0.326758	0.163588	0.776425	-0.10207	0.495615	0.906385	0.254846	0.137892	0.625618	0.153622	0.326756	0.884885	0.356958	0.0436843	1	0.255715	0.116626	1	0.101244	0.577585	1
ENSG00000065989		brown	0.481139	0.00297186	PDE4A	1378.75	-0.690437	0.00133019	0.110627	-0.609477	0.00176105	0.145756	-0.505849	0.014926	0.317429	-0.696905	0.000488835	0.0943498	0.103639	0.624213	1	-0.0874524	0.66932	1	0.191094	0.372945	1
ENSG00000084754		brown	0.477389	0.00323801	HADHA	10890.5	-0.233241	0.101437	0.690409	-0.0221621	0.84072	0.97612	-0.21064	0.109994	0.598812	-0.24565	0.0350439	0.491711	-0.18849	0.167329	1	-0.223499	0.0672517	1	0.0350092	0.804127	1
ENSG00000178209		brown	0.477003	0.00326661	PLEC	27203.7	-0.42078	0.0100933	0.30872	-0.0712966	0.456823	0.898768	-0.385761	0.000867695	0.114606	-0.161141	0.112506	0.690624	-0.314481	0.0088498	1	-0.0898473	0.399362	1	-0.224635	0.0710375	1
ENSG00000177192		brown	-0.474328	0.00347048	PUS1	928.034	0.61404	0.15729		0.0220824	0.906443		0.403375	0.047153		0.222754	0.249568		0.381369	0.0659591	1	0.200704	0.312775	1	0.180668	0.391533	1
ENSG00000216285		brown	0.473195	0.00356013	RP11-490H24.5	535.904	-1.67306	0.0904015		-0.142298	0.513854		-0.47267	0.0224487		-0.27073	0.20937		-0.33053	0.106462	1	-0.12848	0.547661	1	-0.202058	0.316871	1
ENSG00000134531	Yes	brown	0.473007	0.00357515	EMP1	2016.89	-0.974708	0.0239414	0.421663	0.270123	0.205706	0.778088	-0.383808	0.0757553	0.542478	-0.12042	0.57652	0.954022	-0.654135	0.00263885	1	-0.390634	0.0730728	1	-0.26351	0.226901	1
ENSG00000055917		brown	-0.472175	0.00364249	PUM2	4755.6	0.438931	0.15003	0.759621	-0.000734487	0.996006	0.998594	0.346773	0.0400396	0.450349	0.068348	0.656337	0.969526	0.34755	0.0458813	1	0.0690877	0.665695	1	0.278465	0.119692	1
ENSG00000100297		brown	-0.471444	0.00370263	MCM5	3259.61	0.020317	0.208647	0.829968	0.258954	0.044067	0.525829	0.027827	0.853902	0.971472	0.0975821	0.470935	0.932809	-0.231144	0.138839	1	-0.161382	0.253745	1	-0.0697633	0.664924	1
ENSG00000119138		brown	0.470567	0.00377583	KLF9	3701.15	-1.02379	0.00294695	0.177918	-0.361242	0.0578566	0.562815	-0.682149	0.000875215	0.114606	-0.588262	0.0026678	0.198325	-0.320992	0.124614	1	-0.227063	0.258756	1	-0.0939326	0.658153	1
ENSG00000159445		brown	-0.469202	0.00389222	THEM4	495.116	1.24476	0.288971		0.191396	0.371444		0.393316	0.0491708		0.24068	0.253119		0.202001	0.304108	1	0.0493032	0.812052	1	0.152703	0.428352	1
ENSG00000157216		brown	0.468823	0.0039251	SSBP3	1178.75	-0.670973	0.151298		-0.111674	0.534055	0.909108	-0.454456	0.0212209		-0.194554	0.294804		-0.342856	0.0893899	1	-0.0828918	0.665123	1	-0.259969	0.206487	1
ENSG00000164609		brown	-0.468481	0.00395501	SLU7	1783.77	0.245817	0.188734	0.810129	-0.288899	0.118018	0.682585	0.139373	0.488174	0.874181	-0.00845261	0.964628	0.996192	0.42835	0.0370512	1	0.28049	0.152748	1	0.147863	0.479403	1
ENSG00000105520		brown	0.46669	0.00411464	LPPR2	934.553	-0.866772	0.0747656		-0.442136	0.0326326		-0.501206	0.0192889		-0.300944	0.152663		-0.0591069	0.785052	1	0.141222	0.509259	1	-0.200334	0.358831	1
ENSG00000125450		brown	-0.461499	0.00460946	NUP85	1431.03	0.727221	0.167262	0.781872	0.110499	0.575011	0.917108	0.442275	0.0344653	0.436463	0.0949735	0.638008	0.968594	0.331855	0.118714	1	-0.0155301	0.940062	1	0.347391	0.106837	1
ENSG00000170458	Yes	brown	0.46077	0.00468282	CD14	1861.27	-0.640501	0.158102	0.772168	-0.197553	0.322518	0.854132	-0.354128	0.0927552	0.582855	0.0938552	0.645748	0.969526	-0.156634	0.464166	1	0.291465	0.162365	1	-0.448108	0.0384224	1
ENSG00000206341		brown	0.45852	0.00491599	HLA-H	875.626	-1.44714	0.00272509		-0.162257	0.448243		-0.687622	0.00146822		-0.611522	0.00463807		-0.525548	0.015669	1	-0.449388	0.0394388	1	-0.0761645	0.726682	1
ENSG00000158062		brown	0.457948	0.00497675	UBXN11	5756.78	-0.228717	0.143176	0.750906	0.0415548	0.739661	0.95814	-0.185688	0.207909	0.696828	0.178915	0.174287	0.77564	-0.227266	0.13605	1	0.13737	0.318437	1	-0.364638	0.0204569	1
ENSG00000089060		brown	0.457622	0.00501173	SLC8B1	1561.55	-0.677828	0.105103	0.69074	0.108539	0.567352	0.916269	-0.400322	0.0503326	0.484541	-0.092187	0.636785	0.968594	-0.508977	0.0146965	1	-0.200757	0.316621	1	-0.308226	0.145862	1
ENSG00000111790		brown	-0.455987	0.00519025	FGFR1OP2	1373.15	0.670311	0.0921702	0.678951	0.215421	0.245243	0.811153	0.445816	0.0269116	0.401905	0.0113874	0.952501	0.994027	0.230449	0.26279	1	-0.204067	0.299444	1	0.434523	0.037994	1
ENSG00000163728		brown	-0.455533	0.00524078	TTC14	1866.97	0.715438	0.0270528	0.442788	0.41446	0.0265579	0.453638	0.509227	0.0119225	0.288352	0.489554	0.0109969	0.349016	0.0947941	0.646607	1	0.0751077	0.70435	1	0.0196873	0.925406	1
ENSG00000122417		brown	-0.455503	0.00524417	ODF2L	371.057	0.68863	0.00778476		-0.38104	0.0779652		0.298132	0.167799		0.249786	0.250785		0.679378	0.00173426	1	0.631006	0.00397114	1	0.0483741	0.823411	1
ENSG00000225200		brown	-0.451822	0.0056701	AB019441.29	211.84	1.19799	0.0379969		0.243233	0.259768		0.579537	0.00735289		0.086177	0.691679		0.336408	0.121159	1	-0.157102	0.473055	1	0.493521	0.0229597	1
ENSG00000115107		brown	0.448003	0.00614313	STEAP3	864.516	-0.934514	0.228189		-0.223308	0.298202		-0.445268	0.0394624		-0.262314	0.225638		-0.222046	0.307004	1	-0.0390173	0.85828	1	-0.183034	0.400322	1
ENSG00000104093		brown	0.44522	0.00650885	DMXL2	1467.64	-0.932422	0.0598819	0.591979	-0.160831	0.415917	0.891049	-0.520018	0.0130726	0.300562	0.000367356	0.998552	0.999531	-0.3593	0.091679	1	0.161229	0.436133	1	-0.52054	0.0158058	1
ENSG00000058866		brown	0.442313	0.00691069	DGKG	404.343	-1.47489	0.0733739		-0.283893	0.194512		-0.516776	0.0136468		-0.421811	0.0520276		-0.232996	0.261935	1	-0.137972	0.522375	1	-0.0950284	0.643344	1
ENSG00000100335		brown	0.441798	0.00698408	MIEF1	1783.84	-0.806789	0.0155403	0.35426	-0.322484	0.0644079	0.587103	-0.586891	0.00237999	0.158936	-0.402627	0.0259003	0.46674	-0.264466	0.181587	1	-0.0801559	0.667735	1	-0.184313	0.361918	1
ENSG00000121749		brown	-0.441384	0.00704346	TBC1D15	1094.22	0.593458	0.0826574		0.113692	0.490224	0.906021	0.447926	0.0155633		0.256884	0.133998		0.334286	0.0788151	1	0.143208	0.420086	1	0.19108	0.32643	1
ENSG00000104765		brown	0.439609	0.00730335	BNIP3L	3590.27	-0.434581	0.0836271	0.666926	-0.0938515	0.439684	0.89386	-0.375527	0.00899108	0.268805	-0.138059	0.280899	0.859368	-0.281702	0.0581723	1	-0.0442099	0.741368	1	-0.237493	0.121892	1
ENSG00000167699		brown	-0.435869	0.00787782	GLOD4	1532.79	0.370632	0.0870493	0.667624	-0.215508	0.238563	0.803132	0.24044	0.228396	0.710136	0.195719	0.299764	0.867764	0.456028	0.0254504	1	0.411289	0.0343757	1	0.04474	0.829558	1
ENSG00000089053		brown	-0.433933	0.0081902	ANAPC5	4709.8	0.357438	0.0661602	0.619012	0.211708	0.124226	0.691681	0.293997	0.0664827	0.522828	-0.0771594	0.593567	0.959725	0.0823045	0.618673	1	-0.288891	0.0553894	1	0.371199	0.0292763	1
ENSG00000143546		brown	0.433931	0.00819039	S100A8	3540.83	-0.50902	0.0355022	0.496406	-0.147485	0.414529	0.891049	-0.318992	0.107314	0.593019	0.253272	0.175112	0.77564	-0.171558	0.397199	1	0.400816	0.0373541	1	-0.572383	0.00557619	1
ENSG00000116478		brown	-0.432599	0.00841133	HDAC1	4277.29	0.433498	0.143863	0.750906	0.0127534	0.928977	0.987114	0.349123	0.0348044	0.436463	0.112447	0.453333	0.919945	0.336408	0.0486263	1	0.0997018	0.523375	1	0.236708	0.177421	1
ENSG00000143622		brown	0.432203	0.00847809	RIT1	1116.98	-0.766223	0.159707		-0.347099	0.090704	0.638207	-0.449654	0.0351446		-0.290119	0.164984		-0.102599	0.635069	1	0.0569909	0.788785	1	-0.159594	0.464166	1
ENSG00000139163		brown	-0.425826	0.00961526	ETNK1	1653.31	0.755077	0.0257693	0.433446	0.285227	0.113827	0.680145	0.521353	0.00839218	0.25865	0.0245112	0.895419	0.991078	0.236179	0.243123	1	-0.260756	0.174885	1	0.496943	0.0159834	1
ENSG00000153944		brown	-0.425504	0.00967612	MSI2	1583.24	0.153614	0.035346	0.496406	-0.474506	0.011972	0.331019	0.0502198	0.805413	0.969096	-0.223665	0.249748	0.840316	0.524825	0.0116351	1	0.250881	0.208927	1	0.273949	0.195001	1
ENSG00000171720		brown	0.421563	0.0104459	HDAC3	3635.47	-0.571183	0.0192194	0.381257	-0.168572	0.20624	0.778088	-0.481254	0.00202767	0.148751	-0.266539	0.0572389	0.566457	-0.312717	0.0521997	1	-0.0979746	0.503189	1	-0.214745	0.195767	1
ENSG00000184900		brown	0.419856	0.0107952	SUMO3	2984.33	-0.443187	0.055609	0.579444	-0.0889466	0.522522	0.908209	-0.369664	0.0221742	0.362152	-0.312569	0.0322587	0.484745	-0.280749	0.0923212	1	-0.22364	0.141791	1	-0.0571099	0.739456	1
ENSG00000066322		brown	0.418346	0.0111123	ELOVL1	2707.42	-0.442831	0.117809	0.710177	0.115446	0.458331	0.898768	-0.321963	0.069279	0.530407	0.0391731	0.809515	0.980099	-0.437473	0.0164559	1	-0.076279	0.651356	1	-0.361198	0.0535899	1
ENSG00000198668		brown	0.416672	0.0114731	CALM1	10721.6	-0.331986	0.0855494	0.667624	-0.0145219	0.888186	0.982118	-0.296223	0.0170504	0.331741	0.0109988	0.919842	0.992643	-0.281719	0.0285877	1	0.0255224	0.82384	1	-0.307243	0.0210608	1
ENSG00000058262		brown	0.412281	0.0124671	SEC61A1	6102.21	-0.27097	0.0476268	0.540131	-0.10323	0.291667	0.840523	-0.251173	0.0335827	0.434342	-0.255013	0.013944	0.388138	-0.147951	0.227374	1	-0.151788	0.163288	1	0.00383714	0.975884	1
ENSG00000215301		brown	0.411018	0.0127662	DDX3X	19271.8	-0.284874	0.107061	0.69074	-0.178749	0.099295	0.658378	-0.259807	0.0453309	0.46783	-0.222276	0.0525182	0.555117	-0.0810647	0.546596	1	-0.0435289	0.717198	1	-0.0375362	0.787242	1
ENSG00000125457		brown	0.410141	0.0129774	MIF4GD	1424.56	-0.582833	0.227784	0.838112	-0.0554291	0.752529	0.961784	-0.396137	0.0414749	0.456546	-0.0886553	0.626343	0.968594	-0.340778	0.0868825	1	-0.0332296	0.859718	1	-0.307553	0.130081	1
ENSG00000111678		brown	-0.408009	0.0135031	C12orf57	852.786	0.524521	0.0816		-0.397836	0.0682109		0.123554	0.551713		-0.0751185	0.727985		0.521587	0.0110884	1	0.32284	0.131569	1	0.198753	0.326509	1
ENSG00000095303		brown	0.407309	0.0136794	PTGS1	3590.54	-0.422758	0.103751	0.69074	-0.0756474	0.541526	0.909699	-0.359528	0.013993	0.309678	-0.0365527	0.77946	0.973822	-0.283909	0.0605887	1	0.0390978	0.774567	1	-0.323009	0.0385808	1
ENSG00000165672		brown	0.407044	0.0137468	PRDX3	2851.19	-0.309441	0.176143	0.791522	0.138381	0.324767	0.854828	-0.240339	0.140401	0.630186	0.0152191	0.91777	0.992643	-0.378761	0.0243223	1	-0.12317	0.422781	1	-0.255593	0.139813	1
ENSG00000116209		brown	0.40703	0.0137504	TMEM59	3574.02	-0.278799	0.153655	0.768018	0.175362	0.240755	0.806012	-0.210001	0.220861	0.705005	-0.0826259	0.597249	0.960717	-0.385408	0.0291904	1	-0.25801	0.112746	1	-0.127399	0.482909	1
ENSG00000105701		brown	0.406866	0.0137922	FKBP8	6171.3	-0.145839	0.164254	0.777306	0.120172	0.269234	0.829516	-0.122367	0.34725	0.816421	0.154017	0.180378	0.776882	-0.242556	0.0720617	1	0.033847	0.778812	1	-0.276404	0.0474892	1
ENSG00000176973		brown	0.405148	0.0142368	FAM89B	348.18	-1.02304	0.113335		0.179022	0.413028		-0.322761	0.132524		-0.0730315	0.73848		-0.501967	0.0191237	1	-0.252123	0.249759	1	-0.249854	0.240992	1
ENSG00000103126		brown	-0.404523	0.0144013	AXIN1	1633.86	0.515263	0.256445	0.860116	0.148936	0.388032	0.883148	0.376443	0.0495083	0.482839	0.19954	0.264851	0.852316	0.227548	0.246839	1	0.0506107	0.784393	1	0.17694	0.378114	1
ENSG00000169991		brown	0.404094	0.0145152	IFFO2	1500.44	-0.498895	0.157918	0.772168	0.116054	0.506293	0.90783	-0.322417	0.0954588	0.582855	0.0547916	0.76206	0.973822	-0.438555	0.0268793	1	-0.0612685	0.743084	1	-0.377292	0.0622143	1
ENSG00000174780		brown	0.403769	0.014602	SRP72	5235.43	-0.425444	0.0383549	0.508968	-0.320894	0.025256	0.439316	-0.348318	0.0356142	0.438131	-0.0164146	0.913024	0.992643	-0.0274375	0.872499	1	0.304505	0.0518064	1	-0.331946	0.059076	1
ENSG00000158793		brown	-0.403277	0.0147343	NIT1	939.308	1.30335	0.062639		0.310276	0.155848		0.584765	0.00646124		0.272777	0.212371		0.274582	0.200361	1	-0.0375098	0.86407	1	0.3121	0.143494	1
ENSG00000138085	Yes	brown	0.402599	0.0149182	ATRAID	1655.36	-0.491861	0.102954	0.69074	-0.187539	0.250555	0.812982	-0.358597	0.0511801	0.489382	0.0742391	0.662131	0.970737	-0.171096	0.365247	1	0.261809	0.137186	1	-0.43291	0.0252882	1
ENSG00000166503		brown	0.402463	0.0149554	HDGFRP3	339.573	-4.00391	0.0451617		-0.159036	0.354318		-0.243319	0.107855		-0.0359381	0.827796		-0.0843392	0.561758	1	0.123157	0.437785	1	-0.207505	0.137641	1
ENSG00000174428		brown	-0.401951	0.0150958	GTF2IRD2B	438.869	0.319211	0.233261		-0.0956085	0.662797		0.0700766	0.741374		-0.340857	0.118511		0.165745	0.432574	1	-0.24534	0.259846	1	0.411097	0.0495534	1
ENSG00000279369		brown	0.400911	0.0153845	RP11-51F16.1	521.234	-0.778211	0.0394051		-0.0518717	0.803767		-0.428933	0.0459441		-0.505274	0.0171365		-0.377167	0.0824074	1	-0.453513	0.0350944	1	0.0763457	0.726797	1
ENSG00000134905		brown	-0.400138	0.0156023	CARS2	2877.43	0.410468	0.160642	0.774914	0.125705	0.418067	0.891049	0.312899	0.0767265	0.545002	-0.073952	0.648208	0.969526	0.187225	0.303444	1	-0.199678	0.235671	1	0.386908	0.0382404	1
ENSG00000133961		brown	0.399895	0.0156712	NUMB	3898.15	-0.363679	0.197488	0.814434	-0.194775	0.136311	0.701438	-0.309909	0.0431915	0.46574	-0.109588	0.425456	0.917971	-0.11515	0.467208	1	0.0851928	0.553084	1	-0.200344	0.219832	1
ENSG00000213923		brown	0.399169	0.0158785	CSNK1E	2223.83	-0.150303	0.216175	0.832944	-0.246493	0.154223	0.724535	-0.13796	0.47251	0.868429	-0.36018	0.0447	0.543566	0.108549	0.581395	1	-0.113706	0.539786	1	0.222258	0.269143	1
ENSG00000066933		brown	-0.398469	0.0160808	MYO9A	1126.44	0.594265	0.172702		0.203805	0.345927	0.862363	0.265841	0.21869		-0.170001	0.434554		0.0620667	0.774708	1	-0.373914	0.0878689	1	0.435991	0.0442263	1
ENSG00000130813		brown	-0.397976	0.0162247	C19orf66	1460.82	0.339193	0.146382	0.752272	-0.199624	0.230094	0.795687	0.230569	0.216332	0.698467	-0.0712355	0.680421	0.973822	0.430257	0.0246645	1	0.128402	0.473531	1	0.301859	0.123521	1
ENSG00000087206		brown	-0.394043	0.0174102	UIMC1	1238.13	0.440716	0.188932		-0.203503	0.305785	0.84829	0.246675	0.240357		0.104388	0.60763		0.450278	0.0349532	1	0.307951	0.138432	1	0.14233	0.510081	1
ENSG00000125835		brown	0.393921	0.0174482	SNRPB	4732.57	-0.200045	0.205683	0.823501	-0.163231	0.162897	0.741842	-0.182722	0.188618	0.679603	-0.244619	0.0475242	0.551322	-0.019494	0.892209	1	-0.0813936	0.528859	1	0.0618998	0.677064	1
ENSG00000266472		brown	-0.393814	0.0174814	MRPS21	1467.31	0.381917	0.217489	0.834015	0.362606	0.0449015	0.52812	0.287239	0.147112	0.636704	0.242427	0.194477	0.791168	-0.0753706	0.709948	1	-0.120194	0.532506	1	0.044824	0.828187	1
ENSG00000119396		brown	-0.392235	0.0179793	RAB14	3021.21	0.368959	0.129427	0.740405	0.223179	0.0804716	0.624438	0.318449	0.0338991	0.436463	0.110105	0.412648	0.917416	0.0952827	0.539153	1	-0.113082	0.420677	1	0.208366	0.192978	1
ENSG00000183914		brown	0.38996	0.0187171	DNAH2	44.587	-7.47799	0.00833212		-0.271691	0.018694		-0.243024	0.0142165		-0.255245	0.0202327		0.028682	0.760132	1	0.0164553	0.874466	1	0.0122271	0.89114	1
ENSG00000117505		brown	0.389427	0.0188935	DR1	3224.44	-0.381697	0.258033	0.860942	0.0960898	0.546669	0.909699	-0.273354	0.130054	0.617172	0.0196918	0.905685	0.992643	-0.3695	0.0465886	1	-0.0764044	0.657762	1	-0.293099	0.123615	1
ENSG00000169696		brown	0.389333	0.0189247	ASPSCR1	1410.85	-0.741475	0.00440079	0.217186	-0.0924037	0.549512	0.909699	-0.551189	0.00175344	0.13766	0.112085	0.486882	0.937532	-0.458863	0.0113835	1	0.204511	0.222185	1	-0.663381	0.000363349	1
ENSG00000002586		brown	0.388326	0.0192623	CD99	4853.59	-0.315873	0.0990936	0.6889	-0.234672	0.0500643	0.538902	-0.282217	0.0467722	0.471859	-0.224355	0.0756669	0.61808	-0.0475519	0.746104	1	0.0103163	0.93779	1	-0.0578687	0.702798	1
ENSG00000255197		brown	0.386939	0.0197357	RP11-750H9.5	1536.16	-0.712589	0.220099	0.836663	-0.268412	0.176585	0.751807	-0.430224	0.0405533	0.452558	-0.184015	0.365246	0.902528	-0.161867	0.448319	1	0.0844129	0.684556	1	-0.246285	0.25432	1
ENSG00000069849	Yes	brown	0.386164	0.0200043	ATP1B3	1563.06	-0.413143	0.0972303	0.687085	-0.308377	0.0668094	0.597939	-0.328629	0.0806929	0.554233	-0.384121	0.0280059	0.46674	-0.0202609	0.916445	1	-0.0757559	0.675526	1	0.0554953	0.778775	1
ENSG00000167085		brown	0.383387	0.0209922	PHB	2335.36	-0.393481	0.0102461	0.30872	-0.0395603	0.796479	0.967794	-0.321237	0.0666476	0.522828	-0.486151	0.00242251	0.198325	-0.28171	0.118237	1	-0.446637	0.0073438	1	0.164928	0.373047	1
ENSG00000118200		brown	0.383	0.0211329	CAMSAP2	116.443	-5.58363	0.0456055		-0.115642	0.430954		-0.166996	0.190363		-0.0226291	0.871988		-0.0513874	0.672681	1	0.0930604	0.48719	1	-0.144454	0.214121	1
ENSG00000013573		brown	-0.382541	0.0213013	DDX11	1057.91	0.238227	0.197086		0.253708	0.240383	0.806012	0.107468	0.619049		-0.205122	0.345564		-0.146268	0.500099	1	-0.458958	0.0361429	1	0.312697	0.149208	1
ENSG00000143322		brown	0.381559	0.0216644	ABL2	883.836	-0.600907	0.0674178		-0.504408	0.0114949		-0.39191	0.0627484		-0.210955	0.301262		0.112508	0.59897	1	0.29351	0.159299	1	-0.181006	0.402923	1
ENSG00000187840		brown	0.377147	0.0233605	EIF4EBP1	1103.51	-0.414502	0.214315		-0.113433	0.565838	0.916269	-0.276514	0.186763		-0.406186	0.044665		-0.163119	0.443691	1	-0.292813	0.157089	1	0.129695	0.547552	1
ENSG00000236850		brown	-0.376045	0.0238011	BMS1P20	181.55	1.35014	0.206935		0.10412	0.624235		0.404977	0.0403304		0.245068	0.240261		0.300977	0.120502	1	0.141002	0.491748	1	0.15998	0.399442	1
ENSG00000100288		brown	-0.376016	0.0238129	CHKB	578.248	0.758195	0.0660645		0.0585004	0.754935		0.493425	0.0150088		0.0986516	0.609316		0.435013	0.0356782	1	0.0401561	0.839626	1	0.394863	0.0607718	1
ENSG00000177879		brown	0.373278	0.0249374	AP3S1	1055.83	-1.20659	0.000681926		-0.264026	0.134534	0.698286	-0.809739	3.24646e-05		-0.118118	0.517896		-0.545845	0.00624127	1	0.145929	0.439112	1	-0.691786	0.000682095	1
ENSG00000102710		brown	-0.372819	0.0251302	SUPT20H	1790.57	0.425403	0.173367	0.787253	0.0653277	0.700462	0.945922	0.297031	0.116867	0.603313	-0.132266	0.453258	0.919945	0.231747	0.233081	1	-0.197621	0.278747	1	0.429373	0.0307246	1
ENSG00000233913		brown	-0.372299	0.0253502	CTC-575D19.1	2115.28	0.279753	0.07973	0.658863	0.0651167	0.717575	0.95296	0.215278	0.275774	0.757988	0.446674	0.0163817	0.416524	0.150185	0.457419	1	0.381614	0.0466975	1	-0.231431	0.261276	1
ENSG00000170542		brown	-0.371946	0.0255001	SERPINB9	1104.98	-0.00661105	0.149315		-0.231295	0.2805	0.832391	-0.0703753	0.744808		-0.464037	0.0318879		0.160968	0.459126	1	-0.232815	0.28633	1	0.393792	0.0705731	1
ENSG00000014257		brown	0.371523	0.0256811	ACPP	1532.6	-0.127522	0.252491	0.854614	-0.122478	0.469395	0.901116	-0.115619	0.540742	0.900058	-0.357284	0.0421906	0.527391	0.00686136	0.97178	1	-0.234839	0.196895	1	0.241703	0.223035	1
ENSG00000131389	Yes	brown	0.371193	0.025823	SLC6A6	4352.56	-0.282742	0.182644	0.802598	-0.057696	0.69697	0.945476	-0.234111	0.169167	0.658333	-0.309412	0.045996	0.547407	-0.176436	0.314665	1	-0.25174	0.118754	1	0.0753049	0.676269	1
ENSG00000125637		brown	-0.368261	0.0271121	PSD4	6848.99	0.439212	0.0766495	0.64584	0.274113	0.0693478	0.604142	0.34989	0.042934	0.464081	0.0118977	0.939903	0.994027	0.0757954	0.670282	1	-0.262241	0.110065	1	0.33804	0.0645085	1
ENSG00000197579		brown	-0.368074	0.0271961	TOPORS	738.06	0.438608	0.180184		-0.0225302	0.908963		0.239366	0.252375		-0.234938	0.244436		0.26196	0.21806	1	-0.212454	0.303622	1	0.474423	0.0276441	1
ENSG00000127511		brown	-0.365492	0.0283775	SIN3B	2826.77	0.52539	0.0580856	0.586208	0.260773	0.0892267	0.632819	0.425188	0.0151991	0.318159	0.333963	0.0372047	0.502994	0.164441	0.361774	1	0.073198	0.660364	1	0.091244	0.622046	1
ENSG00000077235		brown	0.364373	0.0289026	GTF3C1	2372.65	-0.616687	0.0690042	0.630021	-0.185949	0.275078	0.831036	-0.431228	0.0231718	0.369016	0.0526987	0.765723	0.973822	-0.245335	0.207948	1	0.238679	0.192041	1	-0.484021	0.0150887	1
ENSG00000173542		brown	0.363301	0.0294134	MOB1B	2764.1	-0.389551	0.0893224	0.66859	-0.149275	0.308129	0.848735	-0.303848	0.0716812	0.536617	0.118784	0.43852	0.918716	-0.1546	0.373999	1	0.268084	0.0931013	1	-0.422688	0.0180512	1
ENSG00000175826		brown	0.361528	0.0302737	CTDNEP1	3947.12	-0.342271	0.101076	0.690409	0.0745304	0.533774	0.909108	-0.291227	0.040261	0.45042	-0.0413105	0.743641	0.973822	-0.365787	0.0127726	1	-0.115847	0.380795	1	-0.249942	0.0994581	1
ENSG00000102081		brown	-0.354732	0.0337658	FMR1	1517.02	-0.027069	0.197159	0.814434	-0.301471	0.0409989	0.521755	-0.035287	0.83522	0.970654	-0.0520636	0.73591	0.973822	0.26621	0.12793	1	0.249429	0.120665	1	0.0167814	0.925601	1
ENSG00000165655		brown	0.354271	0.034014	ZNF503	1417.6	-0.00782617	0.0766309	0.64584	0.272216	0.162812	0.741842	-0.00404332	0.984486	0.995569	-0.265402	0.184636	0.779739	-0.276305	0.191715	1	-0.537718	0.00868405	1	0.261417	0.223085	1
ENSG00000164081		brown	-0.354185	0.0340603	TEX264	1366.08	0.482328	0.0914895	0.678019	0.268289	0.0687873	0.604142	0.395825	0.0195734	0.347552	0.226739	0.141749	0.732763	0.127557	0.465365	1	-0.041553	0.795819	1	0.169112	0.3464	1
ENSG00000079805		brown	0.352935	0.0347418	DNM2	9109.75	-0.161102	0.0607077	0.592692	-0.151674	0.124393	0.691681	-0.153042	0.198698	0.689937	-0.279078	0.00760279	0.301084	-0.00136804	0.991159	1	-0.127409	0.245665	1	0.126041	0.324221	1
ENSG00000134686		brown	0.352072	0.035219	PHC2	2545.94	-0.0882712	0.195961	0.813872	-0.0832618	0.567027	0.916269	-0.0632993	0.705852	0.945576	0.228104	0.134216	0.721893	0.0199589	0.908106	1	0.311393	0.0496154	1	-0.291437	0.101137	1
ENSG00000169246		brown	0.350854	0.035901	NPIPB3	317.218	-0.902642	0.045868		-0.601936	0.00604362		-0.429446	0.0432976		-0.350647	0.108412		0.172538	0.414448	1	0.251373	0.248599	1	-0.0788383	0.706853	1
ENSG00000102931		brown	0.349288	0.0367941	ARL2BP	1709.45	-0.39574	0.102637	0.69074	-0.12046	0.463376	0.89925	-0.278928	0.131207	0.62079	0.181695	0.28776	0.862843	-0.158505	0.403769	1	0.30219	0.0880277	1	-0.4607	0.0177782	1
ENSG00000196396		brown	-0.347951	0.0375706	PTPN1	4217.58	-0.0579055	0.141573	0.750906	-0.290992	0.083151	0.624438	-0.0747378	0.690769	0.93941	-0.348945	0.0455656	0.547407	0.216286	0.262053	1	-0.0579633	0.748355	1	0.274253	0.164482	1
ENSG00000169398		brown	-0.347196	0.0380154	PTK2	768.654	0.261177	0.119476		0.417508	0.0520342		0.150482	0.486474		-0.0572694	0.79153		-0.267085	0.219067	1	-0.474899	0.029823	1	0.207818	0.339384	1
ENSG00000236144		brown	-0.346702	0.0383082	TMEM147-AS1	709.274	0.790341	0.040764		0.188094	0.338137		0.477819	0.0220707		-0.0793481	0.693384		0.289797	0.172302	1	-0.267497	0.194067	1	0.557304	0.00958436	1
ENSG00000169598		brown	0.34609	0.0386738	DFFB	370.366	-1.6591	0.059387		-0.200496	0.360483		-0.521942	0.0138448		-0.149881	0.492296		-0.321603	0.127206	1	0.0506302	0.816005	1	-0.372246	0.074831	1
ENSG00000178982		brown	0.341443	0.0415434	EIF3K	8119.02	-0.125718	0.119208	0.712868	-0.0525261	0.616955	0.928677	-0.118177	0.348529	0.816474	-0.263411	0.0177511	0.427075	-0.065654	0.615259	1	-0.210894	0.0703156	1	0.145241	0.282639	1
ENSG00000077721		brown	0.340817	0.0419427	UBE2A	2168.08	-0.523532	0.010484	0.309762	0.228002	0.166388	0.745795	-0.343468	0.0637114	0.518456	0.24202	0.157986	0.764991	-0.571566	0.00266271	1	0.014024	0.937064	1	-0.585597	0.00264379	1
ENSG00000143226	Yes	brown	0.340624	0.0420665	FCGR2A	2068.11	-0.787207	0.0802351	0.658863	-0.270197	0.169284	0.746097	-0.459626	0.0277661	0.408726	0.0103278	0.959103	0.99529	-0.189498	0.372436	1	0.280577	0.17348	1	-0.470084	0.0289495	1
ENSG00000066827		brown	-0.340294	0.0422791	ZFAT	266.841	1.15975	0.0468853		-0.0264275	0.903336		0.408838	0.0474887		0.405791	0.0592974		0.435429	0.0326535	1	0.432372	0.0423666	1	0.00305797	0.987853	1
ENSG00000138138		brown	-0.33605	0.0450868	ATAD1	927.882	0.665652	0.234306		0.0997858	0.611457		0.412665	0.0480777		0.190833	0.343066		0.312952	0.140577	1	0.0910644	0.658461	1	0.221892	0.302377	1
ENSG00000139218		brown	-0.335601	0.045393	SCAF11	6110.92	0.31098	0.247722	0.852311	0.0813024	0.479431	0.906009	0.273875	0.0452996	0.46783	0.0837947	0.489904	0.937532	0.192588	0.17388	1	0.00249213	0.984355	1	0.190097	0.194001	1
ENSG00000130714		brown	0.334831	0.0459205	POMT1	662.248	-1.00198	0.101338		-0.244962	0.235271		-0.536678	0.0121376		-0.233393	0.266328		-0.291817	0.177812	1	0.011571	0.956798	1	-0.303396	0.164478	1
ENSG00000166750		brown	-0.334649	0.0460462	SLFN5	688.372	1.56629	0.15536		0.197393	0.348913		0.453852	0.0198663		0.188749	0.360773		0.256562	0.179024	1	-0.00864753	0.965953	1	0.265218	0.15547	1
ENSG00000146072	Yes	brown	0.332513	0.0475403	TNFRSF21	649.806	-2.97573	0.00575501		-0.400489	0.0456691		-0.564108	0.00191615		-0.528918	0.00668362		-0.163727	0.354423	1	-0.1285	0.49839	1	-0.0352293	0.837527	1
ENSG00000163131		brown	0.331107	0.0485449	CTSS	29117.8	-0.000356321	0.225134	0.838112	-0.131318	0.159328	0.737393	-0.00112993	0.992021	0.997819	0.0804849	0.41583	0.917971	0.130192	0.266673	1	0.21181	0.0414725	1	-0.0816179	0.50152	1
ENSG00000257923		brown	0.329436	0.0497611	CUX1	3713.8	-0.0894732	0.0388989	0.508968	-0.0529206	0.700627	0.945922	-0.0883112	0.581336	0.913042	-0.405485	0.0050212	0.260961	-0.0353905	0.830484	1	-0.352594	0.019336	1	0.317206	0.06245	1
ENSG00000167962		brown	0.329231	0.0499113	ZNF598	1704.42	-0.537343	0.271776	0.866374	-0.132374	0.440015	0.89386	-0.382559	0.0449576	0.46783	-0.116549	0.51237	0.945551	-0.250235	0.200964	1	0.0158276	0.931439	1	-0.266067	0.183371	1
ENSG00000093010		brown	0.327873	0.0509204	COMT	2721.45	0.0420795	0.16083	0.774986	0.0895849	0.538006	0.909699	0.0494404	0.768175	0.964141	0.327202	0.0317166	0.484745	-0.0401518	0.816384	1	0.237639	0.134096	1	-0.277793	0.118173	1
ENSG00000179526		brown	-0.32778	0.0509895	SHARPIN	1188.1	0.50324	0.0921553		0.2149	0.22664	0.791028	0.3746	0.0556943		0.426547	0.0203833		0.15973	0.425489	1	0.211678	0.26464	1	-0.0519475	0.799434	1
ENSG00000074356		brown	-0.326058	0.0522929	C17orf85	2402.47	0.453949	0.141573	0.750906	-0.040297	0.795915	0.967794	0.342352	0.0534653	0.499493	0.0220225	0.892283	0.991078	0.382701	0.0359344	1	0.0623245	0.71218	1	0.32038	0.0869812	1
ENSG00000105472		brown	0.325258	0.0529077	CLEC11A	295.325	-1.34979	0.0306582		-0.411962	0.0599621		-0.432522	0.0396613		0.0350063	0.872129		-0.0205995	0.921323	1	0.447117	0.0386868	1	-0.467731	0.0233563	1
ENSG00000214653		brown	0.323307	0.0544306	HNRNPA3P3	120.593	0.445707	0.210671		0.303277	0.124182		0.166048	0.351301		0.377518	0.0488596		-0.13729	0.427384	1	0.074272	0.690005	1	-0.211569	0.207492	1
ENSG00000119185		brown	0.320138	0.0569787	ITGB1BP1	1268.05	-0.354992	0.0833477		0.271986	0.143381	0.71384	-0.20933	0.299724		-0.125435	0.512756		-0.481406	0.0195271	1	-0.397481	0.0437316	1	-0.0839274	0.68905	1
ENSG00000113273		brown	0.320064	0.057039	ARSB	1607.9	-0.699572	0.174685	0.788621	0.0116691	0.951694	0.992526	-0.403831	0.050424	0.484541	-0.0166873	0.932779	0.993705	-0.415606	0.048134	1	-0.0283592	0.888834	1	-0.387254	0.069585	1
ENSG00000125952		brown	-0.319035	0.0578874	MAX	1977.79	0.192608	0.211682	0.831	0.0978404	0.574991	0.917108	0.157995	0.413559	0.848939	0.371164	0.0401029	0.514246	0.0601622	0.761255	1	0.273361	0.143334	1	-0.213201	0.291655	1
ENSG00000175354		brown	-0.318486	0.0583443	PTPN2	2493.81	0.588589	0.028673	0.447119	0.159128	0.262363	0.821949	0.482683	0.00331137	0.189136	0.194696	0.190857	0.788629	0.323595	0.0562631	1	0.0355703	0.818607	1	0.288027	0.0986653	1
ENSG00000114573		brown	0.317629	0.0590623	ATP6V1A	3637.31	-0.449581	0.212766	0.832565	0.0479332	0.763978	0.962503	-0.3254	0.0718287	0.536617	0.00699497	0.966472	0.996192	-0.373391	0.0445475	1	-0.040941	0.81259	1	-0.332454	0.0810146	1
ENSG00000149136		brown	-0.315361	0.0609972	SSRP1	3926.8	0.363808	0.106478	0.69074	0.0856785	0.443193	0.895836	0.322905	0.015448	0.318159	0.108345	0.35866	0.899835	0.237244	0.0857583	1	0.0226672	0.854564	1	0.214578	0.132801	1
ENSG00000160445		brown	-0.315186	0.0611491	ZER1	1446.61	0.534538	0.108311	0.691066	-0.134045	0.468551	0.901116	0.345423	0.0859012	0.563084	0.135714	0.476686	0.932809	0.479557	0.0196098	1	0.269801	0.169203	1	0.20976	0.315834	1
ENSG00000071246		brown	0.314875	0.0614182	VASH1	2723.37	-0.672715	0.0703623	0.630501	-0.326793	0.117347	0.682585	-0.340806	0.112724	0.601685	0.124784	0.555872	0.952099	-0.0140422	0.948437	1	0.451679	0.0357711	1	-0.465732	0.0330501	1
ENSG00000197894		brown	0.313406	0.0627052	ADH5	1500.82	-0.795934	0.0199036	0.387879	-0.037272	0.832356	0.975781	-0.517909	0.0077624	0.251119	0.0998964	0.583795	0.956349	-0.480742	0.0158408	1	0.137189	0.466187	1	-0.617941	0.0023772	1
ENSG00000135974		brown	-0.306129	0.0693971	C2orf49	821.637	1.0674	0.0743723		0.186935	0.381513		0.551952	0.0106635		0.322629	0.134781		0.365124	0.0932617	1	0.135729	0.533566	1	0.2294	0.292743	1
ENSG00000175938		brown	0.302718	0.0727213	ORAI3	503.966	-1.12035	0.0739967		0.215213	0.325857		-0.304143	0.154889		0.0646143	0.767678		-0.519558	0.0147962	1	-0.150638	0.490926	1	-0.368932	0.0814593	1
ENSG00000144659		brown	-0.302513	0.0729248	SLC25A38	955.035	0.155972	0.0134835		-0.136687	0.452304		0.0612875	0.757986		-0.544245	0.00377569		0.198018	0.330319	1	-0.407629	0.0352488	1	0.605656	0.0034778	1
ENSG00000227039		brown	0.299754	0.0757084	ITGB2-AS1	2583.82	-0.449198	0.0593662	0.591161	0.141472	0.339364	0.859404	-0.342268	0.0443841	0.46783	-0.0552963	0.721236	0.973822	-0.4838	0.00581878	1	-0.196785	0.222387	1	-0.287019	0.111408	1
ENSG00000140319		brown	0.297759	0.0777733	SRP14	4767.83	-0.234993	0.101376	0.690409	0.0476705	0.577283	0.917108	-0.217652	0.0367489	0.442092	-0.0436236	0.630927	0.968594	-0.265333	0.0141537	1	-0.0912964	0.338795	1	-0.174038	0.12069	1
ENSG00000111203		brown	-0.296535	0.0790611	ITFG2	1477.52	0.176458	0.181997	0.802598	-0.281143	0.106439	0.667504	0.107851	0.576151	0.913042	0.043253	0.810591	0.98033	0.389053	0.0491328	1	0.324439	0.0818993	1	0.0646159	0.748968	1
ENSG00000133316		brown	0.295061	0.0806347	WDR74	1535.58	-0.37118	0.00891702	0.289304	-0.251214	0.13292	0.697184	-0.308817	0.0991149	0.587433	-0.59823	0.000578432	0.0943498	-0.0576116	0.764434	1	-0.347064	0.0538433	1	0.289455	0.141229	1
ENSG00000135932		brown	0.294796	0.0809196	CAB39	3964.36	-0.445892	0.0113406	0.314485	-0.0581032	0.600448	0.922227	-0.397213	0.00273496	0.165794	-0.249478	0.0333424	0.487556	-0.339133	0.0135124	1	-0.191384	0.11928	1	-0.147751	0.298042	1
ENSG00000123064		brown	0.293911	0.0818777	DDX54	3426.28	-0.317169	0.140095	0.750906	-0.287298	0.0386116	0.509152	-0.267887	0.0969348	0.583042	-0.081149	0.577668	0.95425	0.019406	0.907256	1	0.206165	0.174993	1	-0.18676	0.276104	1
ENSG00000127483		brown	-0.290964	0.0851335	HP1BP3	6182.19	0.0972376	0.0983575	0.688043	0.162088	0.148292	0.717787	0.0952935	0.476317	0.86859	0.288452	0.014866	0.398354	-0.0667994	0.629685	1	0.126371	0.308423	1	-0.193171	0.177395	1
ENSG00000145868		brown	-0.289211	0.0871178	FBXO38	1066.67	0.252495	0.21249		0.274084	0.164176	0.743498	0.197071	0.346022		0.416029	0.0392467		-0.0770282	0.71721	1	0.141973	0.4917	1	-0.219005	0.309275	1
ENSG00000177042		brown	-0.287661	0.0889013	TMEM80	749.32	0.602802	0.179653		0.293578	0.157873		0.367592	0.0867011		0.433813	0.0399771		0.0740388	0.732901	1	0.140268	0.513334	1	-0.0662299	0.761736	1
ENSG00000275835		brown	-0.287287	0.089336	TUBGCP5	394.325	0.188043	0.0616992		-0.209557	0.337679		0.0898204	0.675829		0.373431	0.0877605		0.299471	0.162767	1	0.583159	0.00778889	1	-0.283694	0.183941	1
ENSG00000072694	Yes	brown	-0.283861	0.0933924	FCGR2B	1604.62	0.841552	0.265398	0.866332	0.214228	0.317573	0.852056	0.430097	0.0466798	0.471859	0.24127	0.264587	0.852316	0.215937	0.320663	1	0.0270493	0.901416	1	0.188892	0.385735	1
ENSG00000106100		brown	-0.282767	0.0947173	NOD1	996.385	0.472851	0.0905756		0.251322	0.220816	0.786253	0.256095	0.230299		-0.210729	0.313419		0.00479023	0.982323	1	-0.462157	0.0298756	1	0.466956	0.0322301	1
ENSG00000118680		brown	0.281683	0.096043	MYL12B	5776.96	-0.118933	0.0654001	0.614909	0.26855	0.0339695	0.490666	-0.0907242	0.542867	0.900058	0.0236162	0.859429	0.988051	-0.359302	0.0197413	1	-0.244948	0.0788199	1	-0.114355	0.47205	1
ENSG00000187954		brown	-0.279504	0.0987534	CYHR1	1736.57	0.320353	0.0977123	0.687085	0.397978	0.0138432	0.349148	0.261865	0.151446	0.639065	0.179301	0.287142	0.862843	-0.136123	0.468112	1	-0.218699	0.210533	1	0.0825771	0.667533	1
ENSG00000234337		brown	0.277656	0.101096	RP11-297L17.6	1431.87	-0.0244822	0.0586882	0.588323	-0.293051	0.0435008	0.525829	-0.025841	0.877315	0.974432	0.123726	0.415534	0.917971	0.267233	0.121617	1	0.416813	0.00846492	1	-0.149581	0.399284	1
ENSG00000169592		brown	-0.274947	0.104608	INO80E	1726.86	0.293646	0.109921	0.696267	-0.295248	0.114177	0.680751	0.17278	0.3936	0.843664	0.0879999	0.647638	0.969526	0.468114	0.0235922	1	0.383309	0.0528596	1	0.0848068	0.686746	1
ENSG00000213250		brown	0.274568	0.105106	RBMS2P1	33.7062	-9.96563	0.0376761		0.000287527	0.998062		-0.0751849	0.459567		-0.00816375	0.942249		-0.0755153	0.433468	1	-0.00845576	0.93692	1	-0.0670625	0.464674	1
ENSG00000105640		brown	-0.272413	0.107975	RPL18A	5203.65	0.313382	0.0757921	0.645143	0.149685	0.203922	0.778088	0.272001	0.0517879	0.490997	-0.06815	0.583563	0.956349	0.122329	0.397975	1	-0.217848	0.0941001	1	0.340179	0.0228973	1
ENSG00000060237		brown	0.272222	0.108233	WNK1	7382.51	-0.217772	0.0744193	0.637819	-0.264723	0.0113942	0.326293	-0.201695	0.108361	0.593019	-0.127313	0.249987	0.84049	0.0630283	0.628295	1	0.137415	0.236517	1	-0.0743875	0.580807	1
ENSG00000112658		brown	0.271907	0.108658	SRF	2381.25	-0.0217327	0.0146952	0.347349	0.0849648	0.591686	0.919976	-0.0330219	0.85416	0.971472	-0.446777	0.00685724	0.290589	-0.117994	0.523094	1	-0.531802	0.00193184	1	0.413813	0.0289891	1
ENSG00000047056		brown	-0.271828	0.108765	WDR37	1487.11	0.309292	0.0315372	0.472111	-0.253107	0.138576	0.703227	0.187928	0.323355	0.802534	-0.319151	0.0719856	0.611263	0.441107	0.023837	1	-0.0660568	0.718831	1	0.50717	0.0110313	1
ENSG00000128731		brown	-0.266382	0.116319	HERC2	3387.57	0.323866	0.14573	0.750906	0.0949449	0.52804	0.909108	0.266785	0.121762	0.607485	0.329377	0.036294	0.500352	0.171861	0.333182	1	0.234455	0.151911	1	-0.0625944	0.731492	1
ENSG00000259086		brown	0.264098	0.119602	RP11-134E15.2	31.7673	-0.622911	0.151455		-0.294676	0.0465884		-0.151104	0.240318		-0.242149	0.0873898		0.143652	0.241861	1	0.0525567	0.697284	1	0.0910986	0.437644	1
ENSG00000129534		brown	-0.262415	0.122066	MIS18BP1	3191.16	0.281674	0.162385	0.776425	-0.0287482	0.824659	0.972583	0.229645	0.131398	0.62079	-0.125947	0.356207	0.899442	0.258419	0.100435	1	-0.0972066	0.495468	1	0.355628	0.0283613	1
ENSG00000177971		brown	-0.259831	0.125921	IMP3	1196.24	0.625232	0.150751		0.330931	0.0833374	0.624438	0.426183	0.0380097		0.32229	0.100884		0.0952814	0.649082	1	-0.00863977	0.965814	1	0.103923	0.624995	1
ENSG00000135999		brown	-0.255974	0.131843	EPC2	1339.64	0.461912	0.0360006		-0.253951	0.144294	0.71384	0.301477	0.117797		-0.0985595	0.584609		0.555519	0.00492807	1	0.15541	0.404191	1	0.400114	0.0473676	1
ENSG00000253352		brown	-0.254296	0.134483	TUG1	5767.78	-0.0371696	0.164713	0.777505	-0.190729	0.105939	0.666481	-0.0430348	0.758577	0.959766	-0.245282	0.0487556	0.552273	0.147705	0.308069	1	-0.0545569	0.675416	1	0.202263	0.176644	1
ENSG00000119596		brown	-0.253637	0.13553	YLPM1	2872.3	0.0799793	0.0274636	0.442788	0.176779	0.164113	0.743498	0.0650201	0.663649	0.935838	-0.243053	0.0692994	0.599836	-0.111762	0.46957	1	-0.41986	0.00267584	1	0.308099	0.0533538	1
ENSG00000196547		brown	0.252993	0.136559	MAN2A2	6153.08	-0.366493	0.0146591	0.347349	-0.406104	0.00209264	0.156618	-0.319822	0.038456	0.442906	-0.156714	0.258712	0.84769	0.0862832	0.588839	1	0.249407	0.085225	1	-0.163125	0.321462	1
ENSG00000139579		brown	-0.249297	0.142578	NABP2	429.852	1.07461	0.0839891		0.397167	0.066397		0.399837	0.0496863		0.518558	0.0151084		0.00267611	0.98937	1	0.121434	0.564545	1	-0.118761	0.54769	1
ENSG00000197183		brown	0.246166	0.147827	NOL4L	1086.13	-0.265547	0.105352		0.000145376	0.999387	0.999883	-0.193812	0.34225		-0.43437	0.0256238		-0.193991	0.351437	1	-0.434593	0.02971	1	0.240605	0.255462	1
ENSG00000131844		brown	-0.245586	0.148816	MCCC2	1673.65	0.386254	0.00549065	0.236173	-0.288183	0.0516746	0.543791	0.295297	0.0826195	0.554542	0.129896	0.401764	0.91466	0.583544	0.000875985	1	0.418116	0.00952383	1	0.16543	0.358553	1
ENSG00000090382		brown	0.243382	0.152612	LYZ	174709	-0.511925	0.0400786	0.508968	-0.314935	0.0906913	0.638207	-0.328245	0.104204	0.591912	0.150817	0.431845	0.917971	-0.0133328	0.948472	1	0.465826	0.018248	1	-0.479166	0.0224236	1
ENSG00000229447		brown	-0.242756	0.153703	RP11-490K7.4	27.584	22.1094	0.0211317		0.0568454	0.476103		0.0679881	0.316263		0.108874	0.14987		0.0111488	0.861711	1	0.0520573	0.465321	1	-0.0409103	0.499799	1
ENSG00000216866		brown	-0.241052	0.156703	RPS2P55	563.515	0.437992	0.209449		0.223221	0.304615		0.247349	0.251579		0.463803	0.0335835		0.0241369	0.911044	1	0.240648	0.272515	1	-0.216516	0.315063	1
ENSG00000175166		brown	0.23918	0.160044	PSMD2	4886.73	-0.197923	0.105014	0.69074	-0.225223	0.0212215	0.403548	-0.18561	0.115776	0.601685	-0.155289	0.133676	0.721595	0.0396123	0.746197	1	0.0699356	0.520024	1	-0.0303235	0.810904	1
ENSG00000036054		brown	-0.237655	0.162806	TBC1D23	794.199	0.813587	0.100879		0.021309	0.920849		0.375055	0.0828174		-0.144711	0.503569		0.353851	0.103632	1	-0.166071	0.447048	1	0.519934	0.0169424	1
ENSG00000264608		brown	0.234389	0.168835	RP11-192H23.8	46.805	-10.1922	0.0417764		0.0370963	0.74191		-0.0459633	0.634041		0.0186607	0.861718		-0.083106	0.36363	1	-0.0184452	0.85576	1	-0.0646636	0.457116	1
ENSG00000232004		brown	0.233856	0.169833	CAP1P2	31.4048	0.395322	0.183297		0.484542	0.0254311		0.16983	0.405777		0.0049784	0.981422		-0.31481	0.118609	1	-0.479728	0.0232881	1	0.164923	0.405411	1
ENSG00000226396		brown	0.232132	0.173094	RP5-1056L3.3	100.187	-2.00337	0.0406814		-0.320684	0.0880719		-0.256388	0.127015		0.0631597	0.7285		0.0643185	0.691996	1	0.384026	0.0290284	1	-0.319719	0.0416751	1
ENSG00000135316		brown	-0.226506	0.184042	SYNCRIP	5294.95	0.35325	0.214739	0.832565	0.0580425	0.643763	0.933364	0.302107	0.0410651	0.455996	0.100309	0.447895	0.919085	0.244087	0.11041	1	0.0422685	0.759678	1	0.20182	0.200828	1
ENSG00000196455		brown	-0.225987	0.185074	PIK3R4	501.682	0.927012	0.0528983		-0.133226	0.54293		0.349388	0.102603		-0.187154	0.392223		0.48277	0.0237205	1	-0.0539521	0.805215	1	0.536736	0.0113917	1
ENSG00000153898		brown	0.22328	0.190534	MCOLN2	1064.42	-0.937145	0.248295		-0.178442	0.404633	0.890225	-0.436262	0.0435973		-0.195568	0.36548		-0.257917	0.235615	1	-0.0171309	0.93744	1	-0.240793	0.269019	1
ENSG00000132405		brown	-0.217927	0.201663	TBC1D14	3819.6	-0.0854699	0.131212	0.743174	-0.261935	0.0186642	0.388594	-0.0824355	0.535232	0.895277	-0.0735591	0.531736	0.949333	0.179509	0.192387	1	0.188385	0.126483	1	-0.0088763	0.950283	1
ENSG00000254395		brown	-0.215069	0.207787	IGHV4-55	5.93549	3.51691	0.154845		0.0251523	0.817126		0.207688	0.0257783		0.0370488	0.720105		0.182632	0.0384116	1	0.0119028	0.903212	1	0.170736	0.0416337	1
ENSG00000115561		brown	0.213517	0.211165	CHMP3	1479.07	-0.00271749	0.128467	0.739171	0.0370307	0.833683	0.975781	-0.0216097	0.91163	0.984767	-0.373101	0.0410928	0.523903	-0.0586426	0.76872	1	-0.410193	0.0296043	1	0.351555	0.0841591	1
ENSG00000134717		brown	-0.212821	0.212691	BTF3L4	1235.79	0.602168	0.170725		0.311861	0.0931151	0.64288	0.416524	0.0389303		0.199121	0.298365		0.104693	0.611317	1	-0.112757	0.56696	1	0.217453	0.29954	1
ENSG00000157601		brown	-0.211837	0.214864	MX1	3391.68	0.720634	0.136468	0.748146	0.0310939	0.878012	0.9813	0.402464	0.057866	0.511444	-0.0445119	0.82951	0.98438	0.371463	0.0843495	1	-0.0756251	0.719816	1	0.447096	0.0397093	1
ENSG00000173692		brown	0.209465	0.220164	PSMD1	2175.8	-0.174309	0.131469	0.743174	0.235821	0.100946	0.659265	-0.129124	0.437079	0.858582	-0.0330059	0.826618	0.983843	-0.364983	0.0331441	1	-0.268848	0.0867102	1	-0.0961357	0.585435	1
ENSG00000147251		brown	0.205818	0.228486	DOCK11	5027.86	-0.340361	0.0706925	0.630745	-0.169204	0.102614	0.662271	-0.30786	0.0134822	0.306259	-0.0543947	0.619918	0.967842	-0.138667	0.282929	1	0.114814	0.318329	1	-0.253483	0.0578528	1
ENSG00000243199		brown	0.204432	0.231702	RP11-408P14.1	2680.73	-0.362608	0.0379481	0.508968	-0.144865	0.361022	0.86666	-0.261752	0.14551	0.636317	0.239734	0.147119	0.744136	-0.116916	0.527314	1	0.38464	0.0250375	1	-0.501562	0.00817073	1
ENSG00000159140		brown	-0.202842	0.235431	SON	16979.7	0.0760544	0.0896843	0.669057	0.075534	0.35136	0.86524	0.0703114	0.477362	0.87014	-0.139766	0.104524	0.686215	-0.0052213	0.959466	1	-0.215306	0.0174093	1	0.210085	0.0486924	1
ENSG00000120438		brown	0.201318	0.239043	TCP1	3269.55	-0.239107	0.159234	0.772168	0.0280415	0.797241	0.967794	-0.207151	0.112802	0.601685	0.110078	0.339941	0.889771	-0.23521	0.0821533	1	0.0820416	0.497416	1	-0.317254	0.0233687	1
ENSG00000102030		brown	0.197317	0.248703	NAA10	803.271	-0.37223	0.0350084		0.300919	0.147479		-0.18069	0.399651		-0.285393	0.17645		-0.481724	0.0263673	1	-0.586443	0.00626365	1	0.104721	0.631636	1
ENSG00000108788		brown	0.196328	0.251131	MLX	2164.66	-0.592439	0.0307839	0.466001	0.167965	0.32079	0.854132	-0.40642	0.0314887	0.42488	-0.125554	0.474963	0.932809	-0.57448	0.00304627	1	-0.293552	0.106466	1	-0.280932	0.15654	1
ENSG00000135535	Yes	brown	0.189744	0.267692	CD164	9600.64	-0.0516022	0.182466	0.802598	-0.144439	0.0633117	0.585238	-0.0497761	0.600888	0.914563	0.0270826	0.743131	0.973822	0.0946643	0.338076	1	0.171525	0.0485262	1	-0.076861	0.453423	1
ENSG00000112972		brown	0.188856	0.269981	HMGCS1	1265.02	-0.148556	0.0231468		0.251737	0.152659	0.721201	-0.104031	0.592699		-0.323333	0.0762222		-0.355817	0.0740467	1	-0.57515	0.00224967	1	0.219335	0.280755	1
ENSG00000151116		brown	0.185645	0.278356	UEVLD	557.702	-0.362559	0.128718		-0.292786	0.181761		-0.130399	0.538994		0.207571	0.341766		0.162434	0.441623	1	0.500515	0.021504	1	-0.33809	0.106149	1
ENSG00000183199		brown	-0.184939	0.28022	HSP90AB3P	149.615	0.243809	0.0692471		0.411716	0.0604103		0.114254	0.589893		-0.142052	0.515077		-0.297544	0.158034	1	-0.553945	0.0108749	1	0.256408	0.219432	1
ENSG00000176101		brown	0.180593	0.291876	SSNA1	1470.41	-0.203337	0.126683	0.734091	0.306459	0.0695457	0.604142	-0.117864	0.532226	0.894817	0.110705	0.528012	0.949333	-0.424388	0.0283889	1	-0.195774	0.280827	1	-0.228617	0.24832	1
ENSG00000127481		brown	-0.180369	0.292484	UBR4	6273.11	-0.149154	0.136465	0.748146	-0.245808	0.0683616	0.604137	-0.127409	0.418195	0.849402	0.0724563	0.609025	0.964295	0.118404	0.466302	1	0.318288	0.0313457	1	-0.199885	0.232559	1
ENSG00000157933		brown	0.176417	0.303365	SKI	1930.35	-0.344528	0.138728	0.750906	-0.271517	0.136887	0.70272	-0.268133	0.178743	0.670472	-0.42743	0.0233495	0.46674	0.0033821	0.986765	1	-0.155941	0.421874	1	0.159325	0.442975	1
ENSG00000241494		brown	0.174534	0.308635	RP11-796G6.1	140.153	-1.22941	0.0894222		-0.291468	0.172418		-0.285019	0.152213		0.113511	0.58882		0.00643121	0.973765	1	0.405132	0.0498695	1	-0.398714	0.0375876	1
ENSG00000169957		brown	0.174518	0.308681	ZNF768	1065.83	-0.546827	0.0995515		-0.225783	0.270515	0.830184	-0.279088	0.190765		0.197334	0.344383		-0.0533403	0.805025	1	0.423206	0.046454	1	-0.476556	0.0287831	1
ENSG00000064490		brown	-0.172027	0.315746	RFXANK	1166.47	0.533388	0.0935523		-0.0256775	0.884008	0.982118	0.377215	0.0523276		0.269928	0.138586		0.402961	0.043018	1	0.295647	0.116164	1	0.107316	0.597469	1
ENSG00000062725		brown	0.16213	0.344801	APPBP2	964.015	-0.527222	0.108702		-0.344633	0.0841693	0.624438	-0.359865	0.0874723		-0.460247	0.0241158		-0.0152434	0.943194	1	-0.115642	0.579205	1	0.1004	0.642697	1
ENSG00000105851		brown	0.160037	0.35115	PIK3CG	2287.68	0.171388	0.169943	0.78682	-0.0173047	0.913772	0.985083	0.112631	0.533491	0.894817	-0.288729	0.0830995	0.642263	0.129959	0.484721	1	-0.271457	0.116363	1	0.40142	0.0352707	1
ENSG00000162032		brown	0.153615	0.37106	SPSB3	2644.75	-0.146634	0.245956	0.852311	-0.110121	0.464534	0.900242	-0.130978	0.447718	0.858772	-0.323208	0.0401054	0.514246	-0.0208586	0.906564	1	-0.213109	0.193182	1	0.192252	0.292293	1
ENSG00000228501		brown	0.152179	0.375602	RPL15P18	8.26536	0.459754	0.0234863		0.330095	0.010922		0.0723288	0.517099		0.0114766	0.925963		-0.2579	0.0151796	1	-0.318788	0.00665293	1	0.0608903	0.546979	1
ENSG00000176871		brown	0.148907	0.386076	WSB2	1165.75	-0.459634	0.104158		-0.0212174	0.914822	0.985083	-0.294642	0.160448		-0.4379	0.0310273		-0.273486	0.199908	1	-0.416767	0.0446889	1	0.143284	0.507048	1
ENSG00000110448	Yes	brown	-0.148657	0.38688	CD5	758.248	0.627042	0.194028		0.167147	0.445027		0.24571	0.251614		-0.184232	0.399684		0.0785989	0.713236	1	-0.351494	0.108382	1	0.430105	0.0430863	1
ENSG00000075239		brown	0.128756	0.454222	ACAT1	721.243	0.244844	0.148653		-0.365196	0.0730667		0.0918819	0.665841		-0.165523	0.425507		0.457186	0.0340222	1	0.199714	0.345491	1	0.257477	0.236903	1
ENSG00000272734		brown	0.107999	0.530682	ADIRF-AS1	126.16	-9.44232	0.00902461		-0.0442214	0.741589		-0.102058	0.378225		0.0329803	0.796604		-0.0578712	0.599353	1	0.0772416	0.525585	1	-0.135118	0.198412	1
ENSG00000119688		brown	-0.106827	0.53518	ABCD4	1526.04	0.542073	0.127644	0.735876	0.26046	0.128162	0.693345	0.409285	0.0317354	0.426474	0.320192	0.0715107	0.610707	0.148855	0.44626	1	0.0597403	0.745042	1	0.0891162	0.655496	1
ENSG00000136149		brown	-0.103276	0.548909	RPL13AP25	262.209	0.045338	0.139584		-0.00811635	0.969642		-0.0211325	0.922098		-0.433542	0.0442497		-0.0130116	0.952308	1	-0.425546	0.050791	1	0.412544	0.0585764	1
ENSG00000172775		brown	-0.102869	0.550494	FAM192A	2570.2	-0.0784093	0.108574	0.69164	-0.324567	0.0469439	0.531895	-0.0689702	0.707738	0.946258	0.0819317	0.629903	0.968594	0.255626	0.176317	1	0.406545	0.0210966	1	-0.150921	0.435655	1
ENSG00000179304		brown	0.0959964	0.577568	FAM156B	5.58019	-0.818063	0.199674		0.31996	0.10465		-0.0246831	0.888965		0.101558	0.595049		-0.344797	0.0451871	1	-0.218488	0.240531	1	-0.126315	0.448281	1
ENSG00000116221		brown	0.0957569	0.578523	MRPL37	1242.97	-0.412616	0.0541995		0.328741	0.0753555	0.613808	-0.224129	0.265167		0.106164	0.577688		-0.552979	0.00712024	1	-0.222606	0.256537	1	-0.330378	0.114165	1
ENSG00000217835		brown	-0.0922474	0.592585	RP6-159A1.2	16.0372	-0.773665	0.0198922		0.368169	0.00581321		0.0735806	0.522837		0.0972953	0.44461		-0.294744	0.00715437	1	-0.271012	0.0252343	1	-0.0237337	0.820235	1
ENSG00000141376		brown	0.090615	0.599176	BCAS3	562.202	-0.54592	0.0494598		-0.585527	0.0052878		-0.351797	0.102251		-0.307924	0.148044		0.23378	0.28217	1	0.277668	0.198527	1	-0.0438892	0.84083	1
ENSG00000133812		brown	0.0899902	0.601707	SBF2	1152.87	-0.854474	0.101564		-0.126458	0.541941	0.909699	-0.408078	0.0569612		0.111521	0.596719		-0.281723	0.19383	1	0.238032	0.26656	1	-0.519767	0.0173058	1
ENSG00000136286		brown	0.0896085	0.603256	MYO1G	8786.38	-0.0963582	0.0550741	0.579444	-0.146048	0.106062	0.666481	-0.0888877	0.417647	0.849147	0.118366	0.216761	0.814169	0.05716	0.615443	1	0.264422	0.00863754	1	-0.207263	0.0788002	1
ENSG00000255967		brown	-0.0862793	0.616835	RP11-438L7.3	21.4888	0.74812	0.10292		0.329923	0.0204101		0.0954649	0.438557		0.04312	0.751011		-0.234574	0.0458634	1	-0.286948	0.0267447	1	0.0523757	0.640494	1
ENSG00000135837		brown	0.0714141	0.678954	CEP350	3260.41	-0.245225	0.0573551	0.584086	-0.382371	0.00633028	0.250046	-0.215625	0.184522	0.674994	-0.147555	0.315148	0.876449	0.166757	0.320031	1	0.234834	0.125251	1	-0.0680778	0.693261	1
ENSG00000142875		brown	0.0700644	0.684706	PRKACB	1909.7	-0.176938	0.00695887	0.263738	0.188605	0.220596	0.786253	-0.102935	0.557958	0.908054	0.45827	0.00436996	0.244445	-0.291584	0.106891	1	0.269694	0.106497	1	-0.561283	0.00249383	1
ENSG00000091039		brown	0.0642875	0.709522	OSBPL8	5704.1	0.0475793	0.132781	0.744145	0.239193	0.0367497	0.502482	0.0519721	0.703145	0.945201	0.204209	0.0912468	0.658596	-0.187233	0.184766	1	-0.0349847	0.782326	1	-0.152249	0.296725	1
ENSG00000023041		brown	-0.0413773	0.810637	ZDHHC6	1305.7	-0.148222	0.0342652		0.0970511	0.588455	0.91801	-0.0606251	0.75834		0.455181	0.0141111		-0.157715	0.434143	1	0.358182	0.0610831	1	-0.515904	0.0120912	1
ENSG00000148484		brown	0.036729	0.831586	RSU1	3393.53	0.244904	0.205738	0.823501	-0.192568	0.200848	0.772828	0.180547	0.295167	0.779275	-0.0122828	0.937802	0.994027	0.373158	0.0356998	1	0.180301	0.270806	1	0.19286	0.290594	1
ENSG00000176788		brown	0.0252425	0.883816	BASP1	4615.44	0.340812	0.0859112	0.667624	0.287279	0.0439627	0.525829	0.281612	0.087823	0.566724	0.00528995	0.971774	0.996263	-0.00565857	0.973471	1	-0.282012	0.0702183	1	0.276356	0.114447	1
ENSG00000185361		brown	-0.00020038	0.999075	TNFAIP8L1	748.496	-0.040205	0.122562		0.426269	0.0306149		0.0232893	0.911373		0.140709	0.485977		-0.403062	0.0581552	1	-0.285608	0.166846	1	-0.117457	0.585687	1
ENSG00000075426		green	0.879215	1.72686e-12	FOSL2	11770.1	-0.820944	0.00106735	0.097271	-0.651058	0.000269452	0.0528497	-0.602037	0.00218848	0.153525	-0.330947	0.0734136	0.615083	0.049007	0.807527	1	0.320155	0.0931636	1	-0.271152	0.186256	1
ENSG00000128016		green	0.793009	8.10863e-09	ZFP36	26850.8	-0.401797	0.00687459	0.263738	-0.399108	0.00603623	0.244399	-0.349002	0.0373081	0.442092	-0.456392	0.00271833	0.198325	0.0501062	0.771838	1	-0.0572919	0.717811	1	0.107399	0.545554	1
ENSG00000161835		green	0.790246	9.92743e-09	GRASP	5446.61	-0.752778	0.0426327	0.513307	-0.40011	0.0427288	0.525829	-0.49564	0.0179244	0.339344	-0.471164	0.0197951	0.449351	-0.0955657	0.65352	1	-0.0710714	0.731154	1	-0.0244956	0.909537	1
ENSG00000059728		green	0.779397	2.13692e-08	MXD1	2706.91	-0.882093	0.000775943	0.083415	-0.601169	0.001148	0.118503	-0.639157	0.00148329	0.130054	-0.602277	0.00158618	0.155202	-0.0380134	0.853238	1	-0.00111266	0.995476	1	-0.0369023	0.859939	1
ENSG00000103257	Yes	green	0.773524	3.1795e-08	SLC7A5	1457.27	-1.35305	9.3862e-05	0.032426	-0.90635	3.0246e-05	0.0215049	-0.737625	0.000631068	0.103926	-0.749603	0.000590345	0.0943498	0.168755	0.435036	1	0.156788	0.474633	1	0.0119661	0.955762	1
ENSG00000179094		green	0.769038	4.27361e-08	PER1	11144.2	-0.829234	0.000733917	0.083253	-0.5755	0.00166531	0.145087	-0.612393	0.00217322	0.153525	-0.638916	0.00072108	0.104091	-0.0369146	0.856556	1	-0.0634312	0.744437	1	0.0265161	0.898547	1
ENSG00000140564	Yes	green	0.764911	5.57751e-08	FURIN	6076.17	-0.538761	0.00414746	0.207284	-0.488005	0.00116669	0.118503	-0.449797	0.00902412	0.268805	-0.361447	0.0214632	0.459558	0.0382026	0.829557	1	0.126568	0.43885	1	-0.088367	0.627855	1
ENSG00000160888		green	0.757636	8.80524e-08	IER2	9745.69	-0.476755	0.000495024	0.071715	-0.322678	0.00871532	0.288008	-0.426519	0.003336	0.189136	-0.489972	0.000157059	0.044524	-0.103853	0.489613	1	-0.167306	0.217244	1	0.0634528	0.682577	1
ENSG00000011422	Yes	green	0.751355	1.28976e-07	PLAUR	3449.17	-0.629399	0.10155	0.690409	-0.477597	0.0211245	0.403548	-0.393213	0.0665017	0.522828	-0.336541	0.110023	0.689368	0.0843917	0.697036	1	0.141085	0.509924	1	-0.0566948	0.795136	1
ENSG00000033327		green	0.72305	6.32854e-07	GAB2	2915.65	-0.815616	0.000115402	0.034551	-0.594659	0.00012408	0.0368529	-0.658132	0.000193157	0.082373	-0.415247	0.0102608	0.343489	-0.0634979	0.726794	1	0.179429	0.28582	1	-0.24293	0.192696	1
ENSG00000135821		green	0.721038	7.03407e-07	GLUL	7512.96	-0.439188	0.0417498	0.513307	-0.32185	0.0178795	0.386687	-0.375375	0.0178192	0.339344	-0.230096	0.106949	0.689261	-0.0535367	0.743465	1	0.0917605	0.537842	1	-0.145299	0.38853	1
ENSG00000100644		green	0.720766	7.13505e-07	HIF1A	6303.71	-0.630368	4.91854e-05	0.022089	-0.535405	0.000149373	0.0369406	-0.542798	0.000907745	0.114606	-0.554765	0.000179091	0.044524	-0.00740214	0.965024	1	-0.0193635	0.900161	1	0.011961	0.945107	1
ENSG00000196664	Yes	green	-0.715614	9.31204e-07	TLR7	712.585	1.82923	0.000556855		0.776802	0.000395615		0.79699	0.000178871		0.678477	0.00189935		0.0202112	0.92393	1	-0.0983481	0.651879	1	0.118563	0.572205	1
ENSG00000174123	Yes	green	-0.714024	1.0098e-06	TLR10	1551.37	1.52254	4.17819e-05	0.020973	0.692867	0.000814377	0.098557	0.91594	1.90479e-05	0.0426198	0.854573	4.88995e-05	0.044524	0.22314	0.303163	1	0.161743	0.449686	1	0.0613992	0.778536	1
ENSG00000175857		green	-0.709406	1.2739e-06	GAPT	2359.39	1.16298	0.00198648	0.148688	0.575772	0.00345463	0.197318	0.750623	0.000330031	0.0982811	0.385295	0.0561182	0.566457	0.174905	0.410703	1	-0.190511	0.355987	1	0.365423	0.0897254	1
ENSG00000140332		green	0.705389	1.55363e-06	TLE3	4421.41	-0.39181	0.000638895	0.079353	-0.4697	0.000105371	0.0356708	-0.355654	0.0130971	0.300562	-0.336813	0.0083391	0.31625	0.114049	0.441917	1	0.132893	0.319919	1	-0.0188447	0.902056	1
ENSG00000112308		green	-0.699506	2.06577e-06	C6orf62	6194.14	0.364783	0.000258891	0.052849	0.329005	0.00074805	0.0967025	0.342425	0.00365562	0.193416	0.389379	0.000165348	0.044524	0.0134227	0.912497	1	0.0603778	0.577853	1	-0.0469551	0.710484	1
ENSG00000134061	Yes	green	-0.686894	3.72158e-06	CD180	1439.19	1.04224	0.00032215	0.056768	0.755427	0.000106611	0.0356708	0.712531	0.000608803	0.103926	0.64616	0.00123089	0.137706	-0.0428862	0.839366	1	-0.10928	0.593589	1	0.0663958	0.756901	1
ENSG00000144655		green	0.683736	4.29323e-06	CSRNP1	4540.58	-0.550301	0.124425	0.728714	-0.354684	0.04854	0.533003	-0.39987	0.042758	0.464007	-0.273296	0.141523	0.732763	-0.0452069	0.822878	1	0.0813982	0.671091	1	-0.126607	0.538597	1
ENSG00000229644		green	0.682777	4.48209e-06	NAMPTP1	403.6	-0.665279	0.0955651		-0.497574	0.0188034		-0.249609	0.203707		-0.129684	0.532538		0.24807	0.197658	1	0.368046	0.071223	1	-0.119981	0.524412	1
ENSG00000116604		green	0.677583	5.64322e-06	MEF2D	4803.81	-0.472728	0.000256719	0.052849	-0.597987	2.01824e-05	0.0191329	-0.412177	0.011304	0.288352	-0.331518	0.0242416	0.46674	0.185819	0.268459	1	0.26649	0.0823666	1	-0.080671	0.640645	1
ENSG00000170385	Yes	green	0.671049	7.4921e-06	SLC30A1	2388.4	-0.830269	0.0299764	0.459468	-0.440854	0.0202879	0.400687	-0.545954	0.00763367	0.251119	-0.20982	0.282838	0.860434	-0.105145	0.614425	1	0.231073	0.249406	1	-0.336224	0.112779	1
ENSG00000155307		green	0.669567	7.98149e-06	SAMSN1	806.562	-0.51125	0.00479736		-0.768499	0.000269448		-0.352248	0.102287		-0.318728	0.1358		0.416354	0.055593	1	0.449885	0.0377686	1	-0.033531	0.878036	1
ENSG00000100664		green	0.663434	1.03339e-05	EIF5	6466.65	-0.211164	0.0411833	0.512339	-0.329436	0.0107276	0.317806	-0.195131	0.198017	0.689937	-0.305545	0.0245016	0.46674	0.134314	0.391297	1	0.0238909	0.866337	1	0.110423	0.494337	1
ENSG00000205269		green	0.662509	1.07389e-05	TMEM170B	3677.35	-0.740855	0.0055657	0.236173	-0.475664	0.00514533	0.232769	-0.545495	0.00401531	0.195101	-0.112554	0.523695	0.949333	-0.0698629	0.7195	1	0.363155	0.0467557	1	-0.433024	0.0294609	1
ENSG00000099860		green	0.659986	1.1918e-05	GADD45B	3137.63	-0.634089	0.000942202	0.094032	-0.565414	0.000322314	0.0591394	-0.518734	0.00367383	0.193416	-0.43018	0.00871778	0.320485	0.046674	0.799477	1	0.135246	0.427181	1	-0.0885732	0.638353	1
ENSG00000087074		green	0.659901	1.19599e-05	PPP1R15A	8827.76	-0.254551	0.0975709	0.687085	-0.34461	0.0320148	0.485601	-0.220661	0.224521	0.708555	-0.349907	0.0366738	0.500352	0.123962	0.506895	1	-0.005301	0.975659	1	0.129264	0.499498	1
ENSG00000168394		green	-0.658855	1.24842e-05	TAP1	5217.78	0.566365	0.000186939	0.046641	0.460752	0.00011716	0.0368529	0.503591	0.000381268	0.0982811	0.247948	0.0493652	0.552273	0.0428499	0.770126	1	-0.212815	0.106884	1	0.255667	0.091401	1
ENSG00000160201		green	0.65546	1.4333e-05	U2AF1	849.173	-1.00812	0.222127		-0.39238	0.0417076		-0.262457	0.129404		-0.237193	0.204151		0.129982	0.438104	1	0.155262	0.391062	1	-0.0252812	0.876238	1
ENSG00000051108		green	0.645975	2.08949e-05	HERPUD1	8726.47	0.0440225	0.000173445	0.04582	-0.53826	6.07542e-05	0.0312596	0.00817944	0.958379	0.990785	-0.32299	0.0220111	0.464621	0.546488	0.000735825	1	0.215283	0.14366	1	0.331207	0.0470624	1
ENSG00000140044		green	0.643814	2.27277e-05	JDP2	1136.22	-0.297309	0.023605		-0.512133	0.00781275	0.27949	-0.253028	0.220078		-0.499982	0.0114586		0.259153	0.217729	1	0.012147	0.952245	1	0.24701	0.246983	1
ENSG00000120705		green	0.642265	2.41304e-05	ETF1	3155.92	-0.554596	0.0425506	0.513307	-0.300016	0.0453104	0.52812	-0.442045	0.0101215	0.282888	-0.100181	0.522718	0.949333	-0.142058	0.422465	1	0.199854	0.220356	1	-0.341916	0.0601844	1
ENSG00000170525		green	0.641739	2.46239e-05	PFKFB3	2438.91	-0.518679	0.219527	0.836286	-0.431364	0.0437361	0.525829	-0.307377	0.155063	0.641878	-0.29097	0.177848	0.77564	0.124013	0.568562	1	0.140429	0.519776	1	-0.0164169	0.939952	1
ENSG00000059804	Yes	green	0.639581	2.67473e-05	SLC2A3	6273.11	-0.709433	0.00754526	0.266817	-0.62266	0.00126458	0.121914	-0.499543	0.0156752	0.318159	-0.425404	0.0319335	0.484745	0.123127	0.558765	1	0.197289	0.331873	1	-0.0741639	0.728496	1
ENSG00000124762		green	0.636029	3.06059e-05	CDKN1A	4088.63	-0.398181	0.0399757	0.508968	-0.599209	0.00395573	0.210337	-0.288143	0.179367	0.671127	-0.342879	0.104581	0.686215	0.311137	0.151571	1	0.256388	0.232299	1	0.0547505	0.802095	1
ENSG00000128272		green	0.629387	3.92027e-05	ATF4	12937.1	-0.400291	0.00283836	0.177918	-0.241699	0.00831774	0.283301	-0.373592	0.000769475	0.114606	-0.215334	0.0266189	0.46674	-0.131902	0.252361	1	0.0263652	0.796109	1	-0.158268	0.185042	1
ENSG00000141506		green	0.628341	4.07393e-05	PIK3R5	4789.44	-0.251297	0.0632068	0.602573	-0.291792	0.0153429	0.365148	-0.229	0.108184	0.593019	-0.248584	0.0501445	0.553377	0.0627938	0.67031	1	0.0432094	0.744923	1	0.0195843	0.897688	1
ENSG00000081320		green	0.628276	4.08374e-05	STK17B	19027.2	-0.265266	0.087773	0.668455	-0.299523	0.0162067	0.371849	-0.237933	0.105378	0.592723	-0.198995	0.1294	0.712751	0.0615909	0.685217	1	0.100533	0.463752	1	-0.0389428	0.803859	1
ENSG00000112715		green	0.627082	4.26623e-05	VEGFA	3019.05	-0.503071	0.0560842	0.581696	-0.59517	0.00597266	0.244399	-0.314104	0.146033	0.636317	-0.337685	0.120873	0.706098	0.281144	0.194536	1	0.257557	0.239887	1	0.0235867	0.913246	1
ENSG00000169508	Yes	green	0.625644	4.49573e-05	GPR183	8988.6	-0.134152	0.00931639	0.296737	-0.576887	0.00185643	0.148723	-0.151823	0.451056	0.858772	-0.435105	0.0228113	0.46674	0.425138	0.0388334	1	0.1418	0.470839	1	0.283343	0.176016	1
ENSG00000130775		green	0.625117	4.58279e-05	THEMIS2	9995.22	-0.319031	0.171002	0.787253	-0.33483	0.0325635	0.48871	-0.261557	0.141864	0.633575	-0.168677	0.302128	0.867764	0.0732752	0.689205	1	0.166169	0.327676	1	-0.092895	0.621124	1
ENSG00000206337		green	-0.624527	4.68175e-05	HCP5	1248.15	0.724653	0.00839574		0.531262	0.00467636	0.226641	0.523592	0.00997227		0.560922	0.00373062		-0.0076599	0.970533	1	0.0296689	0.881337	1	-0.0373287	0.859458	1
ENSG00000141582		green	0.621403	5.23944e-05	CBX4	2197.75	-0.429991	0.0164006	0.356165	-0.386336	0.00813165	0.283301	-0.366997	0.0291339	0.412195	-0.383144	0.0121963	0.365814	0.019335	0.911238	1	0.00319031	0.984012	1	0.0161445	0.927862	1
ENSG00000131669		green	0.620841	5.34599e-05	NINJ1	587.605	-0.616377	0.174543		-0.444441	0.0353789		-0.265888	0.174008		-0.359749	0.0824067		0.178625	0.351429	1	0.084725	0.676799	1	0.0939028	0.61657	1
ENSG00000123066		green	0.614887	6.60037e-05	MED13L	6234.76	-0.399089	0.025208	0.433446	-0.355078	0.00985539	0.306325	-0.346056	0.0306354	0.423127	-0.322356	0.0256151	0.46674	0.0090181	0.95648	1	0.0327239	0.828049	1	-0.0237062	0.889207	1
ENSG00000198355		green	0.614148	6.77343e-05	PIM3	4440.66	-0.416914	0.0203065	0.393089	-0.472445	0.00779843	0.27949	-0.336904	0.0850613	0.559778	-0.478915	0.00916082	0.327957	0.135557	0.49861	1	-0.00647524	0.972763	1	0.142034	0.487068	1
ENSG00000140455		green	0.613183	7.00529e-05	USP3	3813.15	-0.463994	0.00297123	0.177918	-0.431883	0.0012631	0.121914	-0.406197	0.00943763	0.277851	-0.371459	0.00831157	0.31625	0.0256821	0.873758	1	0.0604269	0.680913	1	-0.0347454	0.834746	1
ENSG00000266094		green	0.611417	7.44861e-05	RASSF5	8441.79	-0.334749	0.0499301	0.557801	-0.36363	0.00829405	0.283301	-0.290861	0.0694905	0.530407	-0.22418	0.121023	0.706098	0.0727693	0.659981	1	0.139459	0.355136	1	-0.0666904	0.69539	1
ENSG00000171223		green	0.610583	7.66651e-05	JUNB	38748.4	-0.250063	0.186998	0.809838	-0.103628	0.437469	0.893477	-0.217855	0.162492	0.650545	-0.291074	0.0379606	0.507085	-0.114239	0.478254	1	-0.187461	0.200437	1	0.0732223	0.659178	1
ENSG00000095370		green	-0.609258	8.02471e-05	SH2D3C	2576.43	0.411459	0.0973071	0.687085	0.365737	0.0214193	0.403548	0.329448	0.067443	0.525797	0.162721	0.326324	0.884885	-0.036284	0.844722	1	-0.203037	0.237918	1	0.166755	0.380012	1
ENSG00000144791		green	-0.609013	8.09251e-05	LIMD1	3089.39	0.187967	0.000718781	0.083253	0.478585	0.000156651	0.0371263	0.183417	0.218528	0.701515	0.402809	0.00251062	0.198325	-0.295189	0.0553639	1	-0.0757787	0.586383	1	-0.219412	0.16746	1
ENSG00000232442		green	-0.603663	9.70925e-05	CTD-3184A7.4	757.696	0.565758	0.104804		0.537293	0.0134136		0.314719	0.144743		0.303975	0.163557		-0.222626	0.303061	1	-0.233374	0.287242	1	0.0107493	0.96025	1
ENSG00000117036		green	0.603193	9.86441e-05	ETV3	1974.31	-0.525882	0.0584418	0.587164	-0.454539	0.031104	0.479521	-0.348861	0.105598	0.592723	-0.529208	0.0132362	0.384623	0.1057	0.626971	1	-0.0746942	0.730092	1	0.180397	0.40904	1
ENSG00000028137	Yes	green	0.602575	0.000100716	TNFRSF1B	11942.2	-0.462163	0.00219335	0.156355	-0.353945	0.00176813	0.145756	-0.413267	0.00219567	0.153525	-0.11329	0.34328	0.892779	-0.059332	0.671124	1	0.240668	0.0546373	1	-0.300002	0.0377887	1
ENSG00000111679		green	-0.601391	0.000104797	PTPN6	18782.8	0.114597	0.0577761	0.586208	0.208694	0.0104244	0.317556	0.111558	0.261974	0.741058	0.169788	0.0497613	0.553377	-0.0971382	0.346774	1	-0.0389063	0.668974	1	-0.058232	0.586606	1
ENSG00000188042		green	0.601222	0.000105393	ARL4C	16258.8	-0.052124	0.0344081	0.496406	-0.487195	0.00434058	0.218489	-0.0709618	0.709149	0.946884	-0.146421	0.408873	0.917416	0.416291	0.0329036	1	0.340816	0.063084	1	0.0754762	0.705151	1
ENSG00000185728		green	0.60045	0.000108148	YTHDF3	2043.95	-0.454853	0.0727114	0.631619	-0.444738	0.013611	0.347173	-0.33348	0.0916365	0.580828	-0.125738	0.499724	0.94115	0.111264	0.582293	1	0.319045	0.0967174	1	-0.207785	0.313555	1
ENSG00000044574		green	0.595995	0.000125348	HSPA5	9880.9	-0.338415	0.0186434	0.377152	-0.324264	0.00723402	0.267702	-0.305352	0.0326468	0.42969	-0.29828	0.0191072	0.442726	0.0189098	0.898245	1	0.0259841	0.845317	1	-0.00707459	0.963045	1
ENSG00000139718		green	0.595642	0.00012681	SETD1B	3446.24	-0.557676	0.00110462	0.097271	-0.262413	0.0411662	0.521755	-0.486099	0.00128877	0.125305	-0.461135	0.000651684	0.0972095	-0.223709	0.151861	1	-0.198736	0.159737	1	-0.0249735	0.876748	1
ENSG00000226564		green	0.59014	0.000151686	FTH1P20	271.417	-0.718043	0.0340363		-0.579279	0.00517067		-0.449071	0.0361017		-0.354129	0.0926391		0.130224	0.548053	1	0.225199	0.293012	1	-0.0949773	0.663586	1
ENSG00000124882	Yes	green	0.585702	0.000174853	EREG	1418.21	-1.08807	0.0159541	0.354592	-0.66375	0.00223227	0.160144	-0.427165	0.0373407	0.442092	-0.236494	0.270051	0.855258	0.236671	0.242553	1	0.427425	0.0438225	1	-0.190761	0.338671	1
ENSG00000148841		green	0.585414	0.00017646	ITPRIP	2952.93	-0.69825	0.0399101	0.508968	-0.384494	0.0311082	0.479521	-0.505457	0.0100143	0.282266	-0.341046	0.0645757	0.598446	-0.120999	0.547033	1	0.0434523	0.819459	1	-0.164454	0.422262	1
ENSG00000197063		green	0.58258	0.000193003	MAFG	1944.45	-0.409051	0.056587	0.582872	-0.365005	0.0240883	0.430863	-0.334926	0.0667	0.522828	-0.374261	0.026387	0.46674	0.0300767	0.872731	1	-0.00925851	0.957765	1	0.0393353	0.837982	1
ENSG00000185432		green	-0.582524	0.000193344	METTL7A	4607.96	0.696737	0.0439056	0.522124	0.299918	0.0773629	0.617097	0.520433	0.0060062	0.225863	0.255801	0.146869	0.744136	0.220557	0.256411	1	-0.0441227	0.808884	1	0.264684	0.182856	1
ENSG00000109971		green	-0.579471	0.000212741	HSPA8	14907.4	0.509337	1.43116e-05	0.009182	0.5115	2.74116e-05	0.0215049	0.461537	0.00137206	0.125305	0.54449	2.27672e-05	0.0374879	-0.0499625	0.737657	1	0.0329929	0.80616	1	-0.0829556	0.590094	1
ENSG00000140391	Yes	green	-0.577358	0.000227164	TSPAN3	2308.19	0.641304	0.0428539	0.51459	0.396639	0.0211759	0.403548	0.482728	0.0116206	0.288352	0.293358	0.100355	0.680441	0.0861137	0.660627	1	-0.103293	0.575702	1	0.189409	0.344643	1
ENSG00000173992		green	-0.574607	0.000247259	CCS	1626.27	0.579444	0.00304158	0.179733	0.666957	0.000257074	0.0522227	0.434792	0.029199	0.412195	0.293305	0.119597	0.702946	-0.232188	0.254616	1	-0.373704	0.0541429	1	0.141518	0.495477	1
ENSG00000184557		green	0.567515	0.00030659	SOCS3	3424.22	-0.498111	0.213773	0.832565	-0.404077	0.0485223	0.533003	-0.321663	0.13151	0.62079	-0.287306	0.168511	0.774218	0.082423	0.70284	1	0.116794	0.582552	1	-0.0343721	0.874687	1
ENSG00000105835		green	0.565617	0.000324482	NAMPT	3277.21	-0.354284	0.243544	0.852311	-0.421003	0.0411552	0.521755	-0.238882	0.264041	0.742666	-0.205019	0.328435	0.885057	0.182157	0.400117	1	0.216031	0.311473	1	-0.0338743	0.876633	1
ENSG00000275993		green	0.561787	0.000363466	CH507-42P11.8	2981.61	-0.262984	0.00802731	0.277662	-0.665738	0.000582824	0.0786591	-0.23154	0.263312	0.742015	-0.343196	0.084092	0.644378	0.43428	0.0394089	1	0.322598	0.113208	1	0.111684	0.601493	1
ENSG00000070476		green	0.561656	0.000364868	ZXDC	1786.6	-0.696212	0.0887146	0.66859	-0.255527	0.151579	0.719683	-0.491209	0.0122732	0.289067	-0.281858	0.126335	0.708656	-0.235737	0.240437	1	-0.0263351	0.889895	1	-0.209406	0.306617	1
ENSG00000174010		green	0.559154	0.000392626	KLHL15	1374.89	-0.660325	0.139273	0.750906	-0.423214	0.0379278	0.507607	-0.401453	0.059272	0.511444	-0.208764	0.315171	0.876449	0.0217489	0.919697	1	0.214494	0.311214	1	-0.19275	0.376013	1
ENSG00000028528		green	-0.557489	0.000412141	SNX1	4663.37	0.316538	0.112664	0.700793	0.360119	0.021497	0.403548	0.257991	0.147354	0.636704	0.105617	0.518199	0.949333	-0.102133	0.577176	1	-0.254528	0.13375	1	0.152397	0.41742	1
ENSG00000107937		green	0.556765	0.000420884	GTPBP4	1284.96	-0.867157	0.0269519		-0.475229	0.0170944	0.380576	-0.553031	0.00858731		-0.421484	0.0386509		-0.0778404	0.715796	1	0.0537526	0.796377	1	-0.131596	0.542935	1
ENSG00000053918		green	0.554758	0.00044601	KCNQ1	3356.54	-0.539823	0.00507642	0.234038	-0.434039	0.00196339	0.155108	-0.45772	0.00489517	0.203306	-0.287747	0.0503863	0.553377	-0.0236925	0.887762	1	0.146303	0.340034	1	-0.169997	0.325149	1
ENSG00000185022		green	0.55342	0.000463491	MAFF	525.86	-0.67134	0.0809053		-0.322107	0.10214		-0.2479	0.163601		-0.466921	0.0147207		0.0742373	0.667368	1	-0.144895	0.435834	1	0.219141	0.190998	1
ENSG00000116977		green	0.552104	0.000481273	LGALS8	4389.15	-0.391687	0.000581919	0.076865	-0.498834	0.000101919	0.0356708	-0.343902	0.0226041	0.366497	-0.0808565	0.549362	0.951047	0.154936	0.320378	1	0.418005	0.0030626	1	-0.263071	0.101805	1
ENSG00000164975		green	-0.551281	0.000492692	SNAPC3	619.406	1.2157	0.224354		0.243539	0.263783		0.440093	0.0335174		0.221779	0.303698		0.19663	0.336761	1	-0.0217661	0.918845	1	0.218402	0.279168	1
ENSG00000099875		green	0.550581	0.000502613	MKNK2	11673.1	-0.385813	0.00388027	0.202631	-0.260484	0.00489662	0.231267	-0.359428	0.00135606	0.125305	-0.174225	0.0758827	0.61808	-0.0989516	0.395209	1	0.0862618	0.40279	1	-0.185214	0.12456	1
ENSG00000165233		green	0.548143	0.000538527	C9orf89	1810.1	-1.04474	0.0026084	0.173608	-0.464542	0.0115772	0.327618	-0.717693	0.000344059	0.0982811	-0.436789	0.0214063	0.459558	-0.253224	0.21653	1	0.0277552	0.887076	1	-0.280985	0.17798	1
ENSG00000197872		green	0.547281	0.00055175	FAM49A	3254.85	-0.432272	0.0439948	0.522124	-0.359394	0.0120135	0.331019	-0.361456	0.0289114	0.41101	-0.161479	0.281527	0.859368	-0.00207092	0.990318	1	0.197931	0.205247	1	-0.200004	0.254572	1
ENSG00000168216	Yes	green	-0.54437	0.000598614	LMBRD1	1927.66	0.354983	0.0114421	0.314485	0.269304	0.0504587	0.539491	0.312101	0.0513534	0.489992	0.463858	0.00132596	0.137992	0.0428027	0.795694	1	0.19457	0.196613	1	-0.151768	0.372576	1
ENSG00000174915		green	0.540289	0.000670237	PTDSS2	653.127	-1.46785	1.40203e-05		-0.838094	2.85261e-05		-0.912896	1.51109e-05		-0.584859	0.0042682		-0.0748617	0.726811	1	0.253284	0.225779	1	-0.328154	0.129881	1
ENSG00000120709		green	0.538159	0.000710573	FAM53C	2732.35	-0.320739	0.0555002	0.579444	-0.386991	0.00946697	0.30049	-0.275585	0.107432	0.593019	-0.280995	0.0716949	0.610752	0.111413	0.52766	1	0.106004	0.513812	1	0.00540901	0.976192	1
ENSG00000092929		green	-0.535642	0.000760987	UNC13D	4202.76	0.397729	0.0535439	0.575667	0.197828	0.0954153	0.651527	0.352893	0.0121452	0.288518	0.242325	0.0528024	0.555978	0.15508	0.286819	1	0.0444998	0.734002	1	0.110581	0.462146	1
ENSG00000136059		green	-0.535353	0.000766966	VILL	811.354	0.335605	0.173344		0.316838	0.144918		0.217674	0.313081		0.475362	0.0293718		-0.0991935	0.646252	1	0.158569	0.469646	1	-0.257768	0.231897	1
ENSG00000196843		green	0.532063	0.000838121	ARID5A	1824.93	-0.459061	0.0118828	0.314485	-0.46266	0.00806316	0.283301	-0.370448	0.0553592	0.505576	-0.521756	0.00393867	0.242305	0.0922197	0.641628	1	-0.0591091	0.751894	1	0.15133	0.454479	1
ENSG00000135624		green	-0.53194	0.000840894	CCT7	4629.56	0.261677	0.100051	0.690409	0.178277	0.0627018	0.585238	0.241521	0.0369887	0.442092	0.050123	0.621478	0.967842	0.0632497	0.598348	1	-0.128159	0.229134	1	0.191409	0.123839	1
ENSG00000150991		green	0.524549	0.00102294	UBC	32773.2	-0.222657	0.0446267	0.524406	-0.210292	0.0122212	0.331019	-0.211585	0.0385738	0.442906	-0.1489	0.0947107	0.667874	-0.00129459	0.990271	1	0.0613939	0.512254	1	-0.0626887	0.569102	1
ENSG00000124587		green	-0.523173	0.00106045	PEX6	1245.22	0.875211	0.00173454		0.620715	0.000594645	0.0786591	0.637262	0.00129467		0.388813	0.0374108		0.0165672	0.934825	1	-0.231933	0.228272	1	0.248504	0.228798	1
ENSG00000090061		green	0.522757	0.00107202	CCNK	1579.66	-0.162302	0.098919	0.6889	-0.42258	0.0119261	0.331019	-0.145727	0.43818	0.858713	-0.156014	0.371605	0.903768	0.276887	0.151308	1	0.266597	0.140329	1	0.0102905	0.958419	1
ENSG00000109062		green	0.521101	0.0011192	SLC9A3R1	2865.2	-0.440676	0.0267308	0.442124	-0.509448	0.00295858	0.189083	-0.347343	0.0686118	0.529375	-0.238339	0.180246	0.776882	0.162118	0.407301	1	0.271143	0.140482	1	-0.109026	0.585551	1
ENSG00000165168	Yes	green	-0.519759	0.00115877	CYBB	11760.1	0.205664	0.0986606	0.6889	0.161421	0.148288	0.717787	0.190039	0.153912	0.641878	0.284956	0.0157027	0.410996	0.0286207	0.835722	1	0.123542	0.317489	1	-0.0949215	0.505905	1
ENSG00000224183		green	0.519016	0.00118119	SDHDP6	30.0285	-3.8476	0.0437704		-0.122997	0.427565		-0.20534	0.128627		-0.169586	0.253489		-0.082392	0.523432	1	-0.0466144	0.74255	1	-0.0357793	0.772271	1
ENSG00000007923		green	-0.518196	0.00120641	DNAJC11	1595.2	0.345595	0.0405601	0.511672	0.394702	0.0175816	0.383122	0.289289	0.120788	0.607485	0.441811	0.0105917	0.343489	-0.105424	0.581838	1	0.0471172	0.792384	1	-0.152542	0.436222	1
ENSG00000126456		green	-0.51801	0.00121218	IRF3	3380.71	0.487157	0.078128	0.652897	0.105355	0.514938	0.90783	0.378832	0.038028	0.442906	0.353442	0.0359558	0.499696	0.273517	0.145039	1	0.248116	0.155672	1	0.0254025	0.894906	1
ENSG00000089159		green	0.517353	0.00123281	PXN	4903.66	-0.4617	0.00718612	0.263738	-0.285735	0.0126838	0.33871	-0.41387	0.00243148	0.158936	-0.273181	0.0239979	0.46674	-0.128148	0.364575	1	0.0125545	0.921113	1	-0.140703	0.335397	1
ENSG00000135643	Yes	green	-0.517326	0.00123367	KCNMB4	95.1678	10.2859	1.85717e-05		0.250156	0.0399859		0.194837	0.062782		0.16008	0.167514		-0.0553473	0.577527	1	-0.0901232	0.41277	1	0.0347773	0.713087	1
ENSG00000183283		green	0.516738	0.00125239	DAZAP2	14724	-0.307336	1.28579e-05	0.009182	-0.288408	1.43545e-05	0.0163297	-0.29793	0.000272161	0.0982811	-0.227699	0.00128836	0.137992	-0.00952327	0.910845	1	0.0607103	0.415177	1	-0.0702337	0.426482	1
ENSG00000124491		green	0.515787	0.00128319	F13A1	5224.51	-0.313511	0.0977137	0.687085	-0.542848	0.0117943	0.331015	-0.220889	0.306951	0.791301	-0.260098	0.230925	0.822989	0.322048	0.138009	1	0.282827	0.196269	1	0.0392221	0.856672	1
ENSG00000163348		green	-0.515041	0.00130785	PYGO2	821.198	0.750165	0.0681964		0.558016	0.00983491		0.410027	0.0578252		0.379165	0.0812852		-0.148016	0.494949	1	-0.178891	0.414125	1	0.0308765	0.886731	1
ENSG00000111300		green	0.51351	0.00135971	NAA25	1027.99	-0.536425	0.0015114		-0.394326	0.0403894	0.516258	-0.409563	0.0470602		-0.782821	7.47483e-05		-0.0152429	0.942184	1	-0.388577	0.0552793	1	0.37334	0.080089	1
ENSG00000198900		green	-0.512983	0.001378	TOP1	2865.61	0.343923	0.146946	0.753348	0.270726	0.0453281	0.52812	0.29497	0.0615445	0.511833	0.166117	0.242349	0.83424	0.0242512	0.881655	1	-0.104616	0.480394	1	0.128869	0.442571	1
ENSG00000171867	Yes	green	0.511469	0.00143171	PRNP	3467.64	-0.477752	0.0510444	0.56049	-0.263105	0.0529631	0.54637	-0.404652	0.0106802	0.288234	-0.238504	0.0948423	0.667874	-0.141566	0.387048	1	0.0246025	0.868852	1	-0.166171	0.32428	1
ENSG00000160741		green	0.510645	0.00146168	CRTC2	3170	-0.27807	0.133078	0.744145	-0.174895	0.17145	0.7463	-0.24611	0.101694	0.589917	-0.291829	0.0301676	0.483458	-0.0712226	0.646804	1	-0.116943	0.405845	1	0.04572	0.775529	1
ENSG00000120253		green	-0.510123	0.00148098	NUP43	663.224	1.01196	0.0925472		0.458157	0.0366571		0.450544	0.0338497		0.462015	0.0343577		-0.00760437	0.971279	1	0.00386353	0.985844	1	-0.0114677	0.956318	1
ENSG00000163162	Yes	green	0.509114	0.0015189	RNF149	2073.61	-0.655124	0.171374	0.787253	-0.236865	0.198855	0.772828	-0.444086	0.0269564	0.401905	-0.234946	0.216708	0.814169	-0.207273	0.312292	1	0.00191946	0.992177	1	-0.209197	0.316416	1
ENSG00000178082		green	0.507095	0.00159734	TWF1P1	85.9422	-5.28906	0.0340676		-0.270263	0.0605647		-0.279991	0.0249862		-0.234793	0.0880771		-0.00973999	0.934794	1	0.0354887	0.786767	1	-0.045231	0.690875	1
ENSG00000168566		green	-0.506584	0.00161773	SNRNP48	891.398	1.0869	0.0366663		0.389486	0.0687105		0.556605	0.0100355		0.0975885	0.651412		0.167179	0.442098	1	-0.291974	0.180838	1	0.459163	0.0351133	1
ENSG00000239306		green	-0.50653	0.0016199	RBM14	1682.23	0.594351	0.000434085	0.064983	0.505123	0.00263523	0.178443	0.482856	0.0101776	0.282888	0.705199	5.32737e-05	0.044524	-0.0222642	0.908081	1	0.200103	0.267931	1	-0.22237	0.259606	1
ENSG00000078061		green	0.505232	0.00167286	ARAF	3717.09	-0.427349	0.000521109	0.073134	-0.29019	0.0162669	0.371849	-0.385736	0.00698825	0.241903	-0.502078	8.0684e-05	0.044524	-0.0955552	0.518391	1	-0.211901	0.111828	1	0.116347	0.446388	1
ENSG00000112137		green	0.505099	0.00167836	PHACTR1	2719.47	-0.100558	0.159227	0.772168	-0.198667	0.200818	0.772828	-0.100836	0.568562	0.911508	-0.360377	0.026254	0.46674	0.0978444	0.590897	1	-0.161729	0.337056	1	0.259576	0.164635	1
ENSG00000241973		green	0.502714	0.00177985	PI4KA	6422.22	-0.17435	0.0532146	0.574488	-0.312949	0.00610031	0.244399	-0.163358	0.229409	0.710136	-0.182554	0.129729	0.712751	0.149598	0.287781	1	0.130401	0.301511	1	0.0191973	0.894992	1
ENSG00000073861		green	-0.501133	0.00185012	TBX21	59.864	5.1952	0.0232262		0.129101	0.189861		0.0781907	0.352433		0.156468	0.0942367		-0.0509393	0.521715	1	0.0273812	0.756693	1	-0.0783238	0.299222	1
ENSG00000008083		green	0.49844	0.00197534	JARID2	3379.56	-0.448127	0.107672	0.690794	-0.279338	0.0574494	0.562636	-0.368322	0.0295062	0.412626	-0.212591	0.167198	0.774218	-0.0890016	0.609868	1	0.0667532	0.676965	1	-0.155757	0.384991	1
ENSG00000273559		green	0.496203	0.00208496	CWC25	1382.62	-0.839429	0.0128038	0.330471	-0.417011	0.0269941	0.454267	-0.578542	0.00451079	0.202433	-0.498896	0.0101629	0.343489	-0.161579	0.436987	1	-0.0819024	0.681338	1	-0.0796795	0.706081	1
ENSG00000142192	Yes	green	0.495412	0.00212496	APP	6312.28	-0.419283	0.0283049	0.447119	-0.259627	0.0245938	0.435792	-0.372601	0.00670318	0.241903	-0.145721	0.231982	0.82456	-0.112987	0.427088	1	0.113912	0.3723	1	-0.2269	0.12271	1
ENSG00000111540		green	-0.495363	0.00212746	RAB5B	3101	-0.0154039	0.100344	0.690409	0.177605	0.0923259	0.641993	-0.00534916	0.966313	0.993513	0.228608	0.0405092	0.517939	-0.182965	0.163218	1	0.0510063	0.662896	1	-0.233972	0.0848112	1
ENSG00000167470		green	0.495076	0.00214218	MIDN	4106.96	-0.536834	0.10383	0.69074	-0.148678	0.400797	0.888438	-0.39032	0.0455211	0.468292	-0.388812	0.0338107	0.487556	-0.241688	0.226598	1	-0.240169	0.204043	1	-0.00151984	0.994054	1
ENSG00000204209		green	-0.493431	0.00222814	DAXX	1820.36	1.03652	0.0033065	0.185012	0.554509	0.00374783	0.204133	0.700832	0.000650266	0.103926	0.415273	0.0346905	0.491711	0.146368	0.484774	1	-0.139258	0.490041	1	0.285631	0.179342	1
ENSG00000173726		green	0.491299	0.00234406	TOMM20	5070.97	-0.160581	0.122281	0.722584	-0.18255	0.144004	0.71384	-0.149448	0.310372	0.793212	-0.310208	0.0184201	0.436136	0.0331044	0.82797	1	-0.127668	0.353542	1	0.160773	0.306475	1
ENSG00000197724		green	0.487737	0.00254952	PHF2	2283.63	-0.378524	0.213563	0.832565	-0.370346	0.0434288	0.525829	-0.282064	0.158496	0.645984	-0.227428	0.229504	0.822989	0.0882888	0.665883	1	0.142939	0.463305	1	-0.054651	0.792936	1
ENSG00000104886		green	-0.487577	0.00255907	PLEKHJ1	1754.21	0.257293	0.140746	0.750906	0.36783	0.0206632	0.403548	0.215199	0.232254	0.712683	0.163942	0.322647	0.884116	-0.152643	0.409931	1	-0.203908	0.235827	1	0.0512657	0.787237	1
ENSG00000111371	Yes	green	-0.48673	0.00261036	SLC38A1	9910.33	0.267867	0.106366	0.69074	0.257115	0.0315377	0.480835	0.237557	0.0936741	0.582855	0.0559552	0.657257	0.969526	-0.019555	0.8939	1	-0.201171	0.127398	1	0.181617	0.230393	1
ENSG00000132676		green	-0.484291	0.00276305	DAP3	2937.55	0.448602	0.0168649	0.361804	0.262878	0.0518058	0.543791	0.387851	0.0139046	0.309677	0.398977	0.00495163	0.260689	0.124988	0.44266	1	0.13611	0.358215	1	-0.0111214	0.94713	1
ENSG00000271614		green	0.483329	0.00282535	LINC00936	760.059	-0.863742	0.0404494		-0.557871	0.0085425		-0.489752	0.0232931		-0.352489	0.100494		0.0681185	0.754222	1	0.205432	0.344343	1	-0.137318	0.529444	1
ENSG00000145675		green	0.480607	0.00300839	PIK3R1	2792.77	-0.71836	0.0272281	0.442788	-0.375321	0.0276086	0.459174	-0.533636	0.00495752	0.203306	-0.281806	0.111115	0.689368	-0.158355	0.416358	1	0.0935268	0.609269	1	-0.251886	0.20601	1
ENSG00000068724		green	0.478351	0.00316787	TTC7A	8838.81	-0.304967	0.0352627	0.496406	-0.168352	0.0750701	0.613808	-0.284031	0.0130795	0.300562	-0.225347	0.0245835	0.46674	-0.115687	0.329822	1	-0.0569974	0.588244	1	-0.0586897	0.633219	1
ENSG00000113742		green	0.476437	0.00330886	CPEB4	1373.96	-0.630122	0.0881152	0.668455	-0.38222	0.038422	0.509152	-0.432301	0.0314411	0.42488	-0.145786	0.443902	0.918771	-0.0501082	0.807192	1	0.23647	0.227614	1	-0.286583	0.170241	1
ENSG00000178685		green	-0.474618	0.00344787	PARP10	3949.78	0.274597	0.249581	0.852311	0.313119	0.0491419	0.534453	0.226517	0.209019	0.696995	0.188789	0.255259	0.84769	-0.0866077	0.640435	1	-0.124342	0.470268	1	0.0377346	0.842658	1
ENSG00000106003		green	-0.474452	0.00346076	LFNG	2131.58	0.560185	0.236447	0.851227	0.235989	0.196559	0.771585	0.393984	0.0483399	0.47882	0.242095	0.199427	0.796359	0.158031	0.438543	1	0.00610737	0.974925	1	0.151926	0.464654	1
ENSG00000109321	Yes	green	0.470689	0.00376556	AREG	3021.83	-0.676779	0.1634	0.776425	-0.387787	0.0585488	0.565408	-0.264288	0.15838	0.645984	-0.411721	0.0395861	0.514246	0.12355	0.499006	1	-0.0239514	0.902399	1	0.147506	0.407361	1
ENSG00000131979		green	0.470158	0.00381034	GCH1	1014.46	-0.450887	0.125439		-0.458659	0.0191875	0.394001	-0.314252	0.131611		-0.227845	0.256375		0.144427	0.495888	1	0.230856	0.261419	1	-0.0864309	0.687558	1
ENSG00000115419		green	-0.467278	0.00406167	GLS	2685.2	0.510862	0.146401	0.752272	0.284377	0.0885974	0.631506	0.392446	0.0359316	0.438131	0.264638	0.127424	0.708656	0.108093	0.573566	1	-0.01974	0.912557	1	0.127834	0.51539	1
ENSG00000105127		green	0.465169	0.00425464	AKAP8	2015.96	-0.353364	0.0479068	0.541285	-0.264693	0.0961187	0.653453	-0.295421	0.10122	0.589917	-0.451558	0.00648523	0.290214	-0.0307346	0.868324	1	-0.186888	0.277724	1	0.156154	0.411353	1
ENSG00000240065		green	-0.463661	0.00439747	PSMB9	3198.23	0.687342	0.019951	0.387879	0.281188	0.0825933	0.624438	0.534849	0.00343152	0.189136	0.370233	0.028203	0.467438	0.253703	0.17684	1	0.0890559	0.610718	1	0.164649	0.392276	1
ENSG00000070047		green	-0.46223	0.00453679	PHRF1	1666.77	0.311326	0.181311	0.800659	0.411554	0.0314771	0.480835	0.237309	0.248339	0.730018	0.290627	0.139457	0.727356	-0.174272	0.405573	1	-0.120944	0.548924	1	-0.0533279	0.80207	1
ENSG00000198015		green	-0.461851	0.00457435	MRPL42	933.84	0.550445	0.143885		0.47636	0.0262779		0.325667	0.132017		0.371512	0.0858606		-0.150724	0.488177	1	-0.104869	0.631066	1	-0.0458555	0.833215	1
ENSG00000125812		green	0.460205	0.00474048	GZF1	1162.71	-0.608105	0.0616824		-0.442284	0.0237605	0.428549	-0.387174	0.0630398		-0.053282	0.79046		0.055101	0.794899	1	0.389073	0.0581466	1	-0.333978	0.119991	1
ENSG00000178188		green	-0.460142	0.00474698	SH2B1	2738.25	0.366167	0.0754898	0.644533	0.313396	0.0284367	0.461273	0.313447	0.05805	0.511444	0.311649	0.0376153	0.506186	5.60958e-05	0.999738	1	-0.00174519	0.991083	1	0.00180156	0.991807	1
ENSG00000159216		green	0.45916	0.00484861	RUNX1	2717.72	-0.387629	0.155412	0.772168	-0.341788	0.037364	0.506015	-0.308179	0.0951996	0.582855	-0.228749	0.180621	0.776882	0.033605	0.85943	1	0.11305	0.523222	1	-0.0794467	0.682619	1
ENSG00000106682		green	0.457438	0.00503158	EIF4H	9414.98	-0.148538	0.0893239	0.66859	-0.221203	0.0187023	0.388594	-0.139299	0.22119	0.705005	-0.0219654	0.825631	0.983843	0.0819054	0.488032	1	0.199245	0.057085	1	-0.11734	0.337559	1
ENSG00000113732		green	-0.456419	0.00514262	ATP6V0E1	3189.46	0.196731	0.14529	0.750906	0.339975	0.0212037	0.403548	0.174405	0.304052	0.786947	0.194036	0.208951	0.806082	-0.165584	0.343688	1	-0.145951	0.363808	1	-0.0196332	0.913021	1
ENSG00000106617		green	0.45572	0.00521999	PRKAG2	1692.96	-0.126056	0.159656	0.772168	-0.245785	0.206689	0.778088	-0.125697	0.545021	0.900605	-0.442372	0.0267347	0.46674	0.120114	0.569967	1	-0.19663	0.336485	1	0.316749	0.139528	1
ENSG00000174574		green	0.455246	0.005273	AKIRIN1	3663.51	-0.349737	0.0571146	0.584086	-0.2612	0.0353676	0.498112	-0.31031	0.0341674	0.436463	-0.270533	0.0385742	0.507705	-0.049118	0.745808	1	-0.00933439	0.945588	1	-0.0397841	0.799176	1
ENSG00000231925		green	-0.453956	0.00541965	TAPBP	10834.2	0.253987	0.0358039	0.496406	0.157247	0.118801	0.682585	0.236425	0.0514785	0.490141	0.29116	0.00636738	0.287818	0.0791831	0.529212	1	0.133919	0.231726	1	-0.0547362	0.674371	1
ENSG00000100599		green	0.45083	0.00578983	RIN3	9697.68	-0.283223	0.094	0.679797	-0.25059	0.0293021	0.46688	-0.256386	0.0610005	0.511444	-0.1982	0.102493	0.685586	-0.0057996	0.967347	1	0.0523929	0.680235	1	-0.058193	0.691017	1
ENSG00000143514		green	0.450691	0.00580682	TP53BP2	1490.47	-0.492599	0.0620761	0.599535	-0.322594	0.0990207	0.658378	-0.352099	0.0908804	0.577684	-0.525761	0.00873725	0.320485	-0.0295165	0.889232	1	-0.203211	0.322334	1	0.173697	0.418701	1
ENSG00000198089		green	-0.445426	0.00648117	SFI1	1484.14	0.568214	0.0617202	0.598548	0.309312	0.0939889	0.645462	0.381834	0.0574514	0.511444	-0.0613477	0.747466	0.973822	0.0725502	0.723839	1	-0.370719	0.0586441	1	0.443276	0.0339323	1
ENSG00000205413		green	-0.445386	0.00648649	SAMD9	1680.04	0.914307	0.00868047	0.288944	0.269037	0.134796	0.698286	0.636207	0.00127034	0.125305	0.135152	0.467464	0.93028	0.367245	0.0690499	1	-0.133906	0.484989	1	0.501158	0.0149486	1
ENSG00000167118		green	0.443617	0.00672791	URM1	1725.99	0.0604654	0.00409884	0.207284	-0.541061	0.0010701	0.118503	0.0015659	0.993271	0.998131	-0.305237	0.0759845	0.61808	0.542702	0.00443829	1	0.235849	0.185809	1	0.306856	0.116025	1
ENSG00000086189		green	-0.44214	0.00693526	DIMT1	555.03	0.637207	0.118544		0.466435	0.0324311		0.309773	0.150286		0.074268	0.733992		-0.156691	0.466911	1	-0.392275	0.0736452	1	0.23559	0.272259	1
ENSG00000106348		green	0.441561	0.00701798	IMPDH1	4253.16	-0.354249	0.126677	0.734091	-0.221543	0.0708404	0.604142	-0.309999	0.0324588	0.42969	-0.131822	0.307698	0.870817	-0.0884682	0.555149	1	0.0897261	0.506865	1	-0.178196	0.249565	1
ENSG00000139546		green	-0.440546	0.00716521	TARBP2	754.607	0.656571	0.167283		0.480772	0.0281201		0.327029	0.126578		0.324814	0.137576		-0.153779	0.471357	1	-0.155998	0.475873	1	0.00221927	0.991654	1
ENSG00000110344		green	-0.439293	0.00735038	UBE4A	2299.5	0.144791	0.188284	0.810129	0.381241	0.0343328	0.490666	0.125642	0.52497	0.890858	0.112966	0.544159	0.949333	-0.255635	0.20614	1	-0.268311	0.162265	1	0.0126758	0.950964	1
ENSG00000229659		green	0.437184	0.00767153	RP11-345K20.2	47.4261	-0.717587	0.000210201		-0.335232	0.0205877		-0.146177	0.244607		-0.148185	0.284412		0.189166	0.11416	1	0.187158	0.156019	1	0.00200774	0.986002	1
ENSG00000087086		green	0.437019	0.00769718	FTL	34922	-0.122261	0.0157091	0.35426	-0.319568	0.00130773	0.123973	-0.117643	0.326316	0.802534	-0.0955639	0.364035	0.901895	0.201932	0.104157	1	0.224012	0.0426308	1	-0.0220799	0.863742	1
ENSG00000173120		green	0.43584	0.0078824	KDM2A	9227.66	-0.259986	0.0281769	0.447119	-0.230863	0.0463199	0.531763	-0.239046	0.0827765	0.554542	-0.344506	0.00484942	0.258347	-0.00818471	0.954242	1	-0.11365	0.374856	1	0.105466	0.474272	1
ENSG00000175727		green	0.434915	0.00803051	MLXIP	6690.23	-0.438088	0.00415399	0.207284	-0.178868	0.123334	0.690475	-0.392427	0.0044716	0.202433	-0.385896	0.00163554	0.155724	-0.213576	0.134994	1	-0.20704	0.106589	1	-0.00653698	0.964687	1
ENSG00000196693		green	-0.433725	0.00822427	ZNF33B	875.212	0.636635	0.0854122		0.434041	0.039492		0.389081	0.0710842		0.499324	0.0193914		-0.0449628	0.836211	1	0.0653025	0.762889	1	-0.110267	0.613819	1
ENSG00000105339		green	0.432736	0.00838853	DENND3	5036.65	-0.30825	0.0119431	0.314485	-0.349286	0.0032805	0.19668	-0.28138	0.0458292	0.468891	-0.303896	0.015296	0.407437	0.067908	0.641435	1	0.045392	0.729294	1	0.022516	0.881161	1
ENSG00000127124		green	0.4311	0.0086662	HIVEP3	1445.01	-1.19154	0.00728202	0.263738	-0.307141	0.118856	0.682585	-0.678945	0.00116564	0.124196	-0.0569734	0.777612	0.973822	-0.371931	0.0802927	1	0.250215	0.225475	1	-0.622158	0.00386907	1
ENSG00000143653		green	0.430894	0.0087017	SCCPDH	145.576	-1.03997	0.198378		-0.310453	0.0440757		-0.191334	0.15465		-0.229146	0.120817		0.119183	0.353486	1	0.0813521	0.564343	1	0.0378328	0.758366	1
ENSG00000100393		green	0.430076	0.00884398	EP300	6884	-0.165313	0.0402364	0.509019	-0.11812	0.167726	0.746097	-0.15821	0.129148	0.615582	-0.257192	0.00466476	0.251504	-0.0400917	0.711026	1	-0.139076	0.145565	1	0.098985	0.377732	1
ENSG00000087460		green	0.429411	0.00896095	GNAS	24050.6	-0.162343	0.000935892	0.094032	-0.171059	0.00690991	0.260013	-0.158971	0.0417213	0.457605	-0.257131	0.000136959	0.044524	0.0120879	0.881572	1	-0.0860737	0.225517	1	0.0981617	0.244155	1
ENSG00000196177		green	-0.427735	0.00926198	ACADSB	654.557	0.560798	0.132853		0.3959	0.0422957		0.384639	0.0642892		0.368964	0.0650177		-0.0112538	0.957582	1	-0.0269379	0.895351	1	0.0156848	0.941708	1
ENSG00000099219	Yes	green	-0.42656	0.00947807	ERMP1	669.72	-0.362282	0.156608		0.0785397	0.710222		0.000780139	0.996821		0.392715	0.0581621		-0.0778038	0.685189	1	0.314289	0.122424	1	-0.392104	0.0367945	1
ENSG00000119844		green	-0.425607	0.00965661	AFTPH	3387.16	0.319956	0.0166681	0.359888	0.316275	0.0163436	0.371849	0.272273	0.0775162	0.545132	-0.0580163	0.67536	0.972231	-0.0439976	0.782433	1	-0.374318	0.00965308	1	0.330322	0.0443338	1
ENSG00000095564		green	0.424828	0.00980458	BTAF1	6026.46	-0.275432	0.03976	0.508968	-0.383216	0.00470177	0.226641	-0.244751	0.121551	0.607485	-0.22332	0.116772	0.695813	0.138473	0.396277	1	0.159907	0.281857	1	-0.0214344	0.898567	1
ENSG00000274272		green	0.424115	0.00994161	RP11-44M6.7	1222.91	-0.729924	0.0257957		-0.46354	0.0111074	0.326293	-0.51785	0.00941325		-0.303621	0.107193		-0.054338	0.789881	1	0.159942	0.410085	1	-0.214284	0.302193	1
ENSG00000136169		green	-0.421527	0.0104533	SETDB2	1423.89	0.720754	0.0802373	0.658863	0.336365	0.0700599	0.604142	0.497627	0.0136103	0.307607	0.246601	0.19768	0.794554	0.161303	0.433568	1	-0.0897778	0.648432	1	0.251085	0.230906	1
ENSG00000145725		green	-0.420942	0.010572	PPIP5K2	2488.26	0.162877	0.0930732	0.678951	0.387082	0.0144611	0.355449	0.143516	0.4241	0.85294	0.100044	0.54453	0.949333	-0.24359	0.187117	1	-0.287067	0.0938776	1	0.043477	0.818413	1
ENSG00000112697	Yes	green	0.41976	0.0108151	TMEM30A	4097.33	-0.334504	0.0335417	0.49067	-0.406234	0.00457946	0.226641	-0.2898	0.0801606	0.553578	-0.25471	0.0898198	0.658596	0.11644	0.495491	1	0.151536	0.332764	1	-0.0350961	0.841699	1
ENSG00000166226		green	0.418263	0.01113	CCT2	2661.16	0.136955	0.0228868	0.416415	-0.440335	0.00853381	0.288008	0.064337	0.731379	0.953962	-0.219358	0.207414	0.805009	0.504744	0.0087091	1	0.221001	0.21998	1	0.283747	0.149467	1
ENSG00000128563		green	0.416516	0.0115072	PRKRIP1	1373.65	-0.642551	0.160291	0.77405	-0.402427	0.0467443	0.531763	-0.397919	0.0606213	0.511444	-0.232538	0.260178	0.84769	0.00449302	0.983338	1	0.169923	0.419915	1	-0.165433	0.44651	1
ENSG00000196296		green	0.41504	0.0118344	ATP2A1	48.3664	-11.7508	4.17336e-10		-0.488785	0.000290401		-0.416451	0.000351709		-0.461027	0.000341314		0.0723741	0.513682	1	0.0277725	0.820484	1	0.0446035	0.673027	1
ENSG00000085511		green	0.414711	0.0119084	MAP3K4	1110.99	-0.562262	0.0735417		-0.305765	0.113866	0.680145	-0.392162	0.0580417		-0.48807	0.0139653		-0.0864228	0.681752	1	-0.182343	0.370366	1	0.095921	0.653682	1
ENSG00000087157		green	0.414407	0.0119771	PGS1	1392.35	-0.421897	0.0523601	0.57214	-0.426825	0.0132231	0.345013	-0.317306	0.0974335	0.58447	-0.0537678	0.763451	0.973822	0.109522	0.576944	1	0.373105	0.0434219	1	-0.263587	0.188791	1
ENSG00000078674		green	-0.414103	0.0120463	PCM1	2809.42	0.413653	0.136671	0.748146	0.253644	0.086809	0.628201	0.342522	0.0441875	0.46783	0.271375	0.0799702	0.63025	0.0888934	0.612283	1	0.0177337	0.912448	1	0.0711607	0.693008	1
ENSG00000188313		green	0.413152	0.0122644	PLSCR1	2914.78	-0.451195	0.0438565	0.522124	-0.13473	0.358903	0.866056	-0.371819	0.0278573	0.408726	-0.37922	0.0136521	0.388138	-0.237119	0.173614	1	-0.244514	0.126629	1	0.00739443	0.967077	1
ENSG00000166889		green	0.412377	0.0124446	PATL1	2473.14	-0.688014	0.0358599	0.496406	-0.338752	0.0570617	0.562636	-0.501511	0.0105105	0.286863	-0.413938	0.0246383	0.46674	-0.162799	0.417231	1	-0.0751988	0.692384	1	-0.0876024	0.66869	1
ENSG00000148218		green	-0.412367	0.0124469	ALAD	2127.28	0.122809	0.0502975	0.558013	0.272388	0.104307	0.665827	0.12609	0.501701	0.87944	0.463353	0.00783963	0.305064	-0.146321	0.447526	1	0.190991	0.289731	1	-0.337316	0.0869685	1
ENSG00000185624		green	0.411917	0.0125528	P4HB	9504.43	-0.421848	0.00219028	0.156355	-0.0983356	0.238048	0.802278	-0.395297	0.00010088	0.0644914	-0.130016	0.141804	0.732763	-0.296974	0.00489063	1	-0.0316815	0.733511	1	-0.265293	0.0153475	1
ENSG00000151690	Yes	green	-0.410791	0.0128205	MFSD6	1200.87	0.625855	0.00681058		0.360469	0.0401024	0.514903	0.478861	0.013627		0.599212	0.000985749		0.118416	0.551467	1	0.238777	0.20353	1	-0.120362	0.553143	1
ENSG00000164244		green	0.410539	0.0128812	PRRC1	1314	-0.663947	0.0701174		-0.396185	0.0382515	0.509152	-0.455686	0.0265761		-0.383219	0.0511832		-0.0595266	0.776283	1	0.0129656	0.948746	1	-0.0724941	0.733221	1
ENSG00000172081		green	0.409346	0.0131714	MOB3A	4941.2	-0.00764746	0.165907	0.77938	-0.258281	0.0386698	0.509152	-0.0144387	0.921897	0.986252	-0.0220773	0.866716	0.988724	0.243858	0.109322	1	0.236217	0.0859317	1	0.00764134	0.961217	1
ENSG00000048740		green	0.407043	0.0137471	CELF2	8367.52	-0.209624	0.0333445	0.489379	-0.245618	0.0356335	0.499221	-0.195478	0.159298	0.647147	-0.339207	0.00596524	0.287037	0.0501427	0.727238	1	-0.0935949	0.468672	1	0.143738	0.333162	1
ENSG00000129691		green	-0.405677	0.0140986	ASH2L	1442.89	0.283372	0.112563	0.700793	0.423387	0.0201613	0.400423	0.23111	0.245967	0.727977	0.335334	0.074781	0.61808	-0.192304	0.345043	1	-0.0880626	0.649613	1	-0.104243	0.615342	1
ENSG00000198399		green	-0.404416	0.0144297	ITSN2	5862.04	0.155196	0.243464	0.852311	0.22455	0.0489606	0.533916	0.141802	0.296592	0.780277	0.0662574	0.582204	0.956349	-0.0827504	0.556281	1	-0.158301	0.209441	1	0.0755507	0.603263	1
ENSG00000084112		green	0.403192	0.0147574	SSH1	3071.06	-0.264594	0.173312	0.787253	-0.290108	0.0357796	0.500035	-0.226834	0.158028	0.645984	-0.0963335	0.5065	0.941665	0.0632744	0.702842	1	0.193789	0.200159	1	-0.130516	0.444694	1
ENSG00000115267		green	-0.402368	0.0149815	IFIH1	1146.85	0.904859	0.0259694		0.418975	0.0300025	0.472726	0.59737	0.00385002		0.306464	0.12214		0.178445	0.396659	1	-0.112529	0.579801	1	0.290979	0.173126	1
ENSG00000160767	Yes	green	0.40017	0.0155932	FAM189B	522.816	-2.02418	0.0501796		-0.352961	0.0974962		-0.520039	0.00867691		-0.36135	0.0841244		-0.167178	0.390138	1	-0.0083966	0.967437	1	-0.158789	0.404791	1
ENSG00000211450		green	-0.39889	0.0159589	C11orf31	2238.81	0.452009	0.106894	0.69074	0.231568	0.0979911	0.656487	0.377526	0.0200767	0.352327	0.181246	0.217016	0.814169	0.145978	0.383597	1	-0.0503259	0.742281	1	0.196306	0.255023	1
ENSG00000104903		green	-0.398006	0.0162158	LYL1	1232.23	0.647774	0.0512055		0.426363	0.0182719	0.387056	0.466749	0.018413		0.232731	0.212623		0.0404063	0.84187	1	-0.193659	0.314233	1	0.234069	0.256857	1
ENSG00000255302		green	-0.39763	0.0163262	EID1	5495.92	0.328564	0.0276476	0.442788	0.22764	0.0248748	0.436884	0.299976	0.014048	0.309678	0.0493081	0.646265	0.969526	0.0723439	0.567684	1	-0.178339	0.113574	1	0.250684	0.0557817	1
ENSG00000101557		green	0.397135	0.0164723	USP14	1070.46	-0.19004	0.0208432		-0.488037	0.00520464	0.233102	-0.182646	0.344843		-0.42595	0.0186072		0.305437	0.123249	1	0.0620917	0.739884	1	0.243348	0.229108	1
ENSG00000198258		green	-0.39645	0.0166763	UBL5	1763.8	0.710716	0.0104175	0.309762	0.363159	0.0209133	0.403548	0.559731	0.00172269	0.13766	0.233232	0.155153	0.75929	0.196607	0.284499	1	-0.12994	0.445524	1	0.326551	0.0830991	1
ENSG00000198752		green	0.394976	0.0171225	CDC42BPB	1623.44	-0.295596	0.113405	0.704426	-0.3896	0.0306425	0.476215	-0.218179	0.269722	0.751561	-0.00135697	0.994188	0.999531	0.171439	0.396673	1	0.388299	0.043201	1	-0.216863	0.292836	1
ENSG00000228532		green	0.391504	0.0182135	RP1-241P17.4	601.474	-0.746949	0.119014		-0.510329	0.0199291		-0.338795	0.10983		-0.196188	0.368586		0.171584	0.415267	1	0.314247	0.148407	1	-0.142667	0.494162	1
ENSG00000162654		green	-0.391276	0.0182872	GBP4	1567.9	0.5767	0.124371	0.728714	0.3835	0.0571149	0.562636	0.380512	0.0722465	0.538839	0.433876	0.0350516	0.491711	-0.00298102	0.988927	1	0.0503883	0.81043	1	-0.0533697	0.805793	1
ENSG00000171492		green	-0.388335	0.0192595	LRRC8D	1955	0.0512867	0.0631688	0.602573	0.334065	0.0715163	0.605584	0.0865017	0.667674	0.938775	0.457032	0.016791	0.421525	-0.247612	0.228891	1	0.122989	0.531643	1	-0.370607	0.0767561	1
ENSG00000204253		green	-0.388326	0.0192622	HNRNPCP2	2680.64	0.239059	0.168127	0.78407	0.143385	0.256078	0.820911	0.213061	0.151807	0.639162	0.284164	0.0325132	0.484988	0.0696825	0.650249	1	0.140789	0.310838	1	-0.0711069	0.653795	1
ENSG00000139132		green	0.38557	0.0202125	FGD4	1697.14	-0.870428	0.154144	0.768362	-0.138931	0.492634	0.906385	-0.468521	0.0272128	0.401905	-0.0768421	0.709982	0.973822	-0.329695	0.125489	1	0.0621024	0.768253	1	-0.391806	0.0714492	1
ENSG00000024862		green	-0.382949	0.0211517	CCDC28A	627.503	0.577551	0.146435		0.36954	0.0845969		0.338013	0.117974		0.474474	0.0282028		-0.0315296	0.884711	1	0.104963	0.630684	1	-0.136495	0.530857	1
ENSG00000114770	Yes	green	-0.378965	0.022649	ABCC5	1232.15	0.202803	0.13665		0.252062	0.12239	0.68735	0.178556	0.331415		0.385889	0.0230898		-0.073515	0.697108	1	0.133845	0.4471	1	-0.207362	0.283735	1
ENSG00000262919		green	-0.376041	0.0238029	FAM58A	642.411	0.739119	0.214832		0.205073	0.309142		0.441943	0.0368415		0.170484	0.407673		0.236933	0.270063	1	-0.0345956	0.869214	1	0.271534	0.211018	1
ENSG00000129480		green	-0.375144	0.0241665	DTD2	473.556	0.623233	0.164068		0.431573	0.0488041		0.297282	0.157696		0.430708	0.0477283		-0.13433	0.519979	1	-0.000861432	0.996823	1	-0.133472	0.518064	1
ENSG00000133816		green	0.370077	0.0263074	MICAL2	3168.46	-0.280978	0.111508	0.700793	-0.328819	0.0330557	0.489284	-0.241149	0.170439	0.658573	-0.314946	0.0506146	0.553377	0.0876766	0.628295	1	0.0138723	0.933973	1	0.0738049	0.691322	1
ENSG00000205531		green	-0.370026	0.02633	NAP1L4	2425.6	0.635201	0.0234432	0.421654	0.178444	0.226918	0.79136	0.509866	0.00267206	0.165794	0.163435	0.290326	0.865299	0.331466	0.0581616	1	-0.015011	0.925649	1	0.34648	0.0540204	1
ENSG00000267317		green	-0.364847	0.0286792	CTB-25B13.12	58.8408	3.11425	0.0833143		0.247658	0.0467313		0.146612	0.171248		0.149014	0.209071		-0.101098	0.320384	1	-0.0986942	0.380811	1	-0.00240442	0.980199	1
ENSG00000225972		green	-0.364211	0.0289792	MTND1P23	32.0926	2.15105	0.0452582		0.22514	0.150021		0.21689	0.11206		0.387624	0.00972695		-0.00825593	0.949575	1	0.16256	0.256955	1	-0.170822	0.172018	1
ENSG00000231245		green	0.363681	0.0292316	C1DP1	317.427	-1.03561	0.191668		-0.340097	0.0897359		-0.306986	0.0913704		-0.397581	0.0415155		0.0331189	0.851442	1	-0.0575164	0.761905	1	0.0906384	0.597883	1
ENSG00000185883		green	0.36171	0.0301844	ATP6V0C	781.029	-0.666314	0.0754831		-0.341644	0.07298		-0.456591	0.0259732		-0.411377	0.0357773		-0.114982	0.582409	1	-0.0697475	0.728809	1	-0.0452364	0.831323	1
ENSG00000135365		green	0.360313	0.0308752	PHF21A	2350.66	-0.425636	0.114042	0.705169	-0.273872	0.0874565	0.629533	-0.342128	0.0591393	0.511444	-0.339301	0.0422129	0.527391	-0.0682708	0.714189	1	-0.0654372	0.705746	1	-0.00283407	0.988166	1
ENSG00000116918		green	-0.358992	0.0315402	TSNAX	1190.83	0.915785	0.0175171		0.309748	0.0961813	0.653453	0.619204	0.00217755		0.192437	0.315972		0.309525	0.133526	1	-0.11733	0.552161	1	0.426862	0.0419643	1
ENSG00000182325		green	0.354548	0.0338643	FBXL6	807.211	-0.646745	0.0772351		-0.218078	0.298981		-0.384528	0.0741098		-0.535541	0.0118982		-0.166501	0.443694	1	-0.317547	0.141479	1	0.151048	0.489458	1
ENSG00000031698		green	-0.354474	0.0339042	SARS	3320.22	0.135733	0.172182	0.787253	0.171366	0.21352	0.78378	0.126639	0.429411	0.8562	0.317595	0.0280566	0.46674	-0.0447316	0.786838	1	0.146242	0.332174	1	-0.190975	0.26219	1
ENSG00000100426		green	0.353016	0.0346973	ZBED4	1518.98	-0.0667797	0.173093	0.787253	-0.35695	0.0399507	0.514903	-0.0671631	0.727343	0.953107	-0.0168864	0.9253	0.992891	0.289827	0.14217	1	0.340109	0.0676606	1	-0.0502818	0.803094	1
ENSG00000164300	Yes	green	0.350678	0.0360009	SERINC5	1642.77	-0.730928	0.125219	0.731046	-0.305583	0.109923	0.67414	-0.467972	0.0227453	0.367455	-0.158433	0.420066	0.917971	-0.162443	0.438018	1	0.147175	0.465501	1	-0.309624	0.145417	1
ENSG00000144744		green	-0.349465	0.0366922	UBA3	1907.48	0.62348	0.130148	0.741181	0.105946	0.554688	0.911605	0.437403	0.0263942	0.396356	0.251946	0.174287	0.77564	0.331519	0.100087	1	0.146021	0.445144	1	0.1855	0.36682	1
ENSG00000116266		green	-0.34859	0.0371978	STXBP3	1529.49	0.510545	0.100809	0.690409	0.362431	0.0322041	0.487173	0.388913	0.039553	0.448101	0.19056	0.278299	0.859368	0.0264972	0.891278	1	-0.171891	0.344552	1	0.198391	0.316981	1
ENSG00000144028		green	0.344214	0.0398124	SNRNP200	9243.29	-0.148561	0.00996061	0.30872	-0.287846	0.000766112	0.0968365	-0.143513	0.168209	0.658333	-0.148617	0.101667	0.682097	0.144336	0.181845	1	0.139232	0.14469	1	0.00510399	0.96368	1
ENSG00000169826		green	0.343093	0.0405056	CSGALNACT2	4413.84	-0.404132	0.238617	0.852311	-0.162918	0.247463	0.81169	-0.3315	0.0423703	0.461331	-0.103857	0.482056	0.936691	-0.168606	0.317006	1	0.0590664	0.701315	1	-0.227675	0.189205	1
ENSG00000275344		green	0.342755	0.0407164	MIR6503	52.0172	-0.223761	0.00228953		-0.0382267	0.742505		-0.0423472	0.67149		-0.13832	0.211519		-0.00412305	0.965258	1	-0.100151	0.339834	1	0.0960325	0.286088	1
ENSG00000105220		green	0.341413	0.0415628	GPI	4573.6	-0.0337038	0.245451	0.852311	-0.217943	0.0489986	0.533916	-0.036931	0.78005	0.964726	-0.111985	0.33837	0.888618	0.181022	0.186334	1	0.105962	0.387398	1	0.0750604	0.596133	1
ENSG00000129128		green	0.340459	0.0421726	SPCS3	4723.1	-0.162489	0.182166	0.802598	-0.146872	0.207582	0.779204	-0.150568	0.277054	0.759225	-0.265966	0.0305954	0.484576	-0.00369624	0.979434	1	-0.119101	0.355088	1	0.115405	0.435995	1
ENSG00000132604		green	-0.337994	0.0437824	TERF2	823.37	0.91227	0.0510995		0.40153	0.0530242		0.541628	0.0115483		0.469911	0.0258917		0.140143	0.518137	1	0.0683984	0.749666	1	0.0717463	0.742527	1
ENSG00000100239		green	-0.337613	0.0440361	PPP6R2	3371.46	0.426576	0.0959133	0.683725	0.226756	0.0936878	0.645153	0.35861	0.0230376	0.369016	0.0868972	0.540878	0.949333	0.131872	0.418251	1	-0.139869	0.34554	1	0.271744	0.105443	1
ENSG00000184470		green	0.33643	0.0448297	TXNRD2	798.38	-0.738813	0.053101		-0.443095	0.0258347		-0.451392	0.0317316		-0.0916122	0.652391		-0.00832167	0.968921	1	0.351551	0.0908939	1	-0.35988	0.09588	1
ENSG00000179981		green	0.33603	0.0451003	TSHZ1	1641.91	-1.1538	0.0103113	0.30872	-0.341389	0.082557	0.624438	-0.671791	0.0013016	0.125305	-0.115555	0.566262	0.952099	-0.330516	0.119866	1	0.225876	0.273331	1	-0.556404	0.00974317	1
ENSG00000151502		green	0.335619	0.0453802	VPS26B	1955.48	-0.697515	0.203175	0.818355	-0.0985115	0.604622	0.922227	-0.424945	0.0380546	0.442906	-0.0568728	0.771314	0.973822	-0.326518	0.118066	1	0.0416468	0.835766	1	-0.368172	0.0827276	1
ENSG00000104763		green	0.334954	0.0458363	ASAH1	4505.18	0.10253	0.16179	0.775452	-0.227726	0.0768255	0.614604	0.0790614	0.600931	0.914563	0.0144299	0.915132	0.992643	0.306812	0.049552	1	0.242171	0.086987	1	0.0646409	0.688262	1
ENSG00000131748		green	-0.334056	0.0464573	STARD3	2267.91	0.416938	0.111869	0.700793	0.155709	0.233085	0.795687	0.356855	0.019727	0.347552	0.208224	0.129449	0.712751	0.201167	0.203338	1	0.0525186	0.714224	1	0.14865	0.361903	1
ENSG00000141522		green	0.331952	0.0479394	ARHGDIA	9241.07	-0.0488064	0.201735	0.818355	-0.00418337	0.964187	0.993665	-0.0477479	0.672223	0.938876	-0.197036	0.0460962	0.547407	-0.0435654	0.709778	1	-0.192859	0.06306	1	0.149294	0.218402	1
ENSG00000132383		green	-0.331159	0.0485073	RPA1	2180.51	-0.0615461	0.14767	0.755336	-0.0701625	0.650055	0.933364	-0.0368559	0.834378	0.970654	0.278343	0.0847187	0.644378	0.0333042	0.854362	1	0.348541	0.0377588	1	-0.31524	0.0904244	1
ENSG00000025796		green	0.328301	0.0506001	SEC63	2671.2	-0.309881	0.063884	0.604007	-0.396959	0.0134397	0.347173	-0.263059	0.147386	0.636704	-0.332572	0.0468801	0.551322	0.133912	0.473183	1	0.0643915	0.710741	1	0.0695214	0.716337	1
ENSG00000121851		green	0.327411	0.0512664	POLR3GL	797.304	0.380457	0.0945875		-0.225228	0.273562		0.160611	0.452253		-0.33485	0.109801		0.385936	0.0744439	1	-0.109654	0.606895	1	0.4956	0.0230845	1
ENSG00000186815	Yes	green	0.326162	0.0522138	TPCN1	6169.54	0.135525	0.226633	0.838112	-0.0544707	0.552408	0.909699	0.121607	0.273886	0.756101	-0.115316	0.235595	0.827283	0.176086	0.126735	1	-0.0608477	0.551343	1	0.236935	0.0473905	1
ENSG00000151117		green	0.325751	0.052528	TMEM86A	408	-0.867123	0.0982395		-0.495417	0.020916		-0.358028	0.0741954		-0.428784	0.0421963		0.137437	0.485849	1	0.0666555	0.748475	1	0.0707837	0.714516	1
ENSG00000137074		green	-0.324185	0.053741	APTX	527.039	-0.481229	0.177517		0.3653	0.0945191		-0.0623066	0.764975		0.105302	0.626668		-0.427763	0.0381842	1	-0.260076	0.225981	1	-0.167693	0.410383	1
ENSG00000244363		green	-0.323727	0.0540997	RPL7P23	33.0727	0.351619	0.194783		0.378316	0.0338099		0.113658	0.471315		0.120789	0.481981		-0.264776	0.0814974	1	-0.257639	0.119595	1	-0.00713756	0.961106	1
ENSG00000165813		green	-0.322022	0.0554526	CCDC186	981.324	-0.305296	0.182422		0.272273	0.14228	0.713657	-0.161392	0.42348		0.113588	0.552715		-0.433751	0.0351847	1	-0.158706	0.419998	1	-0.27505	0.189322	1
ENSG00000150316		green	0.320799	0.0564392	CWC15	1118.86	-0.711021	0.115918		-0.296268	0.11142	0.676353	-0.477329	0.0181369		-0.229548	0.231448		-0.181112	0.38004	1	0.0667305	0.735223	1	-0.247848	0.237643	1
ENSG00000171453		green	0.319102	0.0578319	POLR1C	735.127	-0.401579	0.235068		-0.0999098	0.63897		-0.236818	0.27302		-0.426368	0.0476225		-0.136947	0.529063	1	-0.326548	0.13361	1	0.189605	0.384872	1
ENSG00000132842		green	0.318623	0.0582301	AP3B1	2633.72	-0.537851	0.0383437	0.508968	-0.239231	0.0928272	0.64288	-0.435445	0.00822203	0.257298	-0.037728	0.800368	0.97747	-0.196246	0.248252	1	0.20152	0.194973	1	-0.39777	0.0229154	1
ENSG00000112033		green	-0.317438	0.0592238	PPARD	1028.63	0.148524	0.0739858		0.252571	0.208221	0.779697	0.144813	0.492951		0.520257	0.011177		-0.107787	0.615189	1	0.267739	0.200981	1	-0.375532	0.0832233	1
ENSG00000135486		green	0.317046	0.0595552	HNRNPA1	14816.8	-0.0489994	0.133866	0.745937	-0.117703	0.218263	0.78378	-0.0503583	0.663067	0.93582	-0.233658	0.0210994	0.459558	0.067348	0.574245	1	-0.11596	0.275715	1	0.183308	0.139895	1
ENSG00000007520		green	-0.316253	0.0602308	TSR3	1060.45	0.0716139	0.162347		0.321361	0.0597984	0.566889	0.0653402	0.731244		-0.0399479	0.821709		-0.256052	0.189378	1	-0.361354	0.0486968	1	0.105303	0.597557	1
ENSG00000163214		green	-0.314851	0.0614394	DHX57	751.344	-0.0796026	0.15214		0.142616	0.514596		-0.0531494	0.804172		-0.346985	0.112697		-0.195819	0.35997	1	-0.489758	0.0252939	1	0.293947	0.16693	1
ENSG00000166847		green	0.305543	0.06996	DCTN5	1616.06	-0.375193	0.0100978	0.30872	-0.10932	0.509056	0.90783	-0.30348	0.102579	0.590028	-0.564282	0.00105415	0.12414	-0.194186	0.309109	1	-0.45502	0.0107814	1	0.260837	0.182072	1
ENSG00000107863		green	0.304703	0.070772	ARHGAP21	1671.79	-0.24849	0.236226	0.851227	-0.355999	0.0454955	0.52812	-0.202263	0.30203	0.785349	-0.242996	0.187044	0.781531	0.153756	0.443508	1	0.113017	0.552057	1	0.0407393	0.842224	1
ENSG00000165792		green	-0.304557	0.0709143	METTL17	2071.38	0.732802	0.014213	0.343508	0.344959	0.0333759	0.489284	0.567141	0.00193089	0.146292	0.282111	0.0948065	0.667874	0.222223	0.237114	1	-0.0628543	0.719607	1	0.285081	0.138792	1
ENSG00000089693		green	0.303737	0.0717149	MLF2	3454.83	-0.397824	0.208226	0.829027	-0.0664672	0.618326	0.928714	-0.328473	0.0352097	0.436463	-0.0379653	0.786555	0.975834	-0.262036	0.103838	1	0.0285047	0.845592	1	-0.290543	0.0800987	1
ENSG00000074855		green	0.303732	0.0717197	ANO8	1006.28	-0.103438	0.101864		-0.457248	0.0170553	0.380576	-0.101028	0.623445		-0.0774728	0.694032		0.356285	0.0893949	1	0.379841	0.0601686	1	-0.0235559	0.911904	1
ENSG00000148358	Yes	green	0.298917	0.0765692	GPR107	2436.24	-0.586809	0.0496774	0.557466	-0.322855	0.0423373	0.525829	-0.452671	0.0120105	0.288352	-0.124106	0.454127	0.919945	-0.129848	0.483588	1	0.19877	0.248089	1	-0.328622	0.0837387	1
ENSG00000162664		green	0.298678	0.0768168	ZNF326	1210.69	-0.662214	0.0305349		-0.369745	0.0301431	0.47363	-0.499662	0.00856572		-0.362336	0.0406817		-0.12995	0.505127	1	0.0074079	0.967737	1	-0.137361	0.490751	1
ENSG00000104133		green	-0.298655	0.0768404	SPG11	3922.86	-0.123685	0.0854372	0.667624	0.169758	0.150402	0.718265	-0.0959507	0.493565	0.877938	0.223098	0.0731893	0.614488	-0.265729	0.0668901	1	0.0533446	0.682316	1	-0.319076	0.0331599	1
ENSG00000163125		green	-0.29449	0.0812502	RPRD2	2109.54	0.228269	0.157643	0.772168	0.373485	0.0264546	0.453638	0.19452	0.301266	0.784771	0.260399	0.136424	0.725919	-0.178985	0.354008	1	-0.113098	0.531997	1	-0.0658884	0.738725	1
ENSG00000166598		green	0.292529	0.0833929	HSP90B1	13696	-0.0220633	0.0218546	0.407257	-0.264011	0.00358263	0.201762	-0.0265128	0.809472	0.970654	-0.156451	0.103625	0.685997	0.237508	0.0373755	1	0.107563	0.286894	1	0.129945	0.271781	1
ENSG00000164307		green	-0.291084	0.085	ERAP1	3413.09	0.224703	0.0187975	0.378563	0.475795	0.00305225	0.190783	0.191369	0.291982	0.774982	0.0777173	0.642436	0.968848	-0.284453	0.127582	1	-0.398119	0.0218508	1	0.113667	0.552487	1
ENSG00000138185	Yes	green	-0.288532	0.0878952	ENTPD1	4140.83	0.0830024	0.186676	0.809838	0.116421	0.306375	0.848351	0.0810907	0.549886	0.903272	0.259673	0.0307044	0.484576	-0.0353334	0.801306	1	0.143259	0.255027	1	-0.178594	0.2184	1
ENSG00000004142		green	-0.288525	0.0879037	POLDIP2	2025.91	0.458707	0.00743848	0.265129	0.322515	0.0167805	0.37876	0.384711	0.0145047	0.313568	-0.0302778	0.830838	0.98438	0.062211	0.701818	1	-0.352819	0.0170358	1	0.415034	0.0131917	1
ENSG00000134697		green	-0.286009	0.0908328	GNL2	1706.4	-0.157669	0.0815824	0.660156	0.258339	0.105895	0.666481	-0.10994	0.543365	0.900058	-0.142997	0.390687	0.910807	-0.368324	0.0476694	1	-0.401379	0.0202169	1	0.0330548	0.862382	1
ENSG00000145337		green	0.285264	0.0917138	PYURF	2249.81	-0.501033	0.142011	0.750906	-0.184943	0.216755	0.78378	-0.39601	0.0211422	0.355681	-0.0961511	0.53921	0.949333	-0.211102	0.232932	1	0.0888003	0.585724	1	-0.299905	0.0990292	1
ENSG00000106991	Yes	green	-0.284961	0.0920742	ENG	1057.96	0.128826	0.214073		0.276047	0.166176	0.745795	0.126473	0.547936		0.403875	0.0476141		-0.149609	0.484124	1	0.127855	0.539436	1	-0.277469	0.199611	1
ENSG00000106400		green	0.280766	0.0971765	ZNHIT1	1637.94	0.0837346	0.0880095	0.668455	-0.0242011	0.893974	0.984306	0.0274017	0.890317	0.97666	-0.420694	0.0249405	0.46674	0.05162	0.799483	1	-0.396558	0.0402304	1	0.448185	0.0304353	1
ENSG00000121390		green	-0.279048	0.0993269	PSPC1	1461.07	0.360652	0.157858	0.772168	0.301633	0.0905996	0.638207	0.281142	0.151828	0.639162	0.390132	0.0343831	0.490358	-0.0204908	0.918724	1	0.0885134	0.641723	1	-0.109005	0.594582	1
ENSG00000109685		green	0.273713	0.106238	WHSC1	1962.59	-0.353981	0.173557	0.787316	-0.310059	0.048073	0.533003	-0.289556	0.104313	0.591912	-0.238869	0.144427	0.740091	0.0204982	0.911024	1	0.0711955	0.675339	1	-0.050698	0.787585	1
ENSG00000130313		green	0.272627	0.107688	PGLS	3029.14	0.0982101	0.130214	0.741181	-0.140744	0.320785	0.854132	0.0624606	0.703556	0.945385	-0.295133	0.0470978	0.551322	0.203229	0.230091	1	-0.154404	0.318946	1	0.357636	0.0401418	1
ENSG00000166233		green	-0.267343	0.114958	ARIH1	2046.73	0.2343	0.140802	0.750906	0.0283056	0.855668	0.976925	0.192577	0.276944	0.759225	0.339514	0.0365831	0.500352	0.16429	0.367443	1	0.311241	0.0650777	1	-0.146952	0.432005	1
ENSG00000219507		green	0.267067	0.115348	FTH1P8	298.079	-0.166668	0.0832148		-0.343982	0.110603		-0.0846282	0.695473		0.216252	0.319239		0.259422	0.232132	1	0.560384	0.0104584	1	-0.300968	0.165735	1
ENSG00000008056		green	0.263702	0.120178	SYN1	53.7958	-11.1768	0.0296323		-0.115565	0.298281		-0.123302	0.195237		-0.0667682	0.527405		-0.00774237	0.931572	1	0.0488242	0.625523	1	-0.0565691	0.50919	1
ENSG00000006530		green	-0.261426	0.123531	AGK	687.404	1.11564	0.0184182		0.363424	0.0775019		0.643843	0.00259432		0.183232	0.381867		0.280499	0.194874	1	-0.180232	0.39793	1	0.46074	0.0346873	1
ENSG00000112159		green	-0.25893	0.127287	MDN1	2601.37	-0.0290964	0.0501166	0.558013	0.351714	0.0439536	0.525829	0.0259178	0.893352	0.97666	0.401895	0.0263296	0.46674	-0.325852	0.0999801	1	0.0501912	0.788259	1	-0.376048	0.0630068	1
ENSG00000250859		green	0.256589	0.130885	HNRNPKP1	24.6185	-0.495906	0.080919		-0.171998	0.320389		-0.14926	0.328213		-0.348657	0.0363018		0.0227467	0.876744	1	-0.176761	0.26934	1	0.199516	0.157088	1
ENSG00000055208		green	0.256177	0.131527	TAB2	5425.38	-0.0976602	0.244744	0.852311	-0.164409	0.247406	0.81169	-0.0783222	0.63403	0.92801	0.142052	0.340402	0.889771	0.0860907	0.611969	1	0.306487	0.0484059	1	-0.220398	0.206869	1
ENSG00000143614		green	0.254856	0.133598	GATAD2B	2350.06	-0.244237	0.143917	0.750906	-0.341469	0.0231831	0.425078	-0.211265	0.220289	0.704641	-0.21503	0.171523	0.77564	0.130214	0.463362	1	0.12645	0.439578	1	0.00376395	0.983536	1
ENSG00000065882		green	-0.250766	0.140163	TBC1D1	3845.83	0.0417082	0.00102497	0.097271	0.281794	0.00906909	0.294771	0.0387644	0.764422	0.963067	-0.190557	0.0952927	0.668393	-0.24304	0.0696749	1	-0.472373	7.96149e-05	0.834815	0.229335	0.0980648	1
ENSG00000267185		green	0.24771	0.145222	PTP4A2P1	39.9757	-0.423732	0.0969085		-0.399856	0.0491446		-0.140815	0.447131		0.0181545	0.927041		0.259162	0.150708	1	0.418199	0.0304243	1	-0.159042	0.36522	1
ENSG00000143621		green	-0.246837	0.14669	ILF2	4183.19	0.0258203	0.267952	0.866332	0.145018	0.267582	0.82781	0.021513	0.888415	0.97666	-0.139824	0.309515	0.87442	-0.123512	0.435579	1	-0.284862	0.0474329	1	0.161351	0.323231	1
ENSG00000080822	Yes	green	-0.245816	0.148422	CLDND1	1366.81	0.499411	0.21095	0.83062	0.11312	0.48411	0.906021	0.379189	0.0377222	0.442906	0.145952	0.386105	0.907155	0.266111	0.155975	1	0.032835	0.850862	1	0.233279	0.224821	1
ENSG00000106868	Yes	green	0.245123	0.149607	SUSD1	1173.47	-0.00222684	0.150074		-0.393032	0.0341982	0.490666	-0.03048	0.879828		-0.0488417	0.798492		0.362615	0.0782846	1	0.344245	0.0803219	1	0.0183706	0.930134	1
ENSG00000144560		green	0.244628	0.150456	VGLL4	961.266	-0.321156	0.100866		-0.354357	0.0547546	0.551107	-0.257424	0.199908		-0.4327	0.0229922		0.096946	0.636652	1	-0.0783603	0.689165	1	0.175309	0.40136	1
ENSG00000103502		green	-0.242427	0.154279	CDIPT	1572.29	-0.31043	0.0271942	0.442788	0.0819625	0.661353	0.934252	-0.151075	0.456102	0.862256	0.437871	0.0230943	0.46674	-0.2331	0.25999	1	0.355966	0.0724202	1	-0.589075	0.00511982	1
ENSG00000260997		green	0.23462	0.168404	RP4-647J21.1	488.248	0.487346	0.141203		-0.159122	0.467707		0.122344	0.561657		-0.339814	0.118582		0.281565	0.178449	1	-0.180767	0.404055	1	0.462345	0.0255445	1
ENSG00000166710		green	-0.232678	0.172057	B2M	99109.8	0.159256	0.099867	0.690409	0.0250036	0.654337	0.933736	0.154971	0.0248353	0.381733	0.0909063	0.126532	0.708656	0.129969	0.0702738	1	0.0659034	0.293195	1	0.0640661	0.390542	1
ENSG00000232389		green	-0.229494	0.178168	RP11-134K13.2	13.938	0.529849	0.0402095		0.332699	0.0366865		0.136778	0.325315		0.338797	0.026528		-0.196023	0.141107	1	0.00610075	0.966735	1	-0.202132	0.11337	1
ENSG00000167323	Yes	green	-0.228986	0.179157	STIM1	2753.05	0.241845	0.0599018	0.591979	-0.0885841	0.573103	0.917108	0.163007	0.361281	0.820722	-0.328645	0.0451301	0.547309	0.251629	0.170761	1	-0.24009	0.158685	1	0.491724	0.00906911	1
ENSG00000072786		green	0.226695	0.183665	STK10	9415.92	-0.258759	0.0710339	0.630745	-0.0733226	0.459926	0.898768	-0.238772	0.0459985	0.468891	-0.237724	0.0236923	0.46674	-0.165458	0.182318	1	-0.164407	0.136073	1	-0.00105107	0.993472	1
ENSG00000198624		green	0.225476	0.186097	CCDC69	5941.06	-0.293051	0.103021	0.69074	-0.190686	0.0991597	0.658378	-0.264389	0.0546193	0.503962	-0.251199	0.0396024	0.514246	-0.0737104	0.604737	1	-0.0605169	0.635919	1	-0.0131937	0.928559	1
ENSG00000099785		green	0.221967	0.193224	37316	1023.84	-0.127701	0.175327		-0.452128	0.0356329	0.499221	-0.11074	0.60855		-0.0807838	0.709499		0.341484	0.115978	1	0.371445	0.0894605	1	-0.0299617	0.890374	1
ENSG00000237550		green	-0.221303	0.194594	UBE2Q2P6	17642.1	0.36343	0.0723726	0.631225	-0.0233748	0.852992	0.976608	0.302965	0.0413865	0.456546	-0.0781797	0.556123	0.952099	0.32637	0.0335686	1	-0.0548097	0.693017	1	0.381183	0.0161395	1
ENSG00000173674		green	-0.22098	0.195263	EIF1AX	1676.33	0.300581	0.174514	0.788621	0.277205	0.161937	0.741626	0.181724	0.38644	0.841927	-0.147436	0.467407	0.93028	-0.0954877	0.654341	1	-0.424724	0.0406225	1	0.329243	0.127251	1
ENSG00000179218		green	0.21809	0.201319	CALR	9051.85	-0.18969	0.127595	0.735876	-0.222236	0.0476126	0.533003	-0.176236	0.187981	0.679603	-0.234794	0.0475721	0.551322	0.0460016	0.74	1	-0.0125597	0.919433	1	0.0585615	0.6828	1
ENSG00000226666		green	-0.215869	0.206059	HSPA9P1	10.7191	1.83395	0.159821		0.417711	0.00587843		0.185145	0.15986		0.0110453	0.939203		-0.232675	0.0649547	1	-0.406875	0.00332839	1	0.174208	0.147683	1
ENSG00000163527	Yes	green	0.215826	0.206153	STT3B	4565.28	-0.292031	0.0955571	0.683725	-0.150509	0.149883	0.717787	-0.262507	0.0365442	0.441988	0.0165201	0.881224	0.990212	-0.112008	0.389334	1	0.167036	0.149793	1	-0.279046	0.0381964	1
ENSG00000123737		green	0.207184	0.225343	EXOSC9	897.87	0.212679	0.209317		-0.352111	0.0880332		0.0771424	0.71846		-0.0670438	0.749504		0.429359	0.0474122	1	0.28513	0.181929	1	0.144232	0.508697	1
ENSG00000144043		green	-0.198791	0.245116	TEX261	1672.69	-0.27067	0.116567	0.709916	0.118417	0.526884	0.909108	-0.182999	0.366703	0.82371	-0.335166	0.0821589	0.6383	-0.301469	0.14521	1	-0.453658	0.022097	1	0.152191	0.46963	1
ENSG00000164941		green	-0.187711	0.272949	INTS8	1731.22	-0.47098	0.22786	0.838112	-0.08709	0.602224	0.922227	-0.331972	0.0761774	0.542825	0.0582717	0.737246	0.973822	-0.244931	0.202519	1	0.14538	0.418907	1	-0.390316	0.0471544	1
ENSG00000112081		green	0.181868	0.288426	SRSF3	11759.8	0.0194829	0.157283	0.772168	-0.197674	0.0444462	0.527187	0.0140052	0.906045	0.982469	-0.0071487	0.945285	0.994027	0.211689	0.0853456	1	0.190532	0.0814195	1	0.0211563	0.868113	1
ENSG00000101752		green	-0.18065	0.291722	MIB1	928.689	-0.561893	0.0269265		0.25087	0.203814		-0.311649	0.136649		-0.26158	0.195782		-0.562643	0.00822076	1	-0.512544	0.0132105	1	-0.050102	0.81624	1
ENSG00000154001		green	-0.170326	0.320627	PPP2R5E	1525.76	-0.529861	0.0936117	0.678951	0.199054	0.301558	0.846207	-0.272322	0.187161	0.678725	0.199947	0.312289	0.875545	-0.47149	0.0249857	1	0.000897252	0.996472	1	-0.472396	0.0268748	1
ENSG00000280325		green	-0.158661	0.355361	AC074183.3	3.43786	5.81826	7.699e-05		0.118829			0.425054			0.0435964			0.30638			-0.0752823			0.381678
ENSG00000168014		green	-0.157291	0.359582	C2CD3	732.947	1.1774	0.021133		0.18578	0.383075		0.598008	0.00564461		0.0381853	0.859211		0.412347	0.0580721	1	-0.147636	0.497671	1	0.559995	0.0102771	1
ENSG00000105609	Yes	green	0.153581	0.371169	LILRB5	22.7025	-6.18093	0.0159897		-0.17554	0.0900697		-0.136668	0.122697		-0.0795752	0.41865		0.0388946	0.642396	1	0.0960213	0.302104	1	-0.0571294	0.4726	1
ENSG00000090863		green	0.139586	0.416824	GLG1	6478.71	-0.247361	0.13556	0.748146	-0.0977598	0.27777	0.831158	-0.231121	0.034577	0.436463	-0.164596	0.0849571	0.644378	-0.133367	0.239881	1	-0.0668384	0.505577	1	-0.0665293	0.571626	1
ENSG00000240695		green	0.138404	0.420818	RP11-102M11.1	17.7181	-5.18646	0.0755245		-0.230681	0.123109		-0.258255	0.0470277		-0.173161	0.226544		-0.0275961	0.823934	1	0.0575506	0.673475	1	-0.0851508	0.472963	1
ENSG00000212710		green	0.124953	0.46777	CTAGE1	52.0275	-7.8769	0.0417719		-0.0459855	0.68582		-0.0453785	0.641533		0.106857	0.323058		0.000605675	0.994768	1	0.152924	0.135479	1	-0.152325	0.0828196	1
ENSG00000179021		green	0.124078	0.470918	C3orf38	1047.31	0.153461	0.104903		-0.0897452	0.644204	0.933364	0.0550124	0.7909		-0.424818	0.0331405		0.144795	0.493085	1	-0.335142	0.10096	1	0.479945	0.0250722	1
ENSG00000112983		green	-0.0827351	0.63143	BRD8	992.859	-0.9801	0.14909		-0.149759	0.478822	0.906009	-0.483584	0.0249878		-0.276827	0.196026		-0.33394	0.124767	1	-0.127099	0.557826	1	-0.206847	0.343697	1
ENSG00000188820		grey	-0.625996	4.43861e-05	FAM26F	1098.85	0.967947	0.0500915		0.313245	0.14054	0.708055	0.498678	0.0209495		-0.00111483	0.995862		0.185497	0.393922	1	-0.314441	0.148195	1	0.499949	0.0220091	1
ENSG00000231027		grey	-0.593262	0.000137082	AC079325.6	617.638	0.862171	0.160561		-0.00468472	0.982953		0.309191	0.14483		-0.154609	0.478704		0.313984	0.136445	1	-0.149981	0.490575	1	0.463978	0.0263647	1
ENSG00000106346		grey	0.585121	0.000178112	USP42	589.946	-1.42891	0.0528986		-0.0089358	0.967491		-0.378763	0.0743187		0.134005	0.53937		-0.37	0.0796171	1	0.142986	0.511313	1	-0.513002	0.014204	1
ENSG00000010244		grey	0.57249	0.00026379	ZNF207	6730.12	-0.182853	0.101918	0.69074	0.0484318	0.674648	0.937252	-0.151878	0.26861	0.749396	0.203925	0.0940145	0.667874	-0.200327	0.158648	1	0.155503	0.222682	1	-0.355831	0.0153848	1
ENSG00000186716		grey	0.555505	0.000436501	BCR	2017.46	-0.727101	0.0115385	0.314485	-0.327561	0.0718158	0.605584	-0.475606	0.0168413	0.331273	0.114426	0.542546	0.949333	-0.148098	0.466745	1	0.442054	0.022413	1	-0.590161	0.00441293	1
ENSG00000133106		grey	-0.55541	0.000437705	EPSTI1	1838.42	0.52905	0.106716	0.69074	0.0355633	0.830558	0.974868	0.380878	0.0410025	0.455996	-0.0471861	0.784841	0.975103	0.345371	0.0711449	1	-0.0827616	0.643844	1	0.428138	0.0288431	1
ENSG00000178952		grey	0.536928	0.000734836	TUFM	5525.4	-0.339153	0.0363006	0.496406	-0.0712063	0.47671	0.905233	-0.305034	0.0114505	0.288352	0.0589179	0.578116	0.954296	-0.233843	0.0615066	1	0.13013	0.24184	1	-0.363974	0.00493305	1
ENSG00000264364		grey	0.529006	0.000909413	DYNLL2	2440.35	-0.517619	0.105288	0.69074	0.0205729	0.894695	0.984337	-0.382674	0.0306319	0.423127	0.0322105	0.842642	0.985586	-0.403309	0.0268346	1	0.0116405	0.944942	1	-0.414954	0.0264232	1
ENSG00000169139		grey	-0.505634	0.00165631	UBE2V2	1009.98	0.462183	0.00231173		0.297488	0.112827	0.679835	0.286774	0.157863		-0.387973	0.0447387		-0.0106967	0.958836	1	-0.685582	0.000558256	1	0.674896	0.00136379	1
ENSG00000090905		grey	0.498086	0.00199236	TNRC6A	1909.07	-0.253017	0.0535803	0.575667	-0.214108	0.12077	0.686099	-0.20575	0.199901	0.689937	0.152694	0.2916	0.86607	0.0083501	0.959809	1	0.366831	0.0151563	1	-0.358484	0.0355867	1
ENSG00000204681	Yes	grey	0.497694	0.00201132	GABBR1	6147.1	-0.343239	0.151627	0.765498	0.0434744	0.72359	0.9548	-0.291019	0.0451199	0.46783	-0.0703882	0.586872	0.958107	-0.334522	0.0259619	1	-0.113869	0.40065	1	-0.220655	0.154765	1
ENSG00000100299		grey	0.494903	0.00215107	ARSA	2116.04	-0.798232	0.0121612	0.315698	-0.0914306	0.574986	0.917108	-0.590757	0.00130707	0.125305	-0.28693	0.0910345	0.658596	-0.49941	0.00818033	1	-0.195521	0.266659	1	-0.303894	0.116177	1
ENSG00000070367		grey	0.491814	0.00231559	EXOC5	1845.7	-0.627717	0.00317591	0.180813	0.29791	0.0854955	0.625329	-0.383936	0.0458624	0.468891	0.252777	0.159382	0.765296	-0.681973	0.000539844	1	-0.0451333	0.807901	1	-0.63685	0.00156014	1
ENSG00000183486		grey	-0.486646	0.00261547	MX2	3341.98	0.567958	0.04202	0.513307	0.0352479	0.814399	0.972088	0.443535	0.0099576	0.282266	0.0526449	0.737422	0.973822	0.40834	0.0212619	1	0.0173972	0.915175	1	0.390947	0.0318247	1
ENSG00000198646		grey	0.465842	0.00419218	NCOA6	2416.05	-0.340911	0.102283	0.69074	0.215863	0.178427	0.755027	-0.230074	0.204846	0.692903	0.130424	0.435326	0.917971	-0.446004	0.0168151	1	-0.0854463	0.622249	1	-0.360562	0.0593346	1
ENSG00000244462		grey	-0.464322	0.00433432	RBM12	2435.31	0.17308	0.214955	0.832565	-0.0946825	0.500668	0.906385	0.127621	0.433687	0.856465	-0.21574	0.143514	0.739301	0.222329	0.186234	1	-0.121069	0.431009	1	0.343401	0.0473115	1
ENSG00000107796		grey	0.453656	0.00545428	ACTA2	131.778	-5.94768	0.0197989		0.0549467	0.716819		-0.101098	0.443284		0.0422875	0.770599		-0.156132	0.215032	1	-0.0126651	0.927132	1	-0.143473	0.233767	1
ENSG00000104129		grey	-0.45252	0.00558713	DNAJC17	481.435	0.592431	0.145006		-0.03702	0.865913		0.190883	0.369593		-0.297631	0.173112		0.227983	0.28159	1	-0.260708	0.231762	1	0.488705	0.0199463	1
ENSG00000240489		grey	-0.451663	0.00568916	SETP14	382.08	0.61429	0.102036		-0.108089	0.60016		0.307093	0.151072		-0.198077	0.345171		0.415287	0.0550892	1	-0.0900143	0.67328	1	0.505312	0.0205812	1
ENSG00000164022		grey	0.440546	0.00716518	AIMP1	1680.83	-0.627385	0.107244	0.69074	-0.0268237	0.873651	0.9813	-0.437661	0.0202752	0.352369	-0.0290437	0.868362	0.989002	-0.410914	0.0336984	1	-0.00221857	0.99024	1	-0.408702	0.0389035	1
ENSG00000173818		grey	-0.433232	0.00830572	ENDOV	576.427	0.702536	0.0718641		0.329592	0.0812643		0.46591	0.0224018		0.0761612	0.695516		0.136358	0.512358	1	-0.253474	0.204674	1	0.389838	0.0653313	1
ENSG00000110852		grey	0.427876	0.00923644	CLEC2B	1049.49	-1.1021	0.0813282		-0.104833	0.615843	0.928416	-0.535045	0.0128114		-0.163556	0.440589		-0.430358	0.0475355	1	-0.0587352	0.785008	1	-0.371633	0.0889939	1
ENSG00000136147		grey	-0.427853	0.00924049	PHF11	1580.16	0.423409	0.077114	0.646677	0.02954	0.878147	0.9813	0.239081	0.246795	0.729228	-0.313478	0.113185	0.691776	0.209594	0.318976	1	-0.343086	0.0909161	1	0.552689	0.00960951	1
ENSG00000136895		grey	0.405485	0.0141485	GARNL3	70.7949	-8.44429	0.0280792		-0.044797	0.696969		-0.0446262	0.651108		0.113853	0.29822		0.000169055	0.998558	1	0.158735	0.125866	1	-0.158572	0.0746123	1
ENSG00000149182		grey	-0.403127	0.0147749	ARFGAP2	3961.34	0.477909	0.0138142	0.339307	0.23749	0.0668489	0.597939	0.40445	0.00781752	0.251119	-0.0181237	0.894255	0.991078	0.166982	0.287905	1	-0.255632	0.0726724	1	0.422616	0.00910636	1
ENSG00000232380		grey	0.398878	0.0159625	ZDHHC20P4	51.0298	-2.9474	0.0326563		0.128725	0.336445		0.0414071	0.720289		0.274038	0.0319895		-0.0873708	0.427004	1	0.145384	0.231574	1	-0.232764	0.0264997	1
ENSG00000110429		grey	0.39357	0.0175576	FBXO3	939.256	-1.03136	0.129171		-0.0697396	0.740869		-0.477588	0.0267349		-0.115494	0.588791		-0.407989	0.0606668	1	-0.0457641	0.832605	1	-0.362235	0.0973507	1
ENSG00000214185		grey	-0.388456	0.0192186	XPOTP1	11.7624	3.67392	0.00353981		0.0143844			0.458536			0.0394851			0.444372			0.0251131			0.419275
ENSG00000137944		grey	-0.383647	0.0208982	CCBL2	907.54	0.840706	0.189211		0.157939	0.456204		0.430891	0.0459161		0.0499602	0.815822		0.273033	0.209517	1	-0.108008	0.618909	1	0.38105	0.0810269	1
ENSG00000231989		grey	0.379135	0.0225833	PPP1R2P3	71.3593	0.5595	0.0424215		0.227301	0.103974		0.106575	0.378504		0.310517	0.0200475		-0.120794	0.29462	1	0.0832555	0.512635	1	-0.204058	0.0636688	1
ENSG00000117602		grey	-0.378267	0.0229198	RCAN3	1442.89	0.606221	0.0362271	0.496406	0.142402	0.364436	0.867327	0.475626	0.0076604	0.251119	0.318932	0.0515256	0.553928	0.333271	0.0693317	1	0.176549	0.299256	1	0.156724	0.404994	1
ENSG00000213862		grey	-0.377577	0.0231907	CTD-2270N23.1	492.146	0.834111	0.0514657		0.063202	0.771795		0.340667	0.113846		-0.257191	0.239142		0.277556	0.197882	1	-0.3205	0.143903	1	0.598072	0.00537002	1
ENSG00000172115		grey	-0.376929	0.0234475	CYCS	2442.91	0.567495	0.0353645	0.496406	0.168665	0.259248	0.821826	0.447501	0.00907028	0.268805	0.00604286	0.969179	0.996192	0.278876	0.114468	1	-0.162638	0.317482	1	0.441519	0.0150127	1
ENSG00000180354		grey	0.372639	0.0252063	MTURN	816.367	-0.468445	0.188374		0.161392	0.432837		-0.190808	0.371949		0.251026	0.230703		-0.352304	0.103459	1	0.0896553	0.674021	1	-0.441969	0.0427491	1
ENSG00000172466		grey	0.359782	0.0311412	ZNF24	3235.91	-0.302202	0.166241	0.779912	-0.287641	0.0403028	0.516258	-0.255664	0.116136	0.601685	-0.0997615	0.497706	0.939364	0.0319732	0.848986	1	0.187894	0.220604	1	-0.155922	0.366929	1
ENSG00000136152		grey	-0.355689	0.033255	COG3	1282.82	0.537143	0.0443206		-0.310609	0.11715	0.682585	0.29269	0.163031		0.0138303	0.94565		0.603432	0.00466573	1	0.324501	0.117796	1	0.278936	0.196346	1
ENSG00000145216		grey	-0.345673	0.0389248	FIP1L1	1356.69	0.521219	0.209255	0.83062	-0.038947	0.846254	0.976608	0.280861	0.183765		-0.1628	0.427606		0.319886	0.135875	1	-0.123883	0.554354	1	0.443778	0.0407099	1
ENSG00000232888		grey	-0.340745	0.0419892	RPS11P5	987.453	0.182316	0.236245		-0.0585442	0.680768	0.940708	0.135263	0.411382		-0.212528	0.154399		0.193831	0.253828	1	-0.153999	0.322048	1	0.347833	0.0466144	1
ENSG00000100461		grey	0.337957	0.0438072	RBM23	3155.34	-0.266896	0.00262867	0.173608	-0.0564535	0.641444	0.933364	-0.219669	0.125822	0.613869	0.313847	0.0140199	0.388138	-0.163235	0.271507	1	0.370323	0.00559583	1	-0.533561	0.000497779	1
ENSG00000124802		grey	-0.335641	0.0453653	EEF1E1	260.308	1.5375	0.216407		0.138603	0.497448		0.389369	0.0367863		0.253947	0.202486		0.250872	0.16759	1	0.115391	0.552862	1	0.135485	0.444073	1
ENSG00000115286		grey	-0.330451	0.0490191	NDUFS7	2049.42	0.159851	0.065535	0.614909	0.233871	0.168015	0.746097	0.111629	0.55541	0.907103	-0.245428	0.163671	0.769854	-0.122249	0.529061	1	-0.479361	0.00855004	1	0.357116	0.0721802	1
ENSG00000275882		grey	0.329998	0.0493491	IKBKGP1	6.08514	-2.6585	0.0746464		-0.153652	0.443045		-0.388679	0.0312789		-0.271414	0.163064		-0.235155	0.179648	1	-0.117816	0.533243	1	-0.117344	0.489957	1
ENSG00000127054		grey	-0.326358	0.0520639	CPSF3L	2877.54	-0.0379328	0.102274	0.69074	0.0742814	0.554034	0.911265	-0.0372965	0.800978	0.968857	-0.260741	0.0486505	0.552273	-0.111583	0.465724	1	-0.335044	0.0153684	1	0.223462	0.156934	1
ENSG00000164880		grey	0.325041	0.0530756	INTS1	5363.53	-0.289463	0.158394	0.772168	-0.0919683	0.484229	0.906021	-0.25059	0.103697	0.591912	-0.282178	0.0412546	0.524472	-0.158637	0.318747	1	-0.190223	0.187687	1	0.0315864	0.847297	1
ENSG00000174839		grey	0.317665	0.059032	DENND6A	1110.26	-0.287521	0.11473		-0.192497	0.302039	0.846622	-0.174957	0.387086		0.235659	0.220077		0.0175292	0.932371	1	0.428225	0.0302536	1	-0.410702	0.050585	1
ENSG00000130227		grey	0.295713	0.0799357	XPO7	2362.73	-0.382866	0.267397	0.866332	0.0740905	0.633575	0.933364	-0.284566	0.107913	0.593019	-0.0501857	0.757113	0.973822	-0.358707	0.0489326	1	-0.124287	0.460926	1	-0.234423	0.209799	1
ENSG00000188612		grey	0.292585	0.0833308	SUMO2	3130.41	-0.248014	0.165625	0.778872	-0.0764731	0.61694	0.928677	-0.18178	0.298004	0.782186	0.2051	0.199114	0.796359	-0.105329	0.558109	1	0.281602	0.0898932	1	-0.386934	0.0361077	1
ENSG00000128923		grey	0.278327	0.100241	FAM63B	561.506	-0.857712	0.163345		0.201577	0.356011		-0.224165	0.281579		-0.165426	0.444482		-0.425904	0.0387632	1	-0.367125	0.0871363	1	-0.0587821	0.772559	1
ENSG00000100387		grey	0.276969	0.101979	RBX1	1213.29	-0.56814	0.179458		-0.0513751	0.779072	0.964807	-0.353872	0.0766587		0.0961741	0.610911		-0.30257	0.138645	1	0.147573	0.448395	1	-0.45015	0.0304971	1
ENSG00000113558		grey	-0.266254	0.116502	SKP1	3671.71	0.394325	0.0531408	0.574488	0.0210761	0.884597	0.982118	0.323531	0.0533422	0.499385	0.323842	0.0332076	0.487556	0.302488	0.0797579	1	0.302792	0.0558768	1	-0.000303839	0.998634	1
ENSG00000180389		grey	0.255292	0.132911	ATP5EP2	3.43083	-1.7203	0.138434		0.235712	0.127141		-0.0376771	0.778538		-0.039045	0.791231		-0.273527	0.0330805	1	-0.274892	0.0517279	1	0.0013652	0.991105	1
ENSG00000132005		grey	0.249848	0.141669	RFX1	897.674	-0.716318	0.0134851		-0.121672	0.529343		-0.472518	0.0224152		-0.576615	0.00369451		-0.350925	0.0959381	1	-0.45503	0.0254276	1	0.104106	0.626374	1
ENSG00000155508		grey	-0.248131	0.144517	CNOT8	4070.97	0.00266762	0.159729	0.772168	0.125748	0.301133	0.846207	0.000782739	0.995659	0.998911	-0.180599	0.158981	0.764991	-0.124971	0.401046	1	-0.306365	0.0223607	1	0.181395	0.237834	1
ENSG00000127616		grey	0.230097	0.176998	SMARCA4	3648.84	-0.328449	0.1581	0.772168	0.0967189	0.496836	0.906385	-0.250983	0.127675	0.613869	0.116646	0.43438	0.917971	-0.347744	0.040731	1	0.0199309	0.898003	1	-0.367678	0.0354755	1
ENSG00000174721		grey	-0.22382	0.189436	FGFBP3	46.7878	-0.60584	0.0255154		0.0118111	0.909746		-0.0348788	0.695449		-0.0937849	0.343402		-0.0467154	0.5795	1	-0.105656	0.259158	1	0.0589425	0.461554	1
ENSG00000011451		grey	-0.220928	0.19537	WIZ	1069.64	0.533168	0.136015		0.172466	0.295686	0.841923	0.396007	0.0325957		0.0309997	0.856651		0.223581	0.240092	1	-0.141484	0.426153	1	0.36507	0.0610143	1
ENSG00000095787		grey	0.215233	0.207433	WAC	6526.54	-0.173408	0.0285654	0.447119	-0.312007	0.00303415	0.190783	-0.162134	0.199286	0.689937	-0.0828412	0.456782	0.922428	0.149878	0.252236	1	0.229175	0.0496829	1	-0.0792975	0.558206	1
ENSG00000223803		grey	-0.21321	0.211837	RPS20P14	312.572	0.494669	0.257769		0.400281	0.0483093		0.16253	0.378456		0.1269	0.520564		-0.237842	0.185742	1	-0.273487	0.155492	1	0.035646	0.838464	1
ENSG00000001084		grey	0.211831	0.214878	GCLC	2155.77	-0.398088	0.0313442	0.470791	0.130455	0.331012	0.857017	-0.32483	0.0383366	0.442906	-0.15305	0.277902	0.859368	-0.455329	0.00492931	1	-0.283524	0.0541075	1	-0.171806	0.303266	1
ENSG00000063245		grey	0.202663	0.235855	EPN1	2697.57	-0.32925	0.142586	0.750906	-0.183961	0.281707	0.832391	-0.227757	0.231441	0.712533	0.16709	0.346125	0.896358	-0.0438152	0.82242	1	0.351097	0.0556249	1	-0.394917	0.047801	1
ENSG00000233328		grey	-0.200152	0.241832	PFN1P1	267.51	-0.417508	0.00486927		-0.179117	0.413894		-0.261356	0.219759		-0.742201	0.000683248		-0.0822662	0.698029	1	-0.563303	0.00981991	1	0.481052	0.0221891	1
ENSG00000108963		grey	-0.188031	0.272117	DPH1	1135.92	0.00150898	0.118497		-0.032412	0.866277	0.979252	-0.0326679	0.87419		-0.436066	0.0274354		-0.000248518	0.999057	1	-0.403732	0.0464987	1	0.40349	0.0585958	1
ENSG00000243678		grey	0.182714	0.286149	NME1-NME2	2460.41	0.0892177	0.183479	0.805478	0.235381	0.107731	0.668639	0.0911448	0.588709	0.913042	0.303063	0.0479255	0.551328	-0.144252	0.406398	1	0.0676902	0.671276	1	-0.211944	0.235394	1
ENSG00000277998		grey	0.173938	0.310317	RP11-452N17.1	523.785	-0.578029	0.112291		-0.204529	0.336873		-0.244	0.218092		-0.490823	0.0189467		-0.0394917	0.839105	1	-0.286427	0.163661	1	0.246944	0.195003	1
ENSG00000011295		grey	-0.172268	0.315059	TTC19	1331.37	0.0561883	0.0219432		-0.213181	0.229951	0.795687	-0.00534051	0.978223		-0.528843	0.00401621		0.20788	0.299433	1	-0.315715	0.0960604	1	0.523603	0.0104194	1
ENSG00000119685		grey	0.169385	0.323348	TTLL5	660.256	-0.260775	0.175648		-0.467717	0.0284166		-0.179439	0.406375		-0.13071	0.544313		0.288352	0.185023	1	0.337094	0.121909	1	-0.0487427	0.823142	1
ENSG00000186577		grey	0.165491	0.334757	C6orf1	641.181	0.0876738	0.112421		0.114547	0.593043		0.10019	0.643087		0.487334	0.0242256		-0.0143694	0.947309	1	0.372879	0.0876962	1	-0.387256	0.075361	1
ENSG00000088038		grey	-0.153829	0.370386	CNOT3	1383.97	-0.0846939	0.0174285	0.366945	0.257694	0.0809786	0.624438	-0.0652244	0.701026	0.943899	-0.246129	0.111502	0.689368	-0.322948	0.0650497	1	-0.503869	0.00174121	1	0.180922	0.314783	1
ENSG00000125995		grey	-0.14516	0.398272	ROMO1	500.243	0.543448	0.203171		0.143295	0.493604		0.319273	0.137731		0.420466	0.0477223		0.176026	0.417825	1	0.277234	0.198341	1	-0.101209	0.643264	1
ENSG00000136527		grey	0.139892	0.415792	TRA2B	7140.29	-0.220336	0.0934299	0.678951	-0.269001	0.0249653	0.436931	-0.201951	0.1554	0.641878	-0.243924	0.0538652	0.560617	0.0670527	0.648467	1	0.0250784	0.849776	1	0.0419745	0.782277	1
ENSG00000105671		grey	0.138625	0.42007	DDX49	1607.85	-0.486694	0.106929	0.69074	-0.154955	0.377758	0.875934	-0.360783	0.0631932	0.517543	-0.40427	0.0263317	0.46674	-0.205866	0.300767	1	-0.249352	0.184585	1	0.0434859	0.830453	1
ENSG00000171100		grey	0.135931	0.429245	MTM1	1277.54	-0.607636	0.0569439		0.163187	0.413666	0.891049	-0.339231	0.107287		-0.288152	0.158103		-0.502536	0.0188322	1	-0.451426	0.0304403	1	-0.0511123	0.813314	1
ENSG00000260174		grey	0.135008	0.432415	CTD-2022H16.3	10.9491	-1.11195	0.406233		0.395171	0.0491446		0.101793	0.574991		0.0574249	0.768344		-0.293494	0.0974356	1	-0.33788	0.075824	1	0.0443872	0.795893	1
ENSG00000236439		grey	0.124148	0.470664	RP11-175B9.3	54.5113	-0.99515	0.0513472		-0.407914	0.0490205		-0.360948	0.0576215		-0.541057	0.00753588		0.0469774	0.800229	1	-0.133216	0.500905	1	0.180199	0.319568	1
ENSG00000231369		grey	0.117764	0.493955	RP1-40G4P.1	44.5971	-1.61485	0.133184		0.115407	0.437218		0.0210045	0.870755		0.257768	0.0697523		-0.0944572	0.443271	1	0.142429	0.293684	1	-0.236895	0.0443762	1
ENSG00000226948		grey	0.115627	0.50188	RPS4XP2	2.3757	-5.18618	0.0217133		0.0786443	0.571204		-0.0736367	0.537107		0.0135111	0.918709		-0.152364	0.180415	1	-0.0651659	0.605584	1	-0.0872016	0.421023	1
ENSG00000241061		grey	-0.10972	0.524116	RPL5P1	120.761	-0.0927729	0.180678		0.0376737	0.863085		-0.0763369	0.72242		-0.398196	0.0686271		-0.11404	0.595323	1	-0.436011	0.0466564	1	0.32198	0.131849	1
ENSG00000229133		grey	-0.109107	0.526452	RPS7P4	1.61025	-4.01103	0.0772893		0.212626	0.0522041		0.0223018	0.81123		0.0330529	0.7503		-0.190428	0.031686	1	-0.179669	0.0683217	1	-0.0107594	0.898096	1
ENSG00000115307		grey	0.105377	0.540766	AUP1	4902.64	0.0616498	0.0149812	0.350419	0.0767682	0.475667	0.904578	0.0635082	0.622285	0.923288	0.349543	0.0021227	0.186257	-0.0132627	0.920896	1	0.272788	0.0221821	1	-0.286052	0.0383662	1
ENSG00000132718		grey	-0.101519	0.555764	SYT11	1033.46	0.0679089	0.176963		-0.227472	0.242875	0.809299	0.0396101	0.848796		0.224537	0.261007		0.267132	0.206583	1	0.452091	0.027177	1	-0.184961	0.388333	1
ENSG00000183337		grey	-0.0960387	0.5774	BCOR	1867.69	0.342688	0.176707	0.791522	-0.162408	0.389233	0.883163	0.189803	0.35153	0.817024	-0.234367	0.227414	0.821436	0.352283	0.0901534	1	-0.0719761	0.718254	1	0.424266	0.0446467	1
ENSG00000124574	Yes	grey	-0.0953366	0.580199	ABCC10	1276.36	0.157472	0.0539346		0.221523	0.190252	0.766076	0.108285	0.566456		-0.271022	0.123017		-0.113244	0.559006	1	-0.492609	0.00674403	1	0.37937	0.0556652	1
ENSG00000250896		grey	-0.0788503	0.647586	RNPS1P1	184.582	-0.312517	0.129892		-0.115128	0.585889		-0.154628	0.429412		-0.441176	0.0332248		-0.0395166	0.83677	1	-0.326198	0.108666	1	0.286692	0.126508	1
ENSG00000225630		grey	0.0593133	0.73113	MTND2P28	182.644	-1.6961	0.00771892		-0.121097	0.580718		-0.0725585	0.732016		-0.0482171	0.825117		0.0485523	0.81769	1	0.0729029	0.737441	1	-0.0243513	0.907103	1
ENSG00000099290		grey	0.0563118	0.744269	FAM21A	2509.86	-0.219022	0.172809	0.787253	-0.307279	0.0456067	0.528332	-0.191974	0.273765	0.756101	-0.279437	0.0818017	0.637282	0.115316	0.523136	1	0.027843	0.867505	1	0.0874739	0.637031	1
ENSG00000272150		grey	-0.0488793	0.777104	NBPF25P	29.3995	-0.88723	0.0357726		-0.1566	0.283935		-0.150301	0.23613		-0.282464	0.0432247		0.00630002	0.958465	1	-0.125939	0.344488	1	0.132245	0.252622	1
ENSG00000183943		grey	-0.0482265	0.780007	PRKX	3237.98	0.132742	0.226983	0.838112	0.197971	0.289503	0.838332	0.0827668	0.682818	0.93941	-0.206937	0.282569	0.860202	-0.115215	0.577427	1	-0.404975	0.0408195	1	0.289765	0.168286	1
ENSG00000204622		grey	-0.025444	0.882895	HLA-J	16.7666	-2.57639	0.019776		-0.189826	0.271484		-0.331712	0.0291485		-0.409812	0.013557		-0.14197	0.330945	1	-0.220111	0.167436	1	0.0781444	0.577605	1
ENSG00000166454		grey	0.0198718	0.908418	ATMIN	1712.67	0.349423	0.093112	0.678951	-0.143838	0.401574	0.889178	0.249336	0.19123	0.681876	0.248052	0.163231	0.769854	0.393234	0.0444586	1	0.391941	0.0331443	1	0.00129405	0.994836	1
ENSG00000137054		grey	0.0185471	0.9145	POLR1E	412.041	-0.647474	0.118614		0.0954142	0.650804		-0.176854	0.364288		-0.34197	0.0978539		-0.272379	0.153834	1	-0.43757	0.030834	1	0.165196	0.376424	1
ENSG00000100028		grey	0.0178215	0.917833	SNRPD3	1932.58	0.319947	0.0211667	0.398675	0.0334307	0.848933	0.976608	0.247655	0.201815	0.690238	0.503749	0.00558438	0.274616	0.214256	0.28109	1	0.470383	0.0122179	1	-0.256129	0.206816	1
ENSG00000146063		grey	0.0134163	0.938098	TRIM41	2032.44	-0.065203	0.147639	0.755336	-0.278417	0.0279346	0.460673	-0.0637923	0.668689	0.938775	-0.0318135	0.811365	0.98033	0.214639	0.16377	1	0.246619	0.0768127	1	-0.03198	0.84058	1
ENSG00000106628		grey	-0.0125289	0.942186	POLD2	1224.78	-0.349397	0.0835048		-0.121907	0.53906	0.909699	-0.248658	0.236321		-0.516404	0.0110125		-0.126778	0.552461	1	-0.394582	0.0574366	1	0.267808	0.215045	1
ENSG00000213782		grey	-0.0106836	0.950689	DDX47	406.95	-0.511139	0.0612329		-0.193789	0.376725		-0.275531	0.195563		-0.580658	0.00787894		-0.0817709	0.699591	1	-0.387013	0.0759944	1	0.305251	0.146444	1
ENSG00000162819		grey	0.00682383	0.968493	BROX	1422.32	-0.372292	0.144243	0.750906	-0.0752212	0.635239	0.933364	-0.294629	0.101363	0.589917	-0.336264	0.0420577	0.527391	-0.219439	0.235487	1	-0.261072	0.128369	1	0.041633	0.826276	1
ENSG00000065600		grey	-0.00284352	0.986868	TMEM206	1007.5	-0.153218	0.142807		-0.2073	0.252532	0.816139	-0.14085	0.477744		-0.436112	0.0198412		0.0664639	0.743288	1	-0.228851	0.235621	1	0.295319	0.153321	1
ENSG00000103089		turquoise	0.807243	2.71776e-09	FA2H	13.7346	11.4892	0.00483473		0	1		0.101758	0.039098		0	1		0.0948734	0.0410597	1	0	1	1	0.0902492	0.0398937	1
ENSG00000258405		turquoise	0.715215	9.50406e-07	ZNF578	18.5862	8.65194	0.000426922		0.0662065	0.496499		0.255276	0.00213203		0.0336326	0.715942		0.189172	0.0160674	1	-0.032595	0.70903	1	0.221777	0.00293433	1
ENSG00000279078		turquoise	0.71419	1.00134e-06	SND1-IT1	27.1188	24.3463	0.0103457		0.0395771	0.550145		0.102796	0.0673767		0	1		0.0632537	0.232242	1	-0.0244452	0.678935	1	0.0877026	0.0800369	1
ENSG00000241429		turquoise	0.681691	4.70497e-06	EEF1A1P25	11.0541	9.62481	0.0143574		0.0537729	0.534929		0.183121	0.0130908		0.0405341	0.62185		0.129419	0.0632574	1	-0.013247	0.864386	1	0.142672	0.0307448	1
ENSG00000272301		turquoise	0.653528	1.5493e-05	RP11-111M22.4	19.8632	11.9997	0.00464676		0.00982964	0.876353		0.119129	0.026189		0	1		0.109362	0.0302416	1	0.00389195	0.944892	1	0.105474	0.0271683	1
ENSG00000269696		turquoise	0.624183	4.74044e-05	AC007228.11	14.6388	24.4956	0.0240174		0	1		0.0814242	0.0657299		0	1		0.0759155	0.0683074	1	0	1	1	0.0722153	0.0666188	1
ENSG00000163666		turquoise	0.621159	5.28543e-05	HESX1	26.6816	23.9094	0.0415609		0.0184328	0.785606		0.103727	0.0712875		0.0430986	0.501779		0.0853421	0.115298	1	0.0246801	0.683007	1	0.0606646	0.236843	1
ENSG00000261544		turquoise	0.617938	5.92777e-05	RP11-16E23.3	6.34061	23.232	0.0460639		0	1		0.0812221	0.0660654		0	1		0.0757268	0.0686497	1	0	1	1	0.0720356	0.066955	1
ENSG00000267123		turquoise	0.597117	0.000120798	CTD-2357A8.3	6.22099	23.5598	0.0467471		0	1		0.0812152	0.0660768		0	1		0.0757204	0.0686614	1	0	1	1	0.0720295	0.0669665	1
ENSG00000273084		turquoise	0.596599	0.000122882	RP11-1275H24.3	7.13692	23.7348	0.0420395		0	1		0.0812618	0.0659995		0	1		0.0757638	0.0685824	1	0	1	1	0.0720709	0.0668889	1
ENSG00000154721	Yes	turquoise	0.596382	0.000123761	JAM2	10.3296	9.67698	0.0177487		0.0392497	0.601816		0.145016	0.0232801		0.020224	0.77657		0.105795	0.0791687	1	-0.0190315	0.776899	1	0.124867	0.0286678	1
ENSG00000171817		turquoise	0.592335	0.00014128	ZNF540	10.1173	24.1517	0.0320587		0	1		0.0813551	0.0658444		0	1		0.075851	0.0684242	1	0	1	1	0.0721539	0.0667336	1
ENSG00000206965		turquoise	0.586627	0.000169778	RNU6-5P	6.26996	23.2399	0.0464618		0	1		0.0812181	0.066072		0	1		0.0757231	0.0686565	1	0	1	1	0.0720321	0.0669617	1
ENSG00000061918		turquoise	0.583065	0.000190082	GUCY1B3	26.5256	9.66354	0.00937499		0.0817786	0.348818		0.166285	0.0253072		0.034077	0.680592		0.0845512	0.228392	1	-0.0477297	0.541276	1	0.132286	0.0467869	1
ENSG00000239455		turquoise	0.572143	0.000266593	RP11-561O4.1	6.78118	7.94212	0.0209857		0.00676303			0.112473			0.0119714			0.105771			0			0.100564
ENSG00000198171		turquoise	0.567939	0.000302714	DDRGK1	1222.13	0.777479	0.0626058		-0.0962795	0.637084	0.933364	0.420816	0.0481131		-0.0392365	0.85038		0.517221	0.016535	1	0.0570519	0.787782	1	0.460178	0.0345922	1
ENSG00000226501		turquoise	0.566133	0.000319525	USF1P1	7.17855	23.6711	0.0418434		0	1		0.0812637	0.0659962		0	1		0.0757657	0.0685791	1	0	1	1	0.0720726	0.0668857	1
ENSG00000112339		turquoise	0.559812	0.000385149	HBS1L	1027.17	0.633623	0.103475		0.151274	0.376464	0.875934	0.462608	0.0151222		0.18995	0.284595		0.311389	0.110832	1	0.0386802	0.833112	1	0.272713	0.171883	1
ENSG00000196604		turquoise	0.554219	0.000452971	POTEF	13.5267	4.00227	0.00196443		-0.0151042			0.276491			-0.00397379			0.291756			0.0111362			0.280631
ENSG00000117335	Yes	turquoise	-0.552487	0.000476028	CD46	4184.12	-0.571101	0.0101239	0.30872	-0.190103	0.119428	0.683671	-0.492802	0.000643114	0.103926	-0.12772	0.320875	0.883097	-0.302729	0.0426931	1	0.0623874	0.643016	1	-0.365119	0.0178909	1
ENSG00000160392		turquoise	0.549978	0.000511281	C19orf47	382.194	1.78096	0.113861		0.1422	0.483877		0.444622	0.0162771		0.285843	0.148796		0.30255	0.093301	1	0.143704	0.456612	1	0.158851	0.365226	1
ENSG00000264070		turquoise	0.548738	0.000529558	DND1P1	24.9362	2.16211	0.0337719		-0.0349332	0.614107		0.0561546	0.339682		-0.028261	0.666653		0.091139	0.100109	1	0.00667597	0.913983	1	0.0844667	0.107359	1
ENSG00000104728		turquoise	0.546131	0.00056986	ARHGEF10	70.3462	3.05759	0.213176		-0.0164372	0.863679		0.142047	0.0820877		0.0362366	0.690066		0.158572	0.0400112	1	0.0527043	0.539307	1	0.105872	0.148384	1
ENSG00000269176		turquoise	0.545646	0.000577651	RP11-727F15.12	58.1587	4.539	0.00357624		0.0942234	0.318284		0.163009	0.0429798		0.0165311	0.853623		0.0688216	0.36588	1	-0.0777376	0.358405	1	0.146566	0.042343	1
ENSG00000267048		turquoise	0.545554	0.000579151	RP11-566K11.7	14.8874	8.52281	0.00858161		0.0870784	0.392659		0.194664	0.0253527		0.113764	0.239698		0.107643	0.191212	1	0.0267001	0.770449	1	0.0809459	0.300541	1
ENSG00000204789		turquoise	0.543592	0.000611714	ZNF204P	6.1278	9.18479	0.0440722		0.00520967	0.920467		0.0805542	0.0683031		0.0089014	0.856887		0.0753875	0.0698788	1	0	1	1	0.0716968	0.0682282	1
ENSG00000171530		turquoise	0.541315	0.000651553	TBCA	1922.84	0.636721	0.00143057	0.114721	-0.122419	0.395069	0.884913	0.50271	0.00248615	0.158936	0.0242033	0.872492	0.989745	0.625199	0.000264613	1	0.146633	0.350652	1	0.47857	0.00663156	1
ENSG00000279977		turquoise	0.540887	0.000659298	CTD-3222D19.4	12.4785	24.4326	0.0272122		0	1		0.0813974	0.0657742		0	1		0.0758906	0.0683525	1	0	1	1	0.0721916	0.0666632	1
ENSG00000058673		turquoise	0.539581	0.000683415	ZC3H11A	6211.09	0.323002	0.011316	0.314485	-0.135768	0.228794	0.795463	0.276142	0.0400534	0.450349	-0.131643	0.269227	0.854841	0.411939	0.00309813	1	0.00412433	0.973643	1	0.407817	0.00461612	1
ENSG00000265298		turquoise	0.537603	0.00072144	RP13-104F24.3	10.3699	5.30405	0.0104589		0.0105516	0.906259		0.217549	0.00438699		0.0159701	0.850962		0.207114	0.00408042	1	0.00542123	0.946136	1	0.201701	0.00317809	1
ENSG00000071553		turquoise	-0.531424	0.000852585	ATP6AP1	6158.44	-0.530473	0.0340055	0.494235	-0.163603	0.220769	0.786253	-0.447307	0.00417669	0.197848	-0.255992	0.0682874	0.599305	-0.283736	0.0785436	1	-0.0923951	0.528485	1	-0.191343	0.249635	1
ENSG00000170473		turquoise	0.530659	0.000870209	WIBG	698.466	0.843424	0.0243199		0.10536	0.610323		0.44634	0.0371159		-0.202767	0.334925		0.341073	0.115425	1	-0.308205	0.149514	1	0.649291	0.00293741	1
ENSG00000109606		turquoise	-0.524529	0.00102349	DHX15	4334.94	-0.553146	0.0422955	0.513307	-0.0480833	0.730238	0.956829	-0.443229	0.00620383	0.231351	-0.00889284	0.951533	0.994027	-0.395195	0.018047	1	0.0391949	0.797236	1	-0.434394	0.0115707	1
ENSG00000136699		turquoise	-0.523066	0.0010634	SMPD4	1984.98	-0.690456	0.149412	0.759063	-0.128656	0.486603	0.906021	-0.438396	0.0293085	0.412439	-0.02009	0.916105	0.992643	-0.309819	0.13168	1	0.108584	0.580073	1	-0.41841	0.0454477	1
ENSG00000269881		turquoise	0.521041	0.00112094	AC004754.3	10.3471	6.20561	0.00193024		0.156735			0.345137			0.0622128			0.188497			-0.09458			0.283089
ENSG00000163808		turquoise	0.515851	0.00128112	KIF15	45.7988	1.77272	0.0398769		-0.0676812	0.452398		0.0684981	0.372213		-0.0397228	0.642009		0.136255	0.0601872	1	0.0279748	0.728755	1	0.108285	0.115186	1
ENSG00000009790		turquoise	0.513593	0.00135687	TRAF3IP3	5825.14	0.37062	0.200235	0.81825	0.172331	0.187366	0.76555	0.316324	0.038948	0.442906	0.127093	0.355223	0.899442	0.14401	0.362943	1	-0.045242	0.752679	1	0.189253	0.246197	1
ENSG00000080200		turquoise	0.50677	0.00161029	CRYBG3	1559.81	0.549087	0.120508	0.716027	0.142542	0.366901	0.870644	0.423482	0.0181395	0.339344	0.142582	0.386877	0.907155	0.280982	0.127479	1	3.87367e-05	0.999819	1	0.280947	0.137286	1
ENSG00000196917	Yes	turquoise	0.506583	0.00161776	HCAR1	13.8307	10.3004	0.0281332		0.00556189	0.916403		0.0835238	0.0627384		0.00937259	0.851684		0.0780063	0.0648021	1	0	1	1	0.0741966	0.0632021	1
ENSG00000250321		turquoise	0.503555	0.00174348	RP11-478C6.4	21.2738	1.85217	0.10101		-0.0141772	0.939876		0.36055	0.0319729		0.028805	0.874159		0.374894	0.0210248	1	0.0430016	0.806814	1	0.331903	0.0345711	1
ENSG00000243547		turquoise	-0.500087	0.00189788	HNRNPKP4	2002.18	-0.486178	0.0803957	0.658863	-0.261205	0.070555	0.604142	-0.395637	0.0176877	0.339344	-0.10316	0.495376	0.937532	-0.134456	0.434385	1	0.158059	0.315986	1	-0.292518	0.0981707	1
ENSG00000165275		turquoise	0.498113	0.00199106	TRMT10B	431.43	0.966726	0.147869		0.134946	0.534882		0.312399	0.129269		-0.137479	0.522377		0.177523	0.382829	1	-0.272532	0.200069	1	0.450069	0.024688	1
ENSG00000168528	Yes	turquoise	0.498064	0.00199341	SERINC2	23.4583	7.29023	0.0484524		0.0285778	0.73817		0.131555	0.0707019		0.104726	0.196419		0.103035	0.133725	1	0.0761917	0.319254	1	0.0268445	0.68017	1
ENSG00000101181		turquoise	0.497716	0.00201024	MTG2	628.521	0.974419	0.0831332		0.161637	0.461004		0.370038	0.0813537		-0.15012	0.491745		0.208477	0.323529	1	-0.311867	0.15204	1	0.520359	0.0129174	1
ENSG00000130305		turquoise	0.492574	0.00227412	NSUN5	1055.37	0.930614	0.0844712		0.19029	0.352797	0.86524	0.539342	0.0114396		0.24237	0.24532		0.349143	0.10607	1	0.0520906	0.806309	1	0.297058	0.172868	1
ENSG00000198252		turquoise	0.489528	0.0024443	STYX	1088.3	0.553077	0.188684		-0.130485	0.507974	0.90783	0.317461	0.129079		0.0190443	0.924843		0.448045	0.0351807	1	0.149556	0.469061	1	0.298494	0.165889	1
ENSG00000073670	Yes	turquoise	0.488996	0.00247514	ADAM11	25.1201	2.22388	0.00194694		-0.0549816	0.522914		0.0910403	0.214126		-0.0441848	0.588228		0.146104	0.0346911	1	0.010803	0.888442	1	0.135306	0.0390514	1
ENSG00000184164		turquoise	-0.481326	0.00295908	CRELD2	791.012	-0.461944	0.0431135		0.271224	0.144911		-0.242566	0.229864		0.260084	0.175045		-0.513901	0.0127297	1	-0.0111373	0.954967	1	-0.502772	0.0165815	1
ENSG00000088812	Yes	turquoise	-0.478706	0.00314227	ATRN	1911.58	-0.76435	0.0113653	0.314485	-0.317092	0.0594543	0.566889	-0.549555	0.00349264	0.189136	-0.0102911	0.953047	0.994027	-0.232521	0.228611	1	0.306839	0.0899264	1	-0.539368	0.00632409	1
ENSG00000095587		turquoise	0.476824	0.00327988	TLL2	17.3624	9.14744	0.0400231		0.00819817	0.897451		0.0869095	0.107207		0.0483689	0.421828		0.078756	0.121221	1	0.040194	0.478376	1	0.0385635	0.42252	1
ENSG00000277734		turquoise	0.475154	0.00340633	TRAC	68.4413	2.18418	0.00990783		0.0381544	0.699902		0.0999023	0.237295		-0.0308885	0.742422		0.0617807	0.439579	1	-0.0690828	0.436801	1	0.130869	0.0844923	1
ENSG00000148296		turquoise	-0.474878	0.00342767	SURF6	1364.68	-0.709954	0.0192708	0.381257	0.00742824	0.963863	0.993665	-0.518717	0.00495317	0.203306	-0.260152	0.12746	0.708656	-0.526231	0.00551997	1	-0.26761	0.130327	1	-0.258625	0.182965	1
ENSG00000134046		turquoise	0.471592	0.00369039	MBD2	3280.49	0.343992	0.0289426	0.449762	-0.0809011	0.50988	0.90783	0.286519	0.0481711	0.47882	-0.141609	0.273696	0.858936	0.367451	0.0142942	1	-0.060713	0.65368	1	0.428167	0.00568968	1
ENSG00000170832		turquoise	-0.471015	0.00373822	USP32	2290.61	-0.584668	0.01821	0.371733	-0.284274	0.0515892	0.543791	-0.48131	0.00424041	0.197848	-0.346932	0.0233004	0.46674	-0.197066	0.256087	1	-0.0626643	0.693968	1	-0.134403	0.451235	1
ENSG00000104833		turquoise	0.46852	0.00395157	TUBB4A	33.466	2.49035	0.0428814		-0.0121517	0.884803		0.0929328	0.192977		-0.0264823	0.73911		0.105142	0.118624	1	-0.0143394	0.848417	1	0.119487	0.0612608	1
ENSG00000160360		turquoise	-0.468338	0.0039675	GPSM1	129.692	-8.91888	0.0032557		-0.14941	0.312981		-0.216595	0.0923445		-0.11893	0.401161		-0.0672284	0.583988	1	0.0304949	0.821481	1	-0.0977278	0.405147	1
ENSG00000176390		turquoise	0.466869	0.00409847	CRLF3	1986.85	0.668019	0.00487702	0.230555	0.243159	0.125418	0.691763	0.506429	0.00486716	0.203306	-0.0903184	0.585257	0.957246	0.263316	0.154578	1	-0.333516	0.0521692	1	0.596839	0.0016531	1
ENSG00000260306		turquoise	0.464779	0.00429118	RP11-645C24.5	33.0365	11.3797	5.12639e-07		0.222002	0.0408447		0.195771	0.0351571		0	1		-0.0262442	0.765544	1	-0.177663	0.0689232	1	0.151425	0.0701101	1
ENSG00000184232		turquoise	-0.463799	0.0043842	OAF	1133.11	-0.687119	0.0968521		-0.330587	0.0757119	0.613808	-0.471348	0.0196402		-0.302059	0.115367		-0.140803	0.494967	1	0.0285308	0.885042	1	-0.169337	0.419784	1
ENSG00000143947		turquoise	0.461191	0.00464038	RPS27A	10176	0.34986	0.232677	0.846218	0.0758538	0.548393	0.909699	0.29788	0.0452813	0.46783	0.0596779	0.653808	0.969526	0.222048	0.14887	1	-0.0161775	0.907408	1	0.238227	0.133326	1
ENSG00000076662	Yes	turquoise	-0.459664	0.00479623	ICAM3	9093.59	-0.22017	0.086681	0.667624	0.105812	0.277557	0.831158	-0.195945	0.0959312	0.582855	0.0729631	0.479712	0.935104	-0.301773	0.0134027	1	-0.0328497	0.76179	1	-0.268925	0.0333452	1
ENSG00000101751		turquoise	-0.458187	0.00495133	POLI	641.093	-0.916394	0.133194		0.0246437	0.907685		-0.375816	0.0818287		0.0910494	0.671817		-0.400602	0.0655858	1	0.0664236	0.760012	1	-0.467038	0.0323884	1
ENSG00000185513		turquoise	0.456381	0.00514679	L3MBTL1	482.738	0.939259	0.0257636		0.0879317	0.687652		0.310516	0.137665		-0.307898	0.155713		0.222666	0.282669	1	-0.395989	0.0659717	1	0.618673	0.00251053	1
ENSG00000234106		turquoise	0.454929	0.00530869	RP11-288E14.2	8.72479	4.04413	0.00201956		0.242603			0.545558			0.109862			0.303091			-0.132817			0.435924
ENSG00000153179		turquoise	0.45403	0.00541116	RASSF3	2553.77	0.683838	0.00542758	0.236173	0.134202	0.388784	0.883148	0.54051	0.00228602	0.157383	0.415585	0.0105557	0.343489	0.406363	0.0258491	1	0.281412	0.0955224	1	0.124952	0.504206	1
ENSG00000121064		turquoise	-0.452061	0.00564149	SCPEP1	2874.65	-0.634428	0.0307333	0.466001	-0.100455	0.516221	0.90783	-0.493428	0.00515155	0.205436	-0.302001	0.0616485	0.585681	-0.39303	0.0304028	1	-0.201566	0.229968	1	-0.191467	0.304158	1
ENSG00000123505		turquoise	-0.45033	0.00585095	AMD1	3303.43	-0.448059	0.0143033	0.343508	-0.150124	0.216833	0.78378	-0.381993	0.00792296	0.251456	0.0863525	0.500264	0.94115	-0.231895	0.11918	1	0.236491	0.0776649	1	-0.468389	0.00229645	1
ENSG00000261519		turquoise	0.4492	0.00599134	RP11-403P17.4	6.01244	10.2975	0.0282539		0	1		0.0812029	0.0660975		0	1		0.0757088	0.0686824	1	0	1	1	0.0720185	0.0669871	1
ENSG00000154165	Yes	turquoise	0.44704	0.00626757	GPR15	22.7868	24.1499	0.0476712		0.0235576	0.673308		0.0763568	0.106773		0	1		0.0528287	0.235891	1	-0.0129358	0.794849	1	0.0657674	0.11864	1
ENSG00000263606		turquoise	0.446648	0.00631889	RP11-737O24.3	23.2942	6.29794	0.0612147		0.0262718	0.768683		0.15511	0.0415768		0.100527	0.235502		0.128909	0.0729342	1	0.0742976	0.353027	1	0.0546141	0.422951	1
ENSG00000107669		turquoise	0.436071	0.00784583	ATE1	944.615	0.562173	0.101248		-0.242624	0.246433		0.278513	0.195386		0.136625	0.520039		0.521272	0.0164313	1	0.379338	0.0784352	1	0.141938	0.516013	1
ENSG00000167635		turquoise	0.435147	0.00799309	ZNF146	1582.01	0.513891	0.0665507	0.620081	-0.0674672	0.668004	0.936556	0.387362	0.0301029	0.418355	0.0940483	0.566555	0.952099	0.45489	0.0133088	1	0.161531	0.343144	1	0.293362	0.119582	1
ENSG00000144021		turquoise	-0.434944	0.00802578	CIAO1	2649.23	-0.449905	0.0211619	0.398675	0.0540183	0.688999	0.943311	-0.357143	0.023422	0.371679	0.161544	0.254531	0.847615	-0.411209	0.0114954	1	0.107535	0.467356	1	-0.518748	0.00196888	1
ENSG00000272644		turquoise	0.433597	0.00824542	RP11-33O4.1	28.9392	23.2887	0.00291227		0.0415917	0.648276		0.138155	0.0754867		0.132674	0.125114		0.0966166	0.188188	1	0.0911335	0.26458	1	0.00548329	0.937225	1
ENSG00000147123		turquoise	-0.428684	0.00909057	NDUFB11	1802.76	-0.620644	0.054503	0.579444	-0.0731039	0.646294	0.933364	-0.454221	0.0118521	0.288352	0.0381023	0.818525	0.982475	-0.381183	0.0400123	1	0.11122	0.51872	1	-0.492409	0.00965823	1
ENSG00000213741		turquoise	0.42847	0.00912895	RPS29	6772.36	0.42554	0.0703738	0.630501	0.12246	0.31084	0.849355	0.369055	0.00986673	0.282266	0.0856582	0.501332	0.94115	0.246617	0.0955447	1	-0.0368045	0.78244	1	0.283424	0.0635735	1
ENSG00000154127		turquoise	-0.424803	0.00980941	UBASH3B	678.254	-1.39013	0.0857815		-0.0545137	0.80364		-0.459928	0.0299919		-0.307021	0.159439		-0.405583	0.0542215	1	-0.252591	0.245468	1	-0.152999	0.463572	1
ENSG00000179364		turquoise	-0.423618	0.0100382	PACS2	3431.2	-0.607883	0.0198767	0.387879	-0.181299	0.195135	0.77074	-0.491904	0.00245968	0.158936	-0.030279	0.836579	0.985182	-0.310648	0.0638456	1	0.151033	0.323744	1	-0.461686	0.0074501	1
ENSG00000078177		turquoise	-0.422115	0.0103351	N4BP2	1167.49	-0.570798	0.0932636		-0.120218	0.551392	0.909699	-0.287486	0.174682		0.241001	0.242123		-0.167331	0.436218	1	0.361292	0.0857185	1	-0.528633	0.014916	1
ENSG00000232891		turquoise	0.4208	0.0106009	RP11-136K14.1	50.5342	0.910856	0.00108956		-0.125235	0.26569		0.0237976	0.805112		-0.136851	0.200934		0.149115	0.102698	1	-0.0116239	0.908688	1	0.160745	0.0642188	1
ENSG00000070614		turquoise	-0.419534	0.0108622	NDST1	2629.51	-0.353128	0.135932	0.748146	0.215816	0.201112	0.772924	-0.225997	0.23091	0.712144	0.11602	0.508264	0.942985	-0.441886	0.0224449	1	-0.0998061	0.582375	1	-0.342085	0.0840141	1
ENSG00000100347		turquoise	0.418763	0.0110241	SAMM50	1497.78	0.740051	0.0685386	0.630021	0.177075	0.34037	0.859404	0.490438	0.015038	0.317429	0.0457047	0.811339	0.98033	0.313431	0.12815	1	-0.131393	0.504698	1	0.444831	0.0338229	1
ENSG00000122490		turquoise	-0.418271	0.0111284	PQLC1	2338.54	-0.455217	0.219361	0.836286	-0.0751549	0.611782	0.926428	-0.359757	0.0345774	0.436463	-0.126343	0.414915	0.917971	-0.284642	0.104698	1	-0.0511919	0.750937	1	-0.233452	0.195383	1
ENSG00000162004		turquoise	0.416666	0.0114744	CCDC78	41.6117	8.66598	0.0198211		0.0334188			0.115861			0.0451942			0.0824874			0.011782			0.0707084
ENSG00000166716		turquoise	-0.413494	0.0121856	ZNF592	4243.91	-0.45779	0.163548	0.776425	-0.129321	0.356759	0.866056	-0.374583	0.0213949	0.357018	-0.135433	0.357528	0.899736	-0.245293	0.144219	1	-0.00611162	0.968231	1	-0.239184	0.166536	1
ENSG00000144597		turquoise	-0.411581	0.0126322	EAF1	1188.51	-1.02715	0.0255433		-0.34248	0.0832153	0.624438	-0.598871	0.00426189		-0.103974	0.607464		-0.256483	0.228618	1	0.23855	0.249253	1	-0.495044	0.0217256	1
ENSG00000160049		turquoise	0.409902	0.0130355	DFFA	1421.66	0.628404	0.177851	0.793966	0.0902287	0.647428	0.933364	0.370656	0.0765457	0.544582	-0.0673387	0.738937	0.973822	0.280497	0.187483	1	-0.157601	0.445824	1	0.438105	0.0420737	1
ENSG00000138246		turquoise	-0.408707	0.013329	DNAJC13	3417.78	-0.255129	0.0474608	0.539611	0.0291889	0.795843	0.967794	-0.216888	0.107089	0.593019	0.189622	0.111448	0.689368	-0.246097	0.0774068	1	0.160442	0.198584	1	-0.406541	0.00476491	1
ENSG00000100427		turquoise	0.408256	0.0134411	MLC1	83.5801	6.19887	0.0916874		0.0583429	0.512835		0.175759	0.0206825		0.0416133	0.622655		0.117479	0.101502	1	-0.0167398	0.83391	1	0.134225	0.0484308	1
ENSG00000184216		turquoise	-0.40807	0.0134878	IRAK1	6299.12	-0.376272	0.115056	0.706761	-0.160697	0.168829	0.746097	-0.332016	0.0167499	0.331273	-0.148058	0.229605	0.822989	-0.171335	0.233001	1	0.0126405	0.921962	1	-0.183977	0.21513	1
ENSG00000235290		turquoise	0.407714	0.0135772	HLA-W	4.17031	2.98154	0.0617139		-0.0298908	0.723558		0.123849	0.0851358		-0.0159112	0.842592		0.153825	0.023464	1	0.0139876	0.853193	1	0.139844	0.0297299	1
ENSG00000089234		turquoise	0.407174	0.0137138	BRAP	690.263	0.308025	0.00989827		-0.466048	0.0178462		0.123117	0.555681		-0.380853	0.0588145		0.589292	0.00556128	1	0.0852054	0.679603	1	0.504096	0.0192087	1
ENSG00000175711		turquoise	-0.406709	0.0138324	B3GNTL1	644.126	-1.0314	0.0236696		-0.191445	0.381583		-0.469268	0.0286274		-0.615072	0.00492736		-0.277928	0.194042	1	-0.423772	0.0529628	1	0.145848	0.493094	1
ENSG00000229816		turquoise	0.406492	0.013888	DDX50P1	13.1631	6.83886	0.0127315		0.0231557	0.808124		0.18091	0.0261806		0.127136	0.160131		0.157842	0.0401022	1	0.10404	0.22374	1	0.0538045	0.46082	1
ENSG00000108592		turquoise	0.402142	0.0150432	FTSJ3	1778.28	0.510951	0.117776	0.710177	-0.0277083	0.875915	0.9813	0.338522	0.0834065	0.554542	-0.119774	0.514323	0.947648	0.366298	0.0673285	1	-0.0920818	0.627096	1	0.458386	0.0248358	1
ENSG00000077380		turquoise	-0.402142	0.0150433	DYNC1I2	1409.62	-0.415121	0.123158	0.726813	0.255473	0.176757	0.751979	-0.216393	0.289067	0.772207	0.160086	0.410784	0.917416	-0.471968	0.023407	1	-0.0953982	0.633211	1	-0.376577	0.0751076	1
ENSG00000232472		turquoise	0.401688	0.0151684	EEF1B2P3	4371.33	0.17708	0.111531	0.700793	-0.118406	0.232463	0.795687	0.159039	0.183409	0.674994	0.0797672	0.447405	0.919085	0.277458	0.0252028	1	0.19818	0.0721412	1	0.079278	0.536743	1
ENSG00000101346		turquoise	0.397979	0.0162236	POFUT1	1173.58	0.537925	0.172531		0.214228	0.203881	0.778088	0.398088	0.0346242		0.103296	0.555428		0.183895	0.341569	1	-0.110947	0.540546	1	0.294846	0.136023	1
ENSG00000196230		turquoise	-0.395145	0.017071	TUBB	4107.57	-0.548428	0.112056	0.700793	-0.254962	0.108655	0.670312	-0.42237	0.0190274	0.347552	-0.143093	0.387847	0.908698	-0.167442	0.366054	1	0.111881	0.515379	1	-0.279326	0.141369	1
ENSG00000171858		turquoise	0.391641	0.0181695	RPS21	8221.53	0.342049	0.120271	0.716027	0.0199426	0.861449	0.977286	0.298491	0.0282504	0.41101	0.0188654	0.87574	0.990065	0.27857	0.0479768	1	-0.00107791	0.993194	1	0.27965	0.0547525	1
ENSG00000244219		turquoise	0.391217	0.0183063	GS1-259H13.2	9.6745	10.0868	0.031052		0	1		0.0646551	0.195397		0.0515988	0.354732		0.0575698	0.220818	1	0.0445063	0.396384	1	0.0130641	0.768942	1
ENSG00000177311		turquoise	-0.389675	0.0188112	ZBTB38	861.652	-0.464045	0.205365		0.0885909	0.636318		-0.262414	0.195915		0.172094	0.372503		-0.351087	0.0900526	1	0.0835194	0.673732	1	-0.434614	0.0390416	1
ENSG00000146457		turquoise	-0.389513	0.0188649	WTAP	3161.49	-0.550958	0.140097	0.750906	-0.0899743	0.580904	0.917436	-0.412741	0.0246338	0.380909	-0.230789	0.173824	0.77564	-0.32282	0.087198	1	-0.14083	0.423428	1	-0.181992	0.346528	1
ENSG00000204438		turquoise	0.389235	0.0189572	GPANK1	418.05	1.27137	0.16237		0.209215	0.327949		0.408292	0.0407069		0.396634	0.0592517		0.199157	0.309754	1	0.187488	0.364955	1	0.0116699	0.951602	1
ENSG00000220749		turquoise	0.38458	0.0205631	RPL21P28	110	1.00554	0.217983		-0.136834	0.519711		0.268773	0.173618		0.00486068	0.981417		0.40577	0.0363162	1	0.141752	0.489393	1	0.264026	0.164328	1
ENSG00000162645		turquoise	-0.382663	0.0212565	GBP2	1319.2	-0.772758	0.0485408		0.18938	0.358545	0.866056	-0.327132	0.126219		0.222358	0.289356		-0.51667	0.0170185	1	0.0329888	0.877202	1	-0.549672	0.0117729	1
ENSG00000176809	Yes	turquoise	-0.381014	0.0218684	LRRC37A3	121.031	-5.89658	0.0197103		-0.13634	0.368168		-0.175801	0.182544		0.00665135	0.963424		-0.0394894	0.753856	1	0.143064	0.301628	1	-0.182561	0.129799	1
ENSG00000164587		turquoise	0.380479	0.0220699	RPS14	53107.2	0.182549	0.129354	0.740405	0.0620703	0.367851	0.871441	0.175564	0.0382505	0.442906	0.129829	0.0766557	0.61808	0.113497	0.197279	1	0.0677599	0.380104	1	0.0457375	0.616779	1
ENSG00000071967		turquoise	-0.380213	0.0221705	CYBRD1	1010.72	-0.766774	0.11868		0.17887	0.392229	0.884658	-0.342019	0.11168		-0.0615687	0.771694		-0.521043	0.0164498	1	-0.240489	0.264186	1	-0.280561	0.199173	1
ENSG00000135124	Yes	turquoise	0.378676	0.0227609	P2RX4	955.13	0.673229	0.146722		-0.0361697	0.862275		0.337793	0.115829		-0.132928	0.53011		0.374063	0.0848881	1	-0.0967855	0.652621	1	0.470858	0.0311615	1
ENSG00000160221		turquoise	0.378176	0.0229556	C21orf33	53.8006	0.930733	0.0203383		-0.20265	0.250663		0.0952517	0.541636		-0.29186	0.0859413		0.298044	0.0471048	1	-0.0892671	0.585155	1	0.387326	0.00736335	1
ENSG00000003096		turquoise	0.377175	0.0233498	KLHL13	30.3574	4.11016	0.0331722		0.00262951	0.973695		0.0934234	0.168338		0.0934674	0.216213		0.0908453	0.155621	1	0.0908892	0.202229	1	-4.39855e-05	0.999421	1
ENSG00000223599		turquoise	0.374146	0.0245764	RP11-216N14.7	3.08199	9.33358	0.0474167		0	1		0.080849	0.0666893		0	1		0.0753784	0.0692862	1	0	1	1	0.0717037	0.06758	1
ENSG00000261222		turquoise	-0.373847	0.0247003	CTD-2006K23.1	655.19	-0.649406	0.199931		0.303492	0.164697		-0.102962	0.621054		0.153061	0.479378		-0.406611	0.0486083	1	-0.150475	0.483357	1	-0.256145	0.208163	1
ENSG00000237973		turquoise	0.373478	0.0248539	RP5-857K21.6	796.772	0.721164	0.0504452		-0.0207586	0.917322		0.436229	0.0385095		0.364192	0.0747968		0.457092	0.0327616	1	0.385026	0.0652007	1	0.0720675	0.739258	1
ENSG00000096996	Yes	turquoise	-0.371615	0.0256417	IL12RB1	1055.71	-0.860097	0.20354		-0.223628	0.288585	0.838332	-0.4505	0.0366049		-0.301777	0.157555		-0.226952	0.296678	1	-0.0781691	0.717966	1	-0.148788	0.495927	1
ENSG00000104549		turquoise	-0.371445	0.0257147	SQLE	540.574	-0.729242	0.102834		0.302668	0.16681		-0.209233	0.328555		-0.0642834	0.768861		-0.512077	0.0165307	1	-0.367054	0.0935153	1	-0.145028	0.49459	1
ENSG00000267058		turquoise	0.367914	0.027268	RP11-15A1.3	36.825	23.4495	0.0112381		0.0988114	0.229545		0.102656	0.142339		0.0480523	0.537633		0.00384715	0.953537	1	-0.0507874	0.489789	1	0.0546369	0.382444	1
ENSG00000068120		turquoise	0.366983	0.02769	COASY	2651.79	0.41942	0.0632571	0.602573	0.025747	0.846929	0.976608	0.35298	0.0235331	0.372122	0.232941	0.0964896	0.672571	0.327265	0.0420704	1	0.207209	0.156699	1	0.120057	0.469238	1
ENSG00000266998		turquoise	0.366864	0.0277445	RP11-936I5.1	5.71796	10.2251	0.0293764		0	1		0.0811838	0.0661292		0	1		0.075691	0.0687148	1	0	1	1	0.0720015	0.067019	1
ENSG00000137055		turquoise	-0.366598	0.0278665	PLAA	845.428	-0.9211	0.0849043		-0.209375	0.296757		-0.536886	0.0110205		-0.317691	0.121301		-0.327609	0.126556	1	-0.108339	0.60487	1	-0.219276	0.311811	1
ENSG00000119714	Yes	turquoise	0.363304	0.0294116	GPR68	17.5205	23.4798	0.0128452		0.0562935	0.409263		0.0951928	0.100154		0	1		0.0389207	0.475641	1	-0.0402007	0.508818	1	0.0791248	0.125424	1
ENSG00000138738		turquoise	0.362188	0.0299512	PRDM5	12.0022	23.2084	0.0128249		0.00989695	0.884481		0.123753	0.0323133		0.0334405	0.604155		0.11392	0.036525	1	0.0235574	0.698216	1	0.0903809	0.0796301	1
ENSG00000214941		turquoise	0.359678	0.0311936	ZSWIM7	815.704	0.656874	0.230862		0.226348	0.256589		0.412746	0.0499684		0.308027	0.131105		0.186447	0.38336	1	0.0816968	0.695127	1	0.104752	0.628291	1
ENSG00000232388		turquoise	0.358962	0.0315555	LINC00493	848.201	0.17039	0.0179085		-0.46358	0.00809386		0.0779138	0.687387		-0.239347	0.186882		0.54158	0.00635011	1	0.224261	0.231337	1	0.317323	0.11725	1
ENSG00000217624		turquoise	-0.358186	0.0319521	RP11-204C16.4	384.673	-0.659077	0.0151582		0.29434	0.159807		0.0352887	0.854926		0.545172	0.00782565		-0.259181	0.17	1	0.250921	0.21153	1	-0.510118	0.00570282	1
ENSG00000198945		turquoise	0.355465	0.0333736	L3MBTL3	663.77	0.183945	0.0381487		-0.326019	0.125687		0.0129824	0.952082		-0.514493	0.0168167		0.339097	0.119119	1	-0.188536	0.386395	1	0.527645	0.0156092	1
ENSG00000259607		turquoise	0.355138	0.0335481	CTD-2647L4.5	6.36031	23.8674	0.0459363		0	1		0.0812235	0.0660631		0	1		0.0757281	0.0686473	1	0	1	1	0.0720368	0.0669527	1
ENSG00000128335		turquoise	-0.35323	0.0345804	APOL2	788.733	-0.264286	0.128936		0.0997392	0.63435		-0.0732843	0.733483		0.399149	0.0605696		-0.173084	0.42579	1	0.299478	0.165182	1	-0.472572	0.0305814	1
ENSG00000204149		turquoise	-0.35033	0.0361982	AGAP6	897.28	-0.658249	0.0653826		-0.0750513	0.691452		-0.433656	0.0336131		-0.409651	0.0353199		-0.358684	0.0849608	1	-0.334658	0.094159	1	-0.0240274	0.909597	1
ENSG00000145041		turquoise	-0.348461	0.0372729	VPRBP	1368.58	-0.752965	0.0308177	0.466001	-0.369537	0.0429738	0.525829	-0.506013	0.011183	0.288352	-0.0557473	0.767422	0.973822	-0.136524	0.503225	1	0.313838	0.106041	1	-0.450369	0.0301339	1
ENSG00000141959		turquoise	-0.347363	0.0379166	PFKL	8708.54	-0.204685	0.157792	0.772168	0.0773822	0.395767	0.884913	-0.186563	0.0915153	0.580828	-0.00987016	0.918655	0.992643	-0.263957	0.0213706	1	-0.0872548	0.390094	1	-0.176703	0.13712	1
ENSG00000138459	Yes	turquoise	0.347048	0.0381027	SLC35A5	948.828	0.428538	0.0414531		0.0310609	0.873202		0.234084	0.259657		-0.370418	0.0636009		0.203076	0.336768	1	-0.401561	0.0496583	1	0.604647	0.00479418	1
ENSG00000143119	Yes	turquoise	0.346935	0.0381697	CD53	12128	0.194707	0.246611	0.852311	0.0345037	0.718895	0.95296	0.176299	0.128124	0.613869	-0.0697838	0.492115	0.937532	0.141803	0.237971	1	-0.104292	0.328171	1	0.246096	0.0480302	1
ENSG00000140521		turquoise	0.346517	0.0384186	POLG	3863.76	0.316779	0.0992765	0.688903	0.106753	0.277962	0.831255	0.289244	0.0148215	0.317351	0.0650303	0.532679	0.949333	0.182502	0.138101	1	-0.041725	0.702884	1	0.224228	0.0785206	1
ENSG00000100982		turquoise	-0.34415	0.0398516	PCIF1	1971.09	-0.53202	0.214876	0.832565	0.0293082	0.866615	0.979252	-0.362042	0.0610305	0.511444	-0.117684	0.515228	0.948434	-0.391423	0.048107	1	-0.147011	0.43134	1	-0.244416	0.226825	1
ENSG00000213693		turquoise	0.33848	0.0434612	SEC14L1P1	32.8084	7.72197	0.0498879		0.115315	0.166899		0.0978394	0.16818		0.0410879	0.603409		-0.0174845	0.794139	1	-0.0742681	0.319573	1	0.056786	0.371096	1
ENSG00000109787		turquoise	-0.337752	0.0439434	KLF3	3505.83	-0.613395	0.00518571	0.234038	-0.0986814	0.458992	0.898768	-0.51518	0.00094758	0.114606	-0.321562	0.0217019	0.462456	-0.416543	0.00966377	1	-0.222897	0.127472	1	-0.193648	0.243117	1
ENSG00000164597		turquoise	-0.336698	0.0446491	COG5	1122.63	-0.742366	0.138888		-0.234287	0.235751	0.79904	-0.429335	0.0404053		-0.0057271	0.977417		-0.195115	0.359614	1	0.228604	0.269344	1	-0.423727	0.0494268	1
ENSG00000152213		turquoise	-0.335814	0.0452476	ARL11	428.671	-0.891331	0.104855		-0.0273405	0.896632		-0.384725	0.0741531		0.135196	0.526169		-0.357513	0.100123	1	0.162575	0.452173	1	-0.520101	0.017303	1
ENSG00000151366		turquoise	-0.334665	0.0460354	NDUFC2	435.539	-0.69322	0.197327		0.0418571	0.848301		-0.142921	0.49513		0.287636	0.185208		-0.184866	0.373382	1	0.245857	0.25433	1	-0.430736	0.0358331	1
ENSG00000153707	Yes	turquoise	0.332816	0.0473258	PTPRD	16.465	9.17622	0.00321629		0.0122832	0.873519		0.0886412	0.176542		0.115614	0.113837		0.0764019	0.216788	1	0.103389	0.133654	1	-0.0269807	0.645078	1
ENSG00000275854		turquoise	0.331521	0.0482471	RP11-278C7.5	14.6608	24.0257	0.0351518		0.00580495	0.911527		0.0811715	0.066573		0	1		0.0754094	0.0701692	1	0.00345015	0.940848	1	0.0719624	0.0675782	1
ENSG00000249774		turquoise	0.33006	0.0493041	CTD-2206G10.2	9.30508	5.50113	0.0401741		0.0836492	0.383328		0.197473	0.015877		0.0279594	0.758829		0.113884	0.141188	1	-0.0557231	0.517288	1	0.169615	0.0208796	1
ENSG00000109171		turquoise	-0.328375	0.0505456	SLAIN2	1620.95	-0.557793	0.27715	0.873202	-0.115767	0.510973	0.90783	-0.383055	0.0489574	0.481504	-0.0867536	0.634328	0.968594	-0.267346	0.179736	1	0.0290178	0.877539	1	-0.296368	0.145069	1
ENSG00000217094		turquoise	0.326609	0.0518731	PPIAP31	54.4317	2.47674	0.00727398		0.525693	0.00976249		0.614534	0.000919496		0.340906	0.0855494		0.088883	0.62297	1	-0.18486	0.339336	1	0.273752	0.11968	1
ENSG00000089094		turquoise	0.325866	0.05244	KDM2B	4962.86	0.25126	0.0811994	0.659194	0.0971047	0.380698	0.877875	0.21996	0.0964391	0.582855	-0.122461	0.295528	0.86607	0.122867	0.369917	1	-0.219577	0.0734491	1	0.342446	0.0156684	1
ENSG00000136689		turquoise	0.325151	0.0529906	IL1RN	998.962	0.290484	0.063497		-0.351486	0.0643962	0.587103	0.162032	0.428577		0.0829622	0.671205		0.513617	0.0138849	1	0.434522	0.030385	1	0.0790969	0.709133	1
ENSG00000167881		turquoise	-0.324007	0.0538802	SRP68	1942.03	-0.550499	0.214461	0.832565	0.001565	0.992775	0.997321	-0.377473	0.0492249	0.482839	-0.0813059	0.650131	0.969526	-0.379109	0.0540224	1	-0.0828803	0.654634	1	-0.296234	0.140585	1
ENSG00000124562		turquoise	-0.322929	0.05473	SNRPC	1050.02	-0.940464	0.124682		-0.26844	0.192454	0.768708	-0.510765	0.0168902		-0.206205	0.325228		-0.242412	0.262686	1	0.0622481	0.770408	1	-0.304668	0.162575	1
ENSG00000279277		turquoise	0.319731	0.0573129	RP11-861A13.3	37.2735	23.4844	0.0204664		0.0300883	0.690352		0.0878014	0.171311		0.0900171	0.208408		0.0577455	0.340025	1	0.0599623	0.374016	1	-0.00221694	0.969143	1
ENSG00000181381		turquoise	0.319712	0.0573284	DDX60L	1790.99	0.617045	0.103802	0.69074	0.224646	0.184568	0.762952	0.456563	0.0157098	0.318159	0.160654	0.360945	0.899835	0.231961	0.231651	1	-0.0640003	0.725031	1	0.295965	0.135607	1
ENSG00000126790		turquoise	-0.318936	0.0579696	L3HYPDH	434.77	-1.21731	0.0209216		0.065711	0.7644		-0.429533	0.0433749		-0.448047	0.0402692		-0.495429	0.019211	1	-0.513928	0.018379	1	0.0184975	0.929749	1
ENSG00000100906		turquoise	-0.315525	0.0608561	NFKBIA	9073.41	-0.28495	0.125599	0.731605	-0.195585	0.131942	0.697184	-0.251589	0.0985961	0.587433	-0.295562	0.0304579	0.484576	-0.0560106	0.721969	1	-0.0999846	0.483444	1	0.043974	0.786452	1
ENSG00000119408		turquoise	-0.31178	0.0641543	NEK6	1276.32	-0.61018	0.0987015		-0.114847	0.537115	0.909699	-0.372075	0.0654764		0.142607	0.457126		-0.257299	0.212301	1	0.257496	0.19178	1	-0.514804	0.0141571	1
ENSG00000072571		turquoise	0.307867	0.0677505	HMMR	22.6373	22.7432	0.00507124		0.0974584	0.183752		0.0787595	0.205988		0	1		-0.0187092	0.749996	1	-0.0787563	0.228855	1	0.0600498	0.279999	1
ENSG00000265241		turquoise	-0.306361	0.0691761	RBM8A	2494.16	-0.493406	0.0246673	0.431053	-0.161123	0.190418	0.766076	-0.42173	0.00373736	0.194473	-0.012847	0.921064	0.992643	-0.260635	0.083186	1	0.148286	0.274206	1	-0.408923	0.00844463	1
ENSG00000091009		turquoise	-0.305858	0.0696566	RBM27	866.261	-0.797484	0.0119115		0.0342908	0.85847		-0.496935	0.0159716		-0.447685	0.0234649		-0.531344	0.0114534	1	-0.482061	0.0173696	1	-0.0492855	0.817259	1
ENSG00000229127		turquoise	0.304007	0.0714506	AC007038.7	24.4176	10.0753	0.0228295		0.058244	0.489701		0.103078	0.150922		0.101523	0.204112		0.0448594	0.507818	1	0.0433027	0.565904	1	0.00155671	0.980652	1
ENSG00000177854		turquoise	-0.302802	0.0726372	TMEM187	76.3013	-22.7693	0.0299606		0.0974769	0.383965		-0.0124894	0.896439		0.0560269	0.598746		-0.110027	0.226135	1	-0.0414713	0.680888	1	-0.0685585	0.427509	1
ENSG00000156642	Yes	turquoise	-0.302401	0.073036	NPTN	1667.48	-0.500967	0.174722	0.788621	-0.232595	0.144317	0.71384	-0.385632	0.0326338	0.42969	-0.137105	0.409099	0.917416	-0.153068	0.409594	1	0.0954998	0.579595	1	-0.248571	0.19146	1
ENSG00000280670		turquoise	-0.29776	0.0777725	CCDC163P	112.691	-24.2878	0.0427839		-0.0130756	0.90214		-0.0786575	0.387345		-0.053303	0.597879		-0.0656192	0.446125	1	-0.0402495	0.673821	1	-0.0253709	0.75646	1
ENSG00000213906	Yes	turquoise	-0.297013	0.0785558	LTB4R2	732.425	-0.616535	0.128793		0.262329	0.21046		-0.250101	0.245066		0.0552922	0.794736		-0.512577	0.0183243	1	-0.207078	0.336925	1	-0.305507	0.162111	1
ENSG00000163635		turquoise	-0.296603	0.0789891	ATXN7	2080.86	-0.379283	0.255877	0.859493	-0.0528522	0.754208	0.962156	-0.258872	0.169933	0.658333	0.138636	0.429149	0.917971	-0.206062	0.287086	1	0.191513	0.291283	1	-0.39758	0.0446056	1
ENSG00000099821		turquoise	0.296287	0.0793244	POLRMT	1718.95	0.584384	0.0089542	0.289304	0.555753	0.0016835	0.145087	0.435818	0.0255425	0.386158	0.175025	0.339383	0.889712	-0.119938	0.548385	1	-0.380779	0.0439938	1	0.260845	0.200864	1
ENSG00000138029		turquoise	-0.29606	0.0795659	HADHB	3556.32	-0.448449	0.0580565	0.586208	-0.263461	0.0587166	0.566068	-0.379433	0.0190679	0.347552	-0.291504	0.0462234	0.547407	-0.115989	0.487463	1	-0.0280457	0.854085	1	-0.0879447	0.609065	1
ENSG00000225663		turquoise	0.292945	0.0829345	FAM195B	1336.54	0.509498	0.00801157		-0.167128	0.340417	0.859404	0.359902	0.063351		0.368838	0.0422068		0.527114	0.00795465	1	0.536038	0.00425751	1	-0.00892377	0.964889	1
ENSG00000211672		turquoise	0.292387	0.0835497	IGLV4-3	18.382	22.8047	0.00186025		0.124019	0.152787		0.12825	0.0825174		0.0277975	0.735405		0.00423284	0.951604	1	-0.0962767	0.214925	1	0.100514	0.128343	1
ENSG00000184787		turquoise	-0.292355	0.0835852	UBE2G2	4743.66	-0.256589	0.172822	0.787253	-0.0553778	0.675783	0.937374	-0.207207	0.181139	0.673902	0.153042	0.271506	0.856228	-0.151849	0.34279	1	0.208436	0.151501	1	-0.360288	0.0289622	1
ENSG00000207067		turquoise	-0.286095	0.0907312	SNORA72	26.3284	-8.08684	0.0478933		-0.0364301	0.635316		-0.0656628	0.314542		-0.0782402	0.282385		-0.0292496	0.634754	1	-0.0418341	0.542053	1	0.0125851	0.829113	1
ENSG00000134490		turquoise	-0.28575	0.091138	TMEM241	112.235	-11.077	0.00103409		0.0948961	0.503271		-0.0383742	0.754737		0.130865	0.334001		-0.133345	0.254542	1	0.0359865	0.780345	1	-0.169339	0.129745	1
ENSG00000071082		turquoise	0.285423	0.0915251	RPL31	20426.7	0.0910981	0.242201	0.852311	-0.0956478	0.185229	0.763517	0.0854437	0.334791	0.806346	-0.00291119	0.969753	0.996192	0.181096	0.049085	1	0.0927383	0.251123	1	0.0883582	0.354986	1
ENSG00000170310		turquoise	-0.284731	0.0923493	STX8	588.154	-0.555414	0.246461		0.00134926	0.995082		-0.153031	0.475068		0.269029	0.21877		-0.154451	0.469979	1	0.267758	0.221271	1	-0.42222	0.046942	1
ENSG00000101096		turquoise	-0.282234	0.0953679	NFATC2	2396.5	-0.266635	0.114023	0.705169	-0.0890899	0.467908	0.901116	-0.224342	0.122026	0.608093	0.135257	0.295526	0.86607	-0.135268	0.367367	1	0.224361	0.0971587	1	-0.359631	0.0202272	1
ENSG00000244026		turquoise	0.28204	0.0956052	FAM86DP	122.338	1.54417	0.222547		-0.0182922	0.88914		0.117941	0.297516		-0.0835036	0.504611		0.136303	0.205318	1	-0.0652497	0.583289	1	0.201561	0.0494291	1
ENSG00000115053		turquoise	-0.278958	0.0994409	NCL	16927.7	-0.138983	0.0129824	0.333165	-0.00880023	0.885277	0.982118	-0.135141	0.0726567	0.540098	-0.185639	0.00426869	0.244445	-0.126343	0.106409	1	-0.176841	0.00976077	1	0.0504981	0.534526	1
ENSG00000145386		turquoise	0.274547	0.105135	CCNA2	26.0167	23.3637	0.0469601		0.0440962	0.538137		0.0912181	0.133709		0.0504561	0.457042		0.0471479	0.410915	1	0.00636346	0.920704	1	0.0407861	0.45238	1
ENSG00000198574		turquoise	0.272507	0.107849	SH2D1B	31.0051	10.2914	0.00187915		0.011861	0.87521		0.0915424	0.153781		0.10397	0.146241		0.079727	0.187729	1	0.0921613	0.17183	1	-0.0124349	0.828226	1
ENSG00000065154		turquoise	-0.271013	0.109871	OAT	1273.05	-0.273632	0.160118		-0.1694	0.374459	0.875071	-0.158715	0.439177		0.234767	0.231183		0.010673	0.959309	1	0.404236	0.0446031	1	-0.393569	0.0639189	1
ENSG00000114982		turquoise	0.270071	0.111161	KANSL3	1228.57	0.419421	0.144822		-0.287547	0.156309	0.730556	0.205326	0.333506		-0.0717032	0.728962		0.492989	0.022049	1	0.215887	0.30629	1	0.277107	0.202541	1
ENSG00000198658		turquoise	-0.268811	0.112902	ABHD17AP1	48.1476	-1.72846	0.072279		-0.433773	0.0208709		-0.382698	0.0224996		-0.409318	0.02423		0.0510915	0.752476	1	0.0244631	0.88916	1	0.026629	0.864952	1
ENSG00000170340		turquoise	-0.268136	0.113845	B3GNT2	784.984	-0.14112	0.0099833		0.632544	0.00304222		0.0302743	0.888599		0.209797	0.330562		-0.602429	0.00561729	1	-0.422838	0.0523526	1	-0.179596	0.410179	1
ENSG00000214223		turquoise	-0.265349	0.117795	HNRNPA1P10	1180.45	-0.444596	0.130092		-0.458635	0.0202042	0.400423	-0.304136	0.14636		-0.184598	0.361266		0.154521	0.468004	1	0.274089	0.185187	1	-0.11957	0.579162	1
ENSG00000073910		turquoise	-0.26516	0.118067	FRY	1078.89	-0.298488	0.133496		-0.274604	0.1018	0.660247	-0.219623	0.242223		0.0956486	0.583295		0.0549773	0.775523	1	0.370298	0.0402671	1	-0.315324	0.109805	1
ENSG00000166527		turquoise	-0.264716	0.118708	CLEC4D	26.1903	-22.7642	0.0355345		0.0143428	0.827175		-0.0139186	0.802799		0.00344306	0.955853		-0.0282774	0.590224	1	-0.0109058	0.852294	1	-0.0173723	0.726601	1
ENSG00000272518		turquoise	-0.261967	0.122727	RP11-26J3.3	37.2451	-23.3328	0.0330504		-0.0429105	0.565211		-0.0662494	0.295992		-0.0779388	0.270184		-0.0233527	0.69602	1	-0.0350488	0.598817	1	0	1	1
ENSG00000223509		turquoise	-0.26185	0.122901	RP11-632K20.7	735.445	-0.701794	0.0581306		-0.131824	0.522472		-0.414932	0.0523599		-0.514656	0.0141492		-0.283185	0.190821	1	-0.382922	0.0727858	1	0.0997385	0.647616	1
ENSG00000175416		turquoise	-0.260164	0.125419	CLTB	1914.22	-0.0319172	0.112469	0.700793	0.136073	0.434493	0.891951	0.0101822	0.957912	0.990785	0.398247	0.0273201	0.46674	-0.125917	0.524246	1	0.262211	0.159586	1	-0.388133	0.054576	1
ENSG00000279141		turquoise	0.258011	0.12869	LINC01451	17.8148	1.48034	0.0405578		-0.0420193	0.516595		0.0258533	0.638048		-0.0362353	0.554648		0.0679111	0.189609	1	0	1	1	0.0621265	0.204686	1
ENSG00000167608		turquoise	-0.257043	0.130181	TMC4	40.5823	-10.1939	0.0291143		-0.0609309	0.585642		-0.0638064	0.50529		0.0596667	0.574559		-0.00287864	0.974689	1	0.120663	0.23064	1	-0.123546	0.151989	1
ENSG00000099246		turquoise	0.25638	0.131209	RAB18	1576.2	0.168538	0.174533	0.788621	-0.243421	0.164452	0.743856	0.108809	0.574266	0.913042	0.136953	0.450204	0.919085	0.352283	0.0758944	1	0.380425	0.0423019	1	-0.0281421	0.889527	1
ENSG00000258168		turquoise	0.25628	0.131366	RP11-588H23.3	23.6186	9.56599	0.0180059		0.097087	0.174772		0.069654	0.251585		0.0179745	0.790805		-0.027448	0.631737	1	-0.0791572	0.215059	1	0.0517115	0.340121	1
ENSG00000167005		turquoise	-0.255693	0.132282	NUDT21	2541.9	-0.0836243	0.093613	0.678951	0.31975	0.0440964	0.525829	-0.0334102	0.852788	0.971472	0.255352	0.123122	0.707283	-0.353207	0.0564383	1	-0.0644015	0.707892	1	-0.288809	0.128183	1
ENSG00000119979		turquoise	-0.254687	0.133864	FAM45A	489.33	-0.628013	0.016708		-0.26698	0.211465		-0.383161	0.0762739		-0.690328	0.0013783		-0.116217	0.593144	1	-0.423475	0.0521343	1	0.307264	0.158698	1
ENSG00000081307		turquoise	0.25454	0.134096	UBA5	891.057	0.587034	0.170688		-0.198012	0.351026		0.277963	0.198003		0.109241	0.610981		0.476106	0.028661	1	0.30733	0.157353	1	0.168779	0.439514	1
ENSG00000139083		turquoise	-0.251972	0.138203	ETV6	3806.55	-0.182411	0.0254788	0.433446	-0.266455	0.0187192	0.388594	-0.163268	0.226819	0.710136	0.0765347	0.522374	0.949333	0.103189	0.460736	1	0.343007	0.00621472	1	-0.239819	0.0971344	1
ENSG00000172809		turquoise	0.251887	0.138341	RPL38	9108.63	0.259747	0.120534	0.716027	0.155599	0.106969	0.667879	0.241264	0.0385645	0.442906	0.181365	0.076167	0.61808	0.0856704	0.478686	1	0.0257675	0.810332	1	0.0599033	0.632466	1
ENSG00000082196		turquoise	-0.251741	0.138577	C1QTNF3	60.3101	-10.6938	0.0301303		0.0557761	0.616156		-0.0567382	0.551727		-0.0378094	0.720803		-0.112576	0.212521	1	-0.0936358	0.349987	1	-0.0189415	0.825323	1
ENSG00000198134		turquoise	-0.251357	0.139199	RP11-267J23.4	96.8034	-0.809906	0.0952245		-0.143077	0.485844		-0.398434	0.0620391		0.127675	0.54116		-0.25545	0.237491	1	0.27081	0.203126	1	-0.526272	0.0157784	1
ENSG00000111666	Yes	turquoise	0.250712	0.140252	CHPT1	1712.07	0.0757103	0.102959	0.69074	-0.121906	0.524231	0.908807	0.00680042	0.973617	0.994604	-0.445865	0.0234467	0.46674	0.128738	0.539068	1	-0.324023	0.108512	1	0.452769	0.0333669	1
ENSG00000228696		turquoise	-0.250641	0.140367	ARL17B	57.1465	-22.9345	0.0135249		0.0986009	0.421165		-0.0585245	0.578714		-0.0375906	0.747434		-0.157211	0.116044	1	-0.136263	0.218613	1	-0.0209486	0.825866	1
ENSG00000182873		turquoise	-0.25023	0.141041	RP11-181G12.2	20.1909	-22.8648	0.045001		-0.10648	0.147403		-0.0965186	0.122109		-0.107644	0.122076		0.00996628	0.865538	1	-0.00116547	0.985827	1	0.0111322	0.841654	1
ENSG00000163682		turquoise	-0.249308	0.14256	RPL9	1639.56	-0.762396	8.80519e-05	0.032426	-0.638224	0.000414473	0.0620401	-0.526552	0.00785623	0.251119	0.0957887	0.608007	0.964295	0.111663	0.581655	1	0.734121	0.000137333	0.834815	-0.622467	0.00257629	1
ENSG00000119943		turquoise	-0.249219	0.142707	PYROXD2	423.636	-0.904911	0.213612		-0.0924785	0.673004		-0.281516	0.187351		0.144843	0.507752		-0.189129	0.374051	1	0.237392	0.277317	1	-0.426534	0.0434902	1
ENSG00000254929		turquoise	0.248283	0.144263	RP11-144G6.12	15.7268	21.9745	0.0222511		0.00952784	0.885917		0.0561653	0.318879		0.0927066	0.14038		0.0466645	0.37942	1	0.0832263	0.1599	1	-0.0365634	0.466738	1
ENSG00000160172		turquoise	-0.243184	0.152957	FAM86C2P	31.6387	-21.9702	0.0435948		0.0592868	0.434006		-0.0165987	0.796595		-0.0285681	0.690699		-0.0759283	0.211183	1	-0.0879046	0.193988	1	0.0119768	0.835006	1
ENSG00000196550		turquoise	-0.241641	0.15566	FAM72A	43.6331	-22.8908	0.0228937		0.0365215	0.685941		-0.048935	0.524935		-0.0656804	0.443319		-0.0855046	0.239545	1	-0.102259	0.206189	1	0.0167556	0.80794	1
ENSG00000109111		turquoise	-0.240996	0.156801	SUPT6H	4256.64	-0.264493	0.193866	0.813872	-0.253782	0.0480832	0.533003	-0.233104	0.122318	0.608871	-0.165961	0.219294	0.817785	0.0206755	0.894522	1	0.087826	0.533907	1	-0.067151	0.676289	1
ENSG00000125870		turquoise	0.240556	0.157582	SNRPB2	1391.82	0.310772	0.100971	0.690409	-0.0506861	0.765665	0.962503	0.233145	0.218867	0.701965	0.337296	0.0560396	0.566457	0.283872	0.144508	1	0.388032	0.0336168	1	-0.10416	0.600448	1
ENSG00000269893		turquoise	0.240041	0.1585	SNHG8	764.539	0.607108	0.174158		0.0717494	0.740176		0.256215	0.235777		-0.223416	0.304619		0.184528	0.39466	1	-0.295256	0.177822	1	0.479795	0.0267534	1
ENSG00000272053		turquoise	-0.237863	0.162427	RP11-367G6.3	79.383	-10.9093	0.0489834		0.0383584	0.7156		-0.036171	0.687942		0.0188706	0.850377		-0.0745712	0.381596	1	-0.0194981	0.836779	1	-0.0550754	0.496236	1
ENSG00000164440		turquoise	0.237251	0.163543	TXLNB	58.6952	11.5889	1.61368e-05		0.225968	0.052988		0.180414	0.0718535		0.141727	0.202157		-0.0455766	0.63152	1	-0.0842844	0.42362	1	0.0387095	0.668456	1
ENSG00000141873		turquoise	-0.235489	0.166786	SLC39A3	842.71	-0.15458	0.12212		0.241666	0.212495		-0.0396258	0.848336		0.384349	0.05335		-0.281359	0.182358	1	0.14271	0.483924	1	-0.424077	0.0475022	1
ENSG00000171222		turquoise	0.234934	0.167818	SCAND1	1729.38	0.628761	0.0834686	0.666926	0.276526	0.121386	0.686324	0.458047	0.0196741	0.347552	0.367898	0.0463564	0.547407	0.181559	0.366387	1	0.091386	0.63141	1	0.0901745	0.660025	1
ENSG00000136807		turquoise	-0.234674	0.168302	CDK9	2091.82	-0.274613	0.0868415	0.667624	-0.309832	0.0564858	0.559741	-0.210102	0.251433	0.730268	0.0886336	0.600243	0.961667	0.0997335	0.596328	1	0.398511	0.0230837	1	-0.298781	0.121331	1
ENSG00000084072		turquoise	0.23399	0.169582	PPIE	1156.78	0.388504	0.116239		0.449822	0.0167208	0.37876	0.290046	0.153711		0.278184	0.150717		-0.159796	0.4412	1	-0.171662	0.388148	1	0.0118664	0.955138	1
ENSG00000108587		turquoise	0.230682	0.175868	GOSR1	1220.81	-0.0681545	0.185809		-0.114507	0.514519	0.90783	-0.0758689	0.696		-0.392671	0.0309692		0.0386481	0.845953	1	-0.278207	0.138807	1	0.316859	0.118698	1
ENSG00000075131		turquoise	-0.230262	0.17668	TIPIN	81.3259	-23.5682	0.0365976		-0.00541646	0.961602		-0.060451	0.530759		0.0172069	0.872241		-0.0550663	0.54671	1	0.0226354	0.823266	1	-0.077705	0.370959	1
ENSG00000254463		turquoise	-0.226939	0.183182	RP11-484D2.3	37.265	-2.87358	0.0450744		-0.100398	0.144588		-0.0787186	0.177787		-0.0947229	0.146074		0.0216919	0.693538	1	0.0056782	0.926301	1	0.0160144	0.758544	1
ENSG00000167670		turquoise	-0.223979	0.189114	CHAF1A	674.866	-0.389383	0.134925		0.321925	0.110816		-0.167074	0.430349		0.0813936	0.692948		-0.489117	0.0228711	1	-0.240574	0.252655	1	-0.248549	0.252454	1
ENSG00000228224		turquoise	-0.221366	0.194463	NACAP1	29.1602	-4.12769	0.0454144		0.19007	0.210142		-0.0642737	0.626241		0.00325942	0.982086		-0.254476	0.043518	1	-0.186901	0.177678	1	-0.0675786	0.57521	1
ENSG00000107521		turquoise	0.221268	0.194667	HPS1	5638.88	0.0933022	0.10497	0.69074	-0.24508	0.0414961	0.523348	0.0727925	0.60916	0.917661	-0.0226621	0.858098	0.988051	0.317894	0.0309346	1	0.22243	0.0935618	1	0.0954652	0.530276	1
ENSG00000116095		turquoise	0.220172	0.196943	PLEKHA3	668.084	0.347122	0.114921		0.0631716	0.758889		0.16233	0.447541		-0.341114	0.103489		0.0991932	0.646644	1	-0.404384	0.0578642	1	0.503588	0.0209774	1
ENSG00000119801		turquoise	-0.218873	0.199665	YPEL5	5512.95	-0.441758	0.00228158	0.15764	-0.496141	0.000393159	0.0604402	-0.384865	0.017806	0.339344	-0.357927	0.0147786	0.398354	0.11128	0.506742	1	0.138224	0.366602	1	-0.0269444	0.875891	1
ENSG00000118257	Yes	turquoise	-0.218605	0.200228	NRP2	35.589	-7.76963	0.0200881		0.0245985	0.729768		-0.0162957	0.787529		-0.00532143	0.93711		-0.0409172	0.472787	1	-0.0299365	0.637569	1	-0.0109812	0.838696	1
ENSG00000248121		turquoise	-0.216382	0.204957	SMURF2P1	17.0125	-16.1536	0.0179171		0.113642	0.130885		0.0294943	0.64444		0.0540609	0.44811		-0.0841948	0.162425	1	-0.0596135	0.374889	1	-0.0245823	0.666622	1
ENSG00000143198		turquoise	-0.215808	0.206191	MGST3	812.625	-0.155636	0.0594492		0.105784	0.629401		0.0334343	0.87437		0.514082	0.0183825		-0.0723888	0.730428	1	0.408421	0.0599985	1	-0.480822	0.0208232	1
ENSG00000149932	Yes	turquoise	0.214848	0.208264	TMEM219	2249.99	0.482799	0.0472543	0.539611	0.381787	0.01946	0.395562	0.387612	0.0351667	0.436463	0.385358	0.0234764	0.46674	0.00583357	0.975383	1	0.00357343	0.983828	1	0.00226057	0.990685	1
ENSG00000149418		turquoise	-0.214087	0.20992	ST14	4758.82	-0.0322019	0.13439	0.746963	0.272315	0.0342359	0.490666	-0.0151713	0.920029	0.98543	0.104612	0.439576	0.918771	-0.287509	0.0656125	1	-0.167713	0.235608	1	-0.119798	0.45701	1
ENSG00000175792		turquoise	0.213767	0.210619	RUVBL1	754.964	0.622935	0.00908982		-0.055622	0.787616		0.366555	0.0867354		0.554432	0.00828699		0.42228	0.0511973	1	0.610186	0.00428419	1	-0.187909	0.389238	1
ENSG00000240914		turquoise	-0.213367	0.211493	RPL15P2	10.4038	-5.90371	0.00145535		0.0158027	0.918157		-0.00374001	0.977645		0.286338	0.053275		-0.0195583	0.878105	1	0.270665	0.0558663	1	-0.290234	0.0181001	1
ENSG00000275063		turquoise	0.212743	0.212864	AC233755.1	33.6134	9.88489	0.0264542		0.0968894	0.232071		0.087265	0.205753		0.0572134	0.456575		-0.00962963	0.882355	1	-0.039698	0.583898	1	0.0300696	0.625698	1
ENSG00000132294		turquoise	0.209152	0.220869	EFR3A	2195.36	0.389825	0.116976	0.709916	0.406999	0.0259908	0.447987	0.299579	0.133409	0.621263	0.357275	0.0583626	0.566695	-0.107432	0.598554	1	-0.0497283	0.798066	1	-0.057704	0.781277	1
ENSG00000135940		turquoise	0.205192	0.229933	COX5B	2399.26	0.267214	0.130648	0.742711	0.347246	0.0285457	0.461273	0.228162	0.204469	0.692654	0.30156	0.068229	0.599305	-0.119095	0.519543	1	-0.0456894	0.790083	1	-0.0734062	0.698651	1
ENSG00000063660	Yes	turquoise	-0.204251	0.232125	GPC1	6.11441	0.17073	0.0269149		0.0495162	0.342031		0.0147345	0.738443		0.0314762	0.523154		-0.0348014	0.402072	1	-0.0180501	0.697139	1	-0.0167521	0.669634	1
ENSG00000100207		turquoise	-0.201403	0.23884	TCF20	1985.67	-0.523428	0.0318459	0.473576	-0.412728	0.0115147	0.327477	-0.402969	0.028508	0.41101	-0.0963617	0.570868	0.952512	0.00974524	0.958892	1	0.316402	0.0726696	1	-0.30666	0.113231	1
ENSG00000132768		turquoise	0.201277	0.239142	DPH2	913.503	0.628767	0.0330913		0.191701	0.314762		0.433514	0.0345711		0.52681	0.00720392		0.241864	0.247492	1	0.335166	0.0957696	1	-0.0933029	0.660427	1
ENSG00000177447		turquoise	-0.200785	0.240315	CBX3P1	18.9195	-21.4529	0.0160524		-0.0988178	0.230766		-0.0758417	0.279678		-0.032248	0.679958		0.0229892	0.728376	1	0.0666085	0.366329	1	-0.0436212	0.48676	1
ENSG00000260942		turquoise	-0.198958	0.244711	CAPN10-AS1	26.5791	-21.1728	0.018621		0.117817	0.123702		0.0116243	0.858161		-0.000717027	0.99211		-0.106252	0.0832575	1	-0.118601	0.0827512	1	0	1	1
ENSG00000186272		turquoise	-0.198448	0.245946	ZNF17	99.1919	-7.84825	0.0209324		0.10546	0.413186		-0.0628565	0.571461		-0.0277563	0.821257		-0.168408	0.110562	1	-0.133285	0.253453	1	-0.0351239	0.726879	1
ENSG00000100242		turquoise	0.196433	0.250871	SUN2	11683.4	0.0578207	0.133125	0.744145	0.0480232	0.598995	0.922227	0.0511446	0.644238	0.92963	-0.17132	0.0769459	0.618226	0.00312323	0.978315	1	-0.219351	0.0311051	1	0.222475	0.0617295	1
ENSG00000267096		turquoise	-0.195645	0.252816	CTD-2537I9.13	68.6103	-22.1638	0.0474247		0.0783249	0.441578		0.0111477	0.898023		0.108626	0.261172		-0.0672154	0.413978	1	0.0303171	0.740168	1	-0.0975366	0.211778	1
ENSG00000005486		turquoise	0.195514	0.253141	RHBDD2	1284.44	0.148768	0.152544		-0.088848	0.651527	0.933364	0.0511922	0.806456		-0.396352	0.0492513		0.140077	0.509832	1	-0.30757	0.135946	1	0.447655	0.037592	1
ENSG00000104953		turquoise	0.194616	0.255369	TLE6	18.3183	9.175	0.0240998		0.119226	0.143492		0.0923216	0.182967		0.032076	0.677972		-0.0269135	0.680747	1	-0.0871817	0.231462	1	0.0602709	0.330732	1
ENSG00000281445		turquoise	-0.194599	0.255413	PCBP2-OT1	18.8903	-9.89327	0.0168346		-0.0904087	0.235921		-0.0699866	0.280319		-0.0379141	0.599874		0	1	1	0.0525249	0.440723	1	-0.0320927	0.579323	1
ENSG00000163435		turquoise	0.194563	0.255501	ELF3	67.0116	0.137182	0.0358388		-0.0230648	0.82796		-0.0154593	0.86482		-0.102377	0.310061		0.00760945	0.929452	1	-0.0793583	0.405643	1	0.0869716	0.286706	1
ENSG00000266402		turquoise	-0.191575	0.263016	RP11-329L6.2	17.3591	-15.9793	0.0343819		0.0481328	0.468856		0.022478	0.690099		0.0802565	0.202102		-0.0256697	0.628916	1	0.0321413	0.587543	1	-0.0578135	0.250068	1
ENSG00000188868		turquoise	0.189385	0.268614	ZNF563	26.555	10.089	0.0212372		0.0819329	0.330375		0.118029	0.0994777		0.0615836	0.440321		0.036116	0.593292	1	-0.0203607	0.786853	1	0.0564791	0.378109	1
ENSG00000226699		turquoise	-0.188582	0.270689	RP11-122K13.7	21.5983	-21.8275	0.0324886		-0.0138296	0.861257		-0.0576917	0.391186		-0.0709467	0.344097		-0.0438873	0.489254	1	-0.0571498	0.418957	1	0	1	1
ENSG00000279689		turquoise	-0.188515	0.270862	RP11-574K11.32	22.8931	-21.8317	0.0323151		0.0497189	0.547618		-0.0308383	0.661122		-0.0451851	0.564272		-0.0806022	0.224702	1	-0.0949572	0.19903	1	0.0143556	0.819461	1
ENSG00000101846	Yes	turquoise	-0.187576	0.2733	STS	517.037	-0.640724	0.167043		-0.475188	0.0300597		-0.287706	0.171659		-0.159825	0.462624		0.187541	0.369227	1	0.315472	0.144924	1	-0.127935	0.535757	1
ENSG00000186235		turquoise	0.185956	0.277538	AC016757.3	27.0886	9.20877	0.00666839		0.0948665	0.318146		0.106754	0.187932		0.139735	0.121326		0.0118936	0.876648	1	0.044893	0.598319	1	-0.0330008	0.649828	1
ENSG00000230084		turquoise	0.185354	0.279126	RP4-613B23.1	29.4105	22.7836	0.0257376		0.032014	0.671154		0.0739807	0.248261		0.101196	0.156634		0.0419903	0.487082	1	0.0692205	0.303988	1	-0.0272313	0.634105	1
ENSG00000229204		turquoise	-0.184629	0.281043	PTGES3P3	0.838845	2.34136	0.368631		0.204535	0.0226952		0.049042	0.52059		0.0350402	0.680336		-0.15558	0.0311398	1	-0.169589	0.0349009	1	0.0140102	0.837598	1
ENSG00000259408		turquoise	-0.182918	0.285604	RP11-3D4.3	19.959	-6.95479	0.0419757		0.00247072	0.975897		-0.0528036	0.447822		-0.0673351	0.385013		-0.0553054	0.399478	1	-0.0698451	0.339412	1	0.0145403	0.815121	1
ENSG00000137103	Yes	turquoise	-0.181723	0.288816	TMEM8B	1127.76	0.0635921	0.0971844		0.0355913	0.851759	0.976608	0.0724233	0.723854		0.435415	0.0261795		0.0368322	0.860124	1	0.399892	0.0466723	1	-0.363065	0.0871928	1
ENSG00000213036		turquoise	-0.180872	0.291118	RP11-365D23.4	1.2877	-6.33344	0.0689375		-0.198715	0.0497045		-0.173344	0.0447225		-0.171792	0.0740799		0.0253848	0.755331	1	0.0269386	0.766448	1	-0.00155403	0.983968	1
ENSG00000085274		turquoise	0.179749	0.294176	MYNN	537.635	0.68637	0.0555262		0.466415	0.0323583		0.257954	0.212842		-0.0483587	0.822565		-0.208516	0.308495	1	-0.514952	0.0159476	1	0.306446	0.128992	1
ENSG00000075539		turquoise	0.177648	0.299948	FRYL	2240.53	-0.035639	0.236547	0.851227	-0.345478	0.0485259	0.533003	-0.0493988	0.798724	0.968857	-0.0886198	0.625227	0.968594	0.296123	0.135752	1	0.256892	0.17043	1	0.0392315	0.846492	1
ENSG00000234745		turquoise	0.17729	0.30094	HLA-B	90431.9	0.110911	0.083894	0.666926	0.0799308	0.300842	0.846207	0.10394	0.271519	0.753752	-0.115108	0.160928	0.766122	0.0240117	0.806761	1	-0.195044	0.0239403	1	0.219056	0.0315124	1
ENSG00000111215		turquoise	-0.174195	0.309591	PRR4	46.2899	-10.8342	0.0147511		-0.0153919	0.888383		-0.106531	0.256674		-0.122231	0.241029		-0.0911908	0.305222	1	-0.1069	0.278781	1	0.0157094	0.852533	1
ENSG00000269653		turquoise	0.173537	0.311451	CTB-102L5.7	20.9505	1.76795	0.0238286		-0.0448585			0.0431842			-0.0380139			0.0880906			0.00684842			0.0812473
ENSG00000260196		turquoise	-0.172514	0.314356	RP1-239B22.5	19.0931	-22.7993	0.0418433		-0.0608683	0.243283		-0.0516401	0.242413		-0.0571785	0.246594		0	1	1	0	1	1	0	1	1
ENSG00000260233		turquoise	0.172454	0.314527	SSSCA1-AS1	52.851	23.7226	0.0293689		0.0634967	0.386358		0.0733218	0.238978		0.0582766	0.401313		0.00983052	0.867009	1	-0.00522305	0.936382	1	0.0150542	0.78649	1
ENSG00000140839		turquoise	-0.172378	0.314744	CLEC18B	22.6961	-4.85922	0.0106718		0.146397	0.0975191		0.0094278	0.900305		-0.00785348	0.925326		-0.137046	0.0538087	1	-0.154337	0.0510356	1	0.0172919	0.797416	1
ENSG00000182983		turquoise	0.17189	0.316135	ZNF662	33.7371	23.041	0.0482392		0.0537246	0.451098		0.0673467	0.265942		0.0628647	0.351848		0.0136296	0.811224	1	0.00914512	0.885704	1	0.0044847	0.933832	1
ENSG00000113356		turquoise	-0.170935	0.318873	POLR3G	20.6818	-14.1198	0.0276452		0.0525641	0.343572		0.0164833	0.725896		0.0387913	0.460064		-0.0361014	0.414711	1	-0.0137805	0.78033	1	-0.0223219	0.593797	1
ENSG00000174680		turquoise	0.170836	0.319158	GRIK1-AS1	18.1055	22.804	0.0487135		0	1		0.0458384	0.330923		0.0574467	0.275244		0.0395372	0.373036	1	0.051152	0.301867	1	-0.0116153	0.781971	1
ENSG00000234093		turquoise	-0.170661	0.319662	RPS15AP11	15.2551	-1.24135	0.0790454		0.189757	0.350308		-0.193805	0.293494		-0.231793	0.240822		-0.383733	0.0328612	1	-0.421731	0.02871	1	0.0379987	0.827739	1
ENSG00000272899		turquoise	-0.169471	0.323097	RP11-309L24.4	20.9393	-21.1003	0.0489523		0.0837279	0.274547		-0.00543947	0.933435		-0.017609	0.808362		-0.0892175	0.146339	1	-0.101394	0.138504	1	0.012177	0.83416	1
ENSG00000144580		turquoise	0.168892	0.324777	RQCD1	1467.37	0.188815	0.188868	0.810129	-0.179157	0.352327	0.86524	0.118229	0.566759	0.911508	0.247828	0.210263	0.809746	0.297443	0.157237	1	0.427061	0.0352855	1	-0.129619	0.543555	1
ENSG00000170522		turquoise	-0.166519	0.331722	ELOVL6	21.3488	-15.7958	0.00282885		0.164797	0.0345316		0.0333213	0.61511		0.0206995	0.779321		-0.131549	0.035348	1	-0.144177	0.0384621	1	0.0126292	0.831068	1
ENSG00000261423		turquoise	-0.164296	0.338309	RP11-1007O24.3	52.2427	-24.2976	0.0113845		0.0342336	0.675191		-0.0372797	0.591694		-0.0514742	0.506241		-0.0715535	0.27524	1	-0.085756	0.240371	1	0	1	1
ENSG00000175356		turquoise	-0.164155	0.338729	SCUBE2	23.7626	-23.0892	0.0458362		-0.11713	0.124004		-0.105027	0.104605		-0.116608	0.106048		0.0121092	0.842708	1	0.000521927	0.993877	1	0.0115878	0.84107	1
ENSG00000197721		turquoise	-0.163976	0.339263	CR1L	5.37771	-8.50608	0.0174368		-0.121354	0.129349		-0.103047	0.129694		-0.0977207	0.197559		0.0183173	0.775114	1	0.0236471	0.740757	1	-0.00533018	0.930067	1
ENSG00000278662		turquoise	-0.159781	0.351932	GOLGA6L10	9.42939	-4.9548	0.000612315		-0.0999438	0.174537		-0.0666773	0.285816		-0.0820195	0.239505		0.0332856	0.571646	1	0.0179348	0.784738	1	0.0153515	0.782902	1
ENSG00000066135		turquoise	0.157952	0.357543	KDM4A	1465.6	0.415099	0.00452477	0.220878	0.0291678	0.870658	0.980421	0.311888	0.113087	0.601685	0.584705	0.00159538	0.155202	0.282766	0.160437	1	0.555616	0.00363165	1	-0.272853	0.184038	1
ENSG00000214357		turquoise	0.156991	0.360511	NEURL1B	36.0737	21.9374	0.000930587		0.185276	0.0679042		0.099344	0.251957		0.111888	0.245703		-0.0859782	0.294578	1	-0.0734266	0.420476	1	-0.0125522	0.871937	1
ENSG00000251143		turquoise	-0.156042	0.363459	RP11-849H4.4	26.9923	-22.1943	0.0433241		0.0594012	0.415408		-0.0129827	0.834006		-0.0241225	0.726971		-0.0724245	0.214954	1	-0.0835706	0.199281	1	0	1	1
ENSG00000173276		turquoise	-0.15567	0.364618	ZBTB21	1038.49	-0.516068	0.0909552		-0.502229	0.0129634	0.342957	-0.340425	0.108244		-0.219077	0.288271		0.161828	0.451728	1	0.283209	0.178475	1	-0.121384	0.57634	1
ENSG00000088325		turquoise	-0.154152	0.369371	TPX2	23.5023	-0.760385	0.0120061		0.136473	0.125577		0.0447485	0.5555		0.110885	0.189485		-0.0917762	0.200457	1	-0.0256017	0.748295	1	-0.0661774	0.330174	1
ENSG00000136235	Yes	turquoise	-0.152962	0.373123	GPNMB	26.479	-8.29794	0.012596		-0.126681	0.138332		-0.122995	0.0910036		-0.13887	0.0866504		0.00368759	0.957187	1	-0.0121962	0.873295	1	0.0158845	0.807226	1
ENSG00000213920		turquoise	-0.15237	0.374998	MDP1	26.1783	14.514	0.000348397		0.164126	0.0922654		0.0559906	0.501038		0.142169	0.124499		-0.108197	0.169049	1	-0.0219682	0.801698	1	-0.0862319	0.248025	1
ENSG00000163554		turquoise	-0.150755	0.380139	SPTA1	27.1786	-0.955152	3.47432e-05		0.212343	0.0149659		0.0434249	0.559012		0.027045	0.743818		-0.169014	0.01602	1	-0.185403	0.0176211	1	0	1	1
ENSG00000152484		turquoise	0.150559	0.380768	USP12	1712.14	-0.107604	0.156473	0.772168	-0.0601451	0.742462	0.958618	-0.100206	0.615963	0.920653	-0.415864	0.0277638	0.46674	-0.0400633	0.844477	1	-0.355778	0.0675237	1	0.315719	0.129043	1
ENSG00000257674		turquoise	-0.148748	0.386587	RP11-76E16.2	15.7262	-2.48712	0.0134986		-0.0738821	0.431627		0.0281807	0.725015		-0.0729111	0.413445		0.102119	0.177128	1	0.000971241	0.990793	1	0.101153	0.158667	1
ENSG00000167748		turquoise	-0.147583	0.390361	KLK1	13.2044	-14.1082	0.00349625		0.175251	0.0511789		0.0460644	0.547435		0.0792477	0.352562		-0.129235	0.073942	1	-0.0960384	0.232792	1	-0.0332052	0.628192	1
ENSG00000116774		turquoise	-0.147264	0.391397	OLFML3	22.1075	0.682989	0.00283513		0.173347	0.0628149		0.0502182	0.527323		0.102013	0.248552		-0.123198	0.100784	1	-0.0713721	0.392754	1	-0.0518285	0.46664	1
ENSG00000181817		turquoise	-0.147184	0.391656	LSM10	1299.07	-0.0810647	0.225507		0.108722	0.566178	0.916269	-0.0633629	0.756519		-0.302551	0.120795		-0.172111	0.408986	1	-0.411345	0.039979	1	0.239237	0.258678	1
ENSG00000010327	Yes	turquoise	-0.145351	0.397647	STAB1	3189.43	-0.251852	0.172433	0.787253	-0.430868	0.0333061	0.489284	-0.177951	0.401512	0.84454	-0.0623902	0.762648	0.973822	0.252967	0.239718	1	0.368554	0.0802917	1	-0.115589	0.594837	1
ENSG00000100804		turquoise	0.144941	0.398994	PSMB5	450.452	0.193852	0.204596		0.211174	0.325749		0.0505093	0.801726		-0.218671	0.301211		-0.160716	0.416762	1	-0.430013	0.0391145	1	0.269306	0.165655	1
ENSG00000093144		turquoise	0.144872	0.399218	ECHDC1	2020.8	0.301146	0.185073	0.809519	0.22677	0.198174	0.772828	0.238976	0.219451	0.702967	0.392994	0.0312798	0.484745	0.0122099	0.951155	1	0.166248	0.377536	1	-0.154039	0.448909	1
ENSG00000087586		turquoise	-0.143958	0.402234	AURKA	25.2519	16.2143	0.0280603		0.0412362	0.553643		0.027365	0.64335		0.106339	0.106776		-0.0138796	0.803219	1	0.0651383	0.294311	1	-0.0790214	0.133902	1
ENSG00000243071		turquoise	-0.143161	0.40487	RP11-613M5.2	5.26719	-2.98175	0.0758121		-0.253553	0.0366544		-0.221279	0.0337606		-0.255879	0.0267696		0.0322905	0.743752	1	-0.00232902	0.983024	1	0.034621	0.712655	1
ENSG00000260244		turquoise	-0.14307	0.405173	RP11-588K22.2	18.4397	-12.1765	0.0140373		0.112685	0.12491		0	1		0.0530159	0.445975		-0.0825976	0.160177	1	-0.0597024	0.362467	1	-0.0228962	0.680897	1
ENSG00000056097		turquoise	0.142877	0.405813	ZFR	2934.74	0.106558	0.0680467	0.628802	-0.0925321	0.507687	0.90783	0.0704342	0.663974	0.935838	-0.33834	0.0209815	0.459558	0.162987	0.329985	1	-0.245831	0.107712	1	0.408821	0.0176253	1
ENSG00000173208		turquoise	0.141926	0.408977	ABCD2	35.8666	9.63856	0.00103028		0.199511	0.0581013		0.133582	0.13799		0.0969306	0.33257		-0.0659637	0.438991	1	-0.102635	0.278222	1	0.0366727	0.65051	1
ENSG00000196935		turquoise	-0.140875	0.41249	SRGAP1	35.1666	0.49094	0.00526131		0.18758	0.0375885		0.0466069	0.544349		0.0679448	0.427214		-0.141052	0.0520796	1	-0.119701	0.138499	1	-0.0213526	0.756448	1
ENSG00000172594		turquoise	-0.140444	0.413937	SMPDL3A	21.1342	-10.5582	0.00031587		-0.189977	0.0340064		-0.161313	0.0346356		-0.17836	0.0358862		0.0286807	0.690804	1	0.0116234	0.884826	1	0.017058	0.802955	1
ENSG00000166578		turquoise	0.139454	0.417267	IQCD	33.7941	7.67713	0.0149379		0.166725	0.0666457		0.0890982	0.250171		0.0522105	0.544902		-0.0776688	0.288606	1	-0.114578	0.159431	1	0.0369103	0.594816	1
ENSG00000141655	Yes	turquoise	-0.139419	0.417387	TNFRSF11A	24.2354	3.95704	6.2155e-05		0.368132	0.00158292		0.0886456	0.375235		0.0839107	0.449083		-0.279641	0.00318343	1	-0.284376	0.0068178	1	0.00473503	0.95811	1
ENSG00000181885	Yes	turquoise	0.13841	0.420797	CLDN7	45.637	0.214103	0.0216965		-0.113145	0.210864		-0.0243616	0.751942		-0.0795203	0.353966		0.088835	0.222335	1	0.033645	0.677862	1	0.0551922	0.423929	1
ENSG00000080007		turquoise	0.136994	0.425612	DDX43	7.5341	9.84725	0.0342358		0.048646			0.0773171			0.0134014			0.0286869			-0.0352649			0.0639546
ENSG00000254521	Yes	turquoise	-0.134733	0.433361	SIGLEC12	22.9326	-8.1532	0.018413		-0.0300318	0.627206		-0.0172705	0.741869		0.0306874	0.600074		0.0127685	0.795976	1	0.0607535	0.270219	1	-0.0479869	0.304318	1
ENSG00000262050		turquoise	0.134429	0.434411	RP11-74E22.3	12.7317	21.6482	0.0191304		0.0959169	0.15891		0.0549425	0.341677		0	1		-0.040997	0.451513	1	-0.0799124	0.188207	1	0.0389172	0.450098	1
ENSG00000075643		turquoise	-0.134264	0.434978	MOCOS	28.9619	-19.9121	0.0214406		0.111607	0.136889		0.0104743	0.869495		-0.00135603	0.98478		-0.101189	0.0923231	1	-0.113026	0.0916118	1	0	1	1
ENSG00000008324		turquoise	-0.132476	0.441178	SS18L2	419.23	0.329023	0.249634		0.169901	0.428078		0.158609	0.428512		0.423202	0.0448028		-0.0112989	0.954262	1	0.25339	0.222514	1	-0.264696	0.170853	1
ENSG00000182568		turquoise	-0.131525	0.444491	SATB1	3132.94	-0.200607	0.0923878	0.678951	0.0315672	0.790222	0.96766	-0.177843	0.206582	0.695833	-0.255055	0.0416467	0.527391	-0.209424	0.150613	1	-0.286638	0.028715	1	0.0772143	0.607962	1
ENSG00000258017		turquoise	-0.129971	0.449938	RP11-386G11.10	12.9912	14.7114	0.0237574		0.0883452	0.241906		0.0322894	0.614695		0.0870559	0.223548		-0.0560881	0.35381	1	-0.00129005	0.984734	1	-0.0548005	0.338691	1
ENSG00000058056		turquoise	-0.128667	0.454535	USP13	619.413	-0.564337	0.209363		-0.295547	0.176107		-0.30333	0.158145		-0.452947	0.0383426		-0.00779231	0.971053	1	-0.157456	0.472525	1	0.149667	0.483788	1
ENSG00000167766		turquoise	-0.12699	0.460485	ZNF83	1921.48	-0.696433	0.226633	0.838112	-0.135648	0.47847	0.906009	-0.428075	0.0373432	0.442092	-0.10727	0.585519	0.957325	-0.292505	0.162821	1	0.0283835	0.88817	1	-0.320895	0.13153	1
ENSG00000189014		turquoise	0.126446	0.462427	FAM35DP	21.9201	6.16218	0.0279239		0.0566881			0.0657138			0.0510935			0.00903063			-0.00559772			0.014629
ENSG00000173585	Yes	turquoise	0.126419	0.462522	CCR9	25.2581	9.51101	0.00894978		0.0593012			0.0814432			0.0153054			0.0221541			-0.0440211			0.0661781
ENSG00000267506		turquoise	-0.126143	0.463508	RP11-13K12.1	13.1421	0.170732	0.00390627		0	1		0	1		0.113583	0.0586981		0	1	1	0.105332	0.0626135	1	-0.0914711	0.0565443	1
ENSG00000234130		turquoise	-0.125547	0.465641	RP13-88F20.1	3.10263	-1.47449	0.0442822		0.251551	0.0172392		0.0466001	0.605227		0.0417726	0.676834		-0.205063	0.0164	1	-0.209892	0.0270891	1	0.00482913	0.952481	1
ENSG00000147854		turquoise	0.12393	0.471449	UHRF2	2509.72	-0.0816501	0.0293362	0.452745	-0.00350323	0.980374	0.994787	-0.0805304	0.625094	0.923961	-0.415254	0.00542575	0.272812	-0.0770305	0.650448	1	-0.411787	0.00813816	1	0.334759	0.0556706	1
ENSG00000169750		turquoise	-0.123663	0.472412	RAC3	27.5307	-14.0495	0.00763197		0.0795504	0.3118		0.0347251	0.603557		0.111795	0.133641		-0.0448511	0.477058	1	0.0322617	0.646206	1	-0.0771164	0.196784	1
ENSG00000243566	Yes	turquoise	-0.123079	0.474523	UPK3B	24.5148	0.170727	0.000722246		0.0549765	0.519754		0	1		0.174146	0.0315315		-0.0133176	0.846147	1	0.119234	0.118706	1	-0.132558	0.0415695	1
ENSG00000182118		turquoise	-0.122126	0.477979	FAM89A	20.6981	-14.1418	0.0281159		0.0645749	0.361391		0.027661	0.645176		0.0880005	0.189084		-0.0369352	0.514191	1	0.0234383	0.71045	1	-0.0603762	0.259939	1
ENSG00000256576		turquoise	0.121764	0.479292	RP13-977J11.2	41.662	22.0085	0.00669287		0.153132	0.0647784		0.0609103	0.387984		0.0399536	0.611255		-0.0922722	0.165827	1	-0.113241	0.126735	1	0.0209697	0.7396	1
ENSG00000100526		turquoise	-0.12057	0.483645	CDKN3	12.0102	-14.1452	0.0118194		0.0088132	0.892719		0.023292	0.674375		0.119941	0.0525578		0.0144868	0.781489	1	0.111189	0.0563468	1	-0.0967075	0.050364	1
ENSG00000091536		turquoise	-0.12	0.485731	MYO15A	39.906	-6.37861	0.0161359		-0.176588	0.115549		-0.134144	0.163069		-0.0382155	0.720276		0.0424685	0.641102	1	0.138452	0.170719	1	-0.0959878	0.267714	1
ENSG00000164692		turquoise	-0.118711	0.490463	COL1A2	12.697	-3.36298	0.00648629		0.249922	0.0335484		0.00837279	0.933849		-0.0229758	0.837236		-0.24168	0.0115497	1	-0.273047	0.0100473	1	0.0313677	0.730248	1
ENSG00000116954		turquoise	0.116666	0.49802	RRAGC	823.633	0.378796	0.177053		0.130081	0.516098		0.205788	0.329424		-0.240583	0.240024		0.0757359	0.723727	1	-0.370743	0.0762479	1	0.446488	0.0393397	1
ENSG00000241549		turquoise	-0.11595	0.500676	GUSBP2	14.0435	0.660574	0.0463212		0.224892	0.0195823		0.0498155	0.544477		0.0342584	0.707894		-0.175174	0.0241867	1	-0.190739	0.0272959	1	0.0155663	0.832748	1
ENSG00000164109		turquoise	0.115653	0.501783	MAD2L1	36.594	22.093	0.0375882		0.0982148	0.173319		0.0486177	0.427402		0.0417092	0.541537		-0.0496245	0.39016	1	-0.0565369	0.379841	1	0.00691269	0.899374	1
ENSG00000250742		turquoise	-0.115036	0.504081	RP11-834C11.4	29.0039	15.7769	0.00139919		0.116175	0.199139		0.0477495	0.535756		0.143224	0.0951995		-0.0684648	0.347215	1	0.0270634	0.738442	1	-0.0955326	0.166569	1
ENSG00000169967		turquoise	0.11501	0.504178	MAP3K2	3494	-0.200123	0.171195	0.787253	-0.293251	0.0316161	0.480835	-0.179553	0.258648	0.740869	-0.206172	0.150141	0.746535	0.113705	0.488436	1	0.0870845	0.56022	1	0.0266209	0.874864	1
ENSG00000224307		turquoise	-0.114662	0.50548	RP11-344B5.2	80.1658	-22.5993	0.0444605		0.0639371	0.537438		0.00174766	0.984271		0.101366	0.303413		-0.0622249	0.458167	1	0.037449	0.687712	1	-0.0996781	0.210737	1
ENSG00000095539	Yes	turquoise	-0.114575	0.505804	SEMA4G	20.3434	-5.7663	0.0359257		-0.0228336	0.788416		0.00174862	0.980739		0.130229	0.106509		0.0245962	0.719022	1	0.153148	0.0442503	1	-0.128558	0.0472525	1
ENSG00000205339		turquoise	0.114501	0.506079	IPO7	3192.74	0.0683523	0.173115	0.787253	0.0358001	0.784221	0.965417	0.0500249	0.744106	0.955363	-0.246479	0.0731129	0.614488	0.0142301	0.928393	1	-0.2823	0.0493816	1	0.296532	0.0693498	1
ENSG00000226081		turquoise	-0.113909	0.508296	USP12PX	7.56258	-6.408	0.0301664		-0.0163245	0.777535		-0.0272354	0.577635		-0.0349014	0.523158		-0.0109172	0.812573	1	-0.0185875	0.717817	1	0.00767066	0.860133	1
ENSG00000186395		turquoise	0.113764	0.508842	KRT10	548.582	-0.0452862	0.163908		-0.0343502	0.869253		-0.065094	0.761939		-0.435753	0.039738		-0.0307448	0.887403	1	-0.401505	0.062027	1	0.370768	0.089736	1
ENSG00000129465		turquoise	-0.112248	0.51454	RIPK3	739.1	0.263587	0.0261722		0.585485	0.00334155		0.207134	0.325311		0.179384	0.379375		-0.378419	0.0768539	1	-0.406173	0.0513758	1	0.0277541	0.897945	1
ENSG00000235449		turquoise	-0.110951	0.519441	RP11-480I12.2	7.16087	-0.387879	0.283176		-0.00469035	0.973189		0.0308015	0.798579		0.261054	0.0505784		0.0355091	0.757331	1	0.265878	0.0364764	1	-0.230378	0.0360704	1
ENSG00000242208		turquoise	-0.11023	0.522178	RPL5P29	6.33798	4.89525			0.0110732	0.901381		0.188225	0.0134523		0.0359768	0.671275		0.177249	0.0137187	1	0.0249181	0.755517	1	0.152337	0.025483	1
ENSG00000253144		turquoise	-0.110096	0.522688	RP11-281O15.7	5.57634	-3.78669	0.0435175		-0.0106257	0.834319		0.0190979	0.656695		0.0188631	0.694703		0.0297405	0.461943	1	0.0295055	0.513899	1	0.000234982	0.995095	1
ENSG00000198208		turquoise	-0.10927	0.525827	RPS6KL1	32.1709	-22.8305	0.0271061		-0.031343	0.657267		-0.0139934	0.815527		0.058739	0.379975		0	1	1	0.0901327	0.152746	1	-0.0727764	0.173829	1
ENSG00000225193		turquoise	-0.10784	0.531291	RPS12P26	16.0295	-0.95625	0.000324437		0.184904	0.024024		0.0377358	0.588206		0.0234474	0.762705		-0.147252	0.0251682	1	-0.161549	0.027442	1	0	1	1
ENSG00000219928		turquoise	-0.107774	0.531547	RP11-40C6.2	7.16525	-0.799283	0.145833		0.249131	0.0977334		-0.00311636	0.980961		-0.0457085	0.750499		-0.252373	0.0431871	1	-0.294987	0.0317859	1	0.0426162	0.720699	1
ENSG00000169330		turquoise	0.107139	0.533981	KIAA1024	22.0679	0.06016	0.0023423		-0.0632933			-0.0210626			-0.0672045			0.0422544			-0.00391369			0.0461701
ENSG00000277957		turquoise	-0.106016	0.538301	SENP3-EIF4A1	15.1393	-0.739648	0.0485285		0.0408496	0.433031		0.00741053	0.866603		0.00951563	0.846907		-0.0334579	0.420382	1	-0.0313515	0.498953	1	-0.00210645	0.957205	1
ENSG00000204590		turquoise	-0.105938	0.538602	GNL1	1287.86	-0.259911	0.160801		-0.117028	0.512041	0.90783	-0.162576	0.407724		0.242458	0.189079		-0.0455689	0.820665	1	0.359537	0.0590632	1	-0.405112	0.0481302	1
ENSG00000012171		turquoise	-0.104467	0.544288	SEMA3B	6.15809	-0.954272	0.00664774		0.185148	0.0423211		0.0471286	0.544065		0.0761692	0.378508		-0.138097	0.0599415	1	-0.109038	0.182018	1	-0.0290599	0.676243	1
ENSG00000145936	Yes	turquoise	-0.104	0.546098	KCNMB1	589.184	-0.10628	0.058476		-0.118741	0.582267		-0.0106145	0.960839		0.426342	0.0497662		0.108147	0.618236	1	0.545224	0.0127734	1	-0.437087	0.0439568	1
ENSG00000070371		turquoise	0.103557	0.547818	CLTCL1	24.0231	21.3593	0.00178481		0.185855	0.0648618		0.0971234	0.258731		0.106333	0.266011		-0.0887791	0.275081	1	-0.0795642	0.378757	1	-0.00921533	0.904989	1
ENSG00000124097		turquoise	-0.10184	0.55451	HMGB1P1	20.4787	-1.62346	0.0427888		-0.160872	0.144964		-0.095676	0.311514		-0.0458579	0.662173		0.0652336	0.466145	1	0.11508	0.246738	1	-0.0498486	0.557945	1
ENSG00000197256		turquoise	-0.101301	0.556619	KANK2	10.7998	-6.81086	0.0479549		0.0964058	0.171391		0.00851205	0.886878		-0.0018532	0.977851		-0.0879432	0.118938	1	-0.0983143	0.117993	1	0	1	1
ENSG00000280739		turquoise	0.10093	0.558071	EIF1B-AS1	29.0724	9.15902	0.0127825		0.153781	0.0723875		0.0720641	0.322687		0.0457637	0.572832		-0.0817612	0.234619	1	-0.108077	0.158198	1	0.0263166	0.68645	1
ENSG00000181220		turquoise	-0.097184	0.572848	ZNF746	935.17	-0.131073	0.187422		-0.231866	0.253647		-0.070455	0.740177		0.222385	0.283041		0.161439	0.453638	1	0.454345	0.0314728	1	-0.292911	0.178113	1
ENSG00000204001		turquoise	-0.0970149	0.573519	LCN8	92.8921	7.88959	0.00444879		0.148327	0.115083		0.0707793	0.37805		0.115168	0.197328		-0.0775911	0.306494	1	-0.0331775	0.694203	1	-0.0444155	0.537144	1
ENSG00000139116		turquoise	-0.0964843	0.575627	KIF21A	29.4854	0.209282	0.00770727		0.0673885	0.426586		0.0407285	0.57242		0.156364	0.0517088		-0.0266764	0.695279	1	0.0890237	0.240422	1	-0.115705	0.073017	1
ENSG00000130165		turquoise	0.0952144	0.580686	ELOF1	989.984	0.111398	0.131139		-0.415408	0.0392788	0.513604	0.0245422	0.907682		-0.0577542	0.778973		0.440048	0.0404902	1	0.357726	0.0885391	1	0.0823238	0.704488	1
ENSG00000137941		turquoise	-0.0950158	0.58148	TTLL7	10.1996	-15.0473	0.03041		0.113215	0.0831145		0.0229133	0.679271		0.01436	0.816396		-0.0903532	0.0835522	1	-0.0989114	0.0894816	1	0.00855857	0.862454	1
ENSG00000149177	Yes	turquoise	0.0948871	0.581994	PTPRJ	5588.23	0.185703	0.047162	0.539611	0.125568	0.308557	0.84916	0.170718	0.241074	0.726016	0.360697	0.00549629	0.273288	0.0451533	0.76432	1	0.235145	0.0835032	1	-0.189992	0.221601	1
ENSG00000275111		turquoise	-0.0945253	0.583441	ZNF2	21.8279	1.57853	0.0268948		0.107359	0.14493		0.0303411	0.627695		0.0585921	0.401009		-0.0770611	0.19141	1	-0.0487934	0.458045	1	-0.028269	0.61271	1
ENSG00000278857		turquoise	-0.0938083	0.586312	IGKV1D-12	2.67048	3.58124	0.0277765		0.0655579	0.206966		0.0184793	0.674198		0.0110331	0.82231		-0.0471052	0.254983	1	-0.0545557	0.237947	1	0.00745084	0.848907	1
ENSG00000120885		turquoise	0.0929885	0.589603	CLU	27.9324	0.0516789	0.0442531		-0.106913	0.232004		-0.0277919	0.715397		-0.0634173	0.454837		0.0791673	0.271402	1	0.0435216	0.586909	1	0.035647	0.601432	1
ENSG00000113658		turquoise	0.0925505	0.591364	SMAD5	851.645	-0.10273	0.0969402		-0.141301	0.461344		-0.107385	0.601966		-0.488705	0.0131756		0.0339271	0.871556	1	-0.347473	0.0857931	1	0.381407	0.0733862	1
ENSG00000157985		turquoise	-0.0921564	0.592951	AGAP1	5.38368	1.19746	0.0360531		-0.0089642	0.854799		0.0101317	0.80647		-0.00603089	0.896409		0.0191067	0.6233	1	0.00293497	0.946266	1	0.0161724	0.659974	1
ENSG00000157045		turquoise	0.0920737	0.593285	NTAN1	511.559	-0.334155	0.0597447		0.00851954	0.967975		-0.20611	0.339762		-0.517084	0.0160193		-0.214683	0.323782	1	-0.525745	0.0155412	1	0.31107	0.154264	1
ENSG00000183889		turquoise	-0.0898606	0.602233	AC138969.4	28.3771	-4.83826	0.0866906		-0.221296	0.0570736		-0.208894	0.0363378		-0.215287	0.0517292		0.0124072	0.895647	1	0.0060123	0.95428	1	0.0063951	0.943331	1
ENSG00000134285		turquoise	-0.0895427	0.603523	FKBP11	534.11	-0.162915	0.141593		0.0167116	0.937153		-0.0310567	0.885593		0.40062	0.0617555		-0.0477943	0.826124	1	0.383999	0.0769654	1	-0.431802	0.0480164	1
ENSG00000162896	Yes	turquoise	-0.0888474	0.606349	PIGR	4.67451	-0.88302	0.0278227		-0.10067	0.605835		0.199779	0.257928		-0.0528104	0.780475		0.300584	0.0783466	1	0.0478797	0.793974	1	0.252713	0.127134	1
ENSG00000204644		turquoise	0.0885411	0.607596	ZFP57	62.1508	-0.753376	0.0247031		-0.113603	0.191334		-0.0670699	0.365046		-0.11797	0.152498		0.0465594	0.505396	1	-0.00437035	0.955212	1	0.050932	0.442095	1
ENSG00000233155		turquoise	-0.0884241	0.608072	HMGA1P8	16.844	-0.220401	0.116158		0.249074	0.0291526		0.0551314	0.573256		0.0699337	0.519553		-0.194047	0.0364979	1	-0.179235	0.0815668	1	-0.0148133	0.866619	1
ENSG00000224261		turquoise	-0.0869934	0.613912	RP11-179G5.1	9.44666	-0.534401	0.00509643		-0.202987	0.054366		-0.0974908	0.280044		-0.182465	0.0687607		0.105557	0.216335	1	0.0205333	0.828552	1	0.0850281	0.294377	1
ENSG00000276045		turquoise	-0.0862081	0.617127	ORAI1	1378.64	0.214859	0.124948	0.730654	0.368176	0.0419451	0.524961	0.161728	0.414713	0.848939	-0.0246063	0.895351	0.991078	-0.206472	0.308635	1	-0.39284	0.0415615	1	0.18637	0.367232	1
ENSG00000231233		turquoise	-0.085333	0.620718	CCDC147-AS1	47.6738	-2.26229	0.00176013		-0.13581	0.0890044		-0.100455	0.139102		-0.126801	0.093862		0.0353753	0.580844	1	0	1	1	0.0263625	0.664001	1
ENSG00000226544		turquoise	-0.0853158	0.620789	RPL7P22	7.00996	0.17074	0.00396024		0.0593006	0.253962		0.0146621	0.739		0.0212585	0.665489		-0.0446639	0.280915	1	-0.0380635	0.410623	1	-0.00660066	0.866133	1
ENSG00000260172		turquoise	-0.0851798	0.621348	LINC01413	6.68023	0.170708	0.042668		0	1		0	1		0.0756987	0.125211		0	1	1	0.070199	0.130686	1	-0.0609605	0.121111	1
ENSG00000272583		turquoise	-0.0847708	0.62303	RP11-344P13.6	21.2807	-2.77188	0.0154066		0	1		0	1		0.0892426	0.0951669		0	1	1	0.0827595	0.10008	1	-0.0718713	0.0918558	1
ENSG00000144061		turquoise	-0.0835732	0.627966	NPHP1	13.1471	-7.59461	0.0460776		0.0837033	0.241895		0.000908963	0.988059		-0.00978138	0.885188		-0.0828408	0.147893	1	-0.0935372	0.142808	1	0	1	1
ENSG00000177570		turquoise	-0.0834878	0.628319	SAMD12	25.443	18.2531	0.0499725		0.0466311	0.49091		0.0270256	0.638046		0.0912435	0.154595		-0.0196171	0.717068	1	0.0446369	0.459708	1	-0.0642568	0.209736	1
ENSG00000123144		turquoise	-0.0784114	0.649422	C19orf43	5112.23	-0.0708705	0.152983	0.767243	0.0913344	0.423623	0.891049	-0.0640148	0.637802	0.92801	-0.193601	0.108278	0.689261	-0.155357	0.26976	1	-0.28495	0.0240096	1	0.129593	0.373139	1
ENSG00000225411		turquoise	-0.0764892	0.657484	RP11-764K9.1	6.39391	1.77805	0.00129001		0.241772	0.0238414		0.0751694	0.410638		0.0230313	0.820527		-0.166692	0.0542948	1	-0.21886	0.0229284	1	0.0521709	0.525343	1
ENSG00000204178		turquoise	-0.0762583	0.658455	TMEM57	738.375	-0.33801	0.133065		0.0561091	0.795081		-0.0836924	0.698613		0.389346	0.0733358		-0.139861	0.519105	1	0.333323	0.128038	1	-0.473194	0.0290944	1
ENSG00000185641		turquoise	-0.0753282	0.662372	CTD-2287O16.1	4671.39	-0.169512	0.0626537	0.602522	-0.134638	0.189503	0.76555	-0.159825	0.195374	0.687509	-0.291954	0.00719515	0.292712	-0.0251883	0.843927	1	-0.157323	0.167457	1	0.132135	0.318421	1
ENSG00000222057		turquoise	-0.0748244	0.664498	RNU4-62P	20.951	7.78341	0.0380065		0.0925108	0.255946		0.0559515	0.419257		0.0948914	0.218953		-0.0365798	0.575729	1	0.00238192	0.973902	1	-0.0389634	0.529207	1
ENSG00000141956		turquoise	-0.0746616	0.665185	PRDM15	709.113	-0.0761911	0.0473165		-0.41434	0.0337668		-0.064972	0.754757		0.144595	0.469914		0.349433	0.098864	1	0.559037	0.0063886	1	-0.209608	0.328669	1
ENSG00000198740		turquoise	0.0738396	0.668661	ZNF652	2071.91	-0.201405	0.257073	0.860712	-0.128448	0.462499	0.898768	-0.16592	0.391188	0.842835	-0.366804	0.0429069	0.528949	-0.0374765	0.850085	1	-0.238392	0.202708	1	0.200918	0.321009	1
ENSG00000114670		turquoise	-0.073492	0.670132	NEK11	57.1724	-0.579433	0.048724		0.0893522	0.320271		0.00127519	0.98672		-0.0317742	0.709453		-0.088125	0.223252	1	-0.121193	0.132264	1	0.0330701	0.62976	1
ENSG00000141391		turquoise	-0.0732815	0.671023	SLMO1	16.8346	-9.9869	0.00884501		0.100626	0.13435		0	1		0.0367928	0.563136		-0.0756718	0.159075	1	-0.0638683	0.28663	1	-0.0118041	0.816425	1
ENSG00000205959		turquoise	-0.0729642	0.672369	RP11-689P11.2	22.2719	-11.2514	0.0102905		0.118594	0.110069		0	1		0.05089	0.469183		-0.0878218	0.139618	1	-0.0677409	0.306666	1	-0.0200819	0.721256	1
ENSG00000127527		turquoise	0.0718521	0.67709	EPS15L1	1490.22	-0.0755427	0.072708	0.631619	-0.377776	0.039125	0.512772	-0.0992174	0.61954	0.921881	-0.412705	0.0290267	0.472343	0.278608	0.17264	1	-0.0349394	0.857577	1	0.313552	0.131775	1
ENSG00000228389		turquoise	-0.0715973	0.678174	AC068039.4	21.6453	14.8343	0.021638		0.0102844	0.850769		-0.00596807	0.897455		0.0118331	0.819029		-0.0162617	0.709116	1	0.00154962	0.974597	1	-0.0178121	0.665637	1
ENSG00000127452		turquoise	-0.0712722	0.679557	FBXL12	803.294	-0.256766	0.11472		-0.452711	0.0321507		-0.164638	0.445275		0.0131094	0.951143		0.288141	0.185313	1	0.465934	0.0315942	1	-0.177796	0.415747	1
ENSG00000135925		turquoise	-0.0707585	0.681746	WNT10A	33.984	-7.02671	0.0155842		0.087595	0.297429		-0.0138212	0.846826		-0.0290824	0.715193		-0.101473	0.132943	1	-0.116743	0.120547	1	0.0152706	0.811385	1
ENSG00000187955		turquoise	-0.0693717	0.687665	COL14A1	7.17596	1.53925	0.000579987		0.322004	0.00294054		0.0710689	0.442727		0.038725	0.706475		-0.251075	0.0042149	1	-0.283437	0.00361979	1	0.0323642	0.697568	1
ENSG00000215251		turquoise	0.0680889	0.693157	FASTKD5	1048.82	-0.220769	0.031615		-0.511405	0.00346583	0.197318	-0.198539	0.30506		-0.314074	0.0831334		0.31291	0.114739	1	0.197355	0.291947	1	0.115556	0.568304	1
ENSG00000186280		turquoise	-0.0674653	0.695833	KDM4D	9.68619	0.170738	0.00762794		0.111229	0.0839525		0	1		0	1		-0.088455	0.0854248	1	-0.0970225	0.0908177	1	0	1	1
ENSG00000242829		turquoise	0.0673811	0.696194	RPS26P21	30.5533	7.86388	0.00309051		0.176502	0.0353526		0.0471665	0.508773		0.0367077	0.644351		-0.129408	0.054771	1	-0.139872	0.0622769	1	0.0104649	0.869791	1
ENSG00000107745		turquoise	-0.0644241	0.708932	MICU1	1093.76	-0.251025	0.129374		-0.42272	0.0175138	0.383122	-0.201544	0.303613		-0.136847	0.457252		0.221205	0.270186	1	0.285913	0.132344	1	-0.0647088	0.751817	1
ENSG00000135972		turquoise	-0.06341	0.713319	MRPS9	618.629	-0.163788	0.0826886		0.0531502	0.791497		-0.123121	0.560306		-0.453306	0.0273377		-0.176304	0.411307	1	-0.506566	0.0157075	1	0.330269	0.127907	1
ENSG00000263724		turquoise	-0.0622409	0.718387	DLGAP1-AS3	23.9808	-3.44388	0.0276104		0.068318	0.308006		0	1		0.0682934	0.281812		-0.0435007	0.416897	1	-2.45831e-05	0.999672	1	-0.043478	0.391197	1
ENSG00000157014		turquoise	0.0616756	0.720842	TATDN2	1334.26	0.241415	0.0212086		-0.264444	0.104905	0.666247	0.174948	0.340911		0.247033	0.145514		0.439449	0.0199286	1	0.511535	0.00365291	1	-0.0720857	0.709243	1
ENSG00000233971		turquoise	0.060677	0.725185	RPS20P10	11.2132	-0.600211	0.0315004		-0.104547	0.175043		-0.0536505	0.412901		-0.0972744	0.182964		0.050926	0.409843	1	0.00727689	0.915836	1	0.0436512	0.455691	1
ENSG00000215193		turquoise	0.0605901	0.725563	PEX26	1941.83	-0.128647	0.0306372	0.466001	-0.0668696	0.697734	0.945476	-0.12176	0.52463	0.890858	-0.516494	0.00383972	0.242305	-0.054893	0.779685	1	-0.449689	0.0149015	1	0.394801	0.048991	1
ENSG00000278727		turquoise	-0.059499	0.730319	AC000403.4	19.2692	-12.615	0.0122944		0.0769721	0.302679		0	1		0.0947545	0.180474		-0.0457685	0.444258	1	0.017792	0.789617	1	-0.0635633	0.261813	1
ENSG00000198732		turquoise	-0.0593851	0.730816	SMOC1	15.5468	5.88808	0.00946647		0.0814252	0.19856		0.0450102	0.401983		0.0127303	0.831826		-0.0364352	0.471415	1	-0.0687337	0.22335	1	0.0322999	0.499736	1
ENSG00000099957	Yes	turquoise	-0.0589585	0.732679	P2RX6	22.9197	8.68891	0.000107974		0.0177347	0.845327		0.0808961	0.296486		0.211077	0.0144016		0.0631987	0.38788	1	0.193451	0.0175393	1	-0.130577	0.0602481	1
ENSG00000103202		turquoise	0.0581668	0.73614	NME4	889.276	0.205607	0.0626373		0.0451308	0.836299		0.0211952	0.918936		-0.431894	0.0459301		-0.0239366	0.90757	1	-0.477214	0.0262002	1	0.453292	0.0258953	1
ENSG00000225855		turquoise	-0.0573419	0.739751	RUSC1-AS1	53.635	7.49643	0.0393065		0.0924992	0.230271		0.0439595	0.502394		0.0801794	0.27245		-0.0485671	0.432041	1	-0.0123265	0.85797	1	-0.0362421	0.53584	1
ENSG00000197410	Yes	turquoise	-0.0563504	0.744099	DCHS2	3.09501	-1.47825	0.0184898		-0.0288691	0.680539		-0.0214049	0.718395		0.00225266	0.972947		0.00746827	0.89372	1	0.0311392	0.618491	1	-0.0236719	0.654688	1
ENSG00000198830		turquoise	-0.0556184	0.747315	HMGN2	5723.36	-0.00457178	0.0977616	0.687085	-0.153921	0.185984	0.76547	-0.0036016	0.979229	0.994604	0.167901	0.17153	0.77564	0.150326	0.293788	1	0.321839	0.0123158	1	-0.171514	0.246272	1
ENSG00000138663		turquoise	-0.0552096	0.749112	COPS4	681.907	-0.365956	0.138323		0.124896	0.544405		-0.205344	0.336905		-0.338867	0.106111		-0.330318	0.126989	1	-0.463868	0.0296995	1	0.133552	0.540489	1
ENSG00000214784		turquoise	-0.0547902	0.750957	AC010468.1	24.7178	0.121938	0.0296064		0.329091	0.0731635		0.0441874	0.786662		-0.145257	0.412346		-0.285026	0.0705492	1	-0.474574	0.00554857	1	0.189556	0.212143	1
ENSG00000240005		turquoise	-0.0525251	0.760946	RP11-293A21.1	10.4495	0.170718	0.0258684		0.0831387	0.137318		0	1		0	1		-0.0661179	0.138481	1	-0.0725201	0.145488	1	0	1	1
ENSG00000214078		turquoise	0.0522472	0.762175	CPNE1	4905.14	0.144434	0.203196	0.818355	0.185456	0.212593	0.78378	0.113528	0.506377	0.882227	-0.145522	0.349929	0.899442	-0.071929	0.682836	1	-0.331009	0.0410076	1	0.259083	0.152104	1
ENSG00000133895		turquoise	-0.0522273	0.762262	MEN1	1142.7	-0.0686031	0.064622		0.156293	0.427818	0.891049	-0.057939	0.781802		-0.395501	0.0501503		-0.214267	0.313818	1	-0.551904	0.00755145	1	0.337643	0.117105	1
ENSG00000124226		turquoise	0.0518994	0.763713	RNF114	3033.65	-0.149831	0.0223697	0.413425	-0.198013	0.142185	0.713657	-0.143717	0.361332	0.820722	-0.441751	0.00183235	0.163996	0.0543027	0.738397	1	-0.243759	0.0994612	1	0.298063	0.0752235	1
ENSG00000214194		turquoise	-0.0512972	0.766378	LINC00998	505.513	0.166296	3.7498e-07		0.110278	0.554255		0.177533	0.380067		0.96338	5.23758e-07		0.0672526	0.744679	1	0.853232	1.55253e-05	0.377497	-0.78599	0.000181471	1
ENSG00000036257		turquoise	0.048722	0.777804	CUL3	1901.4	-0.188286	0.122129	0.722584	-0.403439	0.0163176	0.371849	-0.161151	0.391085	0.842835	-0.119562	0.493314	0.937532	0.242316	0.209023	1	0.28391	0.116156	1	-0.0415947	0.83303	1
ENSG00000279801		turquoise	-0.0485737	0.778463	RP11-75C10.6	9.98964	-0.958855	0.0110781		0.130796	0.0609839		0.0266916	0.652383		0.0169024	0.798189		-0.104164	0.0621788	1	-0.113958	0.0672926	1	0.00979512	0.852982	1
ENSG00000129422		turquoise	-0.047989	0.781064	MTUS1	16.5606	-2.34675	9.56235e-06		0.0224622	0.824556		0.0594112	0.492554		0.307656	0.00139359		0.0369699	0.651643	1	0.285355	0.00171848	1	-0.248396	0.00140081	1
ENSG00000186862		turquoise	-0.0477089	0.782311	PDZD7	18.9564	-1.96619	0.000937539		0.0751851	0.364474		0.0378999	0.591041		0.136089	0.0833819		-0.0373074	0.575179	1	0.0609372	0.411205	1	-0.0982488	0.119327	1
ENSG00000205038	Yes	turquoise	0.0466192	0.787168	PKHD1L1	24.2898	-0.24288	0.0351456		-0.073513	0.489755		-0.000108618	0.999048		0.111903	0.268641		0.0734467	0.394162	1	0.185518	0.0525998	1	-0.112076	0.171094	1
ENSG00000103260		turquoise	0.0455349	0.792008	METRN	23.3989	9.31357	0.0031373		0.136516	0.0947069		0.084964	0.221492		0.0236587	0.759959		-0.0515799	0.431554	1	-0.112921	0.122106	1	0.0613435	0.323436	1
ENSG00000174989		turquoise	0.04523	0.79337	FBXW8	639.653	-0.559489	0.203559		-0.103233	0.637513		-0.249813	0.235765		-0.436843	0.0447741		-0.146634	0.483217	1	-0.333732	0.123335	1	0.187104	0.365837	1
ENSG00000259022		turquoise	-0.0434215	0.801464	DNAJC8P1	4.64885	-3.48311	0.0464769		-0.184075	0.121226		-0.197263	0.0529338		-0.236605	0.0363066		-0.0131987	0.891291	1	-0.0525631	0.623456	1	0.0393662	0.668188	1
ENSG00000171311		turquoise	0.042869	0.80394	EXOSC1	810.483	0.0657816	0.180139		0.286726	0.167029		0.0427652	0.841926		-0.179993	0.393448		-0.24401	0.2605	1	-0.466824	0.0294223	1	0.222819	0.307625	1
ENSG00000163807		turquoise	-0.0402229	0.815828	KIAA1143	1232.76	0.249507	0.0690526		-0.116642	0.506896	0.90783	0.182273	0.347964		0.345509	0.0576317		0.29896	0.132941	1	0.462215	0.0139179	1	-0.163256	0.421404	1
ENSG00000109118		turquoise	0.0388237	0.82213	PHF12	2945.54	-0.152444	0.0592711	0.591161	-0.204995	0.168737	0.746097	-0.14398	0.399809	0.843936	-0.425643	0.0063133	0.287818	0.0610232	0.729109	1	-0.220671	0.173607	1	0.281697	0.119786	1
ENSG00000099365		turquoise	0.0375299	0.827967	STX1B	21.5752	8.27704	0.0268764		0.086864	0.307087		0.0695316	0.336853		0.110887	0.169119		-0.0173422	0.799681	1	0.0240362	0.752101	1	-0.0413746	0.522907	1
ENSG00000196338	Yes	turquoise	-0.0374426	0.828362	NLGN3	26.391	-0.589391	0.00938775		-0.117306	0.146971		-0.0592355	0.38925		-0.107507	0.160829		0.0581045	0.370699	1	0.00980492	0.892128	1	0.0483017	0.432149	1
ENSG00000115944		turquoise	-0.0372671	0.829154	COX7A2L	2853.54	-0.0420359	0.199447	0.816513	-0.202358	0.191547	0.768142	-0.0336806	0.848679	0.971472	0.157199	0.331129	0.88534	0.168692	0.353181	1	0.359593	0.0323954	1	-0.190903	0.305865	1
ENSG00000134982		turquoise	-0.0371625	0.829627	APC	1680.22	-0.455992	0.0394926	0.508968	-0.013891	0.941275	0.990009	-0.315607	0.121321	0.607485	-0.49102	0.0114293	0.35444	-0.301774	0.146564	1	-0.477213	0.016731	1	0.175441	0.406342	1
ENSG00000272356		turquoise	0.0359243	0.835225	RP5-1112D6.8	24.1462	8.81844	0.0314287		0.0500709	0.532537		0.0606602	0.37397		0.125358	0.0992278		0.010595	0.869264	1	0.0753279	0.29351	1	-0.0647356	0.288408	1
ENSG00000153208	Yes	turquoise	-0.0343428	0.842385	MERTK	19.7745	1.26169	0.0145756		0.0913669	0.333299		0.0517331	0.520722		0.186627	0.0373286		-0.039658	0.602394	1	0.0953112	0.260338	1	-0.134975	0.0616091	1
ENSG00000230568		turquoise	-0.0331975	0.847579	SF3A3P1	2.19146	-1.39821	0.0393465		-0.0032756	0.968092		0.00290122	0.966711		0.0834865	0.282672		0.00617997	0.924921	1	0.0868096	0.236155	1	-0.0806331	0.194851	1
ENSG00000281100		turquoise	-0.031034	0.857407	RP11-640L9.2	6.93228	0.170709	0.040302		0	1		0	1		0.0748108	0.127574		0	1	1	0.0693734	0.133091	1	-0.0602311	0.1234	1
ENSG00000243802		turquoise	-0.0306193	0.859294	RP11-390K5.1	11.6703	-1.85208	0.126563		0.219853	0.0889173		-0.0128218	0.908173		-0.0487438	0.69193		-0.232797	0.0276948	1	-0.268739	0.0216179	1	0.0359434	0.720877	1
ENSG00000159166		turquoise	-0.0278193	0.872049	LAD1	12.6748	-14.0137	0.0167817		0.0695605	0.181767		0.0142101	0.747314		0.00982141	0.842012		-0.0553819	0.182193	1	-0.0597731	0.197273	1	0.00439139	0.910904	1
ENSG00000227603		turquoise	0.0253874	0.883154	RP11-165J3.6	58.9601	-0.691325	0.0190727		-0.084837	0.377309		-0.0622896	0.447509		-0.121015	0.184592		0.0225597	0.771006	1	-0.0362	0.674451	1	0.0587623	0.424223	1
ENSG00000256973		turquoise	0.0250074	0.884891	RP11-359J14.2	15.9101	21.7562	0.0377261		0.0811902	0.184633		0.0394982	0.446525		0	1		-0.0417152	0.393319	1	-0.0683892	0.209786	1	0.0266752	0.563888	1
ENSG00000229605		turquoise	-0.0241421	0.888849	RP11-492M23.2	6.42015	1.04776	0.0137495		0.390636	0.00335732		0.102221	0.37293		0.0510444	0.687351		-0.288563	0.0082861	1	-0.339769	0.00491699	1	0.0512081	0.622552	1
ENSG00000201512		turquoise	-0.0236134	0.891269	SNORA71C	23.248	-1.92331	0.0226804		-0.0940952	0.165405		-0.0671608	0.24338		-0.087725	0.172021		0.0269501	0.619332	1	0	1	1	0.0205771	0.688548	1
ENSG00000173744		turquoise	-0.0231064	0.89359	AGFG1	2140.94	-0.117298	0.168668	0.784437	-0.257086	0.119614	0.683671	-0.0905653	0.625466	0.923961	0.12987	0.449698	0.919085	0.166536	0.382203	1	0.387001	0.0297133	1	-0.220467	0.258414	1
ENSG00000229091		turquoise	-0.022407	0.896793	HSPA8P8	2.86112	-5.87124	0.0142639		-0.044589	0.675304		-0.11544	0.20349		-0.134587	0.182675		-0.0708921	0.409025	1	-0.0900497	0.34573	1	0.0191584	0.813988	1
ENSG00000213889		turquoise	-0.0188	0.913338	PPM1N	44.172	-7.8619	0.0284711		0.00900999	0.899949		-0.0360233	0.553883		-0.0471486	0.487282		-0.0450588	0.432166	1	-0.0561905	0.379621	1	0.0111322	0.837561	1
ENSG00000114204		turquoise	0.0186186	0.914172	SERPINI2	19.7761	7.94686	0.00125266		0.00737875	0.904273		0.05405	0.298778		0.0713424	0.219273		0.046698	0.340489	1	0.064	0.241743	1	-0.0172963	0.708936	1
ENSG00000101365		turquoise	-0.0180439	0.916812	IDH3B	3529.83	-0.187652	0.0106562	0.312792	-0.503915	0.00115169	0.118503	-0.167439	0.343017	0.815069	-0.0738824	0.648005	0.969526	0.33651	0.0641244	1	0.430076	0.0105439	1	-0.0935667	0.6159	1
ENSG00000226284		turquoise	-0.0169831	0.921687	ARPC3P1	140.973	0.639913	0.220996		0.0824391	0.683474		0.182496	0.321087		0.394647	0.0451375		0.1001	0.576173	1	0.312332	0.103717	1	-0.212238	0.223097	1
ENSG00000129521		turquoise	0.016784	0.922602	EGLN3	12.2647	7.97082	0.00846869		0.118324	0.0886555		0.0391966	0.506407		0	1		-0.0791718	0.154462	1	-0.101623	0.101206	1	0.0224524	0.669601	1
ENSG00000100219		turquoise	0.0167811	0.922616	XBP1	2291.37	-0.211292	0.221037	0.83686	-0.262713	0.129049	0.694363	-0.180481	0.347468	0.816421	-0.353166	0.0491148	0.552273	0.0822432	0.676235	1	-0.0904681	0.625799	1	0.172713	0.390633	1
ENSG00000138768		turquoise	-0.0157138	0.927524	USO1	2044.21	0.0368862	0.267702	0.866332	0.140551	0.41168	0.891049	0.0210248	0.912162	0.98502	-0.223557	0.208392	0.806008	-0.119537	0.540841	1	-0.364157	0.0475207	1	0.244622	0.220836	1
ENSG00000007402		turquoise	-0.0150522	0.930568	CACNA2D2	8.43625	-0.958529	0.00619106		0.00564294	0.91358		0.0139638	0.751108		0.0728545	0.13862		0.00832559	0.840751	1	0.0672498	0.146186	1	-0.0589268	0.132549	1
ENSG00000263503		turquoise	0.014962	0.930983	RP11-707O23.5	39.6607	-14.9394	0.000801046		0.179746	0.05156		0.0490937	0.532855		0.0910254	0.298778		-0.130725	0.0788009	1	-0.0887682	0.283325	1	-0.0419589	0.551903	1
ENSG00000263883		turquoise	-0.01409	0.934996	EEF1DP7	36.718	-0.118761	0.0489237		-0.0848871	0.291996		-0.0263551	0.700506		-0.044717	0.558111		0.0585655	0.364948	1	0.0401934	0.576721	1	0.0183729	0.764156	1
ENSG00000083312		turquoise	-0.0132881	0.938689	TNPO1	2632.3	-0.2549	0.211582	0.831	-0.314469	0.0453576	0.52812	-0.215657	0.226986	0.710136	-0.234571	0.152472	0.753342	0.0988194	0.590539	1	0.0799049	0.638828	1	0.0189145	0.920021	1
ENSG00000276390		turquoise	-0.011997	0.944636	RP1-197B17.5	21.8825	-7.20839	0.033852		0.0641459	0.330155		0	1		0.0676115	0.278312		-0.0402092	0.445079	1	0.00346752	0.952922	1	-0.0436787	0.380655	1
ENSG00000212802		turquoise	-0.0111932	0.948341	RPL15P3	12260.8	-0.0516827	0.245591	0.852311	-0.154442	0.0458021	0.529035	-0.0512709	0.587916	0.913042	-0.0916663	0.26465	0.852316	0.103173	0.293751	1	0.0627767	0.467791	1	0.0403968	0.691959	1
ENSG00000188626		turquoise	-0.0108336	0.949998	GOLGA8M	14.6639	-5.97411	0.0212263		-0.0388146	0.647585		-0.0130784	0.856412		0.101108	0.209233		0.0257509	0.705833	1	0.140001	0.0653591	1	-0.114295	0.0771691	1
ENSG00000271361		turquoise	0.00881668	0.959298	HTATSF1P2	46.1975	9.00503	0.000469688		0.0739816	0.4769		0.100246	0.259684		0.244232	0.0134564		0.0262787	0.754843	1	0.170341	0.0684172	1	-0.144069	0.0714377	1
ENSG00000149548		turquoise	0.00679614	0.968621	CCDC15	22.103	-16.4733	0.0116376		0.101551	0.246216		0.0424314	0.569433		0.135694	0.102321		-0.0591539	0.400952	1	0.0341607	0.663033	1	-0.0933187	0.162167	1
ENSG00000263006		turquoise	0.00550465	0.974582	ROCK1P1	23.1353	0.445394	0.0158235		0.253667	0.0570189		0.0931556	0.417946		0.227083	0.0741021		-0.160598	0.142181	1	-0.0265962	0.825953	1	-0.134007	0.198989	1
ENSG00000110324	Yes	turquoise	-0.00365556	0.983119	IL10RA	20423	-0.141533	0.0451567	0.526749	-0.265554	0.00578331	0.241878	-0.133827	0.249758	0.730268	-0.0550027	0.589533	0.958618	0.131731	0.274664	1	0.210558	0.049181	1	-0.0788277	0.527953	1
ENSG00000164938		yellow	0.847657	6.93007e-11	TP53INP1	3042.53	-0.332191	0.157695	0.772168	-0.330353	0.129249	0.694363	-0.224576	0.297487	0.78217	-0.482437	0.0271878	0.46674	0.105807	0.623812	1	-0.152139	0.487879	1	0.257952	0.230381	1
ENSG00000178695		yellow	-0.847468	7.06639e-11	KCTD12	17156.8	0.231729	0.0176486	0.366945	0.385799	0.00184344	0.148723	0.213754	0.143743	0.636317	0.253811	0.0517983	0.554539	-0.172054	0.255138	1	-0.131995	0.333437	1	-0.0400593	0.797405	1
ENSG00000101347		yellow	-0.8459	8.3019e-11	SAMHD1	61066.5	0.00602047	0.0782139	0.652897	0.272959	0.0150569	0.362896	0.0137298	0.918358	0.98543	0.0927097	0.434399	0.917971	-0.259244	0.0616124	1	-0.180257	0.14686	1	-0.0789871	0.581731	1
ENSG00000111321	Yes	yellow	-0.828307	4.51938e-10	LTBR	2748.26	0.425423	0.0721369	0.631225	0.307523	0.052274	0.544644	0.347683	0.0529793	0.498072	0.383744	0.0202087	0.44992	0.0401703	0.827908	1	0.0762309	0.656681	1	-0.0360606	0.849064	1
ENSG00000163563		yellow	-0.824489	6.36611e-10	MNDA	10780.3	0.321961	0.00517489	0.234038	0.315159	0.00777169	0.27949	0.29495	0.035754	0.438131	0.407041	0.00111726	0.128198	-0.0202084	0.889428	1	0.0918882	0.482065	1	-0.112097	0.45529	1
ENSG00000197329		yellow	0.813308	1.65925e-09	PELI1	2066.69	-1.03471	0.000149993	0.042101	-0.757268	0.000136276	0.0368529	-0.700136	0.000855547	0.114606	-0.693776	0.000636947	0.0972095	0.0571231	0.78897	1	0.0634982	0.759817	1	-0.00637622	0.976451	1
ENSG00000168066		yellow	0.803116	3.76526e-09	SF1	13032	-0.185929	0.0157764	0.35426	-0.281154	0.00287125	0.186251	-0.177649	0.119571	0.606514	-0.228457	0.0222858	0.46674	0.103508	0.381933	1	0.0526986	0.615691	1	0.0508093	0.678661	1
ENSG00000132819		yellow	0.802841	3.84698e-09	RBM38	2960.12	-0.136389	0.0178233	0.368869	-0.514007	0.00947254	0.30049	-0.158048	0.451167	0.858772	-0.522816	0.00993272	0.341915	0.356036	0.094968	1	-0.00881738	0.966086	1	0.36486	0.0909666	1
ENSG00000197629	Yes	yellow	-0.797409	5.83726e-09	MPEG1	37521.8	0.265015	0.00725302	0.263738	0.226138	0.0374745	0.506086	0.24671	0.0578417	0.511444	0.384742	0.000811808	0.106274	0.0205746	0.878623	1	0.158612	0.187818	1	-0.138038	0.321856	1
ENSG00000163606	Yes	yellow	-0.796511	6.24602e-09	CD200R1	911.549	1.2874	0.10791		0.478285	0.0222654		0.381713	0.0477538		0.319963	0.118233		-0.0966002	0.608663	1	-0.158378	0.429884	1	0.0617796	0.737472	1
ENSG00000140749	Yes	yellow	-0.778892	2.21225e-08	IGSF6	3734.24	0.46869	0.0444378	0.524406	0.549284	0.00542074	0.236834	0.3375	0.107054	0.593019	0.383969	0.0576432	0.566457	-0.211817	0.319839	1	-0.165341	0.424194	1	-0.0464768	0.829332	1
ENSG00000197471	Yes	yellow	-0.778453	2.27977e-08	SPN	7733.04	0.177013	0.0580318	0.586208	0.351207	0.0118137	0.331015	0.165336	0.307325	0.791301	0.301025	0.0397078	0.514246	-0.185886	0.266032	1	-0.0501836	0.74225	1	-0.135703	0.430247	1
ENSG00000140968		yellow	0.776888	2.53595e-08	IRF8	11430.3	-0.0724503	0.144466	0.750906	-0.275425	0.0375821	0.506086	-0.0759648	0.623985	0.923961	-0.232694	0.0946825	0.667874	0.199477	0.212738	1	0.0427332	0.768815	1	0.156745	0.342119	1
ENSG00000110851		yellow	0.776625	2.58153e-08	PRDM4	2014.4	-0.20265	0.0447791	0.524406	-0.539903	0.00577789	0.241878	-0.185327	0.373549	0.829385	-0.340201	0.0897948	0.658596	0.354646	0.0942757	1	0.199736	0.330746	1	0.154913	0.470789	1
ENSG00000100100	Yes	yellow	0.772595	3.38219e-08	PIK3IP1	1571.8	-0.381235	0.21478	0.832565	-0.335273	0.118886	0.682585	-0.248358	0.25073	0.730268	-0.433103	0.0456717	0.547407	0.086936	0.689097	1	-0.097863	0.65445	1	0.184803	0.395461	1
ENSG00000157514		yellow	0.765018	5.53946e-08	TSC22D3	20524.4	-0.274009	0.0120444	0.314485	-0.186379	0.215561	0.78378	-0.240834	0.162527	0.650545	-0.527696	0.000799134	0.106274	-0.0544599	0.759156	1	-0.341353	0.037035	1	0.286896	0.115878	1
ENSG00000205730		yellow	-0.761721	6.82733e-08	ITPRIPL2	1148.38	0.567407	0.00116144		0.649136	0.00014254	0.0368529	0.457373	0.0161627		0.511784	0.00386753		-0.191779	0.325362	1	-0.137364	0.453306	1	-0.0544154	0.784877	1
ENSG00000131370		yellow	0.758625	8.28293e-08	SH3BP5	4993.01	-0.52579	0.000645671	0.079353	-0.519884	0.00204476	0.156618	-0.435012	0.0209591	0.354511	-0.662011	0.000157164	0.044524	0.0848783	0.660723	1	-0.14215	0.433012	1	0.22703	0.251055	1
ENSG00000188529		yellow	0.75735	8.96196e-08	SRSF10	4025.57	-0.392379	0.0911729	0.677699	-0.294559	0.042385	0.525829	-0.330469	0.0483635	0.47882	-0.282283	0.0633072	0.595689	-0.0359197	0.835148	1	0.0122762	0.938192	1	-0.0481966	0.785974	1
ENSG00000092964		yellow	-0.755834	9.83578e-08	DPYSL2	6796.67	-0.052091	0.0410377	0.511945	0.327739	0.0268128	0.454267	-0.0134437	0.937019	0.987238	0.31384	0.0427529	0.528506	-0.341223	0.051625	1	-0.013898	0.931293	1	-0.327328	0.0692753	1
ENSG00000144711		yellow	0.750356	1.36907e-07	IQSEC1	5928.52	-0.269451	0.116899	0.709916	-0.292621	0.0536799	0.548316	-0.233097	0.179167	0.671018	-0.33632	0.0338838	0.487556	0.0595274	0.739069	1	-0.0437058	0.790918	1	0.103234	0.573788	1
ENSG00000101916	Yes	yellow	-0.741893	2.24512e-07	TLR8	2014.78	0.890284	0.118301	0.711669	0.436569	0.0463173	0.531763	0.417881	0.0504573	0.484541	0.45435	0.0377515	0.506186	-0.0186835	0.930074	1	0.01779	0.935129	1	-0.0364739	0.863039	1
ENSG00000196781		yellow	0.738884	2.66473e-07	TLE1	1126.3	-0.324712	0.182561		-0.259635	0.234019	0.796461	-0.194081	0.349847		-0.465251	0.0312332		0.0655765	0.749501	1	-0.205703	0.336679	1	0.271288	0.180523	1
ENSG00000107263		yellow	0.738356	2.74545e-07	RAPGEF1	10826.1	-0.24473	0.00129435	0.110627	-0.388853	0.000132278	0.0368529	-0.231745	0.0583717	0.511444	-0.266215	0.013429	0.385222	0.157113	0.21575	1	0.122642	0.277765	1	0.0344709	0.79302	1
ENSG00000119900		yellow	-0.738078	2.78891e-07	OGFRL1	10041.9	0.12043	0.011477	0.314485	0.344244	0.00692846	0.260013	0.122165	0.415192	0.848939	0.375534	0.00513174	0.260961	-0.222097	0.151829	1	0.0312939	0.823403	1	-0.253392	0.112947	1
ENSG00000127951		yellow	-0.732023	3.90511e-07	FGL2	23665.1	0.475144	0.00508874	0.234038	0.392433	0.00344397	0.197318	0.414756	0.00811552	0.255753	0.402033	0.00434531	0.244445	0.0223313	0.89023	1	0.00960205	0.947967	1	0.0127297	0.939139	1
ENSG00000137752		yellow	-0.726158	5.3655e-07	CASP1	7621.69	0.389246	0.0693619	0.630501	0.32968	0.0398052	0.514572	0.320567	0.0771507	0.545132	0.396622	0.0176355	0.427075	-0.00910894	0.96104	1	0.0669517	0.699389	1	-0.0760611	0.690651	1
ENSG00000089737		yellow	0.721731	6.78355e-07	DDX24	4111.26	-0.174321	0.126844	0.734091	-0.351963	0.0173339	0.382777	-0.15777	0.353434	0.817865	-0.196492	0.204282	0.803307	0.194211	0.267725	1	0.155484	0.334505	1	0.0387274	0.82973	1
ENSG00000147471		yellow	-0.7136	1.03177e-06	PROSC	1620.14	0.610206	0.0665352	0.620081	0.363815	0.0669633	0.597939	0.411538	0.050079	0.484541	0.508246	0.012382	0.36695	0.0477403	0.823023	1	0.144461	0.486809	1	-0.0967212	0.654355	1
ENSG00000138172	Yes	yellow	-0.712192	1.10787e-06	CALHM2	2342.09	0.349302	0.123405	0.727314	0.364051	0.0515315	0.543791	0.270432	0.18195	0.673902	0.418888	0.0296633	0.479217	-0.0936308	0.650781	1	0.0548489	0.781812	1	-0.148482	0.480262	1
ENSG00000135048		yellow	0.707137	1.42562e-06	TMEM2	1706.94	-0.342815	0.00100324	0.097271	-0.767566	0.000100773	0.0356708	-0.298953	0.153245	0.640907	-0.530789	0.00863772	0.320485	0.468709	0.0276754	1	0.236819	0.25215	1	0.231894	0.282024	1
ENSG00000122224	Yes	yellow	0.701351	1.89054e-06	LY9	1095.18	0.329707	0.140539		-0.34176	0.110847	0.674582	0.100469	0.642168		-0.250302	0.247123		0.442355	0.0419118	1	0.0914783	0.675278	1	0.350885	0.107125	1
ENSG00000163848		yellow	0.695598	2.48701e-06	ZNF148	1287.46	-0.483241	0.0922971		-0.359001	0.0612934	0.575308	-0.349915	0.08923		-0.449779	0.0225074		0.00908024	0.965487	1	-0.0907983	0.653471	1	0.0998797	0.63916	1
ENSG00000109906		yellow	0.687821	3.56755e-06	ZBTB16	134.052	-1.90023	0.0568932		-0.195666	0.103086		-0.172614	0.0942035		-0.235136	0.0396268		0.0230627	0.813642	1	-0.0394955	0.715533	1	0.062561	0.501584	1
ENSG00000140983		yellow	0.687247	3.66224e-06	RHOT2	4733.05	-0.0765071	0.0135273	0.337206	-0.254387	0.021414	0.403548	-0.0804698	0.542431	0.900058	-0.344799	0.00317047	0.221685	0.173928	0.203701	1	-0.090418	0.460346	1	0.264347	0.0617362	1
ENSG00000150753		yellow	-0.686946	3.71276e-06	CCT5	3991.48	0.110067	0.161424	0.775354	0.111984	0.462454	0.898768	0.103877	0.550976	0.903272	0.351771	0.0271754	0.46674	-0.00810997	0.963939	1	0.239812	0.147463	1	-0.247924	0.178262	1
ENSG00000007944		yellow	0.68527	4.00627e-06	MYLIP	2464.32	-0.628839	0.000907888	0.094032	-0.509654	0.00120525	0.120272	-0.516634	0.00385317	0.195101	-0.528108	0.00130136	0.137992	-0.00699062	0.969683	1	-0.0184589	0.913813	1	0.0114679	0.951528	1
ENSG00000085265		yellow	-0.681004	4.85132e-06	FCN1	32642.3	0.0540034	0.128544	0.739171	0.329675	0.0279862	0.460673	0.0575369	0.737989	0.955308	0.0508936	0.745661	0.973822	-0.272164	0.124537	1	-0.278806	0.0875894	1	0.00664141	0.970895	1
ENSG00000135218	Yes	yellow	-0.679242	5.2454e-06	CD36	6725.43	-0.252174	0.0134328	0.33702	0.224767	0.15803	0.734501	-0.153014	0.396243	0.843936	0.400448	0.015844	0.410996	-0.377841	0.0416421	1	0.175702	0.307738	1	-0.553549	0.00360241	1
ENSG00000164111		yellow	-0.672142	7.14856e-06	ANXA5	13088.3	-0.1466	0.198586	0.816513	0.179413	0.138768	0.703486	-0.117136	0.414078	0.848939	0.0967501	0.448882	0.919085	-0.296572	0.0456105	1	-0.0826664	0.536257	1	-0.213907	0.162598	1
ENSG00000023902		yellow	-0.666313	9.16081e-06	PLEKHO1	10218.9	0.202173	0.0688548	0.630021	0.321955	0.00818495	0.283301	0.185035	0.198803	0.689937	0.16134	0.208694	0.806008	-0.136927	0.357941	1	-0.160624	0.231504	1	0.0236968	0.877536	1
ENSG00000167978		yellow	0.662329	1.08191e-05	SRRM2	36613.5	-0.151035	0.0751336	0.642714	-0.189361	0.0226472	0.419599	-0.145279	0.151519	0.639065	-0.18143	0.0397213	0.514246	0.0440828	0.675064	1	0.00793092	0.931862	1	0.0361519	0.740276	1
ENSG00000110987		yellow	0.659819	1.20003e-05	BCL7A	2417.06	-0.881522	0.0398468	0.508968	-0.469769	0.0213749	0.403548	-0.536199	0.0118055	0.288352	-0.39929	0.0549609	0.560617	-0.0664669	0.758095	1	0.0704917	0.739485	1	-0.136962	0.529431	1
ENSG00000245848		yellow	-0.656145	1.39409e-05	CEBPA	2521.86	0.203406	0.196867	0.814434	0.379566	0.033226	0.489284	0.172244	0.379967	0.835144	0.235997	0.200698	0.798331	-0.20735	0.301842	1	-0.143585	0.450442	1	-0.0637657	0.755576	1
ENSG00000121966	Yes	yellow	0.654567	1.48588e-05	CXCR4	35481	0.214374	0.00214395	0.156355	-0.369945	0.0293031	0.46688	0.106559	0.573646	0.913042	-0.51232	0.00365566	0.241303	0.476579	0.0141734	1	-0.1424	0.434917	1	0.618987	0.00183532	1
ENSG00000196187	Yes	yellow	0.649426	1.82441e-05	TMEM63A	2711.72	0.0881304	0.0890851	0.66859	-0.238338	0.206532	0.778088	0.0104325	0.95917	0.990785	-0.431934	0.026155	0.46674	0.248822	0.231432	1	-0.193636	0.331858	1	0.442465	0.0362843	1
ENSG00000162704		yellow	-0.645922	2.09382e-05	ARPC5	10555.1	0.156717	0.0553479	0.579444	0.284191	0.00621264	0.247115	0.147656	0.236694	0.719316	0.117955	0.283133	0.860748	-0.13654	0.291016	1	-0.166242	0.14922	1	0.0297024	0.824357	1
ENSG00000241553		yellow	-0.645505	2.12811e-05	ARPC4	5122.03	0.243304	0.0845994	0.667624	0.15121	0.234651	0.797308	0.217924	0.145371	0.636317	0.33539	0.0122619	0.365814	0.06672	0.666272	1	0.184193	0.188133	1	-0.117473	0.461644	1
ENSG00000136051		yellow	0.644524	2.21097e-05	KIAA1033	3890.63	-0.0990941	0.0649347	0.61265	-0.216108	0.103509	0.663513	-0.100148	0.518896	0.888032	-0.361358	0.00960903	0.338586	0.115972	0.469633	1	-0.145262	0.31878	1	0.261236	0.114047	1
ENSG00000106546		yellow	-0.641234	2.51068e-05	AHR	9061.49	0.139803	0.220106	0.836663	0.286629	0.0440636	0.525829	0.129491	0.431827	0.8562	0.209641	0.160084	0.766122	-0.157152	0.355028	1	-0.0769933	0.620503	1	-0.080159	0.646583	1
ENSG00000150681		yellow	-0.629893	3.84781e-05	RGS18	1477.89	0.675014	0.0865037	0.667624	0.452414	0.0305177	0.475575	0.414001	0.0541994	0.502158	0.4649	0.0284904	0.470245	-0.0384117	0.859643	1	0.0124929	0.953754	1	-0.0509051	0.815802	1
ENSG00000157240	Yes	yellow	-0.628816	4.00354e-05	FZD1	1070.79	-0.398908	0.00832935		0.527887	0.0102884	0.316327	-0.141634	0.507472		0.0381582	0.855424		-0.669684	0.00196525	1	-0.489824	0.0215426	1	-0.179866	0.409613	1
ENSG00000118855		yellow	-0.627611	4.18445e-05	MFSD1	5307.98	0.159335	0.152616	0.767243	0.174546	0.142795	0.71384	0.148312	0.29364	0.777539	0.27919	0.0262392	0.46674	-0.0262351	0.857513	1	0.104651	0.425964	1	-0.130887	0.385781	1
ENSG00000152795		yellow	0.626059	4.42846e-05	HNRNPDL	10983.7	-0.258133	0.00270515	0.175014	-0.164782	0.0106075	0.317556	-0.250081	0.00165242	0.136937	-0.187481	0.0063124	0.287818	-0.0853012	0.301762	1	-0.022699	0.753572	1	-0.0626024	0.465585	1
ENSG00000162924		yellow	0.619553	5.59752e-05	REL	2947.26	-0.415438	0.0396947	0.508968	-0.48954	0.00491971	0.231267	-0.321503	0.0955663	0.582855	-0.168504	0.350332	0.899442	0.168053	0.395319	1	0.321079	0.0850198	1	-0.153028	0.448478	1
ENSG00000109320		yellow	-0.618042	5.90594e-05	NFKB1	4622.88	0.296308	0.109446	0.694239	0.265244	0.0353456	0.498112	0.263557	0.0758329	0.542478	0.242624	0.0675319	0.599305	-0.00168367	0.991247	1	-0.0226212	0.870463	1	0.0209378	0.894801	1
ENSG00000176749		yellow	0.614143	6.77445e-05	CDK5R1	433.017	-1.46171	0.0557122		-0.311317	0.139687		-0.440419	0.0238603		-0.519262	0.0119509		-0.129173	0.498788	1	-0.208044	0.304572	1	0.0788728	0.672777	1
ENSG00000132773		yellow	0.610614	7.65838e-05	TOE1	698.007	0.024368	0.018923		-0.619243	0.00359352		-0.0577304	0.789256		-0.125307	0.560031		0.561667	0.00984262	1	0.494066	0.0231352	1	0.0676031	0.756775	1
ENSG00000184588		yellow	0.608289	8.29595e-05	PDE4B	4167.57	-0.351108	0.0393107	0.508968	-0.590379	0.00461589	0.226641	-0.266692	0.214346	0.697565	-0.385196	0.0687668	0.599836	0.323764	0.135847	1	0.205228	0.339727	1	0.118537	0.587447	1
ENSG00000015133		yellow	0.607631	8.48509e-05	CCDC88C	3694.46	0.0580529	0.114152	0.705169	-0.347906	0.0361864	0.500244	0.0124871	0.946559	0.987447	-0.228	0.186779	0.781531	0.360443	0.0595577	1	0.119918	0.502664	1	0.240529	0.219291	1
ENSG00000153094		yellow	0.607076	8.64731e-05	BCL2L11	1311.3	-0.354213	0.0969442		-0.397543	0.0579323	0.562815	-0.258951	0.228875		-0.497129	0.0194053		0.138624	0.523561	1	-0.0996169	0.644308	1	0.238246	0.275639	1
ENSG00000117394	Yes	yellow	0.607041	8.65777e-05	SLC2A1	3224.72	-0.320416	0.0530074	0.574488	-0.436365	0.0111539	0.326293	-0.26744	0.161836	0.650325	-0.372045	0.037014	0.501932	0.168945	0.38883	1	0.0643252	0.727285	1	0.104621	0.601514	1
ENSG00000141367		yellow	-0.605077	9.25596e-05	CLTC	6960.33	0.195796	0.0701591	0.630501	0.30056	0.0137895	0.349148	0.181494	0.208511	0.696852	0.255186	0.0472738	0.551322	-0.119073	0.425012	1	-0.0453759	0.735925	1	-0.0736975	0.632464	1
ENSG00000162976		yellow	-0.602818	9.98955e-05	PQLC3	1801.2	0.446136	0.18009	0.798685	0.268669	0.0879885	0.629533	0.352732	0.048528	0.479167	0.15804	0.336085	0.885373	0.0840812	0.647567	1	-0.11064	0.516541	1	0.194724	0.301987	1
ENSG00000171681		yellow	0.60183	0.000103267	ATF7IP	3995.56	0.0268896	0.135786	0.748146	-0.107258	0.516495	0.90783	-0.00526295	0.977386	0.994604	-0.379444	0.0273733	0.46674	0.102014	0.592673	1	-0.272223	0.126587	1	0.374241	0.055234	1
ENSG00000141298		yellow	0.600606	0.000107585	SSH2	4103.39	-0.352409	0.0194771	0.383648	-0.445102	0.00214711	0.157558	-0.303957	0.0692297	0.530407	-0.247194	0.103661	0.685997	0.141153	0.413219	1	0.197925	0.21094	1	-0.0567723	0.748932	1
ENSG00000110031		yellow	-0.600433	0.000108209	LPXN	3747.52	0.277508	0.0185911	0.377152	0.408957	0.0079928	0.283301	0.247164	0.159853	0.647147	0.44356	0.00587748	0.285888	-0.16181	0.371334	1	0.0346086	0.836131	1	-0.19642	0.290377	1
ENSG00000147416		yellow	-0.600332	0.000108572	ATP6V1B2	5586.81	0.0967383	0.0473139	0.539611	0.302046	0.0184879	0.388042	0.0991532	0.510555	0.883159	0.309025	0.0220083	0.464621	-0.202909	0.192629	1	0.00698135	0.960506	1	-0.209892	0.19133	1
ENSG00000065526		yellow	0.598047	0.000117143	SPEN	6454.35	-0.320884	0.0625965	0.602522	-0.179675	0.106905	0.667879	-0.290773	0.0288797	0.41101	-0.261272	0.0264881	0.46674	-0.111108	0.420113	1	-0.0816013	0.50837	1	-0.0295067	0.835946	1
ENSG00000196218		yellow	-0.597107	0.000120839	RYR1	761.826	0.564489	0.192232		0.453176	0.0345284		0.323715	0.134352		0.300381	0.164913		-0.129484	0.551489	1	-0.152828	0.484032	1	0.0233445	0.914626	1
ENSG00000138964		yellow	-0.592477	0.000140629	PARVG	19397.9	-0.0614194	0.0768652	0.646445	0.098057	0.147126	0.716001	-0.0566579	0.495956	0.877938	0.136952	0.0570483	0.566457	-0.154719	0.0735355	1	0.0388959	0.607719	1	-0.193615	0.0310349	1
ENSG00000198223	Yes	yellow	-0.589763	0.000153542	CSF2RA	2493.06	0.335936	0.135519	0.748146	0.387148	0.0329669	0.489284	0.264762	0.182658	0.673902	0.356895	0.0570471	0.566457	-0.122401	0.546891	1	-0.0302541	0.875587	1	-0.0921481	0.656237	1
ENSG00000136485		yellow	-0.583858	0.000185381	DCAF7	4381.61	0.159827	0.0717275	0.631225	0.280446	0.0274217	0.458749	0.151023	0.312763	0.795771	0.304435	0.0229405	0.46674	-0.129432	0.4026	1	0.0239918	0.863814	1	-0.153425	0.336158	1
ENSG00000147316		yellow	0.583443	0.000187826	MCPH1	1001.5	-0.289236	0.130678		-0.237774	0.226432	0.791028	-0.223085	0.285476		-0.481843	0.0167505		0.0146922	0.944868	1	-0.244122	0.236369	1	0.258818	0.22918	1
ENSG00000187653		yellow	-0.582701	0.000192269	TMSB4XP8	8138.61	0.329215	0.0387907	0.508968	0.305113	0.00877584	0.288008	0.296768	0.0319877	0.427298	0.196175	0.11036	0.689368	-0.00834087	0.953559	1	-0.108943	0.397044	1	0.100603	0.496612	1
ENSG00000152942		yellow	0.580758	0.000204361	RAD17	842.274	-0.658392	0.131666		-0.474982	0.0275537		-0.346202	0.109317		-0.146411	0.500059		0.128803	0.553035	1	0.32866	0.133176	1	-0.199863	0.357405	1
ENSG00000113504	Yes	yellow	-0.578096	0.000222033	SLC12A7	6051.51	-0.249767	0.191512	0.813698	0.119278	0.449461	0.897431	-0.167895	0.34834	0.816474	0.220475	0.180184	0.776882	-0.287217	0.118857	1	0.101209	0.553466	1	-0.38843	0.0397246	1
ENSG00000128908		yellow	0.577947	0.000223057	INO80	2331.46	0.071924	0.0339658	0.494235	-0.282265	0.0824981	0.624438	0.0188658	0.918013	0.98543	-0.418655	0.0133996	0.385222	0.301174	0.109839	1	-0.13641	0.437124	1	0.437589	0.0233488	1
ENSG00000103978	Yes	yellow	0.573663	0.000254511	TMEM87A	1696.84	-0.30935	0.112648	0.700793	-0.224291	0.180688	0.75849	-0.253535	0.176469	0.668105	-0.419997	0.0158888	0.410996	-0.0292497	0.879262	1	-0.195733	0.277751	1	0.166484	0.398091	1
ENSG00000138834		yellow	0.572868	0.000260768	MAPK8IP3	8308.42	-0.321123	0.0711343	0.630745	-0.100818	0.414556	0.891049	-0.282889	0.0525091	0.495735	-0.304892	0.0191931	0.442726	-0.182087	0.227527	1	-0.204087	0.133912	1	0.0220003	0.887667	1
ENSG00000189241		yellow	0.572564	0.000263197	TSPYL1	2572.67	-0.150248	0.0261595	0.437033	-0.455556	0.00328491	0.19668	-0.146936	0.405205	0.844571	-0.295308	0.0679632	0.599305	0.308654	0.0894091	1	0.160262	0.340478	1	0.148394	0.426154	1
ENSG00000169020		yellow	-0.569863	0.00028567	ATP5I	795.728	1.21937	0.0549708		0.363869	0.0933773		0.591103	0.00620247		0.268429	0.218071		0.227311	0.293734	1	-0.0954658	0.663232	1	0.322784	0.135361	1
ENSG00000137492		yellow	0.567637	0.000305464	PRKRIR	2543.01	0.0045335	0.0110599	0.314485	-0.306554	0.0179874	0.387056	-0.0169193	0.91139	0.984767	-0.373548	0.00614238	0.287818	0.28966	0.065288	1	-0.0670011	0.638106	1	0.356663	0.0277441	1
ENSG00000176463	Yes	yellow	-0.567271	0.000308837	SLCO3A1	1209.24	-0.543489	0.0109265		0.368047	0.0484208	0.533003	-0.284219	0.160044		0.22415	0.243474		-0.652405	0.00158521	1	-0.143914	0.466441	1	-0.5085	0.0155063	1
ENSG00000067182	Yes	yellow	-0.566472	0.000316308	TNFRSF1A	2508.73	0.20733	0.226689	0.838112	0.202006	0.233632	0.796457	0.175551	0.353647	0.817865	0.362162	0.0397495	0.514246	-0.0264584	0.891619	1	0.160178	0.379377	1	-0.186638	0.34722	1
ENSG00000159082		yellow	-0.566448	0.000316533	SYNJ1	753.082	0.227588	0.0526124		0.32612	0.115404		0.194147	0.364943		0.566101	0.00718519		-0.132008	0.542522	1	0.240034	0.262206	1	-0.37205	0.0883923	1
ENSG00000244313		yellow	0.565567	0.000324964	RP11-425L10.1	12725.5	0.0287897	0.152997	0.767243	-0.20257	0.0415953	0.523438	0.0204188	0.864717	0.972508	-0.106317	0.312559	0.875545	0.223	0.072718	1	0.0962564	0.38369	1	0.126744	0.324567	1
ENSG00000177189		yellow	-0.562571	0.00035516	RPS6KA3	9131.6	-0.109605	0.0359987	0.496406	0.130392	0.198239	0.772828	-0.0911913	0.454871	0.862256	0.242158	0.0239908	0.46674	-0.221597	0.0797776	1	0.111772	0.320701	1	-0.33337	0.0108892	1
ENSG00000184060		yellow	-0.562176	0.000359326	ADAP2	977.657	0.371255	0.179736		0.202072	0.321834	0.854132	0.251362	0.237693		0.455479	0.0284646		0.0493033	0.819239	1	0.253461	0.231515	1	-0.204161	0.348435	1
ENSG00000099800		yellow	-0.558786	0.000396867	TIMM13	949.453	0.208456	0.129874		0.401507	0.0670062		0.173169	0.416473		0.460119	0.0352981		-0.228413	0.281803	1	0.0586324	0.788216	1	-0.287053	0.17286	1
ENSG00000127824		yellow	0.556754	0.000421013	TUBA4A	1088.72	-0.61452	0.0324434		-0.629861	0.00366162	0.204133	-0.372548	0.0845719		-0.416786	0.0557418		0.257382	0.234632	1	0.213134	0.330913	1	0.0442494	0.837873	1
ENSG00000109920		yellow	0.555798	0.000432825	FNBP4	3936.66	-0.0607531	0.131289	0.743174	-0.28025	0.0376431	0.506086	-0.0670965	0.669761	0.938775	-0.244776	0.0839428	0.644378	0.213172	0.189531	1	0.035475	0.810354	1	0.177698	0.288456	1
ENSG00000197136		yellow	0.555153	0.000440957	PCNXL3	2802.77	0.0269912	0.054659	0.579444	-0.281518	0.0176473	0.383122	0.0108758	0.938386	0.987238	-0.201446	0.107419	0.689261	0.292414	0.0446432	1	0.0800749	0.541028	1	0.21234	0.158019	1
ENSG00000131013		yellow	0.555119	0.000441395	PPIL4	543.36	-0.702017	0.163707		-0.483384	0.0274725		-0.335376	0.114784		-0.265088	0.224973		0.148049	0.484178	1	0.218368	0.31643	1	-0.0703213	0.737563	1
ENSG00000162413		yellow	0.551879	0.000484376	KLHL21	1493.76	-0.745117	0.000311982	0.056768	-0.640561	0.000786017	0.0971927	-0.554592	0.00687599	0.241903	-0.750605	0.000129904	0.044524	0.0859747	0.681136	1	-0.110072	0.584627	1	0.196049	0.356173	1
ENSG00000136238		yellow	-0.551147	0.00049458	RAC1	5764.86	-0.258162	0.149149	0.759063	0.144181	0.294139	0.841781	-0.19743	0.217097	0.698928	0.143977	0.318319	0.880302	-0.341648	0.0385269	1	-0.00020256	0.998926	1	-0.341449	0.0446253	1
ENSG00000102054		yellow	0.550283	0.000506886	RBBP7	2399.52	-0.0224144	0.0589581	0.589713	-0.353157	0.0112998	0.326293	-0.0382392	0.813219	0.970654	-0.216295	0.139157	0.726636	0.314947	0.0593789	1	0.136871	0.369536	1	0.178078	0.300381	1
ENSG00000144674		yellow	0.548542	0.000532498	GOLGA4	2530.1	-0.251171	0.0682583	0.629462	-0.364278	0.0282656	0.460673	-0.21938	0.238958	0.722037	-0.398339	0.021083	0.459558	0.144916	0.448772	1	-0.0340673	0.848978	1	0.178985	0.360688	1
ENSG00000020633		yellow	0.545776	0.000575563	RUNX3	4985.37	-0.220739	0.142676	0.750906	-0.267421	0.046703	0.531763	-0.198231	0.206651	0.695833	-0.26849	0.0573491	0.566457	0.0691945	0.669519	1	-0.00107012	0.99421	1	0.070265	0.674012	1
[truncated: 63,434 more rows]

## Sheet: Supplementary File 1H
Supplementary File 1H. Results from differential expression analysis and co-expression network analysis in cohort II							LRT			AU vs HC			IU vs HC			BU vs HC			IU vs AU			BU vs AU			IU vs BU
[truncated: 65,222 more rows]

## Sheet: Supplementary File 1I
Supplementary File 1I. 147 replicated co-expressed genes for cohort 1 and cohort 2							COHORT 1 RNA-SEQ									COHORT 2 RNA-SEQ
[truncated: 148 more rows]
