# Supplementary figures and images for: Transcriptome network analysis implicates CX3CR1-positive type 3 dendritic cells in non-infectious uveitis
Source: eLife journal article supplement (doi:10.7554/elife.74913), 2023-04-12

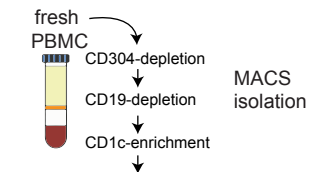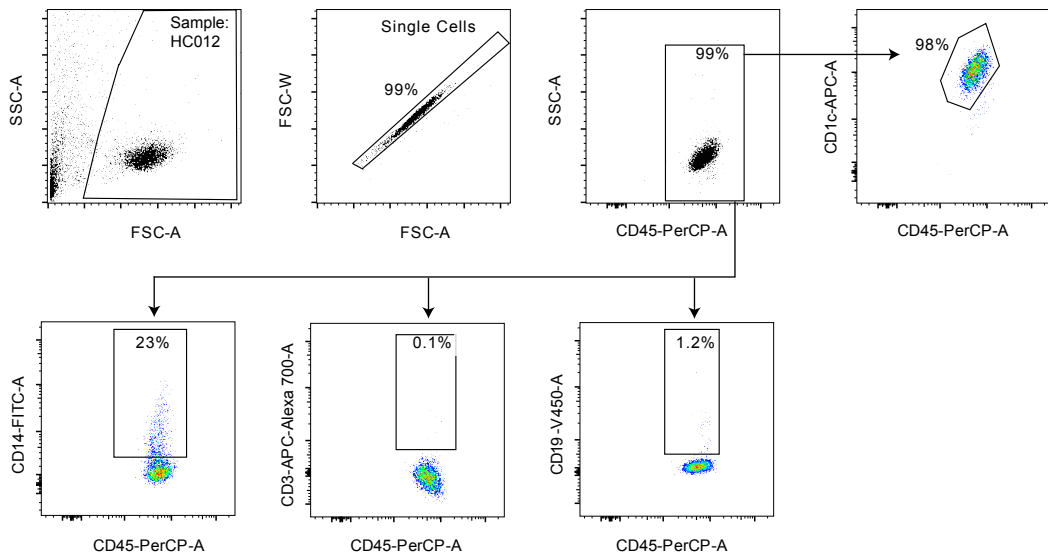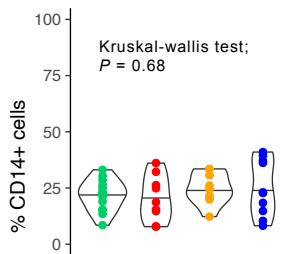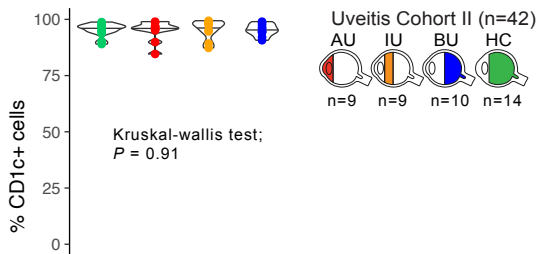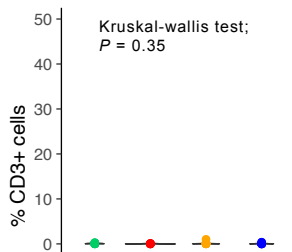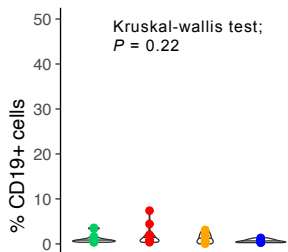

Supplement: supp [file elife_poa_e74913_Figure_1_figure_supplement_1.pdf › elife_poa_e74913_Figure_1_figure_supplement_1.pdf]

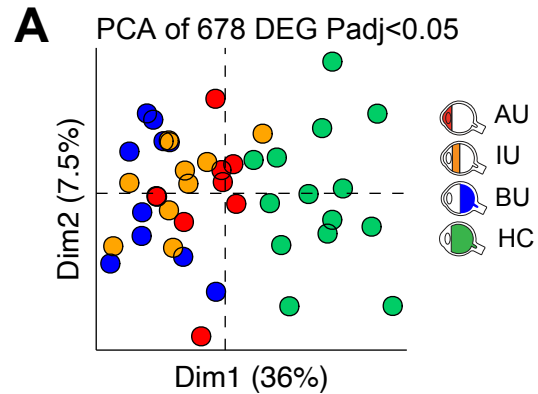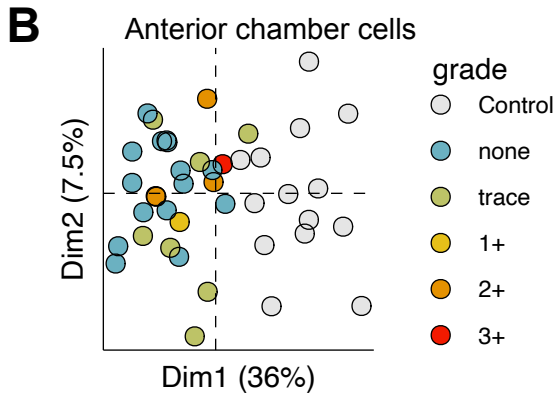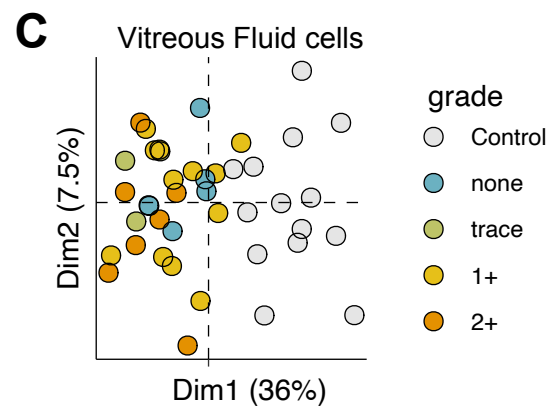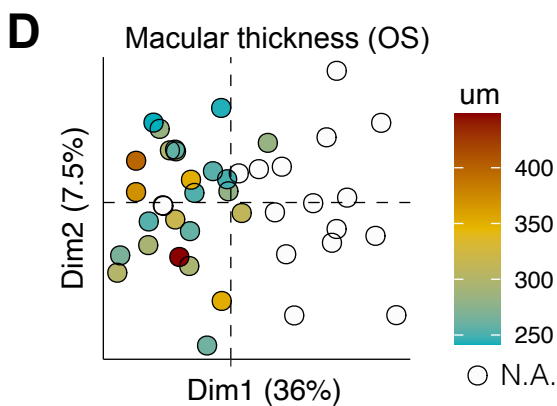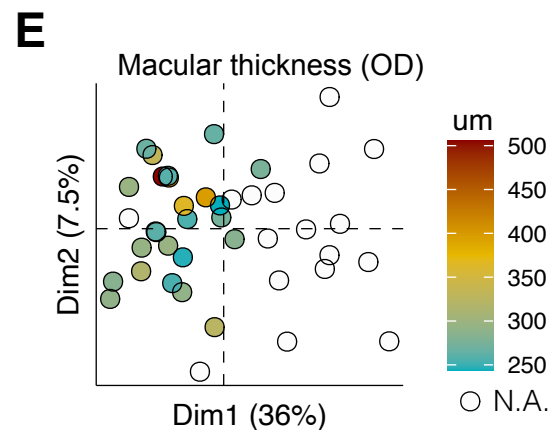

Supplement: supp [file elife_poa_e74913_Figure_1_figure_supplement_2.pdf › elife_poa_e74913_Figure_1_figure_supplement_2.pdf]

**A**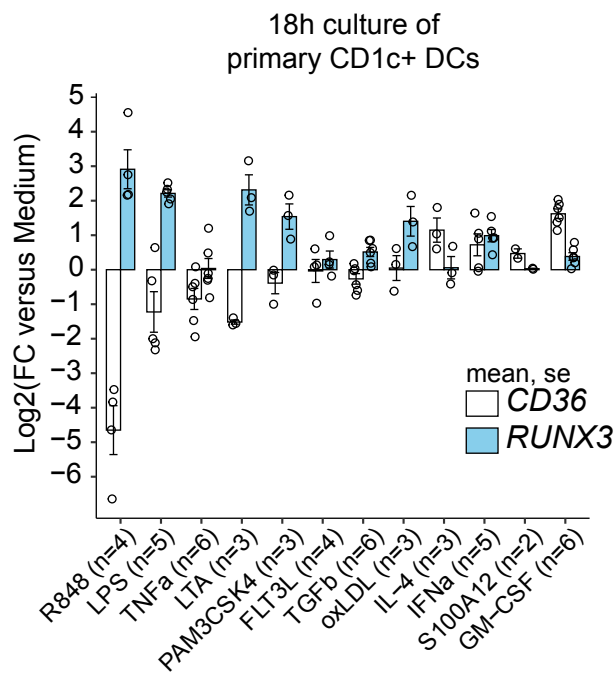**B**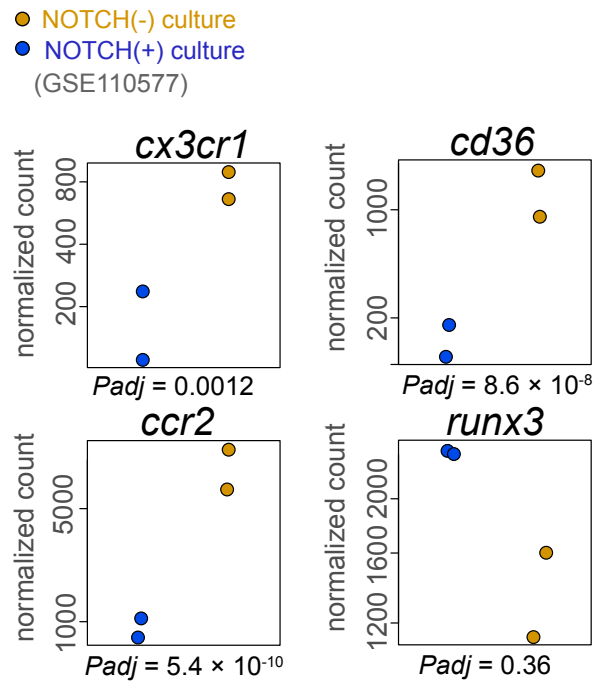**C**

Gene set :  
 Top 1%  
 genes (n=201)  
 in NOTCH(-)  
 cDC2 culture  
 (GSE110577)

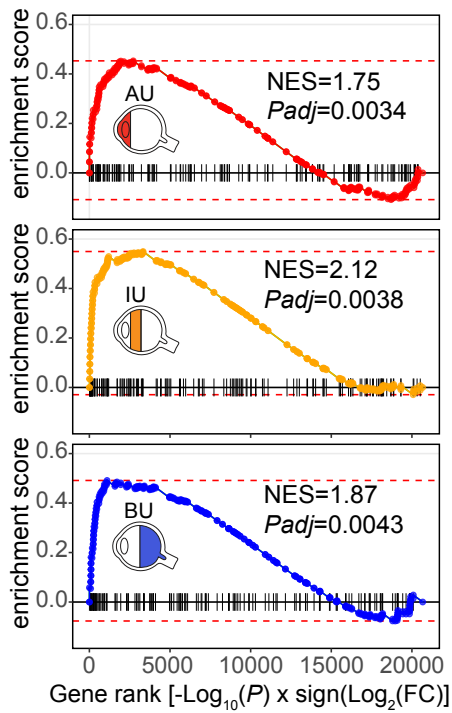

Supplement: supp [file elife_poa_e74913_Figure_2_figure_supplement_1.pdf › elife_poa_e74913_Figure_2_figure_supplement_1.pdf]

**A**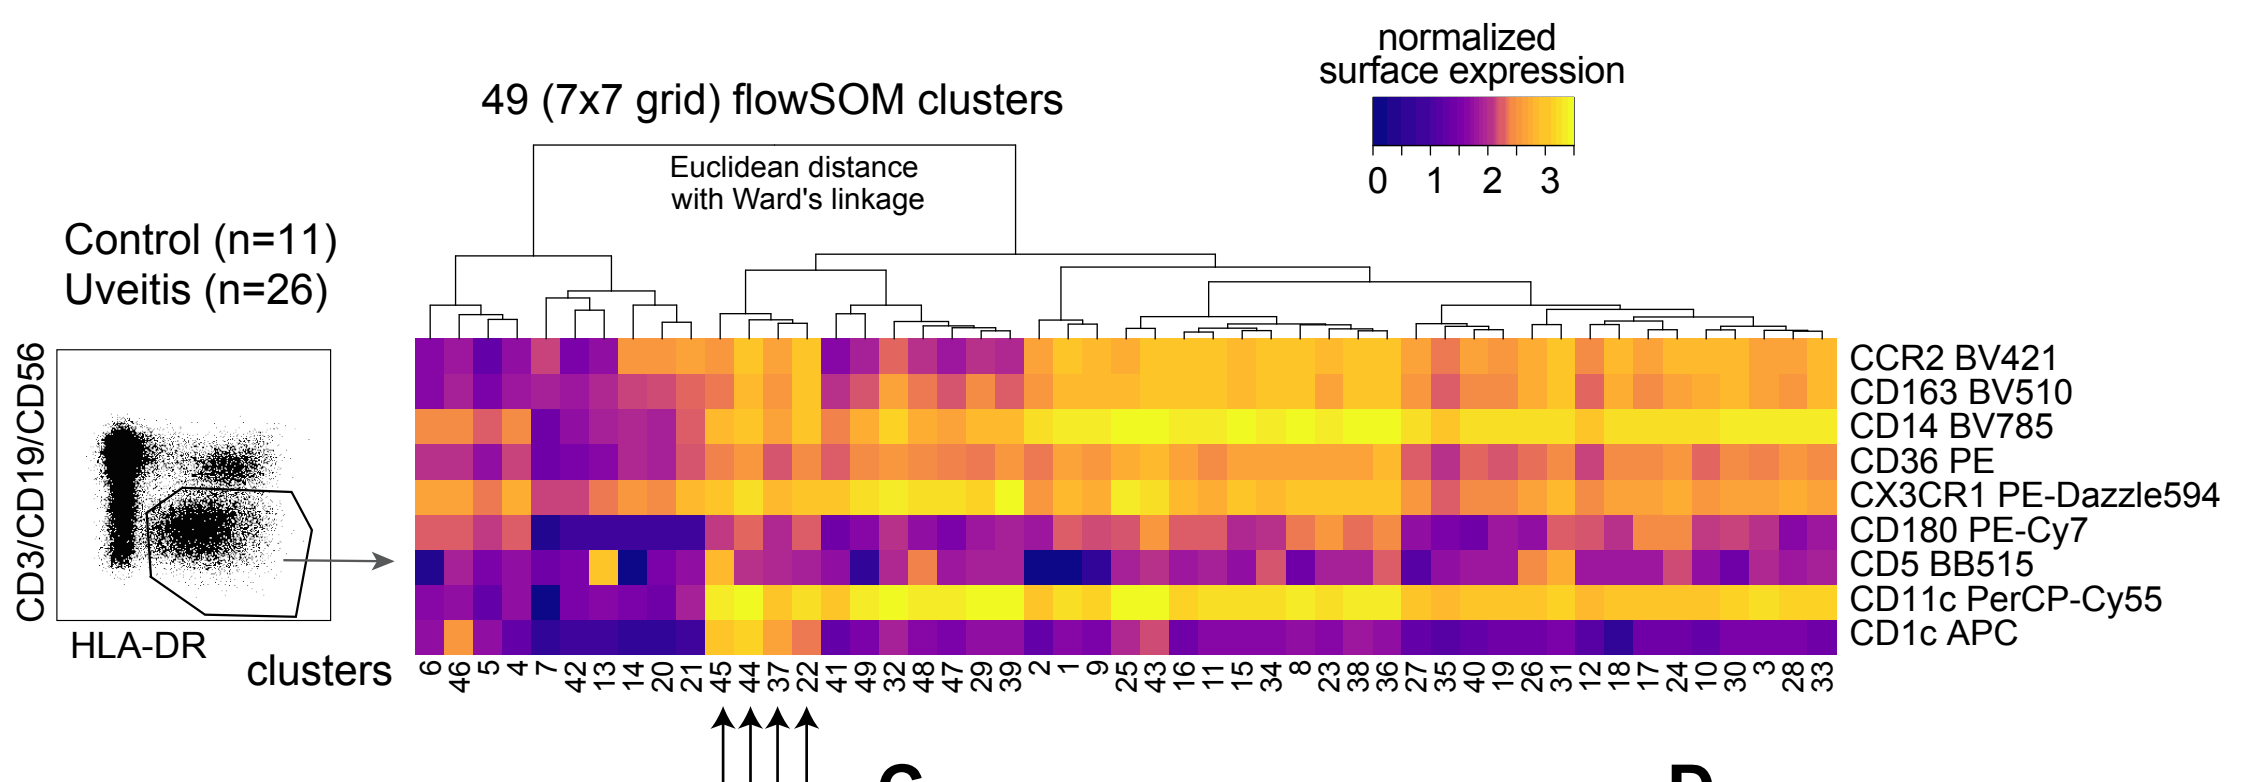**B**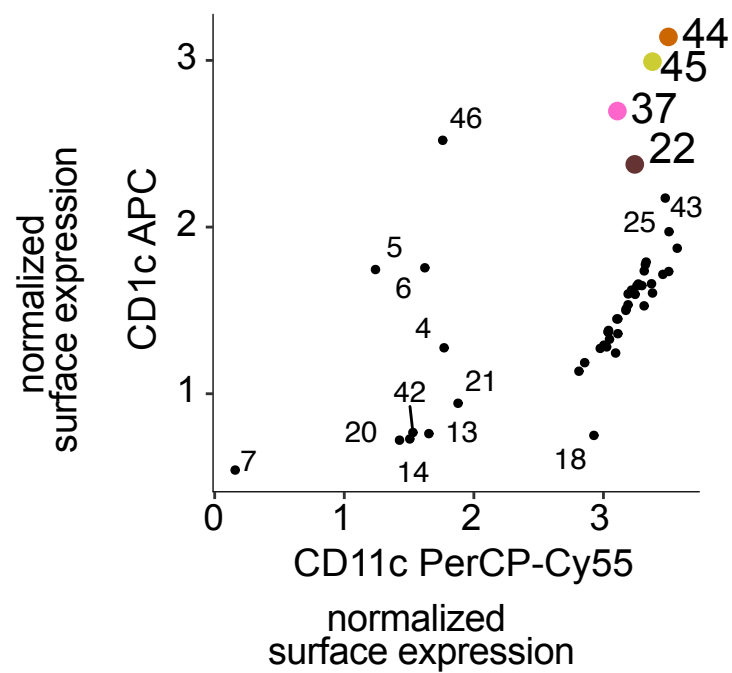**C**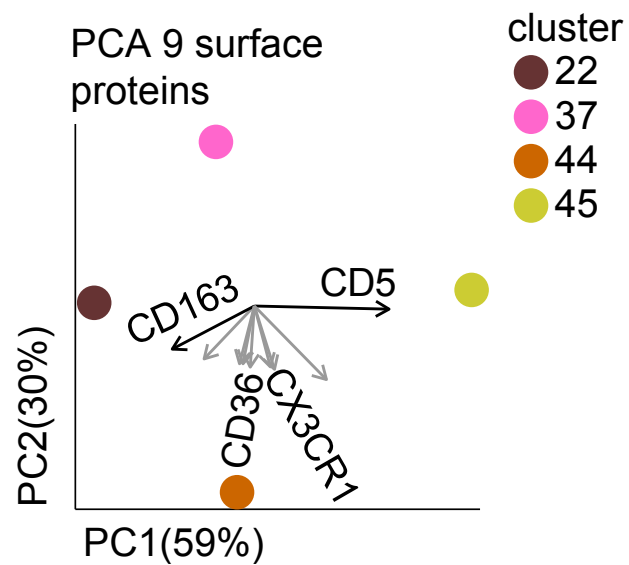**D**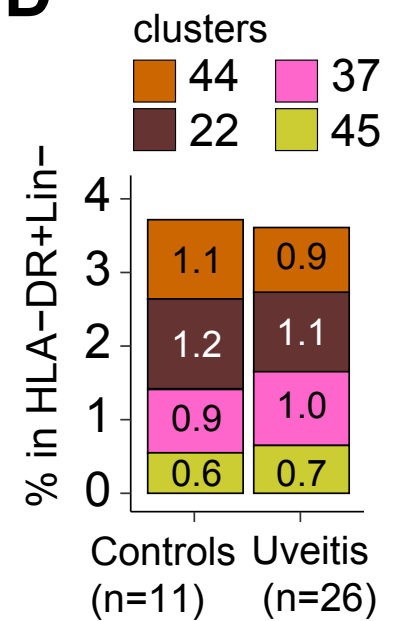**E**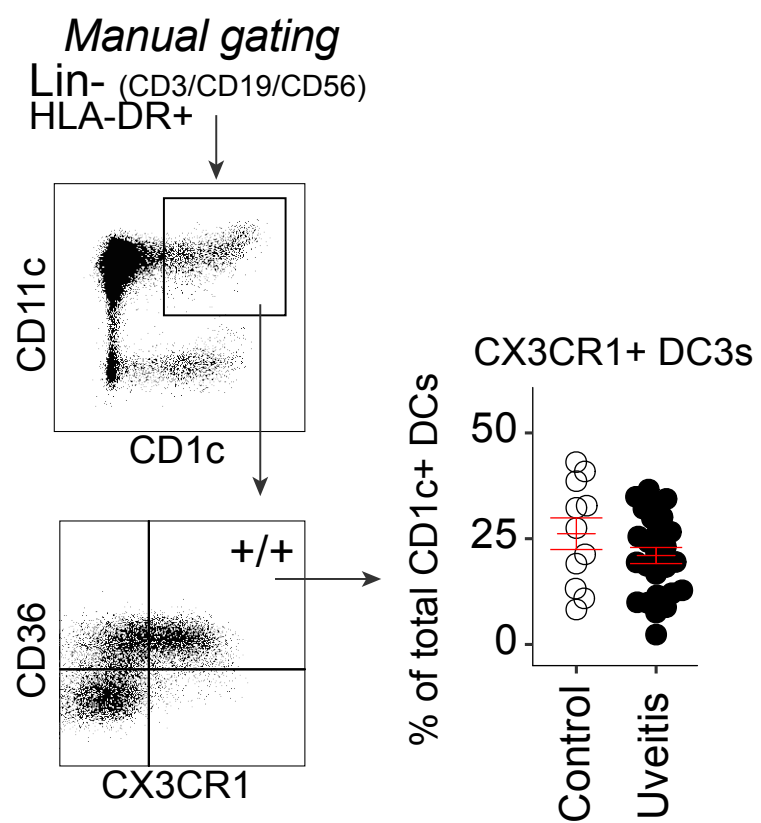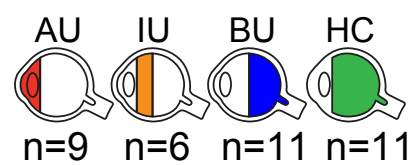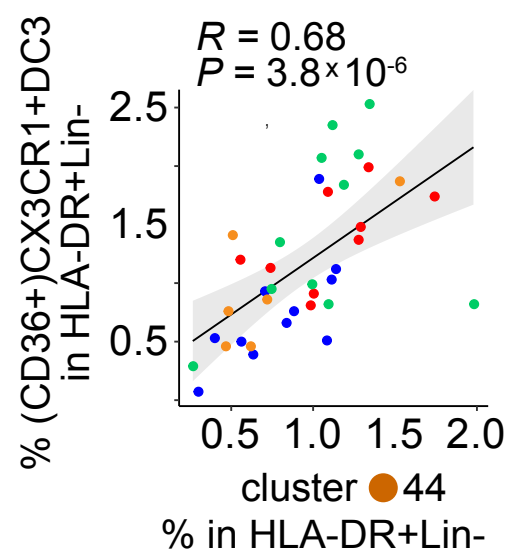**F**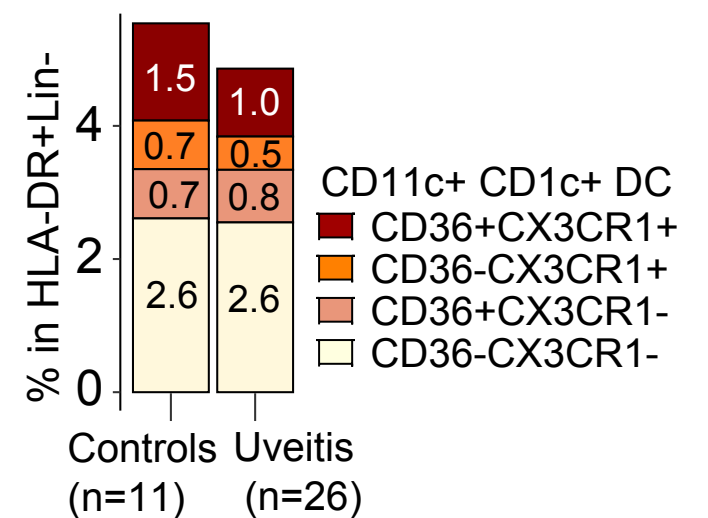

Supplement: supp [file elife_poa_e74913_Figure_3_figure_supplement_1.pdf › elife_poa_e74913_Figure_3_figure_supplement_1.pdf]

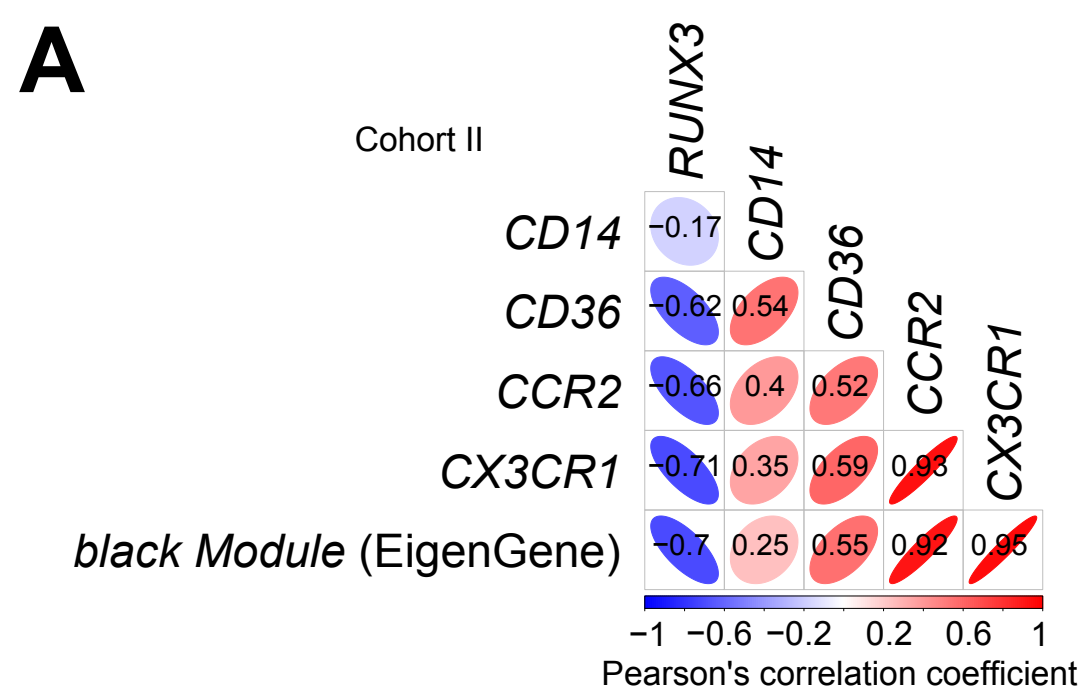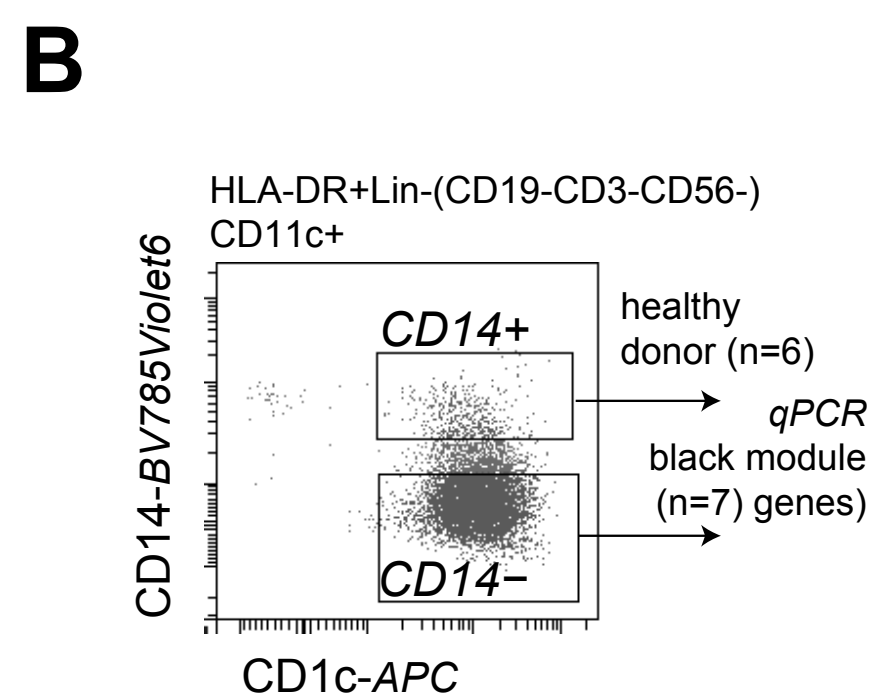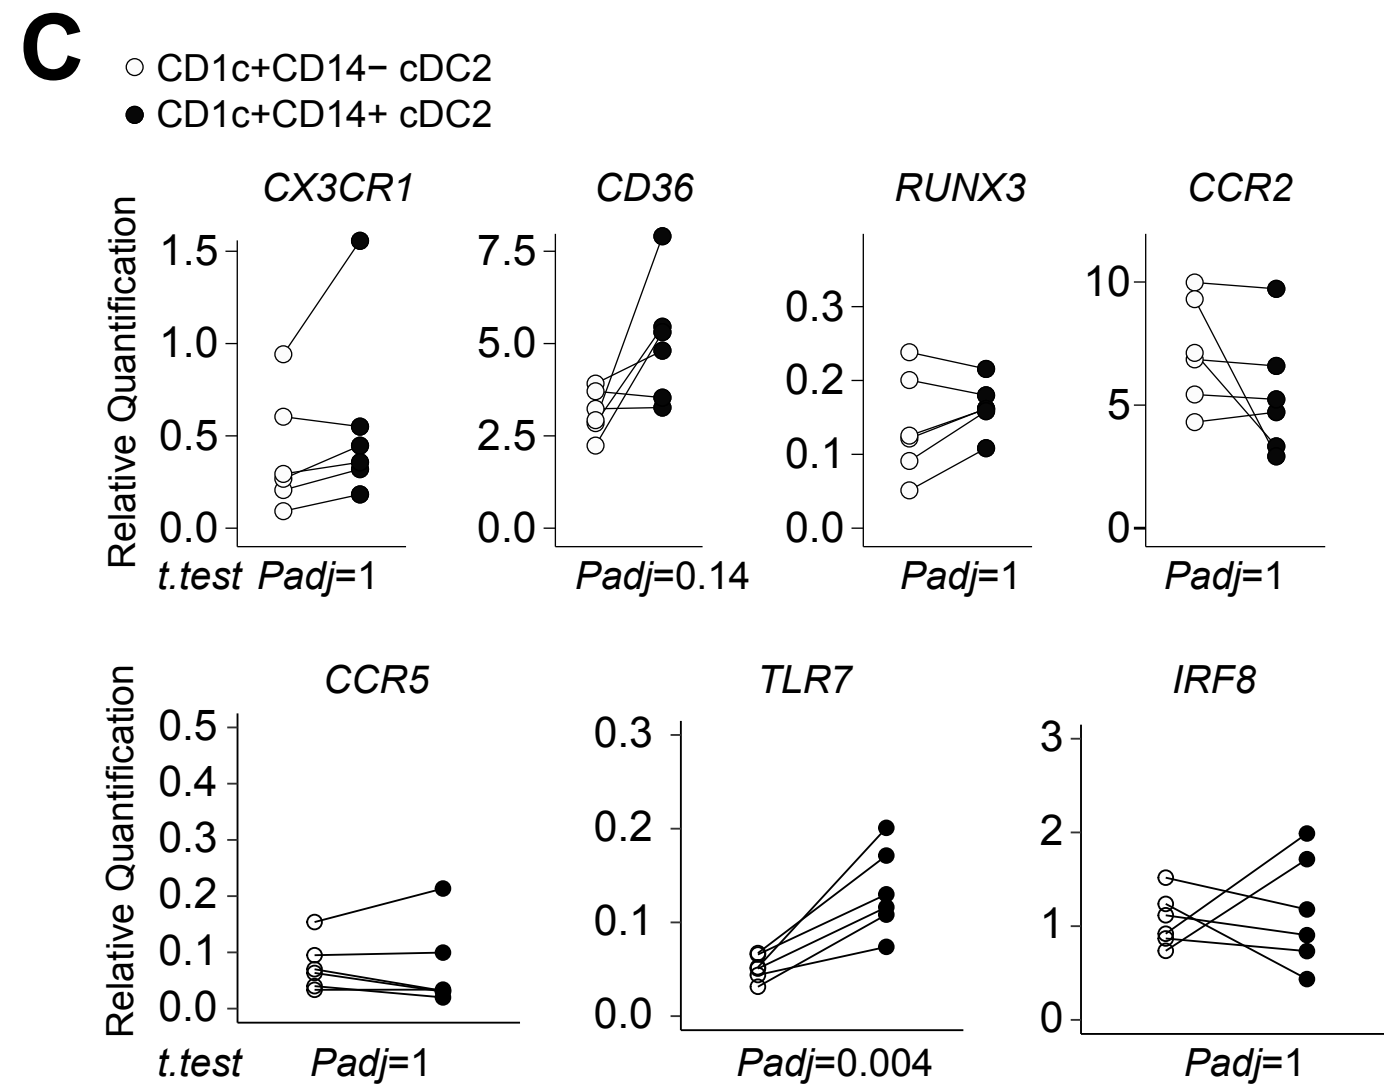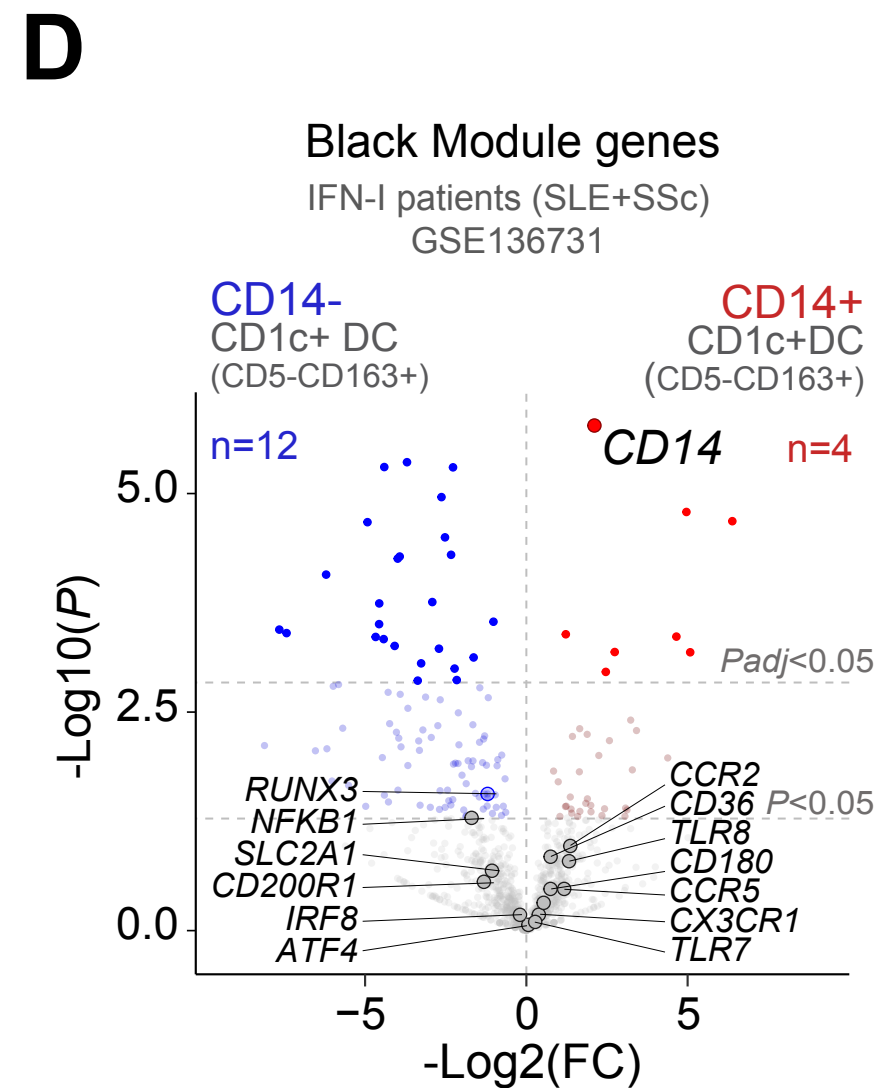

Supplement: supp [file elife_poa_e74913_Figure_3_figure_supplement_2.pdf › elife_poa_e74913_Figure_3_figure_supplement_2.pdf]

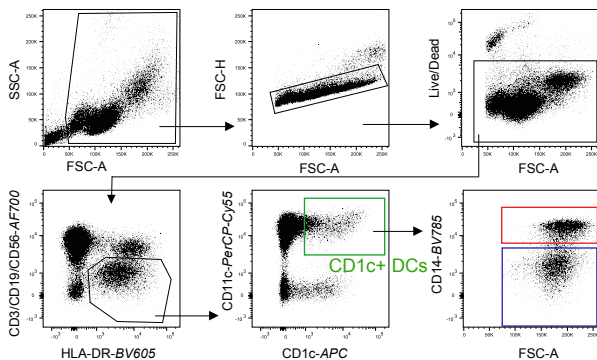

CD14+CD1c+ DCs

CD14-CD1c+ DCs

CD1c+ DCs

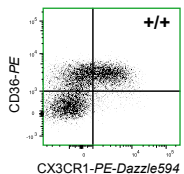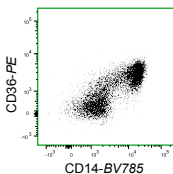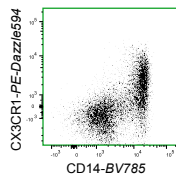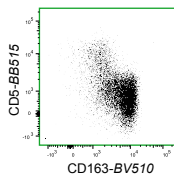

CD14+CD1c+ DCs

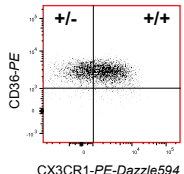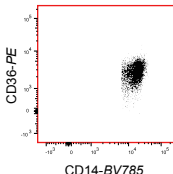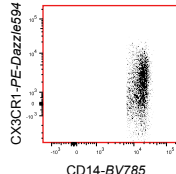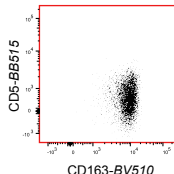

CD14-CD1c+ DCs

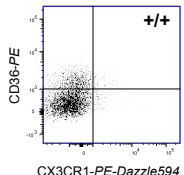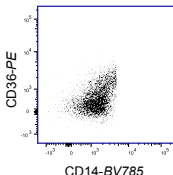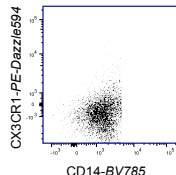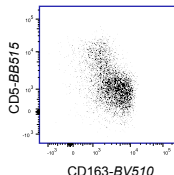

Supplement: supp [file elife_poa_e74913_Figure_3_figure_supplement_3.pdf › elife_poa_e74913_Figure_3_figure_supplement_3.pdf]
